# Supplementary material for: The human cytomegalovirus-encoded pUS28 antagonizes CD4+ T cell recognition by targeting CIITA
Source: eLife. 2025 Jul 3;14:e96414. doi: 10.7554/eLife.96414 (PMC12226020; doi:10.7554/eLife.96414)
Supplement: Supplementary file 1. [file elife-96414-supp1.xlsx]

## Sheet: ANOVA_Results
Supplementary Table XY
1unpaired, two-sided, equal variances
2 corrected according to the method of Benjamini-Hochberg
3Tukey's honest significant difference method
				Mean Intensities						Posthoc p-values for pairwise comparisons3						Ratios of mean intensities for groupwise comparisons
Protein.Group	Protein.Names	Genes	First.Protein.Description	US28_CIITA	US28_Ctrl	Ctrl_CIITA	Ctrl_Ctrl	ANOVA1 p-value	ANOVA pFDR-value2	US28_CIITA_vs_US28_Ctrl	US28_CIITA_vs_Ctrl_CIITA	US28_CIITA_vs_Ctrl_Ctrl	US28_Ctrl_vs_Ctrl_CIITA	US28_Ctrl_vs_Ctrl_Ctrl	Ctrl_CIITA_vs_Ctrl_Ctrl	US28_CIITA_vs_US28_Ctrl	US28_CIITA_vs_Ctrl_CIITA	US28_CIITA_vs_Ctrl_Ctrl	US28_Ctrl_vs_Ctrl_CIITA	US28_Ctrl_vs_Ctrl_Ctrl	Ctrl_CIITA_vs_Ctrl_Ctrl
P33076	C2TA_HUMAN	CIITA	MHC class II transactivator	135454	27373.2	2.00317e+06	30423.4	4.28455e-17	2.83166e-13	5.57598e-12	8.11573e-14	1.41707e-11	2.70894e-14	0.272162	2.70894e-14	4.9484	0.0676198	4.45229	0.013665	0.899743	65.843
Q15375	EPHA7_HUMAN	EPHA7	Ephrin type-A receptor 7	30038.6	103763	132910	186433	2.15653e-14	2.96208e-11	1.66656e-12	4.54747e-13	7.42739e-14	0.000126997	1.30246e-08	5.81052e-06	0.289492	0.226008	0.161123	0.780706	0.556573	0.712909
A0A1I9XCK7	A0A1I9XCK7_HCMV	US28	Chemokine receptor homologue	8.71223e+06	1.44273e+07	30259	30132.5	2.68914e-14	2.96208e-11	0.0408189	1.27831e-12	1.27187e-12	7.02105e-13	6.98441e-13	0.999993	0.60387	287.922	289.131	476.795	478.796	1.0042
Q8N9N5	BANP_HUMAN	BANP	Protein BANP	33182.9	31309.3	174111	187528	1.98186e-13	1.61854e-10	0.706996	4.1277e-12	2.80487e-12	3.00515e-12	2.19269e-12	0.549563	1.05984	0.190585	0.176949	0.179824	0.166958	0.928451
Q99988	GDF15_HUMAN	GDF15	Growth/differentiation factor 15	173195	62627.2	43028.5	29708	9.10617e-13	4.62944e-10	5.32339e-10	5.58442e-12	9.5346e-13	2.76235e-05	1.65911e-08	3.52005e-05	2.7655	4.02513	5.82992	1.45548	2.10809	1.44838
P04233	HG2A_HUMAN	CD74	HLA class II histocompatibility antigen gamma chain	34472	29688.8	197367	29922	2.02341e-12	8.91512e-10	0.150962	8.90332e-12	0.18302	3.59057e-12	0.999294	3.72702e-12	1.16111	0.174659	1.15206	0.150424	0.992206	6.59605
Q53EL6	PDCD4_HUMAN	PDCD4	Programmed cell death protein 4	521571	944650	1.67717e+06	5.12796e+06	9.29279e-15	2.0472e-11	4.7384e-08	9.22629e-12	3.93019e-14	7.0224e-08	4.68847e-13	1.83813e-11	0.552131	0.310984	0.101711	0.563242	0.184216	0.327063
O00468	AGRIN_HUMAN	AGRN	Agrin	348227	484814	500395	468046	1.96185e-11	7.20325e-09	8.25651e-11	1.99512e-11	4.04535e-10	0.163387	0.106869	0.00219925	0.718269	0.695905	0.744003	0.968864	1.03583	1.06912
Q9UPQ0	LIMC1_HUMAN	LIMCH1	LIM and calponin homology domains-containing protein 1	709109	890374	994239	986212	3.54842e-11	1.01963e-08	7.25922e-09	5.1805e-11	7.53583e-11	1.94419e-05	4.16235e-05	0.935053	0.796417	0.713218	0.719023	0.895533	0.902822	1.00814
O00469	PLOD2_HUMAN	PLOD2	Procollagen-lysine,2-oxoglutarate 5-dioxygenase 2	1.01038e+06	1.30186e+06	1.42648e+06	1.4994e+06	1.07836e-10	2.63959e-08	2.07726e-08	6.79749e-10	1.06873e-10	0.000816972	1.24397e-05	0.0495183	0.7761	0.708298	0.673854	0.912637	0.868256	0.95137
Q9UBU8	MO4L1_HUMAN	MORF4L1	Mortality factor 4-like protein 1	273848	342668	449615	468739	1.78728e-10	3.81037e-08	6.84395e-06	1.07602e-09	3.98278e-10	8.76147e-07	1.79592e-07	0.387924	0.799164	0.609073	0.584223	0.762137	0.731042	0.9592
P17405	ASM_HUMAN	SMPD1	Sphingomyelin phosphodiesterase	30149.3	95084.5	103180	160939	1.00529e-10	2.55537e-08	5.96663e-09	2.72678e-09	5.1802e-11	0.602764	2.85925e-05	0.000162848	0.317079	0.2922	0.187333	0.921536	0.59081	0.641114
P20908	CO5A1_HUMAN	COL5A1	Collagen alpha-1(V) chain	571663	840535	999690	1.10887e+06	5.5028e-10	9.57052e-08	2.69571e-07	4.15813e-09	6.11438e-10	0.000816932	9.38167e-06	0.0331389	0.680118	0.57184	0.515536	0.840796	0.758009	0.901538
P84101	SERF2_HUMAN	SERF2	Small EDRK-rich factor 2	790235	1.12933e+06	1.44488e+06	2.10647e+06	2.27962e-11	7.53301e-09	1.49999e-06	4.25634e-09	6.58096e-12	6.61647e-05	2.94865e-09	8.07836e-07	0.699738	0.546921	0.375146	0.781608	0.536123	0.685924
P35555	FBN1_HUMAN	FBN1	Fibrillin-1	393681	601381	596488	728683	6.97241e-11	1.84323e-08	3.55305e-09	4.43187e-09	2.63798e-11	0.983649	2.08254e-05	1.32932e-05	0.654628	0.659999	0.540263	1.0082	0.825298	0.818583
Q01664	TFAP4_HUMAN	TFAP4	Transcription factor AP-4	33761.1	67045.1	78661.8	95662.4	4.30045e-10	8.12048e-08	4.54711e-08	4.43255e-09	4.09394e-10	0.0308505	5.46753e-05	0.00872067	0.503558	0.429193	0.352919	0.852321	0.700852	0.822286
Q9H6Y7	RN167_HUMAN	RNF167	E3 ubiquitin-protein ligase RNF167	34126.5	121749	126301	125174	1.18025e-09	1.77279e-07	6.4297e-09	4.90022e-09	5.08453e-09	0.973425	0.982604	0.999925	0.280302	0.2702	0.272634	0.963963	0.972644	1.00901
Q6ZN18	AEBP2_HUMAN	AEBP2	Zinc finger protein AEBP2	34651.2	91247.4	92774.4	97960.7	1.0587e-09	1.66594e-07	6.82173e-09	5.81318e-09	3.19229e-09	0.994497	0.635018	0.773967	0.37975	0.3735	0.353726	0.983542	0.93147	0.947057
Q14118	DAG1_HUMAN	DAG1	Dystroglycan 1	541263	731376	927299	972842	1.83126e-09	2.42056e-07	5.13047e-06	7.9081e-09	3.14578e-09	5.38192e-05	8.41641e-06	0.493163	0.74006	0.583698	0.556373	0.788717	0.751794	0.953185
Q8IXB1	DJC10_HUMAN	DNAJC10	DnaJ homolog subfamily C member 10	312649	421081	430702	461241	8.25025e-10	1.3299e-07	1.92501e-08	8.56254e-09	1.01538e-09	0.674997	0.0029095	0.0207735	0.742492	0.725905	0.677843	0.977661	0.91293	0.933791
P49441	INPP_HUMAN	INPP1	Inositol polyphosphate 1-phosphatase	34451.8	81558.6	121252	100430	8.31637e-09	7.96564e-07	5.95085e-07	8.64783e-09	5.71547e-08	0.00133732	0.0962952	0.111329	0.422418	0.284134	0.343044	0.672637	0.812096	1.20733
P37268	FDFT_HUMAN	FDFT1	Squalene synthase	333877	430061	544411	771047	3.42431e-11	1.01963e-08	1.62456e-05	1.20464e-08	1.20484e-11	3.39162e-05	1.78644e-09	5.73217e-07	0.776347	0.61328	0.433017	0.789956	0.557763	0.706068
Q6UX71	PXDC2_HUMAN	PLXDC2	Plexin domain-containing protein 2	86549.3	124322	170778	200246	1.33446e-09	1.91726e-07	1.75819e-05	1.61059e-08	1.60541e-09	5.34978e-05	7.95274e-07	0.0167841	0.696168	0.506795	0.432214	0.727978	0.620848	0.852838
Q92626	PXDN_HUMAN	PXDN	Peroxidasin homolog	191671	246077	287346	358639	2.74171e-10	5.4909e-08	5.24847e-06	2.5108e-08	1.53697e-10	0.000543224	5.80751e-08	1.85768e-05	0.778908	0.66704	0.53444	0.856378	0.68614	0.801212
Q15014	MO4L2_HUMAN	MORF4L2	Mortality factor 4-like protein 2	592670	632653	844286	770741	1.46003e-08	1.17674e-06	0.0793889	2.92356e-08	7.99169e-07	2.9947e-07	1.66826e-05	0.0137853	0.936802	0.701979	0.768962	0.749335	0.820838	1.09542
Q99715	COCA1_HUMAN	COL12A1	Collagen alpha-1(XII) chain	392566	574136	619448	581426	2.10226e-08	1.52679e-06	2.37856e-07	3.03835e-08	1.66719e-07	0.129545	0.97906	0.236609	0.68375	0.633735	0.675178	0.926851	0.987463	1.06539
Q00653	NFKB2_HUMAN	NFKB2	Nuclear factor NF-kappa-B p100 subunit	649238	595672	492249	297900	1.37767e-13	1.30072e-10	0.00350679	3.1255e-08	3.77032e-13	1.99734e-06	9.35474e-13	1.77245e-11	1.08993	1.31892	2.17938	1.2101	1.99957	1.6524
Q8IW52	SLIK4_HUMAN	SLITRK4	SLIT and NTRK-like protein 4	31710.5	1.53615e+06	1.3979e+06	1.10384e+06	9.47174e-09	8.69427e-07	2.31796e-08	3.60641e-08	9.93755e-08	0.940771	0.329845	0.630826	0.0206428	0.0226844	0.0287275	1.0989	1.39165	1.2664
P05231	IL6_HUMAN	IL6	Interleukin-6	93413.8	56364.1	30168.2	28817.4	9.9498e-09	8.97543e-07	0.000179068	3.73982e-08	2.41311e-08	2.38705e-05	1.18422e-05	0.942791	1.65733	3.09643	3.24158	1.86833	1.95591	1.04688
P61077	UB2D3_HUMAN	UBE2D3	Ubiquitin-conjugating enzyme E2 D3	33014.5	1.85993e+06	2.30471e+06	2.5096e+06	1.22084e-08	1.02133e-06	1.29917e-07	4.11552e-08	3.27794e-08	0.548713	0.395377	0.991617	0.0177504	0.0143248	0.0131553	0.807013	0.741128	0.918359
Q15004	PAF15_HUMAN	PCLAF	PCNA-associated factor	506156	712854	790378	1.03979e+06	3.47321e-10	6.7513e-08	8.34679e-07	4.23675e-08	1.59066e-10	0.0288511	2.72868e-07	8.79181e-06	0.710041	0.640397	0.486786	0.901915	0.685575	0.760132
Q8IVF2	AHNK2_HUMAN	AHNAK2	Protein AHNAK2	1.41665e+06	1.81687e+06	2.11304e+06	2.31959e+06	4.47341e-09	4.76851e-07	7.99562e-06	4.44117e-08	4.32516e-09	0.00096091	9.96853e-06	0.0302949	0.779719	0.670431	0.610732	0.859838	0.783273	0.910954
Q6NTF9	RHBD2_HUMAN	RHBDD2	Rhomboid domain-containing protein 2	32369.3	170549	214147	212264	1.87864e-08	1.40307e-06	2.75707e-07	5.07884e-08	5.27577e-08	0.269055	0.287133	0.999963	0.189794	0.151155	0.152496	0.796413	0.803479	1.00887
Q9Y6Y0	NS1BP_HUMAN	IVNS1ABP	Influenza virus NS1A-binding protein	279749	334250	400827	364710	8.53821e-08	4.62533e-06	0.000100347	5.78601e-08	1.67473e-06	8.37829e-05	0.0266864	0.0173024	0.836943	0.697929	0.767045	0.833902	0.916483	1.09903
O15230	LAMA5_HUMAN	LAMA5	Laminin subunit alpha-5	429965	620253	669979	754098	5.12995e-09	5.29748e-07	5.24216e-07	5.99784e-08	4.32024e-09	0.13078	0.000304837	0.0159714	0.693209	0.641758	0.570171	0.925779	0.822509	0.888451
Q8NBJ4	GOLM1_HUMAN	GOLM1	Golgi membrane protein 1	239763	343397	369791	392796	1.27187e-08	1.05072e-06	5.57348e-07	6.82695e-08	1.57142e-08	0.151383	0.00622587	0.295083	0.698208	0.648374	0.6104	0.928625	0.874238	0.941433
Q14126	DSG2_HUMAN	DSG2	Desmoglein-2	795810	945974	1.05702e+06	1.08705e+06	1.69729e-08	1.33541e-06	1.53982e-05	6.9719e-08	2.36634e-08	0.000970525	0.000126904	0.558513	0.84126	0.752883	0.732083	0.894946	0.870222	0.972373
Q02809	PLOD1_HUMAN	PLOD1	Procollagen-lysine,2-oxoglutarate 5-dioxygenase 1	2.07105e+06	2.68906e+06	3.10856e+06	3.01113e+06	5.71336e-08	3.31225e-06	9.98333e-06	8.14625e-08	2.01028e-07	0.00233058	0.0134395	0.740941	0.770177	0.666242	0.6878	0.86505	0.893041	1.03236
O43854	EDIL3_HUMAN	EDIL3	EGF-like repeat and discoidin I-like domain-containing protein 3	524338	695955	703833	568419	4.3151e-08	2.63379e-06	2.80145e-07	1.83607e-07	0.0242434	0.966656	1.0258e-05	5.93746e-06	0.753409	0.744975	0.92245	0.988806	1.22437	1.23823
Q9Y605	MOFA1_HUMAN	MRFAP1	MORF4 family-associated protein 1	122064	249243	372625	337781	1.45379e-07	7.06478e-06	2.59856e-05	1.95655e-07	5.47615e-07	0.00342177	0.0225728	0.702924	0.489738	0.327578	0.361369	0.668883	0.737882	1.10315
P98160	PGBM_HUMAN	HSPG2	Basement membrane-specific heparan sulfate proteoglycan core protein	378481	565085	549974	436821	3.52707e-08	2.30796e-06	9.06028e-08	1.99613e-07	0.0025806	0.81047	1.07751e-05	3.32812e-05	0.669777	0.68818	0.866443	1.02748	1.29363	1.25904
P32004	L1CAM_HUMAN	L1CAM	Neural cell adhesion molecule L1	1.23736e+06	1.59565e+06	1.78519e+06	1.59561e+06	3.22302e-07	1.30681e-05	1.11396e-05	2.07447e-07	1.07389e-05	0.0121942	0.99999	0.0128507	0.775458	0.693127	0.775478	0.893829	1.00003	1.11881
Q14554	PDIA5_HUMAN	PDIA5	Protein disulfide-isomerase A5	209749	365387	402059	374105	1.24635e-07	6.24024e-06	1.22491e-06	2.10678e-07	7.68065e-07	0.318288	0.9672	0.552449	0.574046	0.521688	0.560669	0.908792	0.976697	1.07472
Q9UK59	DBR1_HUMAN	DBR1	Lariat debranching enzyme	224599	283624	300457	325548	1.91385e-08	1.4054e-06	2.51968e-06	2.30299e-07	1.46029e-08	0.134081	0.00048427	0.026403	0.79189	0.747522	0.68991	0.943973	0.87122	0.922929
P42892	ECE1_HUMAN	ECE1	Endothelin-converting enzyme 1	883497	1.10823e+06	1.37031e+06	1.45204e+06	4.13248e-08	2.57656e-06	0.000240858	2.4604e-07	5.91963e-08	0.00038571	3.82254e-05	0.405652	0.797215	0.644741	0.608454	0.808742	0.763224	0.943718
Q6YHK3	CD109_HUMAN	CD109	CD109 antigen	275202	399425	407911	413209	6.52175e-08	3.71571e-06	4.89945e-07	2.6063e-07	1.781e-07	0.908845	0.708845	0.9749	0.688995	0.674661	0.66601	0.979196	0.96664	0.987178
Q9P2B2	FPRP_HUMAN	PTGFRN	Prostaglandin F2 receptor negative regulator	437891	565583	610699	656438	3.41522e-08	2.25915e-06	4.83159e-06	2.74541e-07	3.02439e-08	0.070312	0.000887002	0.099654	0.774231	0.717033	0.667072	0.926123	0.861593	0.930323
O15294	OGT1_HUMAN	OGT	UDP-N-acetylglucosamine--peptide N-acetylglucosaminyltransferase 110 kDa subunit	722958	950331	981172	1.02874e+06	4.34383e-08	2.63379e-06	9.43227e-07	2.80773e-07	5.50265e-08	0.614892	0.0407445	0.299919	0.760743	0.736831	0.702762	0.968567	0.923783	0.953762
P52789	HXK2_HUMAN	HK2	Hexokinase-2	1.61587e+06	1.48853e+06	1.38438e+06	1.0152e+06	9.84609e-13	4.64806e-10	0.00021501	3.24193e-07	1.09657e-12	0.000687048	4.51161e-12	9.2064e-11	1.08555	1.16721	1.59169	1.07523	1.46625	1.36366
O60566	BUB1B_HUMAN	BUB1B	Mitotic checkpoint serine/threonine-protein kinase BUB1 beta	229050	259420	298596	422357	2.74874e-11	8.65069e-09	0.000677857	3.35503e-07	1.14113e-11	0.000229787	3.45262e-10	1.67182e-08	0.88293	0.767091	0.542313	0.868801	0.61422	0.706974
P54826	GAS1_HUMAN	GAS1	Growth arrest-specific protein 1	51225.8	102102	116855	210456	1.76669e-09	2.38287e-07	2.41233e-06	3.48552e-07	9.02221e-10	0.279075	1.66976e-06	1.49143e-05	0.501711	0.438369	0.243404	0.873748	0.485148	0.555249
Q7KZ85	SPT6H_HUMAN	SUPT6H	Transcription elongation factor SPT6	442632	529203	558816	536493	3.26265e-07	1.31436e-05	6.26412e-06	3.51664e-07	2.84537e-06	0.0751858	0.898342	0.227749	0.836412	0.792089	0.825046	0.947009	0.986412	1.04161
Q92817	EVPL_HUMAN	EVPL	Envoplakin	191470	230345	282581	295635	6.26992e-08	3.6033e-06	0.000635276	3.58085e-07	1.03866e-07	0.000270752	3.95375e-05	0.546117	0.831231	0.677574	0.647655	0.815145	0.779151	0.955845
Q13217	DNJC3_HUMAN	DNAJC3	DnaJ homolog subfamily C member 3	398050	514960	511386	417903	4.00882e-08	2.54753e-06	2.69343e-07	3.65393e-07	0.169401	0.987716	2.57957e-06	3.70048e-06	0.772973	0.778376	0.952495	1.00699	1.23225	1.2237
Q13162	PRDX4_HUMAN	PRDX4	Peroxiredoxin-4	1.06924e+06	1.47258e+06	1.68548e+06	1.57101e+06	3.86518e-07	1.48517e-05	1.79131e-05	4.00672e-07	2.48864e-06	0.0213693	0.376984	0.328224	0.726101	0.634384	0.680612	0.873686	0.937352	1.07287
P50897	PPT1_HUMAN	PPT1	Palmitoyl-protein thioesterase 1	528376	701687	874579	942105	7.14546e-08	4.00097e-06	0.000164286	4.22783e-07	8.94233e-08	0.00144283	0.000106446	0.362981	0.753008	0.604149	0.560847	0.802314	0.744808	0.928324
P10586	PTPRF_HUMAN	PTPRF	Receptor-type tyrosine-protein phosphatase F	179938	220384	291278	346416	1.20781e-08	1.02133e-06	0.00220204	4.43019e-07	1.33269e-08	0.000121717	8.17853e-07	0.006312	0.816475	0.617753	0.519426	0.75661	0.636181	0.840832
Q9Y4B6	DCAF1_HUMAN	DCAF1	DDB1- and CUL4-associated factor 1	137957	198903	207427	229161	4.47424e-08	2.6497e-06	1.56786e-06	4.65648e-07	4.08106e-08	0.64004	0.00918095	0.0737001	0.693588	0.665086	0.602009	0.958906	0.867962	0.905159
P30533	AMRP_HUMAN	LRPAP1	Alpha-2-macroglobulin receptor-associated protein	424417	720893	773205	825109	1.2759e-07	6.34015e-06	2.24147e-06	5.85288e-07	2.06298e-07	0.58254	0.131333	0.69742	0.588739	0.548906	0.514377	0.932343	0.873694	0.937095
Q01082	SPTB2_HUMAN	SPTBN1	Spectrin beta chain, non-erythrocytic 1	2.06334e+06	2.57734e+06	2.76564e+06	2.68764e+06	4.25545e-07	1.6071e-05	1.191e-05	6.04817e-07	1.82907e-06	0.0783495	0.39856	0.710784	0.800569	0.74606	0.767712	0.931912	0.958957	1.02902
O43299	AP5Z1_HUMAN	AP5Z1	AP-5 complex subunit zeta-1	30808.8	100927	165787	190126	1.97917e-07	8.83804e-06	2.74127e-05	6.71812e-07	2.85902e-07	0.0301602	0.0064362	0.81285	0.305257	0.185833	0.162044	0.608775	0.530842	0.871984
P13051	UNG_HUMAN	UNG	Uracil-DNA glycosylase	126894	144153	183247	221948	5.59442e-09	5.68824e-07	0.0117109	7.26147e-07	6.61314e-09	6.26184e-05	1.23959e-07	0.000511653	0.880273	0.692472	0.571728	0.786656	0.649489	0.825633
Q9GZY8	MFF_HUMAN	MFF	Mitochondrial fission factor	430953	642208	704337	644964	6.19052e-07	2.07681e-05	6.89488e-06	7.37599e-07	6.09801e-06	0.222927	0.999569	0.259693	0.671049	0.611856	0.668181	0.911791	0.995726	1.09206
Q8IVL5	P3H2_HUMAN	P3H2	Prolyl 3-hydroxylase 2	223492	278019	310650	266723	1.44147e-06	4.03674e-05	5.71899e-05	7.65101e-07	0.000427251	0.014402	0.531097	0.00136282	0.803875	0.719436	0.837919	0.89496	1.04235	1.16469
O00273	DFFA_HUMAN	DFFA	DNA fragmentation factor subunit alpha	836606	1.19304e+06	1.52925e+06	2.14128e+06	8.48831e-09	8.01418e-07	0.000173127	7.78202e-07	5.48366e-09	0.00382271	1.12379e-06	0.000295526	0.701242	0.54707	0.390703	0.780145	0.557159	0.714174
Q8N3R9	PALS1_HUMAN	PALS1	Protein PALS1	132527	151822	185142	173645	7.3309e-07	2.38669e-05	0.00438921	8.14709e-07	7.964e-06	0.000164341	0.00445084	0.215538	0.872911	0.715815	0.763209	0.820032	0.874326	1.06621
P55145	MANF_HUMAN	MANF	Mesencephalic astrocyte-derived neurotrophic factor	950749	1.61832e+06	1.67284e+06	1.74846e+06	1.86473e-07	8.52787e-06	1.68716e-06	8.77629e-07	3.84566e-07	0.921176	0.486531	0.83602	0.58749	0.568345	0.543765	0.967411	0.925573	0.956752
P05067	A4_HUMAN	APP	Amyloid-beta precursor protein	238951	290662	350664	344113	4.81378e-07	1.74804e-05	0.000740157	8.82331e-07	1.56582e-06	0.000968926	0.00239669	0.944158	0.822091	0.681425	0.694396	0.828892	0.844671	1.01904
Q96GN5	CDA7L_HUMAN	CDCA7L	Cell division cycle-associated 7-like protein	184262	216752	260739	332214	3.36432e-09	4.04269e-07	0.00177334	1.02589e-06	2.80991e-09	0.000520934	9.84727e-08	4.31578e-05	0.850105	0.706693	0.554648	0.831301	0.652447	0.78485
Q8IVL6	P3H3_HUMAN	P3H3	Prolyl 3-hydroxylase 3	567071	679823	719120	731013	3.1751e-07	1.29532e-05	1.84179e-05	1.02779e-06	4.94742e-07	0.105175	0.0301276	0.883012	0.834146	0.788563	0.775733	0.945354	0.929974	0.983731
Q92791	SC65_HUMAN	P3H4	Endoplasmic reticulum protein SC65	414836	529638	560455	588636	1.871e-07	8.52787e-06	9.76248e-06	1.10601e-06	2.03574e-07	0.260744	0.0142191	0.345396	0.783245	0.740178	0.704742	0.945014	0.899772	0.952125
P42568	AF9_HUMAN	MLLT3	Protein AF-9	31637.3	48390.2	71732.5	72534.6	4.52373e-07	1.66096e-05	0.000949167	1.17963e-06	1.07248e-06	0.00118869	0.00102445	0.999705	0.653796	0.441046	0.436169	0.674592	0.667132	0.988941
Q14677	EPN4_HUMAN	CLINT1	Clathrin interactor 1	806895	952425	998666	1.10927e+06	2.5412e-08	1.73142e-06	1.75548e-05	1.20055e-06	1.34685e-08	0.142786	3.84677e-05	0.0012187	0.847201	0.807974	0.727411	0.953698	0.858606	0.900291
P12259	FA5_HUMAN	F5	Coagulation factor V	402687	287586	218466	124630	1.21658e-09	1.78675e-07	0.000513277	1.33128e-06	8.75492e-10	0.00273702	3.6367e-08	2.88966e-06	1.40023	1.84325	3.23106	1.31639	2.30752	1.75292
Q07954	LRP1_HUMAN	LRP1	Prolow-density lipoprotein receptor-related protein 1	189679	242402	267998	389376	6.87179e-10	1.1645e-07	4.84527e-05	1.40003e-06	3.78073e-10	0.049722	4.39855e-08	6.38761e-07	0.782497	0.707763	0.487136	0.904494	0.62254	0.688275
P36941	TNR3_HUMAN	LTBR	Tumor necrosis factor receptor superfamily member 3	51782	72147.8	98617.7	70668.6	3.3093e-06	7.62061e-05	0.00113548	1.47217e-06	0.00171636	0.00139954	0.994022	0.000929421	0.717721	0.525078	0.732744	0.731591	1.02093	1.3955
Q9H078	CLPB_HUMAN	CLPB	Caseinolytic peptidase B protein homolog	865247	973374	1.13021e+06	1.10083e+06	9.85682e-07	2.98824e-05	0.00368536	1.57519e-06	4.92258e-06	0.000500192	0.00264522	0.736021	0.888915	0.765561	0.785993	0.861231	0.884216	1.02669
Q12841	FSTL1_HUMAN	FSTL1	Follistatin-related protein 1	280117	521221	552356	612249	2.64797e-07	1.11468e-05	4.07603e-06	1.63343e-06	3.63858e-07	0.838937	0.147086	0.471411	0.537425	0.507131	0.457521	0.943632	0.851322	0.902175
Q6ZRP7	QSOX2_HUMAN	QSOX2	Sulfhydryl oxidase 2	130284	128228	196870	226677	8.66928e-09	8.06975e-07	0.969214	1.65433e-06	6.27666e-08	1.03741e-06	4.34122e-08	0.0209363	1.01603	0.661778	0.574758	0.651336	0.565688	0.868505
P36551	HEM6_HUMAN	CPOX	Oxygen-dependent coproporphyrinogen-III oxidase, mitochondrial	341980	427691	511398	494686	1.21957e-06	3.5204e-05	0.000587349	1.74529e-06	4.37983e-06	0.0036435	0.0153602	0.83851	0.799595	0.668715	0.691307	0.836317	0.864571	1.03378
Q9Y2B0	CNPY2_HUMAN	CNPY2	Protein canopy homolog 2	495238	767854	855724	1.01361e+06	1.31881e-07	6.46705e-06	1.89204e-05	1.77341e-06	9.42408e-08	0.230356	0.0013164	0.0429544	0.644964	0.578736	0.488586	0.897315	0.75754	0.84423
Q14687	GSE1_HUMAN	GSE1	Genetic suppressor element 1	39695.5	61868	72706.5	101470	2.52272e-08	1.73142e-06	4.58266e-05	1.80672e-06	1.30659e-08	0.0803972	1.41313e-05	0.000613801	0.641615	0.545968	0.391203	0.850928	0.609717	0.716532
P49593	PPM1F_HUMAN	PPM1F	Protein phosphatase 1F	34148.6	95595.8	108436	94425.5	1.14445e-06	3.36163e-05	8.58004e-06	1.89124e-06	7.65747e-06	0.562403	0.999673	0.61771	0.357218	0.314919	0.361646	0.881586	1.01239	1.14838
Q13309	SKP2_HUMAN	SKP2	S-phase kinase-associated protein 2	563497	642839	736915	688774	2.65046e-06	6.34669e-05	0.00170406	1.91149e-06	3.82203e-05	0.00139131	0.101498	0.10997	0.876575	0.764669	0.818115	0.872337	0.933309	1.06989
O00461	GOLI4_HUMAN	GOLIM4	Golgi integral membrane protein 4	650782	935027	1.00942e+06	1.11321e+06	2.38803e-07	1.03153e-05	1.48819e-05	1.92035e-06	2.17978e-07	0.334742	0.00890132	0.180936	0.696004	0.644707	0.584598	0.926298	0.839936	0.906766
Q96HE7	ERO1A_HUMAN	ERO1A	ERO1-like protein alpha	527363	789548	815510	825449	5.41972e-07	1.88521e-05	4.21319e-06	1.947e-06	1.41823e-06	0.8967	0.75602	0.990387	0.667931	0.646667	0.63888	0.968164	0.956507	0.987959
Q9NVP2	ASF1B_HUMAN	ASF1B	Histone chaperone ASF1B	53986.6	88269.9	116524	180098	2.34101e-08	1.66363e-06	0.00017918	1.94804e-06	1.33833e-08	0.0168735	4.6128e-06	0.000579657	0.611608	0.463309	0.299763	0.757526	0.490123	0.647005
Q6UVK1	CSPG4_HUMAN	CSPG4	Chondroitin sulfate proteoglycan 4	394312	500017	570971	594777	5.18093e-07	1.82367e-05	0.000190362	2.11522e-06	6.67244e-07	0.0179379	0.00264375	0.6904	0.788598	0.6906	0.662959	0.875731	0.84068	0.959975
Q8WXI7	MUC16_HUMAN	MUC16	Mucin-16	178056	228149	307440	478732	3.54234e-09	4.07652e-07	0.00419264	2.18789e-06	3.01996e-09	0.000717439	7.02847e-08	1.9792e-05	0.780438	0.579158	0.371933	0.742093	0.47657	0.642197
Q9H9B1	EHMT1_HUMAN	EHMT1	Histone-lysine N-methyltransferase EHMT1	276040	324583	333035	333231	8.45818e-07	2.66191e-05	1.06765e-05	2.24052e-06	2.20922e-06	0.548497	0.541095	0.999999	0.850445	0.828863	0.828376	0.974622	0.97405	0.999413
P21980	TGM2_HUMAN	TGM2	Protein-glutamine gamma-glutamyltransferase 2	914519	737897	675798	527071	5.84386e-09	5.85183e-07	8.38753e-05	2.40894e-06	3.12132e-09	0.0597054	7.4768e-07	1.89623e-05	1.23936	1.35324	1.7351	1.09189	1.4	1.28218
P19022	CADH2_HUMAN	CDH2	Cadherin-2	1.00209e+06	1.25045e+06	1.38107e+06	1.32517e+06	2.1496e-06	5.45388e-05	0.000112325	2.41408e-06	1.03813e-05	0.0419228	0.316665	0.601383	0.801384	0.725591	0.756201	0.905423	0.94362	1.04219
P62253	UB2G1_HUMAN	UBE2G1	Ubiquitin-conjugating enzyme E2 G1	38580.2	75211	74729.3	86487.8	2.14057e-07	9.43135e-06	2.1653e-06	2.53186e-06	2.5702e-07	0.998895	0.200578	0.160786	0.512959	0.516266	0.446076	1.00645	0.869614	0.864044
P07996	TSP1_HUMAN	THBS1	Thrombospondin-1	1.25135e+06	1.93694e+06	1.0005e+06	601610	2.31353e-14	2.96208e-11	1.56829e-09	2.53197e-06	2.16027e-12	5.1954e-12	5.39568e-14	2.34144e-10	0.646046	1.25072	2.08	1.93596	3.21959	1.66304
P18847	ATF3_HUMAN	ATF3	Cyclic AMP-dependent transcription factor ATF-3	229957	119923	108737	28336.7	3.74211e-11	1.03048e-08	1.2022e-05	2.76552e-06	1.11056e-11	0.603404	1.88499e-09	4.03068e-09	1.91755	2.1148	8.11517	1.10287	4.23206	3.83733
O75976	CBPD_HUMAN	CPD	Carboxypeptidase D	202832	248387	277727	329603	3.68407e-08	2.38706e-06	0.000231123	2.77811e-06	2.0948e-08	0.022046	7.67821e-06	0.000907573	0.816599	0.73033	0.615384	0.894356	0.753594	0.842611
P30281	CCND3_HUMAN	CCND3	G1/S-specific cyclin-D3	43716.9	73092.5	110263	99270.1	2.27321e-06	5.69079e-05	0.00073896	2.8249e-06	9.34684e-06	0.00605253	0.0367964	0.733466	0.598104	0.396479	0.440383	0.662893	0.736299	1.11074
Q8N0T1	RBIS_HUMAN	RBIS	Ribosomal biogenesis factor	45113.5	111322	124000	137211	6.48188e-07	2.14194e-05	9.20694e-06	2.85806e-06	1.07903e-06	0.746214	0.270062	0.799782	0.405254	0.363817	0.328788	0.897752	0.811315	0.903718
P50454	SERPH_HUMAN	SERPINH1	Serpin H1	3.64877e+06	5.61903e+06	6.40213e+06	5.94732e+06	2.29905e-06	5.69079e-05	4.22535e-05	2.85818e-06	1.28473e-05	0.175729	0.791906	0.589344	0.649359	0.56993	0.613515	0.877682	0.944801	1.07647
Q14696	MESD_HUMAN	MESD	LRP chaperone MESD	1.4968e+06	2.21609e+06	2.32522e+06	2.22217e+06	1.58762e-06	4.31793e-05	1.01794e-05	2.94822e-06	9.70423e-06	0.715536	0.999977	0.73762	0.675424	0.643725	0.673577	0.953068	0.997265	1.04637
Q6P4E1	GOLM2_HUMAN	GOLM2	Protein GOLM2	273848	379172	395404	394062	1.08469e-06	3.21467e-05	1.02101e-05	2.98609e-06	3.10864e-06	0.720614	0.740767	0.999982	0.722226	0.692576	0.694934	0.958947	0.962212	1.00341
A3KN83	SBNO1_HUMAN	SBNO1	Protein strawberry notch homolog 1	142525	164531	185616	206364	9.23385e-08	4.88212e-06	0.00113061	3.00909e-06	7.12678e-08	0.00423195	1.41331e-05	0.0104171	0.866248	0.76785	0.690648	0.886409	0.797287	0.899457
Q15011	HERP1_HUMAN	HERPUD1	Homocysteine-responsive endoplasmic reticulum-resident ubiquitin-like domain member 1 protein	518942	271672	236856	110901	3.4965e-09	4.07652e-07	1.91787e-05	3.18537e-06	1.73269e-09	0.463585	8.45333e-07	4.27431e-06	1.91018	2.19096	4.67931	1.14699	2.44967	2.13574
Q9UNW1	MINP1_HUMAN	MINPP1	Multiple inositol polyphosphate phosphatase 1	145106	241690	236132	260694	2.9998e-07	1.2469e-05	2.00426e-06	3.25507e-06	4.4755e-07	0.970154	0.485026	0.275269	0.600381	0.614512	0.556616	1.02354	0.927104	0.905784
O95302	FKBP9_HUMAN	FKBP9	Peptidyl-prolyl cis-trans isomerase FKBP9	540660	814121	805347	920981	1.65462e-07	7.86718e-06	2.54467e-06	3.41806e-06	1.44779e-07	0.993106	0.0561853	0.0354786	0.664102	0.671337	0.587048	1.01089	0.883972	0.874445
Q12805	FBLN3_HUMAN	EFEMP1	EGF-containing fibulin-like extracellular matrix protein 1	216572	380138	308450	161752	1.53061e-10	3.4105e-08	2.07025e-08	3.5819e-06	2.65586e-05	0.000617247	1.56278e-10	4.57276e-09	0.569719	0.702131	1.33892	1.23242	2.35014	1.90693
O00622	CCN1_HUMAN	CCN1	CCN family member 1	1.25137e+06	1.00105e+06	767727	306184	2.15465e-11	7.49476e-09	0.00541424	3.8446e-06	1.09803e-11	0.00127539	1.50036e-10	3.32026e-09	1.25006	1.62997	4.08699	1.30392	3.26945	2.5074
Q6UXD5	SE6L2_HUMAN	SEZ6L2	Seizure 6-like protein 2	36825.4	75942.7	104506	129840	5.82988e-07	1.98607e-05	0.00018524	4.05402e-06	5.45046e-07	0.0514666	0.00193838	0.278343	0.48491	0.352377	0.283622	0.726686	0.584896	0.804881
Q8IWZ8	SUGP1_HUMAN	SUGP1	SURP and G-patch domain-containing protein 1	161086	186794	190471	198493	4.29517e-07	1.61288e-05	1.52421e-05	4.11231e-06	3.86724e-07	0.697417	0.0250866	0.160718	0.862373	0.845727	0.811545	0.980697	0.941061	0.959583
P17544	ATF7_HUMAN	ATF7	Cyclic AMP-dependent transcription factor ATF-7	195895	229368	268352	330636	2.14838e-08	1.54333e-06	0.00283402	4.21553e-06	1.52635e-08	0.00273673	8.49113e-07	0.000263646	0.854068	0.729995	0.59248	0.854727	0.693716	0.811623
Q5T1M5	FKB15_HUMAN	FKBP15	FK506-binding protein 15	734049	955430	1.0241e+06	1.1269e+06	3.6497e-07	1.43285e-05	4.59485e-05	4.26207e-06	2.72263e-07	0.271746	0.00302267	0.0833163	0.768291	0.716773	0.651386	0.932944	0.847837	0.908776
O43493	TGON2_HUMAN	TGOLN2	Trans-Golgi network integral membrane protein 2	122178	166604	182085	173351	3.2954e-06	7.61513e-05	5.45166e-05	4.31807e-06	1.70463e-05	0.23004	0.811253	0.670717	0.733345	0.670993	0.7048	0.914976	0.961075	1.05038
Q9NXW2	DJB12_HUMAN	DNAJB12	DnaJ homolog subfamily B member 12	177142	251589	258741	268840	9.16729e-07	2.84444e-05	9.67939e-06	4.39707e-06	1.59326e-06	0.906306	0.419212	0.794573	0.704094	0.684633	0.658914	0.97236	0.935832	0.962434
P17342	ANPRC_HUMAN	NPR3	Atrial natriuretic peptide receptor 3	169876	222513	258933	302524	2.33673e-07	1.01602e-05	0.000369741	4.73453e-06	1.63066e-07	0.0292169	0.000129699	0.0271158	0.763445	0.656062	0.56153	0.859343	0.735521	0.85591
Q4J6C6	PPCEL_HUMAN	PREPL	Prolyl endopeptidase-like	368262	453945	515121	602094	1.12899e-07	5.87521e-06	0.000467314	4.7657e-06	7.05973e-08	0.0226027	2.83529e-05	0.00505907	0.811249	0.714905	0.611636	0.88124	0.753943	0.855548
Q13123	RED_HUMAN	IK	Protein Red	928763	1.06957e+06	1.15464e+06	1.09744e+06	6.48817e-06	0.000128001	0.000344498	4.78757e-06	7.26655e-05	0.0322234	0.713064	0.192287	0.868354	0.804376	0.846301	0.926323	0.974604	1.05212
P09601	HMOX1_HUMAN	HMOX1	Heme oxygenase 1	1.40469e+06	1.46603e+06	2.07784e+06	1.94369e+06	1.18774e-06	3.47334e-05	0.797284	5.26442e-06	3.48855e-05	1.58705e-05	0.000123001	0.452548	0.958161	0.676036	0.722694	0.705556	0.754252	1.06902
Q9BRK5	CAB45_HUMAN	SDF4	45 kDa calcium-binding protein	471410	645477	784263	915489	3.81969e-07	1.48132e-05	0.000564191	5.31828e-06	3.02982e-07	0.0215886	0.000232827	0.073009	0.730328	0.601087	0.514927	0.823036	0.705062	0.85666
P11172	UMPS_HUMAN	UMPS	Uridine 5'-monophosphate synthase	657838	581734	579299	571720	9.97503e-07	2.99659e-05	7.61877e-06	5.34583e-06	1.87775e-06	0.990001	0.616311	0.786366	1.13082	1.13558	1.15063	1.0042	1.01752	1.01326
Q9NZ08	ERAP1_HUMAN	ERAP1	Endoplasmic reticulum aminopeptidase 1	109362	146354	157358	141784	6.42754e-06	0.000127184	5.38545e-05	5.81885e-06	0.000164114	0.335306	0.857172	0.100714	0.74724	0.694986	0.771326	0.93007	1.03223	1.10984
P19367	HXK1_HUMAN	HK1	Hexokinase-1	1.26118e+06	1.12074e+06	1.06158e+06	919393	1.52555e-08	1.21475e-06	0.000275288	6.43704e-06	7.90832e-09	0.0646623	1.45432e-06	4.14092e-05	1.12531	1.18801	1.37175	1.05572	1.219	1.15466
P29317	EPHA2_HUMAN	EPHA2	Ephrin type-A receptor 2	1.18046e+06	835258	751770	226048	2.56973e-12	1.06146e-09	8.85819e-05	6.45076e-06	1.81966e-12	0.228343	2.23572e-11	8.0987e-11	1.41328	1.57024	5.22215	1.11106	3.69505	3.32571
P54756	EPHA5_HUMAN	EPHA5	Ephrin type-A receptor 5	34254.1	46189.5	95108.6	97039.4	1.10576e-06	3.26249e-05	0.15316	6.45418e-06	5.266e-06	0.000128298	0.000100086	0.998015	0.741598	0.360157	0.352991	0.48565	0.475987	0.980103
Q9BT09	CNPY3_HUMAN	CNPY3	Protein canopy homolog 3	539608	776154	801821	863954	9.77818e-07	2.98173e-05	1.69682e-05	6.95635e-06	1.13833e-06	0.882969	0.137341	0.396742	0.695232	0.672978	0.624579	0.96799	0.898375	0.928083
Q9NRL3	STRN4_HUMAN	STRN4	Striatin-4	191253	256142	264504	275687	1.39927e-06	3.95204e-05	2.09656e-05	7.04034e-06	2.01704e-06	0.8115	0.24393	0.693439	0.746666	0.723062	0.693731	0.968386	0.929104	0.959435
P35221	CTNA1_HUMAN	CTNNA1	Catenin alpha-1	2.58107e+06	2.86765e+06	3.16359e+06	3.22566e+06	1.77145e-06	4.72077e-05	0.00330464	7.47247e-06	2.79922e-06	0.00540634	0.00128838	0.827072	0.900066	0.81587	0.800169	0.906455	0.889011	0.980756
Q14697	GANAB_HUMAN	GANAB	Neutral alpha-glucosidase AB	6.52432e+06	8.24302e+06	8.76109e+06	8.78572e+06	3.41665e-06	7.8405e-05	8.33675e-05	7.83827e-06	7.42131e-06	0.307261	0.288304	0.999963	0.791497	0.744693	0.742606	0.940867	0.93823	0.997197
Q9NP84	TNR12_HUMAN	TNFRSF12A	Tumor necrosis factor receptor superfamily member 12A	369101	218413	217695	115448	3.06337e-09	3.81997e-07	8.54403e-06	8.79352e-06	1.48729e-09	0.999995	1.27133e-06	1.23993e-06	1.68993	1.6955	3.19711	1.0033	1.89186	1.88565
Q96C01	F136A_HUMAN	FAM136A	Protein FAM136A	221803	308351	354989	362293	3.62565e-06	8.18449e-05	0.000297512	9.01039e-06	6.20456e-06	0.095462	0.0561082	0.988752	0.71932	0.624815	0.612218	0.868619	0.851108	0.979839
Q9BY42	RTF2_HUMAN	RTF2	Replication termination factor 2	4.87507e+06	5.71004e+06	6.67896e+06	7.90237e+06	1.18735e-07	6.08309e-06	0.00463625	9.22804e-06	8.89293e-08	0.00519865	6.93048e-06	0.00308502	0.853771	0.729914	0.616912	0.85493	0.722574	0.845185
P00742	FA10_HUMAN	F10	Coagulation factor X	314806	208041	145529	41665.2	2.10317e-10	4.34371e-08	0.00276484	9.3853e-06	1.5947e-10	0.00901974	2.65194e-09	4.0677e-08	1.51319	2.16318	7.55562	1.42955	4.99318	3.49283
P31040	SDHA_HUMAN	SDHA	Succinate dehydrogenase [ubiquinone] flavoprotein subunit, mitochondrial	3.64379e+06	4.10945e+06	4.96201e+06	4.7925e+06	5.55024e-06	0.000113918	0.0251934	9.42596e-06	3.07858e-05	0.0010569	0.00506813	0.784375	0.886686	0.734338	0.760312	0.828183	0.857476	1.03537
Q9BRR6	ADPGK_HUMAN	ADPGK	ADP-dependent glucokinase	255708	384161	397795	372113	5.27488e-06	0.000109284	2.21847e-05	9.51479e-06	4.80529e-05	0.902801	0.933994	0.599191	0.665629	0.642815	0.68718	0.965726	1.03238	1.06902
P28290	ITPI2_HUMAN	ITPRID2	Protein ITPRID2	414116	462674	576134	711231	4.05746e-08	2.55388e-06	0.0613859	1.00875e-05	4.41885e-08	0.000512409	5.69034e-07	0.000699652	0.89505	0.718785	0.582253	0.803067	0.650526	0.810051
Q9H5V8	CDCP1_HUMAN	CDCP1	CUB domain-containing protein 1	824453	689164	633325	443015	1.16698e-09	1.77279e-07	0.000417629	1.01022e-05	7.751e-10	0.0770237	3.43596e-08	3.69574e-07	1.19631	1.30178	1.861	1.08817	1.55562	1.42958
Q12802	AKP13_HUMAN	AKAP13	A-kinase anchor protein 13	483939	549275	598791	657881	2.94035e-07	1.22992e-05	0.00139662	1.01869e-05	2.01174e-07	0.0208643	5.53287e-05	0.0130725	0.88105	0.808193	0.735603	0.917306	0.834916	0.910182
P26885	FKBP2_HUMAN	FKBP2	Peptidyl-prolyl cis-trans isomerase FKBP2	1.62162e+06	2.56574e+06	3.18173e+06	3.05799e+06	7.97366e-06	0.000149286	0.000497406	1.15281e-05	2.36464e-05	0.0763902	0.192875	0.938628	0.632029	0.509666	0.53029	0.806396	0.839028	1.04047
Q9BZL1	UBL5_HUMAN	UBL5	Ubiquitin-like protein 5	488780	605981	774786	1.0103e+06	1.21178e-07	6.16051e-06	0.0101642	1.29424e-05	9.68482e-08	0.00384095	4.58e-06	0.0022868	0.806593	0.630858	0.483796	0.782127	0.599802	0.766886
O15460	P4HA2_HUMAN	P4HA2	Prolyl 4-hydroxylase subunit alpha-2	591728	805822	910336	860708	1.14555e-05	0.000196138	0.000312767	1.3349e-05	5.22946e-05	0.152665	0.611161	0.722957	0.734315	0.65001	0.68749	0.885192	0.936232	1.05766
P40763	STAT3_HUMAN	STAT3	Signal transducer and activator of transcription 3	274230	305726	369959	376239	3.02587e-06	7.09148e-05	0.0562961	1.48938e-05	8.4515e-06	0.000914712	0.000441495	0.965699	0.896979	0.741243	0.728871	0.826378	0.812584	0.983308
O60437	PEPL_HUMAN	PPL	Periplakin	471923	613682	638843	799000	8.71632e-08	4.68343e-06	6.21357e-05	1.50119e-05	3.87391e-08	0.704912	6.84753e-05	0.000329858	0.769003	0.738715	0.590643	0.960615	0.768063	0.799554
Q9UL15	BAG5_HUMAN	BAG5	BAG family molecular chaperone regulator 5	220530	305054	302247	294597	4.88268e-06	0.000103761	1.19707e-05	1.5877e-05	3.68512e-05	0.995618	0.814895	0.912508	0.722922	0.729636	0.748583	1.00929	1.0355	1.02597
Q9Y680	FKBP7_HUMAN	FKBP7	Peptidyl-prolyl cis-trans isomerase FKBP7	61770.9	231437	233142	266306	3.09627e-06	7.23083e-05	1.74195e-05	1.61623e-05	6.55496e-06	0.99992	0.852312	0.878181	0.266902	0.26495	0.231954	0.992688	0.869062	0.875464
P49454	CENPF_HUMAN	CENPF	Centromere protein F	201188	269099	284714	371389	7.20406e-08	4.00097e-06	8.7615e-05	1.62374e-05	3.18496e-08	0.597665	3.51754e-05	0.000207942	0.747633	0.70663	0.541717	0.945156	0.724575	0.76662
P13667	PDIA4_HUMAN	PDIA4	Protein disulfide-isomerase A4	2.55642e+06	3.44821e+06	3.48721e+06	2.92835e+06	7.92118e-06	0.000148896	2.57948e-05	1.70067e-05	0.0178287	0.987418	0.00563322	0.00322921	0.741376	0.733083	0.872989	0.988814	1.17753	1.19085
Q9NYU2	UGGG1_HUMAN	UGGT1	UDP-glucose:glycoprotein glucosyltransferase 1	734343	886915	916271	897965	1.0222e-05	0.000180152	8.75833e-05	1.73868e-05	4.51057e-05	0.629531	0.961401	0.882403	0.827974	0.801447	0.817785	0.967962	0.987694	1.02039
O00418	EF2K_HUMAN	EEF2K	Eukaryotic elongation factor 2 kinase	87092.2	117440	139694	213896	3.00395e-08	2.02583e-06	0.00128153	1.7709e-05	1.6453e-08	0.0498279	1.55213e-06	5.52219e-05	0.741591	0.623452	0.407171	0.840695	0.549051	0.653092
P48147	PPCE_HUMAN	PREP	Prolyl endopeptidase	400261	473310	505216	551146	9.95082e-07	2.99659e-05	0.000424773	1.8986e-05	6.3775e-07	0.173239	0.00102048	0.0452973	0.845663	0.792256	0.726234	0.936846	0.858774	0.916665
Q6WCQ1	MPRIP_HUMAN	MPRIP	Myosin phosphatase Rho-interacting protein	310907	348184	361745	311861	4.23279e-06	9.34718e-05	0.000318982	1.9134e-05	0.998538	0.232338	0.000405425	2.33909e-05	0.892939	0.859464	0.996941	0.962511	1.11647	1.15996
Q9H0U9	TSYL1_HUMAN	TSPYL1	Testis-specific Y-encoded-like protein 1	244658	273463	342932	388297	5.18762e-07	1.82367e-05	0.0842138	2.02168e-05	7.29338e-07	0.00092275	1.42511e-05	0.0524734	0.894665	0.71343	0.630079	0.797427	0.704262	0.883169
Q9Y294	ASF1A_HUMAN	ASF1A	Histone chaperone ASF1A	469779	585764	640553	908308	1.03213e-08	8.97543e-07	0.000518342	2.06497e-05	5.56586e-09	0.157066	5.53048e-07	6.41032e-06	0.801993	0.733396	0.517202	0.914467	0.644896	0.705215
Q86SF2	GALT7_HUMAN	GALNT7	N-acetylgalactosaminyltransferase 7	870842	1.09523e+06	1.1531e+06	1.09172e+06	1.85826e-05	0.00027912	0.000152171	2.09534e-05	0.000174146	0.491746	0.999699	0.441662	0.795124	0.755221	0.797677	0.949816	1.00321	1.05622
P18084	ITB5_HUMAN	ITGB5	Integrin beta-5	165696	207727	218754	167432	3.97125e-06	8.85224e-05	0.000166882	2.15214e-05	0.991532	0.46846	0.000254182	3.11228e-05	0.797661	0.757453	0.989631	0.949592	1.24067	1.30652
Q96AC1	FERM2_HUMAN	FERMT2	Fermitin family homolog 2	1.08673e+06	1.17369e+06	1.35623e+06	1.76824e+06	3.6392e-09	4.07652e-07	0.0763092	2.17711e-05	3.93441e-09	0.00111307	2.56991e-08	3.24748e-06	0.92591	0.801287	0.614582	0.865406	0.663761	0.766994
Q5JTJ3	COA6_HUMAN	COA6	Cytochrome c oxidase assembly factor 6 homolog	583296	712664	750526	787006	3.8587e-06	8.67419e-05	0.000208809	2.23068e-05	3.82601e-06	0.403275	0.040936	0.487839	0.818472	0.777183	0.741158	0.949554	0.905538	0.953646
Q15155	NOMO1_HUMAN	NOMO1	Nodal modulator 1	891443	981449	1.03295e+06	889778	6.20274e-06	0.000123849	0.00124198	2.30961e-05	0.99977	0.0735765	0.00108288	2.07238e-05	0.908293	0.863006	1.00187	0.950141	1.10303	1.16091
P11802	CDK4_HUMAN	CDK4	Cyclin-dependent kinase 4	377028	454134	501107	499564	1.2396e-05	0.000207406	0.00117715	2.33226e-05	2.60945e-05	0.0788058	0.0911905	0.99975	0.830212	0.75239	0.754713	0.906262	0.90906	1.00309
Q6UWN8	ISK6_HUMAN	SPINK6	Serine protease inhibitor Kazal-type 6	50518.2	105649	132581	184308	1.85699e-06	4.88957e-05	0.000284457	2.33484e-05	1.30632e-06	0.322545	0.00510992	0.113305	0.478171	0.381036	0.274097	0.796861	0.573219	0.719346
P56945	BCAR1_HUMAN	BCAR1	Breast cancer anti-estrogen resistance protein 1	266558	327691	377928	424163	1.5102e-06	4.15871e-05	0.00271315	2.35705e-05	1.19477e-06	0.0334677	0.000440704	0.0972016	0.813442	0.705314	0.628433	0.867073	0.77256	0.890997
Q03111	ENL_HUMAN	MLLT1	Protein ENL	150897	191777	228854	254658	2.40787e-06	5.91584e-05	0.00318626	2.3611e-05	2.21449e-06	0.0283943	0.000944888	0.241602	0.786838	0.659361	0.592548	0.837988	0.753075	0.898671
O95900	TRUB2_HUMAN	TRUB2	Pseudouridylate synthase TRUB2, mitochondrial	43907.9	63796.1	73144.6	74799.6	9.06502e-06	0.000165499	0.000467596	2.36511e-05	1.46121e-05	0.204968	0.112391	0.980426	0.688254	0.600289	0.587007	0.872191	0.852893	0.977874
Q9H488	OFUT1_HUMAN	POFUT1	GDP-fucose protein O-fucosyltransferase 1	243517	427005	506838	563277	5.2507e-06	0.000109284	0.000347491	2.394e-05	5.77426e-06	0.275896	0.0422776	0.662036	0.57029	0.480462	0.432321	0.842488	0.758073	0.899803
Q9NVM9	INT13_HUMAN	INTS13	Integrator complex subunit 13	192042	242080	253384	290473	6.23997e-07	2.08283e-05	0.000132771	2.41604e-05	3.33897e-07	0.609245	0.00122551	0.0101461	0.7933	0.757907	0.661135	0.955385	0.833399	0.872317
P30101	PDIA3_HUMAN	PDIA3	Protein disulfide-isomerase A3	1.82009e+07	2.33008e+07	2.32492e+07	2.07323e+07	1.0636e-05	0.000185471	2.28915e-05	2.43773e-05	0.00634017	0.999956	0.0134438	0.0146435	0.781126	0.78286	0.877897	1.00222	1.12389	1.1214
P33316	DUT_HUMAN	DUT	Deoxyuridine 5'-triphosphate nucleotidohydrolase, mitochondrial	3.35332e+06	4.73119e+06	5.16227e+06	5.9672e+06	1.72508e-06	4.63099e-05	0.000213928	2.46399e-05	1.16809e-06	0.434535	0.00589883	0.0885148	0.708769	0.649583	0.561959	0.916494	0.792866	0.865108
A6NDG6	PGP_HUMAN	PGP	Glycerol-3-phosphate phosphatase	3.26242e+06	4.2121e+06	4.99141e+06	5.53502e+06	2.74062e-06	6.49202e-05	0.00281797	2.49817e-05	2.51462e-06	0.0348089	0.0012826	0.26826	0.774535	0.653607	0.589415	0.84387	0.760991	0.901787
Q9UJV9	DDX41_HUMAN	DDX41	Probable ATP-dependent RNA helicase DDX41	353660	375156	398507	395561	1.49539e-05	0.000238146	0.0106201	2.5131e-05	4.74741e-05	0.00908168	0.0210845	0.961745	0.942701	0.887464	0.894073	0.941406	0.948417	1.00745
Q9H467	CUED2_HUMAN	CUEDC2	CUE domain-containing protein 2	60357.4	84122.3	118598	155353	7.93246e-07	2.53264e-05	0.0155165	2.57192e-05	7.30886e-07	0.00643264	5.07313e-05	0.0380665	0.717496	0.508926	0.388519	0.709308	0.541493	0.76341
P09496	CLCA_HUMAN	CLTA	Clathrin light chain A	3.81588e+06	2.99187e+06	2.17876e+06	1.26002e+06	1.86272e-08	1.40307e-06	0.0279722	2.7135e-05	1.52271e-08	0.00387937	2.35591e-07	3.07201e-05	1.27541	1.7514	3.02842	1.3732	2.37446	1.72914
O94880	PHF14_HUMAN	PHF14	PHD finger protein 14	227829	259502	292639	268701	4.90235e-05	0.000565438	0.00741953	2.72808e-05	0.00120622	0.0145403	0.707892	0.0941583	0.877945	0.778533	0.847889	0.886767	0.965765	1.08909
Q8IWD4	CC117_HUMAN	CCDC117	Coiled-coil domain-containing protein 117	42539.7	89320.5	104036	114976	7.26198e-06	0.000139519	0.000163094	2.76118e-05	1.01457e-05	0.586563	0.212619	0.85485	0.476259	0.408895	0.369988	0.858557	0.776864	0.904849
Q96SN8	CK5P2_HUMAN	CDK5RAP2	CDK5 regulatory subunit-associated protein 2	168245	191269	239217	248689	4.5077e-06	9.79981e-05	0.0641815	2.8243e-05	9.97193e-06	0.00182793	0.000484888	0.840349	0.879625	0.703317	0.67653	0.799565	0.769112	0.961913
P27797	CALR_HUMAN	CALR	Calreticulin	9.88514e+06	1.94343e+07	2.3328e+07	2.10888e+07	2.20259e-05	0.000315084	0.000333433	2.83485e-05	9.83783e-05	0.342512	0.838081	0.796721	0.508644	0.423745	0.468738	0.833089	0.921545	1.10618
P07237	PDIA1_HUMAN	P4HB	Protein disulfide-isomerase	1.25264e+07	1.76054e+07	1.72029e+07	1.61229e+07	9.33649e-06	0.000168416	1.40346e-05	2.92577e-05	0.000266086	0.937239	0.192118	0.427179	0.711506	0.728153	0.776929	1.0234	1.09195	1.06699
P98082	DAB2_HUMAN	DAB2	Disabled homolog 2	1.39226e+06	1.78472e+06	1.87989e+06	2.87842e+06	3.59099e-09	4.07652e-07	0.000182512	2.96083e-05	2.04001e-09	0.572984	2.24466e-07	7.94373e-07	0.780102	0.740611	0.483691	0.949376	0.620035	0.653097
P40692	MLH1_HUMAN	MLH1	DNA mismatch repair protein Mlh1	297694	330000	352128	405193	7.55778e-08	4.16245e-06	0.00247086	3.0293e-05	4.23629e-08	0.0515665	3.82537e-06	0.000171586	0.902102	0.845414	0.734697	0.93716	0.814428	0.869038
P35222	CTNB1_HUMAN	CTNNB1	Catenin beta-1	931873	1.14694e+06	1.29183e+06	1.33462e+06	8.75686e-06	0.000162112	0.00200708	3.03877e-05	1.15869e-05	0.0641357	0.0170649	0.870403	0.812483	0.721361	0.698229	0.887847	0.859376	0.967933
Q14562	DHX8_HUMAN	DHX8	ATP-dependent RNA helicase DHX8	191069	233555	241811	272396	7.40192e-07	2.39801e-05	0.000150124	3.07584e-05	3.90707e-07	0.667903	0.00139606	0.00978629	0.818092	0.790159	0.701438	0.965856	0.857407	0.887718
Q15293	RCN1_HUMAN	RCN1	Reticulocalbin-1	2.17388e+06	3.40256e+06	3.44695e+06	3.58969e+06	6.71714e-06	0.000130569	4.21679e-05	3.13007e-05	1.34495e-05	0.995769	0.811534	0.909149	0.638895	0.630668	0.605589	0.987123	0.94787	0.960235
Q9NZN8	CNOT2_HUMAN	CNOT2	CCR4-NOT transcription complex subunit 2	217832	244978	258905	275294	2.00307e-06	5.17121e-05	0.00120413	3.22938e-05	1.38248e-06	0.1167	0.00119725	0.081901	0.88919	0.84136	0.791272	0.946209	0.88988	0.940468
O75352	MPU1_HUMAN	MPDU1	Mannose-P-dolichol utilization defect 1 protein	1.28252e+06	732516	587590	578566	1.42989e-05	0.000230491	0.000459162	3.23012e-05	2.68969e-05	0.295324	0.241824	0.998962	1.75084	2.18268	2.21672	1.24665	1.26609	1.0156
Q969H8	MYDGF_HUMAN	MYDGF	Myeloid-derived growth factor	1.32182e+06	1.69175e+06	1.85993e+06	1.79241e+06	2.6072e-05	0.000356416	0.000685665	3.29258e-05	9.67379e-05	0.207848	0.574384	0.857491	0.781333	0.710682	0.737455	0.909576	0.943841	1.03767
O60313	OPA1_HUMAN	OPA1	Dynamin-like 120 kDa protein, mitochondrial	5.09057e+06	5.80014e+06	6.32923e+06	6.42215e+06	1.17669e-05	0.000199916	0.00333469	3.34684e-05	1.84489e-05	0.0432079	0.0193077	0.966152	0.877665	0.804296	0.792659	0.916405	0.903146	0.985531
Q09666	AHNK_HUMAN	AHNAK	Neuroblast differentiation-associated protein AHNAK	1.45615e+07	1.88796e+07	2.26249e+07	2.15402e+07	3.07335e-05	0.000399052	0.0039456	3.59744e-05	0.000114239	0.0399973	0.163155	0.834378	0.771282	0.643603	0.676014	0.834458	0.876481	1.05036
Q9UMS4	PRP19_HUMAN	PRPF19	Pre-mRNA-processing factor 19	3.49245e+06	3.88531e+06	4.50225e+06	3.84552e+06	6.95876e-05	0.000737026	0.0378519	3.61619e-05	0.0605994	0.00419245	0.992566	0.00264445	0.898886	0.775713	0.908187	0.862971	1.01035	1.17078
P31431	SDC4_HUMAN	SDC4	Syndecan-4	563954	490595	409571	268223	4.11062e-09	4.45362e-07	0.0305662	3.72081e-05	3.80051e-09	0.00536501	3.73577e-08	1.94385e-06	1.14953	1.37694	2.10256	1.19783	1.82906	1.52698
Q8NBS9	TXND5_HUMAN	TXNDC5	Thioredoxin domain-containing protein 5	2.55989e+06	3.9739e+06	3.74125e+06	4.18449e+06	1.82542e-06	4.83464e-05	8.07214e-06	3.724e-05	2.56554e-06	0.630499	0.752684	0.174906	0.644177	0.684235	0.611757	1.06219	0.949673	0.894075
P26599	PTBP1_HUMAN	PTBP1	Polypyrimidine tract-binding protein 1	4.33455e+06	5.13093e+06	6.65566e+06	5.98163e+06	4.27713e-05	0.000506587	0.0604795	3.8089e-05	0.000603886	0.00282959	0.0769572	0.27482	0.844789	0.651258	0.724645	0.770912	0.857782	1.11268
Q6IBS0	TWF2_HUMAN	TWF2	Twinfilin-2	802847	986428	1.06983e+06	1.16548e+06	3.46444e-06	7.92265e-05	0.000805476	3.88747e-05	2.53341e-06	0.215439	0.00465452	0.163358	0.813893	0.750441	0.688855	0.922038	0.84637	0.917934
Q15818	NPTX1_HUMAN	NPTX1	Neuronal pentraxin-1	69691.5	88348.1	121681	144148	2.33641e-06	5.76169e-05	0.0339279	4.05683e-05	2.73394e-06	0.0054131	0.000157459	0.173105	0.788829	0.572741	0.483471	0.726066	0.612898	0.844136
Q13813	SPTN1_HUMAN	SPTAN1	Spectrin alpha chain, non-erythrocytic 1	7.08056e+06	9.49118e+06	9.61245e+06	9.99013e+06	7.78683e-06	0.000147038	6.07935e-05	4.08544e-05	1.26906e-05	0.990724	0.635879	0.799747	0.746015	0.736603	0.708755	0.987384	0.950056	0.962195
O95273	CCDB1_HUMAN	CCNDBP1	Cyclin-D1-binding protein 1	52432.1	59171.6	83758.5	74095.3	3.28305e-05	0.000418067	0.260821	4.17109e-05	0.000730382	0.000712255	0.0195056	0.254926	0.886102	0.625991	0.70763	0.706455	0.798588	1.13042
Q08380	LG3BP_HUMAN	LGALS3BP	Galectin-3-binding protein	881402	1.0153e+06	1.08423e+06	1.01813e+06	6.40993e-05	0.00069562	0.00137793	4.2415e-05	0.00114365	0.142282	0.99943	0.170496	0.868118	0.81293	0.86571	0.936428	0.997226	1.06493
P14923	PLAK_HUMAN	JUP	Junction plakoglobin	771790	913036	997276	925798	6.55292e-05	0.000709971	0.00205311	4.25159e-05	0.00099339	0.0961252	0.96956	0.195588	0.8453	0.773898	0.833648	0.91553	0.986216	1.07721
Q8N3U4	STAG2_HUMAN	STAG2	Cohesin subunit SA-2	317312	392794	404503	454806	1.21981e-06	3.5204e-05	0.000140621	4.25779e-05	6.70179e-07	0.825626	0.00378312	0.0167398	0.807835	0.78445	0.697688	0.971052	0.863652	0.889398
Q9Y5T4	DJC15_HUMAN	DNAJC15	DnaJ homolog subfamily C member 15	109113	166491	185604	201070	9.49362e-06	0.000170124	0.00038807	4.27756e-05	1.06437e-05	0.447225	0.0897131	0.702942	0.655372	0.587884	0.542664	0.897023	0.828023	0.92308
Q96S52	PIGS_HUMAN	PIGS	GPI transamidase component PIG-S	282582	340389	362250	347318	4.23638e-05	0.000504473	0.000660172	4.3637e-05	0.000258266	0.292826	0.926748	0.607103	0.830171	0.780073	0.81361	0.939653	0.980051	1.04299
Q9H6E4	CC134_HUMAN	CCDC134	Coiled-coil domain-containing protein 134	315085	468203	463312	527099	2.52675e-06	6.13296e-05	3.44635e-05	4.36997e-05	2.19348e-06	0.99787	0.153158	0.114919	0.672967	0.680071	0.597772	1.01056	0.888264	0.878984
P11047	LAMC1_HUMAN	LAMC1	Laminin subunit gamma-1	1.61223e+06	2.0823e+06	1.99442e+06	1.81871e+06	6.34569e-06	0.000125942	6.57755e-06	4.45947e-05	0.00588106	0.455902	0.00253826	0.0352836	0.774253	0.80837	0.886467	1.04406	1.14493	1.09661
Q9BPX6	MICU1_HUMAN	MICU1	Calcium uptake protein 1, mitochondrial	92061.3	112907	136293	136915	1.94178e-05	0.000287741	0.0112009	4.49197e-05	4.1472e-05	0.0185976	0.0167535	0.99992	0.815371	0.675467	0.672395	0.828417	0.82465	0.995452
P21580	TNAP3_HUMAN	TNFAIP3	Tumor necrosis factor alpha-induced protein 3	309988	245122	227097	222979	1.64846e-05	0.000255145	0.000592029	4.50197e-05	2.56318e-05	0.332336	0.178824	0.972744	1.26462	1.365	1.39021	1.07937	1.09931	1.01847
Q99470	SDF2_HUMAN	SDF2	Stromal cell-derived factor 2	139092	222360	231142	228023	1.85624e-05	0.00027912	0.000102288	4.65447e-05	6.30059e-05	0.939182	0.984906	0.995895	0.625527	0.601762	0.609993	0.962009	0.975167	1.01368
P08243	ASNS_HUMAN	ASNS	Asparagine synthetase [glutamine-hydrolyzing]	1.23106e+06	1.05501e+06	1.05959e+06	903305	4.39497e-08	2.64058e-06	3.49472e-05	4.76394e-05	1.85272e-08	0.995362	3.38156e-05	2.49783e-05	1.16687	1.16183	1.36284	0.995677	1.16794	1.17301
Q16513	PKN2_HUMAN	PKN2	Serine/threonine-protein kinase N2	1.07454e+06	1.16098e+06	1.33313e+06	1.53775e+06	2.16593e-07	9.47988e-06	0.0968583	4.77407e-05	2.23891e-07	0.00235228	3.03468e-06	0.00202475	0.925544	0.806025	0.698773	0.870866	0.754986	0.866937
P17152	TMM11_HUMAN	TMEM11	Transmembrane protein 11, mitochondrial	879540	754209	719539	624435	3.28143e-07	1.31436e-05	0.000568573	4.77936e-05	1.57254e-07	0.364602	8.25539e-05	0.00107014	1.16618	1.22237	1.40854	1.04818	1.20783	1.1523
O60499	STX10_HUMAN	STX10	Syntaxin-10	727814	921474	1.07544e+06	1.16251e+06	7.70601e-06	0.000145928	0.00369437	4.78238e-05	7.74832e-06	0.0617511	0.00508827	0.503175	0.789837	0.676758	0.626071	0.856833	0.792658	0.925103
Q00341	VIGLN_HUMAN	HDLBP	Vigilin	1.80493e+06	1.98453e+06	2.29471e+06	2.17864e+06	4.79163e-05	0.000556554	0.0617602	4.84685e-05	0.000482363	0.00375659	0.0589749	0.421985	0.909501	0.786563	0.828468	0.864829	0.910905	1.05328
Q9H173	SIL1_HUMAN	SIL1	Nucleotide exchange factor SIL1	199314	279052	268782	272254	7.63988e-06	0.000145092	1.50053e-05	4.94364e-05	3.50933e-05	0.796226	0.909579	0.993784	0.714256	0.741547	0.73209	1.03821	1.02497	0.987246
Q969V6	MRTFA_HUMAN	MRTFA	Myocardin-related transcription factor A	365387	412720	489349	626234	9.04809e-08	4.82248e-06	0.0463734	5.11921e-05	7.59131e-08	0.00534959	1.29653e-06	0.000270327	0.885315	0.74668	0.583467	0.843406	0.659051	0.781416
Q13435	SF3B2_HUMAN	SF3B2	Splicing factor 3B subunit 2	3.27495e+06	3.94278e+06	4.08274e+06	4.29429e+06	7.08795e-06	0.000136972	0.000274838	5.17028e-05	6.3506e-06	0.656244	0.0635232	0.384372	0.83062	0.802147	0.76263	0.965721	0.918145	0.950736
Q92499	DDX1_HUMAN	DDX1	ATP-dependent RNA helicase DDX1	1.63139e+06	1.81243e+06	2.02815e+06	1.91921e+06	7.05085e-05	0.000744394	0.0194984	5.2079e-05	0.000758399	0.0129383	0.269909	0.310911	0.900111	0.804372	0.85003	0.893636	0.944361	1.05676
Q6Y7W6	GGYF2_HUMAN	GIGYF2	GRB10-interacting GYF protein 2	441382	471279	499511	537075	5.98301e-07	2.01744e-05	0.011025	5.26892e-05	4.16995e-07	0.0232411	3.07374e-05	0.00547377	0.936562	0.883628	0.821826	0.943481	0.877492	0.930058
Q7Z3B1	NEGR1_HUMAN	NEGR1	Neuronal growth regulator 1	187911	263631	247061	276877	1.28534e-06	3.6934e-05	6.08148e-06	5.38023e-05	1.53133e-06	0.352839	0.616165	0.050382	0.712781	0.760586	0.678681	1.06707	0.952159	0.892313
Q4LE39	ARI4B_HUMAN	ARID4B	AT-rich interactive domain-containing protein 4B	75224.7	98955.6	115159	103575	7.51094e-05	0.000783167	0.00251878	5.48119e-05	0.000721219	0.107146	0.867691	0.341404	0.760186	0.653227	0.72628	0.859298	0.955397	1.11183
Q15843	NEDD8_HUMAN	NEDD8	NEDD8	700994	901701	1.05567e+06	930996	9.06425e-05	0.000906288	0.00422557	5.48647e-05	0.00149658	0.0641597	0.923687	0.177393	0.777413	0.66403	0.752951	0.854154	0.968534	1.13391
Q16890	TPD53_HUMAN	TPD52L1	Tumor protein D53	132190	172733	191442	199635	1.54705e-05	0.000244604	0.00102268	5.66161e-05	1.86078e-05	0.260663	0.0676739	0.831653	0.76529	0.6905	0.662161	0.902273	0.865242	0.958958
O15042	SR140_HUMAN	U2SURP	U2 snRNP-associated SURP motif-containing protein	1.38033e+06	1.50615e+06	1.71156e+06	1.61379e+06	7.08236e-05	0.000746528	0.058885	5.68592e-05	0.00103779	0.0048145	0.138485	0.258438	0.916464	0.806476	0.855337	0.879987	0.933301	1.06058
Q13619	CUL4A_HUMAN	CUL4A	Cullin-4A	712414	813441	821787	894963	8.3557e-07	2.65494e-05	0.000114931	5.78478e-05	4.13809e-07	0.959482	0.00209266	0.00480007	0.875802	0.866908	0.796026	0.989844	0.908911	0.918236
P01106	MYC_HUMAN	MYC	Myc proto-oncogene protein	35621.2	80088.4	92524	83413.8	4.31282e-05	0.00050899	0.000374339	5.91525e-05	0.000216238	0.595016	0.982653	0.800106	0.444774	0.384995	0.427042	0.865596	0.960134	1.10922
P47755	CAZA2_HUMAN	CAPZA2	F-actin-capping protein subunit alpha-2	975116	1.41125e+06	1.82315e+06	1.76689e+06	3.7932e-05	0.000459144	0.00654887	5.98955e-05	9.69708e-05	0.0461995	0.0835099	0.985011	0.69096	0.534853	0.551884	0.774072	0.79872	1.03184
Q9P2M7	CING_HUMAN	CGN	Cingulin	40414.5	76702.3	73953.3	83312.5	6.02773e-06	0.000121827	3.02089e-05	6.02214e-05	9.22133e-06	0.953883	0.782414	0.489615	0.526901	0.546487	0.485095	1.03717	0.920658	0.887661
P13674	P4HA1_HUMAN	P4HA1	Prolyl 4-hydroxylase subunit alpha-1	845701	1.0346e+06	1.03567e+06	948548	3.06492e-05	0.000398741	6.51779e-05	6.08543e-05	0.00801326	0.999953	0.041998	0.0385051	0.817417	0.816578	0.891575	0.998974	1.09072	1.09184
P09211	GSTP1_HUMAN	GSTP1	Glutathione S-transferase P	8.51228e+06	1.33942e+07	1.80742e+07	1.85764e+07	2.58818e-05	0.000356048	0.00491371	6.10639e-05	4.46888e-05	0.0630848	0.0424401	0.995477	0.635518	0.470962	0.45823	0.741068	0.721033	0.972965
P15407	FOSL1_HUMAN	FOSL1	Fos-related antigen 1	441540	253997	155849	42082.6	1.02755e-08	8.97543e-07	0.0109823	6.12772e-05	7.47122e-09	0.0283201	1.50979e-07	4.17119e-06	1.73837	2.83313	10.4922	1.62976	6.03567	3.7034
P52907	CAZA1_HUMAN	CAPZA1	F-actin-capping protein subunit alpha-1	3.53856e+06	4.94294e+06	5.67307e+06	5.64207e+06	3.59026e-05	0.000440758	0.00161626	6.68416e-05	7.32523e-05	0.205849	0.227283	0.99989	0.715883	0.623748	0.627175	0.871299	0.876086	1.00549
Q92747	ARC1A_HUMAN	ARPC1A	Actin-related protein 2/3 complex subunit 1A	852769	977619	1.03992e+06	1.07851e+06	1.24907e-05	0.000208461	0.00181864	6.76285e-05	1.20769e-05	0.186994	0.0200955	0.567355	0.872292	0.820037	0.790695	0.940095	0.906457	0.964219
P78344	IF4G2_HUMAN	EIF4G2	Eukaryotic translation initiation factor 4 gamma 2	3.81117e+06	3.33294e+06	3.18736e+06	2.92651e+06	2.0758e-06	5.29689e-05	0.000911999	6.77013e-05	1.16064e-06	0.344447	0.00120673	0.0237313	1.14349	1.19571	1.30229	1.04567	1.13888	1.08913
O60869	EDF1_HUMAN	EDF1	Endothelial differentiation-related factor 1	3.30357e+06	3.85233e+06	4.08876e+06	4.05348e+06	4.28833e-05	0.000507005	0.00134628	6.86498e-05	0.000106134	0.249898	0.38232	0.989036	0.857551	0.807964	0.814996	0.942175	0.950375	1.0087
O43924	PDE6D_HUMAN	PDE6D	Retinal rod rhodopsin-sensitive cGMP 3',5'-cyclic phosphodiesterase subunit delta	42843.8	109220	108377	102983	2.61473e-05	0.000356416	7.82496e-05	6.93441e-05	0.000147583	0.999749	0.969046	0.949169	0.39227	0.39532	0.416028	1.00778	1.06057	1.05238
Q00796	DHSO_HUMAN	SORD	Sorbitol dehydrogenase	1.20386e+06	1.39912e+06	1.53718e+06	1.73531e+06	1.82881e-06	4.83464e-05	0.00468571	7.17768e-05	1.16228e-06	0.0806898	0.000259355	0.022089	0.860443	0.783162	0.693744	0.910185	0.806264	0.885825
Q13283	G3BP1_HUMAN	G3BP1	Ras GTPase-activating protein-binding protein 1	2.4233e+06	2.99712e+06	3.72832e+06	3.19752e+06	0.000129983	0.00118819	0.0213875	7.22103e-05	0.00326509	0.0179067	0.704679	0.115642	0.808542	0.649971	0.757869	0.803881	0.937328	1.166
Q7Z7K0	COXM1_HUMAN	CMC1	COX assembly mitochondrial protein homolog	80871.9	122585	134905	147353	1.38378e-05	0.000223605	0.000452822	7.25749e-05	1.43624e-05	0.609387	0.113673	0.61917	0.659721	0.599472	0.54883	0.908674	0.831912	0.915523
Q13510	ASAH1_HUMAN	ASAH1	Acid ceramidase	207996	318390	316750	416650	7.87339e-07	2.53184e-05	7.38723e-05	7.29358e-05	3.8837e-07	1	0.00317104	0.0032207	0.653274	0.656655	0.49921	1.00518	0.764166	0.760231
Q99996	AKAP9_HUMAN	AKAP9	A-kinase anchor protein 9	151095	198772	209179	236426	4.53043e-06	9.81693e-05	0.000351263	7.37233e-05	2.93609e-06	0.711732	0.0147807	0.0945664	0.760142	0.722325	0.639081	0.950251	0.840739	0.884755
P13196	HEM1_HUMAN	ALAS1	5-aminolevulinate synthase, non-specific, mitochondrial	82374.2	102129	126818	103784	0.000159752	0.00138194	0.0228783	7.65725e-05	0.0138369	0.0180264	0.991337	0.0298008	0.806569	0.649549	0.79371	0.805323	0.984057	1.22194
P20290	BTF3_HUMAN	BTF3	Transcription factor BTF3	1.10949e+06	1.57865e+06	2.15559e+06	1.76799e+06	0.000128611	0.00118018	0.0133735	7.92071e-05	0.00185692	0.0321688	0.664794	0.218029	0.70281	0.514705	0.627544	0.732353	0.892906	1.21923
Q96NU1	SAM11_HUMAN	SAMD11	Sterile alpha motif domain-containing protein 11	49340.7	59130.7	71415.2	117641	1.04876e-08	9.00163e-07	0.0222799	7.95059e-05	8.27732e-09	0.0194078	1.20807e-07	4.00728e-06	0.834434	0.690899	0.419418	0.827985	0.502638	0.607062
Q8NBP0	TTC13_HUMAN	TTC13	Tetratricopeptide repeat protein 13	59181.7	81246	86202.9	73504.2	8.34545e-05	0.000846163	0.000401888	7.971e-05	0.00793631	0.693541	0.313742	0.0545062	0.728426	0.68654	0.805147	0.942498	1.10532	1.17276
P54289	CA2D1_HUMAN	CACNA2D1	Voltage-dependent calcium channel subunit alpha-2/delta-1	209504	267877	285744	301109	1.63179e-05	0.000253753	0.000772368	8.01411e-05	1.67168e-05	0.456907	0.0789049	0.648346	0.782092	0.733188	0.695775	0.93747	0.889633	0.948972
Q9Y6H1	CHCH2_HUMAN	CHCHD2	Coiled-coil-helix-coiled-coil-helix domain-containing protein 2	1.6772e+06	2.01477e+06	2.22193e+06	2.49368e+06	3.62847e-06	8.18449e-05	0.00329652	8.03036e-05	2.37607e-06	0.129731	0.00101479	0.0616371	0.832455	0.75484	0.672581	0.906764	0.80795	0.891025
Q6Q0C0	TRAF7_HUMAN	TRAF7	E3 ubiquitin-protein ligase TRAF7	68612.4	91644.6	100712	116828	4.74516e-06	0.000101491	0.00109408	8.10793e-05	3.00956e-06	0.35215	0.00438231	0.0875585	0.748679	0.681274	0.587292	0.909968	0.784438	0.86205
Q14249	NUCG_HUMAN	ENDOG	Endonuclease G, mitochondrial	45932.2	70882.6	89308.6	96552.9	2.32347e-05	0.000326719	0.00304214	8.19499e-05	2.84435e-05	0.143329	0.0382769	0.860354	0.648003	0.514308	0.47572	0.793682	0.734132	0.924971
Q96GW9	SYMM_HUMAN	MARS2	Methionine--tRNA ligase, mitochondrial	321404	284286	267843	241701	1.42563e-06	4.00935e-05	0.00272421	8.22406e-05	8.02779e-07	0.159667	0.000243649	0.00988713	1.13057	1.19997	1.32976	1.06139	1.17619	1.10816
Q07157	ZO1_HUMAN	TJP1	Tight junction protein ZO-1	654247	742853	760322	685480	5.05302e-05	0.000580789	0.000417998	8.39651e-05	0.197188	0.700209	0.0145177	0.00222314	0.880722	0.860486	0.954436	0.977024	1.0837	1.10918
O60216	RAD21_HUMAN	RAD21	Double-strand-break repair protein rad21 homolog	681228	767993	790619	837606	4.86962e-06	0.000103761	0.000639715	8.41406e-05	3.05038e-06	0.542547	0.00798803	0.0854673	0.887023	0.861639	0.813303	0.971382	0.91689	0.943903
Q99574	NEUS_HUMAN	SERPINI1	Neuroserpin	55660.6	76497.2	87199.7	83343.7	7.03349e-05	0.000743749	0.00176348	8.42726e-05	0.000255436	0.243787	0.622795	0.868169	0.727616	0.638312	0.667844	0.877264	0.917853	1.04627
Q8IZT6	ASPM_HUMAN	ASPM	Abnormal spindle-like microcephaly-associated protein	146425	234078	244586	245247	3.15526e-05	0.000406494	0.000195471	8.46421e-05	8.53393e-05	0.935419	0.937159	1	0.625539	0.598662	0.59705	0.957035	0.954458	0.997307
Q9Y6N7	ROBO1_HUMAN	ROBO1	Roundabout homolog 1	92498.9	110759	142026	181591	9.32276e-07	2.87916e-05	0.0477615	8.47969e-05	8.13059e-07	0.0097921	2.49032e-05	0.00972845	0.835135	0.65128	0.509379	0.77985	0.609937	0.78212
Q2TAY7	SMU1_HUMAN	SMU1	WD40 repeat-containing protein SMU1	1.17414e+06	1.29873e+06	1.48554e+06	1.38152e+06	0.000127277	0.00117483	0.0496727	8.575e-05	0.00221758	0.00954412	0.320376	0.202199	0.904073	0.790383	0.849894	0.874247	0.940072	1.07529
Q9ULT8	HECD1_HUMAN	HECTD1	E3 ubiquitin-protein ligase HECTD1	522707	559724	595201	668581	1.5798e-07	7.56588e-06	0.0160373	8.834e-05	1.04795e-07	0.030755	3.77225e-06	0.000261673	0.933866	0.878203	0.781815	0.940395	0.837182	0.890244
Q16706	MA2A1_HUMAN	MAN2A1	Alpha-mannosidase 2	70431	115994	121999	129417	2.15967e-05	0.000311643	0.000226488	8.84113e-05	3.31824e-05	0.913158	0.538827	0.887074	0.607193	0.577309	0.544218	0.950782	0.896284	0.942681
Q14011	CIRBP_HUMAN	CIRBP	Cold-inducible RNA-binding protein	343704	493218	480422	539877	4.7379e-06	0.000101491	4.33054e-05	8.86239e-05	4.4973e-06	0.95219	0.308618	0.141322	0.696861	0.715422	0.636635	1.02664	0.913575	0.889873
P80723	BASP1_HUMAN	BASP1	Brain acid soluble protein 1	7.32668e+06	5.25549e+06	3.33249e+06	2.00123e+06	5.65834e-07	1.93808e-05	0.0576253	8.8964e-05	4.91598e-07	0.00859772	1.14683e-05	0.00382718	1.3941	2.19856	3.66109	1.57705	2.62613	1.66522
Q9NPL8	TIDC1_HUMAN	TIMMDC1	Complex I assembly factor TIMMDC1, mitochondrial	55871.2	103509	121431	130102	2.95252e-05	0.000390264	0.000765733	9.13489e-05	4.1999e-05	0.511257	0.245974	0.940215	0.539773	0.460106	0.42944	0.852406	0.795594	0.933351
Q8IV08	PLD3_HUMAN	PLD3	5'-3' exonuclease PLD3	340611	451085	489304	600837	1.66434e-06	4.50805e-05	0.000973734	9.17399e-05	8.57115e-07	0.431245	0.000704004	0.00966162	0.755092	0.696114	0.566894	0.921893	0.750761	0.81437
P38571	LICH_HUMAN	LIPA	Lysosomal acid lipase/cholesteryl ester hydrolase	76320.4	119287	137888	188947	2.27418e-06	5.69079e-05	0.00119272	9.28912e-05	1.22721e-06	0.372742	0.00100557	0.0175151	0.639805	0.553494	0.403925	0.865099	0.631326	0.729773
P42330	AK1C3_HUMAN	AKR1C3	Aldo-keto reductase family 1 member C3	2.52511e+06	4.30637e+06	6.18173e+06	7.58705e+06	1.18217e-05	0.000200333	0.0105202	9.38574e-05	1.15736e-05	0.0504	0.00318451	0.418815	0.586367	0.408479	0.332819	0.696628	0.567594	0.814774
Q9BTE3	MCMBP_HUMAN	MCMBP	Mini-chromosome maintenance complex-binding protein	366479	410574	464146	491352	9.30146e-06	0.000168416	0.0276774	9.4608e-05	1.03053e-05	0.0194143	0.00109134	0.368935	0.892602	0.789577	0.745859	0.884579	0.835601	0.944631
Q00169	PIPNA_HUMAN	PITPNA	Phosphatidylinositol transfer protein alpha isoform	251318	346598	386479	417577	1.90166e-05	0.000282429	0.00129171	9.73098e-05	1.85572e-05	0.365066	0.0526666	0.615947	0.7251	0.650277	0.601848	0.896809	0.830021	0.925527
O60716	CTND1_HUMAN	CTNND1	Catenin delta-1	1.25742e+06	1.4372e+06	1.52358e+06	1.48634e+06	9.27473e-05	0.000924536	0.0024695	0.000102558	0.00036558	0.222137	0.64297	0.823201	0.87491	0.825307	0.845986	0.943305	0.966941	1.02506
O95833	CLIC3_HUMAN	CLIC3	Chloride intracellular channel protein 3	136661	155083	214389	220802	1.6708e-05	0.000255737	0.263044	0.00010257	5.2171e-05	0.00203662	0.000919169	0.960433	0.881211	0.637445	0.618929	0.723373	0.702362	0.970954
Q9NR28	DBLOH_HUMAN	DIABLO	Diablo IAP-binding mitochondrial protein	182833	236430	266153	275545	3.56776e-05	0.000440758	0.00283001	0.00010271	4.87795e-05	0.196884	0.0827243	0.94801	0.773304	0.686946	0.66353	0.888326	0.858046	0.965913
O43633	CHM2A_HUMAN	CHMP2A	Charged multivesicular body protein 2a	1.27914e+06	1.49519e+06	1.62961e+06	1.57642e+06	0.000101404	0.000995806	0.00469399	0.000104054	0.000417015	0.124892	0.475072	0.784863	0.8555	0.784935	0.81142	0.917516	0.948474	1.03374
Q13586	STIM1_HUMAN	STIM1	Stromal interaction molecule 1	192324	253020	261800	240994	8.78345e-05	0.000886256	0.000336627	0.000104693	0.00167514	0.855412	0.74545	0.316622	0.760114	0.734622	0.798046	0.966464	1.0499	1.08633
P53634	CATC_HUMAN	CTSC	Dipeptidyl peptidase 1	1.01804e+06	1.17142e+06	1.3313e+06	1.30037e+06	7.7749e-05	0.000805397	0.0178435	0.000104983	0.000252824	0.0342361	0.096147	0.929123	0.86907	0.764699	0.782887	0.879905	0.900834	1.02378
P35611	ADDA_HUMAN	ADD1	Alpha-adducin	1.02835e+06	1.18278e+06	1.2632e+06	1.40333e+06	2.6956e-06	6.40836e-05	0.00294044	0.000105586	1.55835e-06	0.195906	0.000606434	0.0222556	0.869433	0.814087	0.732793	0.936342	0.84284	0.900142
O60508	PRP17_HUMAN	CDC40	Pre-mRNA-processing factor 17	487410	584631	645231	651061	4.65378e-05	0.000544369	0.00430788	0.000106835	7.59937e-05	0.13954	0.0938724	0.994722	0.833705	0.755404	0.74864	0.906081	0.897967	0.991045
Q9Y657	SPIN1_HUMAN	SPIN1	Spindlin-1	276390	348050	383577	415564	1.46374e-05	0.000234233	0.00257245	0.000107344	1.22644e-05	0.224713	0.0142594	0.394732	0.794113	0.720561	0.665098	0.907379	0.837536	0.923027
P50579	MAP2_HUMAN	METAP2	Methionine aminopeptidase 2	610124	755836	822910	753538	0.000146282	0.00130661	0.00188425	0.000107398	0.0021418	0.294231	0.999825	0.263848	0.807218	0.741422	0.809679	0.918491	1.00305	1.09206
Q86UU1	PHLB1_HUMAN	PHLDB1	Pleckstrin homology-like domain family B member 1	130564	143678	161866	183014	1.21153e-06	3.5204e-05	0.045919	0.000109321	1.01299e-06	0.013953	3.40042e-05	0.0103544	0.908729	0.806619	0.713413	0.887635	0.785067	0.884448
Q15582	BGH3_HUMAN	TGFBI	Transforming growth factor-beta-induced protein ig-h3	856814	610973	675104	606600	1.30044e-06	3.72061e-05	3.06109e-06	0.000110685	2.43463e-06	0.0618158	0.996682	0.0432576	1.40238	1.26916	1.41249	0.905005	1.00721	1.11293
Q13501	SQSTM_HUMAN	SQSTM1	Sequestosome-1	2.74156e+06	2.96521e+06	3.69304e+06	2.63863e+06	3.00409e-05	0.000392372	0.368855	0.000111433	0.833611	0.00149041	0.104358	3.50783e-05	0.924576	0.742358	1.03901	0.802917	1.12377	1.39961
P62854	RS26_HUMAN	RPS26	40S ribosomal protein S26	3.13553e+06	3.7389e+06	4.83503e+06	4.29595e+06	0.000151826	0.00133434	0.0805413	0.000119865	0.00201801	0.00880271	0.196087	0.309095	0.838625	0.648503	0.729882	0.773293	0.870331	1.12549
Q7L1Q6	5MP2_HUMAN	BZW1	eIF5-mimic protein 2	3.90341e+06	3.61363e+06	3.39343e+06	3.04914e+06	5.2994e-07	1.85311e-05	0.0153413	0.000121818	3.40345e-07	0.0476728	1.83256e-05	0.00139646	1.08019	1.15028	1.28017	1.06489	1.18513	1.11292
Q32P28	P3H1_HUMAN	P3H1	Prolyl 3-hydroxylase 1	1.0214e+06	1.2592e+06	1.27463e+06	1.30844e+06	2.63731e-05	0.000358642	0.000206027	0.000124401	4.11557e-05	0.985004	0.670113	0.85364	0.811154	0.801335	0.78063	0.987894	0.96237	0.974163
P54727	RD23B_HUMAN	RAD23B	UV excision repair protein RAD23 homolog B	2.52349e+06	3.18158e+06	3.61181e+06	3.96182e+06	1.4952e-05	0.000238146	0.00472658	0.000127969	1.22605e-05	0.156491	0.007623	0.336389	0.793156	0.698677	0.636952	0.880882	0.80306	0.911655
Q15643	TRIPB_HUMAN	TRIP11	Thyroid receptor-interacting protein 11	132990	167735	174714	179075	3.77808e-05	0.000459144	0.00055762	0.000128316	5.59157e-05	0.763274	0.428282	0.932148	0.792859	0.761186	0.74265	0.960052	0.936674	0.975648
P22061	PIMT_HUMAN	PCMT1	Protein-L-isoaspartate(D-aspartate) O-methyltransferase	1.59404e+06	1.90821e+06	2.34011e+06	1.92177e+06	0.0002729	0.0020647	0.0409649	0.000132285	0.0312455	0.0197772	0.998586	0.0259692	0.835357	0.68118	0.829462	0.815436	0.992943	1.21768
P35052	GPC1_HUMAN	GPC1	Glypican-1	709818	747082	871606	2.03913e+06	8.09817e-13	4.46007e-10	0.389996	0.000134532	1.52145e-12	0.00172217	2.10654e-12	1.11371e-11	0.950122	0.81438	0.348098	0.857132	0.366372	0.42744
O75683	SURF6_HUMAN	SURF6	Surfeit locus protein 6	1.3187e+06	1.18221e+06	1.04283e+06	913103	1.73075e-06	4.63099e-05	0.0415688	0.000134741	1.39346e-06	0.0199286	5.54135e-05	0.0137119	1.11545	1.26454	1.44419	1.13366	1.29472	1.14207
Q7Z4H8	PLGT3_HUMAN	POGLUT3	Protein O-glucosyltransferase 3	217933	318576	345601	327157	9.4838e-05	0.000941118	0.000750565	0.000135018	0.000413603	0.677162	0.980225	0.874223	0.684085	0.630591	0.666142	0.921802	0.97377	1.05638
O00303	EIF3F_HUMAN	EIF3F	Eukaryotic translation initiation factor 3 subunit F	1.13018e+06	1.27473e+06	1.42747e+06	1.41113e+06	8.09232e-05	0.000830168	0.0224962	0.000135085	0.000210784	0.0369733	0.0625827	0.989683	0.886606	0.791739	0.800905	0.893	0.903339	1.01158
Q9HB19	PKHA2_HUMAN	PLEKHA2	Pleckstrin homology domain-containing family A member 2	358500	321961	301766	293116	2.76802e-05	0.00037032	0.00732027	0.000136365	2.92299e-05	0.111607	0.0161721	0.683801	1.11349	1.188	1.22307	1.06692	1.09841	1.02951
P47756	CAPZB_HUMAN	CAPZB	F-actin-capping protein subunit beta	6.13162e+06	7.29355e+06	8.95199e+06	8.4243e+06	0.00012858	0.00118018	0.0519732	0.000142655	0.000688992	0.0170334	0.102602	0.729645	0.840691	0.684945	0.727849	0.814741	0.865775	1.06264
O60563	CCNT1_HUMAN	CCNT1	Cyclin-T1	181654	215189	212971	212895	3.38046e-05	0.000428819	7.8823e-05	0.000144071	0.000143891	0.973145	0.973299	1	0.844159	0.852951	0.853257	1.01041	1.01078	1.00036
P10155	RO60_HUMAN	RO60	RNA-binding protein RO60	365160	397763	419492	453477	2.52888e-06	6.13296e-05	0.00827486	0.000144523	1.54756e-06	0.106155	0.000238257	0.0149872	0.918035	0.870481	0.805244	0.948201	0.877139	0.925056
Q9NP77	SSU72_HUMAN	SSU72	RNA polymerase II subunit A C-terminal domain phosphatase SSU72	370062	469541	506095	564715	1.10502e-05	0.000192186	0.00160582	0.000145111	7.39611e-06	0.438363	0.0112727	0.160538	0.788135	0.73121	0.655307	0.927773	0.831465	0.896195
Q9BYW2	SETD2_HUMAN	SETD2	Histone-lysine N-methyltransferase SETD2	141801	171033	184620	213145	3.13919e-06	7.30524e-05	0.00292897	0.000145739	1.73068e-06	0.273779	0.000710853	0.0178348	0.829085	0.76807	0.665279	0.926407	0.802425	0.866169
P09543	CN37_HUMAN	CNP	2',3'-cyclic-nucleotide 3'-phosphodiesterase	1.64241e+06	1.42005e+06	1.42872e+06	1.38112e+06	1.43503e-05	0.000230756	0.000100058	0.000145825	1.71662e-05	0.993276	0.568606	0.423285	1.15658	1.14956	1.18919	0.993932	1.02819	1.03447
Q9H6S3	ES8L2_HUMAN	EPS8L2	Epidermal growth factor receptor kinase substrate 8-like protein 2	333673	357669	382578	388720	3.6609e-05	0.000448053	0.0284759	0.000150082	5.33416e-05	0.0331985	0.00915033	0.880532	0.932911	0.872169	0.85839	0.93489	0.92012	0.984201
Q9Y2Z4	SYYM_HUMAN	YARS2	Tyrosine--tRNA ligase, mitochondrial	1.37961e+06	1.18765e+06	1.1657e+06	1.00647e+06	4.93103e-07	1.77544e-05	0.000423322	0.000150416	2.17829e-07	0.898141	0.000181159	0.000515669	1.16163	1.18351	1.37074	1.01884	1.18002	1.15821
Q14257	RCN2_HUMAN	RCN2	Reticulocalbin-2	286880	459960	482597	657466	2.69028e-06	6.40836e-05	0.000463776	0.000156293	1.33655e-06	0.885302	0.00307498	0.0106946	0.623706	0.59445	0.436341	0.953094	0.699595	0.734025
Q8N3D4	EH1L1_HUMAN	EHBP1L1	EH domain-binding protein 1-like protein 1	324198	391899	419737	490120	2.53552e-06	6.13296e-05	0.00229405	0.000156732	1.32406e-06	0.357664	0.000600273	0.0104934	0.827248	0.772383	0.661466	0.933677	0.799597	0.856396
Q14139	UBE4A_HUMAN	UBE4A	Ubiquitin conjugation factor E4 A	141867	171621	175799	168803	0.000114631	0.00109238	0.000483418	0.000157369	0.000989811	0.876236	0.967637	0.638006	0.826633	0.806984	0.840431	0.976231	1.01669	1.04145
P54819	KAD2_HUMAN	AK2	Adenylate kinase 2, mitochondrial	3.94625e+06	4.57501e+06	5.78935e+06	4.25397e+06	0.000196343	0.00161397	0.109848	0.000158585	0.568959	0.0089202	0.647556	0.00120913	0.862568	0.68164	0.927663	0.790245	1.07547	1.36093
Q96T88	UHRF1_HUMAN	UHRF1	E3 ubiquitin-protein ligase UHRF1	316138	342114	447087	439190	4.02025e-05	0.000484851	0.498945	0.000159567	0.000244476	0.00148816	0.00240293	0.991117	0.924072	0.707107	0.71982	0.765208	0.778965	1.01798
Q6VY07	PACS1_HUMAN	PACS1	Phosphofurin acidic cluster sorting protein 1	278087	312215	333619	340639	4.51257e-05	0.000529726	0.00674883	0.000160184	5.45502e-05	0.144154	0.0398048	0.8686	0.89069	0.833547	0.816368	0.935844	0.916557	0.979391
Q9HC36	MRM3_HUMAN	MRM3	rRNA methyltransferase 3, mitochondrial	447636	376091	379505	314212	1.17717e-07	6.07805e-06	9.32092e-05	0.000160973	5.03362e-08	0.980229	7.13257e-05	4.24267e-05	1.19023	1.17953	1.42463	0.991003	1.19693	1.2078
Q96IZ0	PAWR_HUMAN	PAWR	PRKC apoptosis WT1 regulator protein	431077	612707	604506	643431	2.20995e-05	0.000315454	0.000114406	0.000161562	3.42235e-05	0.99491	0.815544	0.685595	0.703562	0.713107	0.669966	1.01357	0.952249	0.939504
Q8N131	PORIM_HUMAN	TMEM123	Porimin	195986	217915	267868	298702	6.17219e-06	0.000123752	0.16979	0.000161951	8.41048e-06	0.0057168	0.000161082	0.168815	0.899368	0.73165	0.656125	0.813516	0.72954	0.896774
P62081	RS7_HUMAN	RPS7	40S ribosomal protein S7	7.44939e+06	8.53087e+06	1.03101e+07	7.8623e+06	0.000176459	0.00147997	0.0835694	0.000162485	0.70891	0.0122335	0.419633	0.000842178	0.873228	0.722537	0.947482	0.827432	1.08503	1.31133
Q6NUK1	SCMC1_HUMAN	SLC25A24	Calcium-binding mitochondrial carrier protein SCaMC-1	6.77866e+06	5.99606e+06	5.41806e+06	4.58844e+06	8.42297e-07	2.66191e-05	0.0173686	0.000165947	5.35703e-07	0.0609773	3.06661e-05	0.0021326	1.13052	1.25112	1.47733	1.10668	1.30677	1.18081
Q6IPR3	TYW3_HUMAN	TYW3	tRNA wybutosine-synthesizing protein 3 homolog	32556.6	47934.1	72957.9	63048	0.00017674	0.00148045	0.0540506	0.000166558	0.00117329	0.0197318	0.168985	0.599286	0.679195	0.446238	0.516378	0.657011	0.76028	1.15718
Q9HD67	MYO10_HUMAN	MYO10	Unconventional myosin-X	185253	195972	232351	233105	3.46882e-05	0.000433622	0.402219	0.000167307	0.000147484	0.00212104	0.0018369	0.999752	0.945299	0.797295	0.794716	0.843432	0.840704	0.996766
Q8N726	ARF_HUMAN	CDKN2A	Tumor suppressor ARF	1.45813e+06	2.10116e+06	2.47754e+06	4.22237e+06	1.89975e-07	8.59961e-06	0.00339356	0.000168577	9.83466e-08	0.278842	9.92173e-06	0.000121403	0.693964	0.58854	0.345335	0.848085	0.497627	0.586765
P52655	TF2AA_HUMAN	GTF2A1	Transcription initiation factor IIA subunit 1	34771.6	39859.6	84465.7	34015.2	5.9899e-05	0.000659787	0.855981	0.000168663	0.992995	0.00055984	0.718691	0.000114738	0.872351	0.411665	1.02224	0.471903	1.17182	2.48318
P12036	NFH_HUMAN	NEFH	Neurofilament heavy polypeptide	96732.3	110983	136001	130018	0.000119414	0.00112456	0.0914736	0.000169154	0.000572822	0.0116822	0.0478102	0.850256	0.871598	0.711264	0.743993	0.816046	0.853597	1.04602
P25789	PSA4_HUMAN	PSMA4	Proteasome subunit alpha type-4	3.30286e+06	3.99302e+06	4.34242e+06	4.20674e+06	0.000149722	0.00132133	0.00370131	0.000170788	0.000535195	0.262565	0.647065	0.87231	0.827159	0.760605	0.785137	0.919539	0.949197	1.03225
Q7LBC6	KDM3B_HUMAN	KDM3B	Lysine-specific demethylase 3B	538968	567793	639447	692881	2.59269e-06	6.23093e-05	0.265794	0.000172638	3.49975e-06	0.00369397	3.71871e-05	0.0446778	0.949232	0.842865	0.777865	0.887944	0.819467	0.922882
P02792	FRIL_HUMAN	FTL	Ferritin light chain	408569	726708	1.07888e+06	987622	0.000139045	0.00125711	0.0117494	0.00017367	0.000418509	0.0937501	0.236582	0.9344	0.562219	0.378696	0.413689	0.673575	0.735815	1.0924
P11717	MPRI_HUMAN	IGF2R	Cation-independent mannose-6-phosphate receptor	846846	1.02734e+06	1.0909e+06	1.24249e+06	4.96279e-06	0.000105125	0.00192791	0.000177199	2.70135e-06	0.452378	0.00207475	0.0289022	0.824308	0.776282	0.681573	0.941737	0.826842	0.877997
P04080	CYTB_HUMAN	CSTB	Cystatin-B	445737	671295	747557	737326	9.9208e-05	0.000977147	0.00162074	0.000177425	0.000227517	0.510502	0.607399	0.998201	0.663995	0.596258	0.604532	0.897985	0.910446	1.01388
Q86TC9	MYPN_HUMAN	MYPN	Myopalladin	382630	327957	312181	324205	0.000179776	0.00149829	0.00199422	0.000179215	0.00109489	0.445637	0.982435	0.65341	1.16671	1.22567	1.18021	1.05054	1.01157	0.962911
Q99538	LGMN_HUMAN	LGMN	Legumain	82306.5	206398	272537	703147	1.0057e-06	3.00755e-05	0.00199178	0.000181246	4.86358e-07	0.450114	0.000152548	0.00163856	0.398775	0.302001	0.117054	0.75732	0.293535	0.387597
P16989	YBOX3_HUMAN	YBX3	Y-box-binding protein 3	2.39011e+06	2.78854e+06	2.96395e+06	2.99179e+06	7.76743e-05	0.000805397	0.00335756	0.000183188	0.000120276	0.304492	0.199775	0.991038	0.857118	0.806394	0.798888	0.94082	0.932064	0.990693
Q8IV38	ANKY2_HUMAN	ANKMY2	Ankyrin repeat and MYND domain-containing protein 2	155640	184014	206002	219878	2.66553e-05	0.00035952	0.0116027	0.000187057	2.49705e-05	0.103194	0.00824443	0.489079	0.845803	0.755526	0.707846	0.893264	0.836892	0.936892
Q9BQ48	RM34_HUMAN	MRPL34	39S ribosomal protein L34, mitochondrial	315716	386513	405365	367324	0.000216674	0.00175061	0.00113495	0.000187409	0.0107626	0.6582	0.56209	0.111011	0.816831	0.778843	0.859503	0.953494	1.05224	1.10356
P35226	BMI1_HUMAN	BMI1	Polycomb complex protein BMI-1	31585.5	141605	149058	94216	0.00011798	0.00111709	0.000258207	0.000190368	0.00904225	0.996765	0.183727	0.132896	0.223053	0.211901	0.335245	0.950002	1.50298	1.58209
P08581	MET_HUMAN	MET	Hepatocyte growth factor receptor	475667	592773	667311	645651	0.000158618	0.00137573	0.00674705	0.000190877	0.000487432	0.17412	0.416874	0.923602	0.802444	0.712811	0.736724	0.8883	0.9181	1.03355
Q8NFT8	DNER_HUMAN	DNER	Delta and Notch-like epidermal growth factor-related receptor	31434.1	44416.5	63732.6	67388.6	5.7837e-05	0.000642428	0.0448859	0.000191205	0.00010164	0.0280986	0.0130509	0.970748	0.707713	0.493219	0.466461	0.69692	0.65911	0.945747
Q9BZZ5	API5_HUMAN	API5	Apoptosis inhibitor 5	1.78211e+06	1.95581e+06	1.99211e+06	2.08747e+06	9.93814e-06	0.000175618	0.000960378	0.0001931	5.97788e-06	0.729093	0.0142925	0.0869882	0.911187	0.894581	0.853716	0.981775	0.936928	0.95432
Q9H1U4	MEGF9_HUMAN	MEGF9	Multiple epidermal growth factor-like domains protein 9	112414	161824	171231	248008	6.64758e-07	2.17494e-05	0.00070713	0.000193531	2.97791e-07	0.830548	0.000183249	0.000666852	0.694669	0.656506	0.453269	0.945063	0.652496	0.690426
Q8N129	CNPY4_HUMAN	CNPY4	Protein canopy homolog 4	149750	209045	208680	228909	1.87321e-05	0.00027946	0.000190333	0.00019354	1.87703e-05	0.999999	0.367768	0.36239	0.716352	0.717607	0.654189	1.00175	0.913223	0.911626
Q6UXN9	WDR82_HUMAN	WDR82	WD repeat-containing protein 82	1.00728e+06	1.07173e+06	1.12287e+06	1.17548e+06	7.9303e-06	0.000148896	0.0167177	0.000194039	5.7974e-06	0.07588	0.000798201	0.0827824	0.939863	0.897057	0.856913	0.954455	0.911742	0.955249
O00471	EXOC5_HUMAN	EXOC5	Exocyst complex component 5	282184	325853	336566	343576	5.48464e-05	0.000622817	0.0012631	0.000196571	6.85232e-05	0.638696	0.263898	0.879799	0.865987	0.838423	0.821315	0.968171	0.948415	0.979595
Q15648	MED1_HUMAN	MED1	Mediator of RNA polymerase II transcription subunit 1	215842	249319	251270	246171	0.000105289	0.00102482	0.000322776	0.000199947	0.000739696	0.988081	0.948903	0.827511	0.865726	0.859002	0.876796	0.992233	1.01279	1.02071
Q13616	CUL1_HUMAN	CUL1	Cullin-1	288037	336374	348036	400117	1.49346e-06	4.12982e-05	0.001104	0.000199998	6.98082e-07	0.693569	0.000453204	0.00269651	0.856301	0.827606	0.719883	0.96649	0.84069	0.869838
Q96SB3	NEB2_HUMAN	PPP1R9B	Neurabin-2	102760	124084	142649	157390	1.83566e-05	0.000276984	0.0164249	0.000202092	1.57056e-05	0.0808595	0.00313995	0.287666	0.828144	0.72037	0.6529	0.869861	0.78839	0.90634
Q9NYA1	SPHK1_HUMAN	SPHK1	Sphingosine kinase 1	442959	345415	333032	230745	6.91134e-08	3.90402e-06	0.000730829	0.000202955	3.26112e-08	0.835992	6.21868e-06	1.72103e-05	1.2824	1.33008	1.91969	1.03718	1.49696	1.44329
Q7Z7F7	RM55_HUMAN	MRPL55	39S ribosomal protein L55, mitochondrial	241767	392795	473617	396318	0.000266103	0.0020308	0.0033235	0.000204231	0.00282623	0.3393	0.999664	0.384502	0.615505	0.51047	0.610034	0.829351	0.991111	1.19504
P25787	PSA2_HUMAN	PSMA2	Proteasome subunit alpha type-2	3.05785e+06	3.50244e+06	4.02054e+06	4.07556e+06	7.16795e-05	0.000754347	0.0439827	0.000210612	0.000131325	0.0321607	0.0182443	0.987691	0.873063	0.760558	0.75029	0.871137	0.859376	0.9865
Q66PJ3	AR6P4_HUMAN	ARL6IP4	ADP-ribosylation factor-like protein 6-interacting protein 4	1.03688e+06	1.11608e+06	1.20613e+06	1.20262e+06	0.000106912	0.00103909	0.0475075	0.000215418	0.000260311	0.0305565	0.0381373	0.999225	0.929032	0.859675	0.862184	0.925344	0.928045	1.00292
Q92945	FUBP2_HUMAN	KHSRP	Far upstream element-binding protein 2	2.66216e+06	3.19953e+06	3.40837e+06	3.79811e+06	1.02904e-05	0.000180876	0.0027604	0.000215862	6.17078e-06	0.410135	0.00491612	0.0802035	0.832048	0.781066	0.700916	0.938727	0.842399	0.897385
Q13868	EXOS2_HUMAN	EXOSC2	Exosome complex component RRP4	343296	488496	595052	504984	0.000326823	0.0023592	0.00713641	0.000217624	0.00381183	0.189938	0.982531	0.322461	0.702761	0.576918	0.679815	0.820931	0.967349	1.17836
Q9NPF0	CD320_HUMAN	CD320	CD320 antigen	99529.8	130975	146702	158461	4.27235e-05	0.000506587	0.00418051	0.000217945	4.05023e-05	0.299794	0.0440203	0.641067	0.759912	0.678449	0.628105	0.8928	0.826549	0.925794
P28331	NDUS1_HUMAN	NDUFS1	NADH-ubiquinone oxidoreductase 75 kDa subunit, mitochondrial	869681	948335	1.04782e+06	1.12438e+06	9.4985e-06	0.000170124	0.0563516	0.00021855	8.95296e-06	0.0261369	0.000475057	0.132662	0.917061	0.829989	0.773476	0.905053	0.843428	0.931911
P49642	PRI1_HUMAN	PRIM1	DNA primase small subunit	193559	224748	238248	255282	1.86903e-05	0.00027946	0.00344298	0.000219188	1.29851e-05	0.351592	0.0114267	0.212728	0.861228	0.812427	0.758219	0.943335	0.880393	0.933276
P49759	CLK1_HUMAN	CLK1	Dual specificity protein kinase CLK1	163527	109161	96940.3	58723.4	3.89115e-07	1.48651e-05	0.00219416	0.00022149	1.87638e-07	0.492351	3.45874e-05	0.000268516	1.49804	1.68688	2.7847	1.12606	1.8589	1.6508
Q15717	ELAV1_HUMAN	ELAVL1	ELAV-like protein 1	3.21782e+06	3.57843e+06	3.83145e+06	3.64909e+06	0.000338924	0.00242419	0.0115628	0.000222393	0.00355474	0.125418	0.901252	0.347418	0.899226	0.839844	0.881815	0.933964	0.980639	1.04997
O15381	NVL_HUMAN	NVL	Nuclear valosin-containing protein-like	227299	242946	266184	227147	0.000114709	0.00109238	0.0909845	0.000226361	0.999995	0.0166051	0.0875202	0.000218693	0.935593	0.853917	1.00067	0.912701	1.06956	1.17186
Q9BQL6	FERM1_HUMAN	FERMT1	Fermitin family homolog 1	289031	242082	243939	272319	5.93818e-05	0.000655183	0.000156669	0.000227226	0.174395	0.994019	0.00533706	0.00826128	1.19394	1.18485	1.06137	0.99239	0.888966	0.895783
Q27J81	INF2_HUMAN	INF2	Inverted formin-2	475720	549685	611011	660751	2.02232e-05	0.000294134	0.0172443	0.00023236	1.69081e-05	0.090384	0.0033088	0.273666	0.865441	0.778579	0.719969	0.899632	0.831909	0.924722
Q9H7Z7	PGES2_HUMAN	PTGES2	Prostaglandin E synthase 2	646023	720743	824212	758391	0.000383621	0.00264099	0.0674358	0.000233535	0.00711559	0.0235154	0.584917	0.204701	0.89633	0.783808	0.851834	0.874463	0.950357	1.08679
Q09028	RBBP4_HUMAN	RBBP4	Histone-binding protein RBBP4	1.04377e+06	1.58326e+06	1.93827e+06	1.83808e+06	0.00017531	0.00147595	0.00574801	0.000234401	0.000469171	0.246838	0.452583	0.966979	0.659258	0.538508	0.567862	0.81684	0.861366	1.05451
Q15181	IPYR_HUMAN	PPA1	Inorganic pyrophosphatase	1.99062e+06	2.52272e+06	2.7078e+06	2.73764e+06	9.71302e-05	0.000959542	0.00202735	0.00023639	0.000156555	0.543851	0.393042	0.99194	0.78908	0.735145	0.727131	0.931649	0.921492	0.989098
P46734	MP2K3_HUMAN	MAP2K3	Dual specificity mitogen-activated protein kinase kinase 3	615220	549951	528696	452818	3.1194e-07	1.28851e-05	0.00301848	0.000238283	1.55444e-07	0.416966	2.06129e-05	0.000183222	1.11868	1.16365	1.35865	1.0402	1.21451	1.16757
O95155	UBE4B_HUMAN	UBE4B	Ubiquitin conjugation factor E4 B	293485	351205	359260	488410	2.47363e-08	1.72087e-06	0.000662661	0.000239779	1.26422e-08	0.909032	1.63252e-06	3.36872e-06	0.835651	0.816914	0.600898	0.977578	0.719078	0.735571
P35556	FBN2_HUMAN	FBN2	Fibrillin-2	65101.9	90183.9	105350	89683.2	0.000367568	0.00257412	0.00554993	0.000240332	0.00592366	0.260458	0.999979	0.246582	0.721879	0.61796	0.725909	0.856044	1.00558	1.17469
Q07352	TISB_HUMAN	ZFP36L1	mRNA decay activator protein ZFP36L1	684208	445353	365559	182294	1.67474e-07	7.87849e-06	0.00549663	0.000240415	9.09443e-08	0.262653	6.35681e-06	7.61167e-05	1.53633	1.87168	3.75332	1.21828	2.44305	2.00533
Q8WXI9	P66B_HUMAN	GATAD2B	Transcriptional repressor p66-beta	388521	435320	496240	509370	5.71948e-05	0.000638514	0.0664216	0.000249237	9.2308e-05	0.0257815	0.00779022	0.90098	0.892496	0.78293	0.762748	0.877236	0.854624	0.974223
Q96GE9	DMAC1_HUMAN	DMAC1	Distal membrane-arm assembly complex protein 1	72382.5	110264	135009	136186	0.000128451	0.00118018	0.00586406	0.00025806	0.000220801	0.26636	0.228767	0.999566	0.656449	0.53613	0.531497	0.816712	0.809654	0.991358
Q8NFQ8	TOIP2_HUMAN	TOR1AIP2	Torsin-1A-interacting protein 2	457548	542073	629159	606055	0.000224454	0.00178537	0.0353602	0.000266148	0.000803219	0.0525281	0.171357	0.889503	0.844071	0.727237	0.754961	0.861583	0.894429	1.03812
Q8TBM8	DJB14_HUMAN	DNAJB14	DnaJ homolog subfamily B member 14	110169	151311	172637	171630	0.000153427	0.00134483	0.00453999	0.000266769	0.00030835	0.337532	0.382637	0.999663	0.728096	0.638153	0.6419	0.876469	0.881615	1.00587
O14773	TPP1_HUMAN	TPP1	Tripeptidyl-peptidase 1	389840	486882	533940	518765	0.000215707	0.00174758	0.00484927	0.000272674	0.000641036	0.326875	0.621897	0.94319	0.800686	0.730118	0.751476	0.911866	0.93854	1.02925
Q9Y639	NPTN_HUMAN	NPTN	Neuroplastin	437273	561605	678685	623009	0.00032743	0.00235985	0.0275076	0.000277754	0.00181432	0.0705274	0.424703	0.645328	0.778614	0.644295	0.701873	0.82749	0.901439	1.08937
Q02818	NUCB1_HUMAN	NUCB1	Nucleobindin-1	779602	1.29179e+06	1.21341e+06	1.19844e+06	5.43543e-05	0.000618292	7.84557e-05	0.000281641	0.000381477	0.81403	0.70646	0.997013	0.603504	0.64249	0.650512	1.0646	1.07789	1.01249
P24928	RPB1_HUMAN	POLR2A	DNA-directed RNA polymerase II subunit RPB1	632924	745768	872912	955665	2.65267e-05	0.000358914	0.0397222	0.00028177	2.60749e-05	0.0499784	0.00262274	0.364326	0.848687	0.725072	0.662287	0.854345	0.780366	0.913408
Q13308	PTK7_HUMAN	PTK7	Inactive tyrosine-protein kinase 7	238888	259540	317164	327984	3.82623e-05	0.000462296	0.332954	0.000287035	9.59345e-05	0.00502191	0.00142395	0.874371	0.920427	0.753201	0.728354	0.818317	0.791321	0.967011
Q16363	LAMA4_HUMAN	LAMA4	Laminin subunit alpha-4	77596.4	114682	108482	96960.1	6.87679e-05	0.000730687	7.06544e-05	0.000297349	0.0072853	0.755797	0.0511033	0.254613	0.67662	0.715294	0.800292	1.05716	1.18278	1.11883
Q9UNF1	MAGD2_HUMAN	MAGED2	Melanoma-associated antigen D2	712327	793724	827383	981216	2.12155e-07	9.41029e-06	0.00433978	0.00029741	1.10671e-07	0.383853	9.81046e-06	8.557e-05	0.89745	0.86094	0.725964	0.959318	0.808918	0.843222
Q8TF66	LRC15_HUMAN	LRRC15	Leucine-rich repeat-containing protein 15	35012.2	44036.7	82120.7	117140	5.57216e-06	0.000114014	0.395496	0.00030002	8.53604e-06	0.00420964	7.05123e-05	0.0877397	0.795069	0.42635	0.298891	0.536243	0.375931	0.701046
Q9H900	ZWILC_HUMAN	ZWILCH	Protein zwilch homolog	119101	169121	162309	183251	1.28959e-05	0.000212013	9.96629e-05	0.000301634	1.18324e-05	0.871876	0.406349	0.135701	0.704233	0.733787	0.64993	1.04197	0.922891	0.88572
P08572	CO4A2_HUMAN	COL4A2	Collagen alpha-2(IV) chain	509051	597304	614050	642185	4.35807e-05	0.0005125	0.00117914	0.000302401	3.80493e-05	0.820822	0.145571	0.488513	0.852248	0.829006	0.792686	0.972729	0.930112	0.956189
Q8IY47	KBTB2_HUMAN	KBTBD2	Kelch repeat and BTB domain-containing protein 2	43567	64391.8	73395.1	79904.5	7.34999e-05	0.000771548	0.00314262	0.000302761	7.70736e-05	0.489331	0.129484	0.782947	0.676592	0.593595	0.545238	0.877332	0.805861	0.918535
Q9Y618	NCOR2_HUMAN	NCOR2	Nuclear receptor corepressor 2	387876	451801	495677	641016	3.16664e-07	1.29532e-05	0.0128218	0.00030457	1.85104e-07	0.159593	9.24279e-06	0.000191454	0.85851	0.782517	0.605095	0.911483	0.704821	0.773268
Q53GA4	PHLA2_HUMAN	PHLDA2	Pleckstrin homology-like domain family A member 2	800832	576990	573005	362183	7.91846e-08	4.32505e-06	0.000355035	0.00030695	3.60025e-08	0.999666	1.2625e-05	1.42163e-05	1.38795	1.3976	2.21113	1.00695	1.59309	1.58209
O95721	SNP29_HUMAN	SNAP29	Synaptosomal-associated protein 29	226516	282058	328085	380972	1.63751e-05	0.000254045	0.0167584	0.000312539	1.17195e-05	0.128486	0.00207354	0.129027	0.803081	0.690417	0.594573	0.859711	0.740365	0.861179
P10646	TFPI1_HUMAN	TFPI	Tissue factor pathway inhibitor	202074	169754	148253	114169	9.68422e-07	2.97688e-05	0.026675	0.000319093	6.15247e-07	0.0848498	2.67663e-05	0.0013033	1.19039	1.36304	1.76995	1.14503	1.48686	1.29853
Q6UW56	ARAID_HUMAN	ATRAID	All-trans retinoic acid-induced differentiation factor	101528	169655	196406	239350	3.51896e-05	0.000438808	0.0023938	0.000322404	2.58513e-05	0.605644	0.0431673	0.320803	0.598437	0.516929	0.424181	0.863798	0.708814	0.820578
Q96EI5	TCAL4_HUMAN	TCEAL4	Transcription elongation factor A protein-like 4	187837	257413	305850	437240	2.53209e-06	6.13296e-05	0.0108603	0.000333054	1.40938e-06	0.202477	0.000166077	0.00483763	0.729711	0.614148	0.429597	0.841632	0.588723	0.699502
P40121	CAPG_HUMAN	CAPG	Macrophage-capping protein	1.11851e+06	1.37871e+06	1.52277e+06	1.49977e+06	0.000229889	0.00181071	0.00808203	0.000339719	0.000525305	0.26509	0.388715	0.991666	0.811277	0.734525	0.745788	0.905394	0.919277	1.01533
P28066	PSA5_HUMAN	PSMA5	Proteasome subunit alpha type-5	1.17639e+06	1.52004e+06	1.6267e+06	1.645e+06	0.00014581	0.00130577	0.00236393	0.00033982	0.000246638	0.630245	0.507708	0.996414	0.773923	0.723175	0.715133	0.934428	0.924036	0.988879
Q9ULF5	S39AA_HUMAN	SLC39A10	Zinc transporter ZIP10	157345	170856	196538	183632	0.000434583	0.0029159	0.172024	0.000339843	0.00629949	0.0133796	0.265632	0.324028	0.920919	0.800581	0.856847	0.869328	0.930426	1.07028
Q6UWE0	LRSM1_HUMAN	LRSAM1	E3 ubiquitin-protein ligase LRSAM1	194065	244748	285183	331870	1.87083e-05	0.00027946	0.0169819	0.0003412	1.33753e-05	0.139311	0.00244837	0.139698	0.792918	0.680495	0.584764	0.858216	0.737484	0.859322
O43278	SPIT1_HUMAN	SPINT1	Kunitz-type protease inhibitor 1	32881.9	54262.6	68046.7	64025.1	0.000263476	0.00201617	0.00658966	0.00035587	0.00068514	0.325861	0.543014	0.973617	0.605976	0.483225	0.513577	0.797433	0.847521	1.06281
P38398	BRCA1_HUMAN	BRCA1	Breast cancer type 1 susceptibility protein	66500.7	78329.7	101822	100236	0.000144665	0.00129749	0.15845	0.000358308	0.000425564	0.0155872	0.0189757	0.999465	0.848984	0.653109	0.663442	0.769283	0.781454	1.01582
P51970	NDUA8_HUMAN	NDUFA8	NADH dehydrogenase [ubiquinone] 1 alpha subcomplex subunit 8	413156	556060	658879	674180	0.000154497	0.00134709	0.0124212	0.000362818	0.000232281	0.196216	0.123056	0.990529	0.743006	0.627058	0.612826	0.843948	0.824794	0.977304
P50238	CRIP1_HUMAN	CRIP1	Cysteine-rich protein 1	1.05519e+07	1.49254e+07	1.87121e+07	2.3845e+07	1.71553e-05	0.000261243	0.0212497	0.000367789	1.22552e-05	0.122704	0.00175971	0.115019	0.706972	0.563906	0.442519	0.797635	0.625935	0.784738
Q9H4G0	E41L1_HUMAN	EPB41L1	Band 4.1-like protein 1	427938	480715	508233	498928	0.000318574	0.00231623	0.00901601	0.000371737	0.000977051	0.263627	0.567153	0.924943	0.890211	0.842012	0.857715	0.945856	0.963495	1.01865
Q16270	IBP7_HUMAN	IGFBP7	Insulin-like growth factor-binding protein 7	739750	974440	977463	836583	0.00017306	0.00146447	0.000437803	0.000375729	0.0948397	0.999626	0.0340872	0.0286455	0.759154	0.756806	0.884252	0.996907	1.16479	1.1684
Q8NHQ8	RASF8_HUMAN	RASSF8	Ras association domain-containing protein 8	33357	170844	267029	158823	0.000523198	0.00334088	0.00979771	0.000379718	0.00435789	0.251068	0.964415	0.465504	0.195248	0.124919	0.210026	0.639796	1.07569	1.6813
P00390	GSHR_HUMAN	GSR	Glutathione reductase, mitochondrial	1.94787e+06	2.15759e+06	2.36467e+06	2.33861e+06	0.000248948	0.0019311	0.0376157	0.000381991	0.000624602	0.0743072	0.125763	0.98842	0.902802	0.823739	0.832921	0.912425	0.922595	1.01115
Q9BYN0	SRXN1_HUMAN	SRXN1	Sulfiredoxin-1	129232	160642	189883	152692	0.000712686	0.00419799	0.0271835	0.00038297	0.104419	0.101756	0.859872	0.0264499	0.804472	0.680587	0.846358	0.846005	1.05207	1.24357
Q8NFW8	NEUA_HUMAN	CMAS	N-acylneuraminate cytidylyltransferase	341016	320914	296315	279479	1.35485e-05	0.000220005	0.108493	0.000383582	1.34605e-05	0.0254423	0.000436478	0.12447	1.06264	1.15085	1.22018	1.08301	1.14825	1.06024
Q9BRT9	SLD5_HUMAN	GINS4	DNA replication complex GINS protein SLD5	493172	623805	660084	733530	2.90767e-05	0.00038588	0.00217847	0.000389976	1.8912e-05	0.710632	0.0311505	0.187892	0.790588	0.747136	0.672328	0.945038	0.850415	0.899874
Q99081	HTF4_HUMAN	TCF12	Transcription factor 12	484845	608045	659652	669044	0.000176146	0.00147922	0.00463099	0.000391548	0.000279454	0.457137	0.346306	0.995921	0.797383	0.735001	0.724683	0.921766	0.908827	0.985962
Q8N9T8	KRI1_HUMAN	KRI1	Protein KRI1 homolog	186837	218780	230383	238125	9.35421e-05	0.000931054	0.00387914	0.00039198	9.58728e-05	0.514699	0.136234	0.775593	0.853995	0.810986	0.784619	0.949639	0.918763	0.967487
P32321	DCTD_HUMAN	DCTD	Deoxycytidylate deaminase	118991	171084	175134	168065	0.00018842	0.00155464	0.000600908	0.00039258	0.000916541	0.992392	0.99304	0.947285	0.695511	0.679428	0.708005	0.976875	1.01796	1.04206
P63010	AP2B1_HUMAN	AP2B1	AP-2 complex subunit beta	1.87215e+06	2.07054e+06	2.17666e+06	2.17271e+06	0.000222655	0.00178367	0.00927098	0.000396808	0.000412978	0.273814	0.284057	0.999993	0.904187	0.860102	0.861667	0.951244	0.952974	1.00182
Q9NWS0	PIHD1_HUMAN	PIH1D1	PIH1 domain-containing protein 1	111566	127569	165714	140327	0.000610195	0.00372371	0.249687	0.000398681	0.0227427	0.010425	0.497544	0.125512	0.874556	0.673244	0.795039	0.769812	0.909077	1.18091
Q9UNN8	EPCR_HUMAN	PROCR	Endothelial protein C receptor	192045	295138	412702	427674	0.000162181	0.00139383	0.0268427	0.000402152	0.000255708	0.108535	0.0657571	0.99026	0.650696	0.465337	0.449046	0.715137	0.690101	0.964992
P27701	CD82_HUMAN	CD82	CD82 antigen	66521.4	92740.4	120273	147089	3.31928e-05	0.000421868	0.034687	0.000407564	2.8664e-05	0.086298	0.00338078	0.289672	0.717286	0.553088	0.452253	0.771085	0.630506	0.817687
O76080	ZFAN5_HUMAN	ZFAND5	AN1-type zinc finger protein 5	36670.9	66259.1	69770.2	90861.4	2.5913e-05	0.000356048	0.00108669	0.000413342	1.67243e-05	0.925978	0.0549045	0.152154	0.553447	0.525595	0.403591	0.949677	0.729233	0.767875
P20248	CCNA2_HUMAN	CCNA2	Cyclin-A2	156820	270173	282164	255412	0.000257789	0.0019857	0.000811248	0.000418334	0.00185912	0.973447	0.954987	0.787848	0.580442	0.555775	0.613987	0.957504	1.05779	1.10474
Q96J42	TXD15_HUMAN	TXNDC15	Thioredoxin domain-containing protein 15	178951	202510	241570	223858	0.000501063	0.00322133	0.136417	0.000425429	0.00454203	0.0223716	0.249387	0.492794	0.883667	0.740785	0.799396	0.838307	0.904635	1.07912
Q14814	MEF2D_HUMAN	MEF2D	Myocyte-specific enhancer factor 2D	169327	201945	208511	254597	9.79021e-07	2.98173e-05	0.00167355	0.000425515	4.45893e-07	0.825534	0.000156078	0.000570391	0.838481	0.812079	0.665079	0.968512	0.793195	0.818983
Q9Y6E0	STK24_HUMAN	STK24	Serine/threonine-protein kinase 24	356938	431859	482461	494735	0.000160379	0.00138555	0.0140977	0.000432314	0.000216956	0.209067	0.101346	0.967164	0.826514	0.739828	0.721473	0.895118	0.872911	0.975191
O00458	IFRD1_HUMAN	IFRD1	Interferon-related developmental regulator 1	565800	504317	443607	258367	1.56666e-09	2.20298e-07	0.0722859	0.000432544	1.86181e-09	0.0445335	1.05658e-08	1.16618e-07	1.12191	1.27545	2.18991	1.13686	1.95194	1.71696
Q8IVH2	FOXP4_HUMAN	FOXP4	Forkhead box protein P4	82180.8	102774	130238	149100	3.57704e-05	0.000440758	0.0775417	0.000434803	3.74027e-05	0.0416862	0.00216565	0.359708	0.799624	0.631007	0.551178	0.78913	0.689296	0.873489
P62140	PP1B_HUMAN	PPP1CB	Serine/threonine-protein phosphatase PP1-beta catalytic subunit	1.6189e+06	1.73443e+06	1.97024e+06	1.84009e+06	0.000598951	0.00367546	0.22737	0.000439277	0.0118624	0.0130114	0.340962	0.245736	0.933388	0.821676	0.879795	0.880315	0.942582	1.07073
O43852	CALU_HUMAN	CALU	Calumenin	4.33976e+06	6.64881e+06	7.728e+06	9.09505e+06	5.56754e-05	0.000629346	0.00764071	0.000442214	4.32821e-05	0.351159	0.0260444	0.407733	0.652713	0.561564	0.477157	0.860353	0.731036	0.849694
Q9NR56	MBNL1_HUMAN	MBNL1	Muscleblind-like protein 1	33644.8	560101	951958	877122	0.000272634	0.0020647	0.00922779	0.000442551	0.000551691	0.303513	0.367019	0.998919	0.0600691	0.0353427	0.0383581	0.588368	0.638567	1.08532
Q92542	NICA_HUMAN	NCSTN	Nicastrin	795896	934643	935498	869008	0.000230462	0.00181108	0.000460705	0.000443774	0.0384709	0.999995	0.0892482	0.0856981	0.851551	0.850772	0.915866	0.999085	1.07553	1.07651
Q14444	CAPR1_HUMAN	CAPRIN1	Caprin-1	3.7598e+06	4.121e+06	4.21707e+06	4.27894e+06	0.000128759	0.00118018	0.00301592	0.000445099	0.000153065	0.648331	0.280232	0.890186	0.912352	0.891568	0.878675	0.977219	0.963088	0.98554
P49917	DNLI4_HUMAN	LIG4	DNA ligase 4	216972	169150	162656	142179	2.02439e-05	0.000294134	0.00150704	0.000446908	1.17305e-05	0.869325	0.0235486	0.0878878	1.28272	1.33393	1.52604	1.03992	1.18969	1.14402
P54760	EPHB4_HUMAN	EPHB4	Ephrin type-B receptor 4	101519	129412	141129	149179	0.000109375	0.00105373	0.00567262	0.000449498	0.000111489	0.441949	0.112923	0.78481	0.784464	0.719338	0.680521	0.91698	0.867498	0.946038
O75600	KBL_HUMAN	GCAT	2-amino-3-ketobutyrate coenzyme A ligase, mitochondrial	88205.9	132797	125276	117276	0.000103769	0.00101152	0.000109029	0.00045381	0.00243412	0.77326	0.239766	0.728677	0.664217	0.704091	0.75212	1.06003	1.13234	1.06821
P11908	PRPS2_HUMAN	PRPS2	Ribose-phosphate pyrophosphokinase 2	432595	477166	566989	539512	0.000374825	0.00261108	0.2163	0.000459956	0.00248456	0.0145359	0.0890432	0.726685	0.90659	0.762968	0.801825	0.841579	0.884441	1.05093
P60033	CD81_HUMAN	CD81	CD81 antigen	134142	192489	244652	227154	0.00041962	0.00282987	0.0182652	0.000460485	0.00134738	0.177555	0.452282	0.904405	0.696878	0.548295	0.590531	0.786788	0.847395	1.07703
Q9UBQ5	EIF3K_HUMAN	EIF3K	Eukaryotic translation initiation factor 3 subunit K	1.63918e+06	2.22077e+06	2.63043e+06	2.6655e+06	0.000235597	0.00183833	0.0151178	0.000466018	0.000397771	0.211825	0.181128	0.999589	0.738112	0.62316	0.61496	0.844262	0.833153	0.986842
Q6WRI0	IGS10_HUMAN	IGSF10	Immunoglobulin superfamily member 10	55127.2	113751	142204	242446	1.31645e-05	0.000215748	0.00332561	0.000479618	6.97842e-06	0.642752	0.0048656	0.0388565	0.484631	0.387662	0.227379	0.799913	0.469181	0.58654
Q8TCZ2	C99L2_HUMAN	CD99L2	CD99 antigen-like protein 2	41258	71374.6	77822.3	69895.4	0.00035103	0.00247594	0.00154943	0.000484862	0.00202687	0.884248	0.99838	0.81007	0.578048	0.530157	0.590282	0.917149	1.02116	1.11341
Q9UHX1	PUF60_HUMAN	PUF60	Poly(U)-binding-splicing factor PUF60	2.65722e+06	3.15093e+06	3.33747e+06	3.25101e+06	0.000406103	0.00274993	0.0049377	0.000489494	0.00139663	0.516249	0.873532	0.910727	0.843313	0.796177	0.817353	0.944107	0.969217	1.0266
O43399	TPD54_HUMAN	TPD52L2	Tumor protein D54	1.27551e+06	1.57941e+06	1.76091e+06	2.07551e+06	1.53566e-05	0.000243385	0.0113329	0.000492132	9.12916e-06	0.283387	0.00213732	0.0557163	0.807588	0.72435	0.614554	0.896929	0.760974	0.848421
Q9Y315	DEOC_HUMAN	DERA	Deoxyribose-phosphate aldolase	406878	483540	525071	586520	2.52778e-05	0.0003495	0.0107442	0.000493364	1.60718e-05	0.29642	0.00489573	0.120288	0.841457	0.774901	0.693716	0.920904	0.824422	0.895231
P24390	ERD21_HUMAN	KDELR1	ER lumen protein-retaining receptor 1	31712.8	29595.3	115877	77757	0.000135589	0.00122754	0.991387	0.000493556	0.0171774	0.000318106	0.010409	0.200664	1.07155	0.273676	0.407845	0.255402	0.380612	1.49025
Q86XA9	HTR5A_HUMAN	HEATR5A	HEAT repeat-containing protein 5A	51736.6	72890.3	77686.5	80607.4	0.000159227	0.0013792	0.00210525	0.00049536	0.000223626	0.805524	0.509815	0.951749	0.709787	0.665967	0.641834	0.938263	0.904263	0.963763
P17535	JUND_HUMAN	JUND	Transcription factor JunD	32526.4	37766.4	67102.2	70089.7	6.3736e-05	0.000692814	0.776827	0.000495957	0.000307142	0.00231166	0.00137931	0.988871	0.861252	0.484729	0.464068	0.562819	0.538829	0.957377
Q02388	CO7A1_HUMAN	COL7A1	Collagen alpha-1(VII) chain	310031	383854	380410	364910	0.000211538	0.00172387	0.000334397	0.000503487	0.00353903	0.99304	0.486788	0.639593	0.807679	0.814992	0.84961	1.00905	1.05192	1.04248
P83111	LACTB_HUMAN	LACTB	Serine beta-lactamase-like protein LACTB, mitochondrial	145351	191033	194824	192352	0.000224084	0.00178537	0.000898133	0.000505948	0.000736891	0.982751	0.999275	0.994902	0.760869	0.746063	0.75565	0.98054	0.993141	1.01285
P07384	CAN1_HUMAN	CAPN1	Calpain-1 catalytic subunit	3.28551e+06	3.69263e+06	3.71561e+06	4.21429e+06	8.80768e-07	2.74575e-05	0.000757187	0.000506288	3.87304e-07	0.993783	0.000259259	0.00038217	0.889747	0.884245	0.77961	0.993816	0.876216	0.881668
Q6MZQ0	PRR5L_HUMAN	PRR5L	Proline-rich protein 5-like	1.17389e+06	861827	737359	712561	0.000171919	0.00145669	0.012794	0.000518391	0.000210794	0.269328	0.107553	0.932372	1.36209	1.59202	1.64742	1.1688	1.20948	1.0348
P31943	HNRH1_HUMAN	HNRNPH1	Heterogeneous nuclear ribonucleoprotein H	7.32237e+06	9.40068e+06	1.19391e+07	1.06867e+07	0.000638763	0.00385885	0.0731662	0.000519571	0.00420691	0.0539651	0.391711	0.5921	0.77892	0.613313	0.685187	0.787389	0.879663	1.11719
Q96AE4	FUBP1_HUMAN	FUBP1	Far upstream element-binding protein 1	3.03098e+06	3.87503e+06	4.0911e+06	4.47005e+06	6.03769e-05	0.000663945	0.00298376	0.000520134	4.49394e-05	0.709911	0.0707807	0.369997	0.782182	0.740872	0.678063	0.947186	0.866887	0.915223
P58004	SESN2_HUMAN	SESN2	Sestrin-2	78170.8	44585.7	39845.1	43856.8	0.000411162	0.0027785	0.00222641	0.000521618	0.00216732	0.805328	0.999998	0.813437	1.75327	1.96187	1.78241	1.11898	1.01662	0.908526
Q9BZG8	DPH1_HUMAN	DPH1	2-(3-amino-3-carboxypropyl)histidine synthase subunit 1	34029.9	54438	50855.1	58927.2	2.42069e-05	0.000337239	0.000119261	0.000523889	2.68824e-05	0.757288	0.700465	0.213087	0.625113	0.669153	0.577491	1.07045	0.923818	0.863017
Q9UKX7	NUP50_HUMAN	NUP50	Nuclear pore complex protein Nup50	1.01681e+06	1.13776e+06	1.27898e+06	1.06534e+06	0.000628552	0.00381811	0.0650674	0.000528448	0.64743	0.0618904	0.398809	0.00364662	0.893692	0.795016	0.954444	0.889586	1.06798	1.20053
Q68E01	INT3_HUMAN	INTS3	Integrator complex subunit 3	178840	199646	202370	202355	0.000233295	0.00182683	0.00145944	0.000535255	0.000542465	0.92126	0.924091	1	0.895783	0.883726	0.88379	0.986541	0.986612	1.00007
P25440	BRD2_HUMAN	BRD2	Bromodomain-containing protein 2	297232	323533	374450	357486	0.000466628	0.0030686	0.236428	0.00053791	0.0033861	0.0156128	0.10935	0.679391	0.918706	0.793783	0.83145	0.864022	0.905023	1.04745
Q6ZRV2	FA83H_HUMAN	FAM83H	Protein FAM83H	254003	247732	217643	161262	3.93612e-09	4.33563e-07	0.78618	0.000538174	6.54774e-09	0.00244983	1.23924e-08	6.92351e-07	1.02531	1.16706	1.57509	1.13825	1.5362	1.34962
Q9UBG0	MRC2_HUMAN	MRC2	C-type mannose receptor 2	219025	228005	288625	321912	9.19558e-06	0.00016711	0.828569	0.000539135	2.23018e-05	0.00213272	6.94219e-05	0.165921	0.960615	0.758857	0.680389	0.78997	0.708285	0.896597
Q8N0X7	SPART_HUMAN	SPART	Spartin	173900	203302	241590	285013	1.36647e-05	0.000221348	0.0760871	0.00054214	1.11132e-05	0.0543532	0.000476571	0.0660949	0.855377	0.719814	0.610146	0.841517	0.713306	0.847643
P26373	RL13_HUMAN	RPL13	60S ribosomal protein L13	2.82213e+07	2.51416e+07	2.34132e+07	2.26163e+07	0.000114473	0.00109238	0.0202303	0.000561403	0.000114077	0.197451	0.0334558	0.715398	1.1225	1.20536	1.24783	1.07382	1.11166	1.03524
P06744	G6PI_HUMAN	GPI	Glucose-6-phosphate isomerase	1.10889e+07	1.318e+07	1.5298e+07	1.78807e+07	1.6755e-05	0.000255737	0.052213	0.000561738	1.26434e-05	0.0822353	0.000794464	0.0760075	0.841344	0.724858	0.620162	0.861548	0.737109	0.855563
O00629	IMA3_HUMAN	KPNA4	Importin subunit alpha-3	1.21658e+06	1.43573e+06	1.63618e+06	1.42631e+06	0.00109596	0.0058085	0.0401003	0.000562035	0.0456977	0.106077	0.999838	0.0936284	0.847361	0.743548	0.852957	0.877487	1.0066	1.14714
Q9P0K7	RAI14_HUMAN	RAI14	Ankycorbin	5.21173e+06	6.41746e+06	6.66374e+06	5.67785e+06	0.000376647	0.00261477	0.00223706	0.00056637	0.291547	0.829956	0.0564016	0.0128058	0.812118	0.782103	0.917906	0.963041	1.13026	1.17364
P17931	LEG3_HUMAN	LGALS3	Galectin-3	1.2667e+06	1.50457e+06	1.66362e+06	1.86118e+06	3.21383e-05	0.000413233	0.0175051	0.000566731	2.17958e-05	0.225566	0.00458256	0.153398	0.841901	0.761411	0.68059	0.904395	0.808397	0.893854
O75937	DNJC8_HUMAN	DNAJC8	DnaJ homolog subfamily C member 8	1.91083e+06	2.42698e+06	2.63538e+06	2.59885e+06	0.000383162	0.00264099	0.00630192	0.000566954	0.000912157	0.48971	0.662538	0.990094	0.787328	0.725067	0.735259	0.920921	0.933866	1.01406
Q96B01	R51A1_HUMAN	RAD51AP1	RAD51-associated protein 1	82728.7	119264	146151	185481	3.59462e-05	0.000440758	0.014134	0.000575516	2.40943e-05	0.273207	0.00646368	0.170736	0.693658	0.566052	0.446023	0.816038	0.643001	0.787954
Q7Z2W9	RM21_HUMAN	MRPL21	39S ribosomal protein L21, mitochondrial	893135	1.0734e+06	1.16163e+06	1.10683e+06	0.000635938	0.00384882	0.0107157	0.000575641	0.00301252	0.339835	0.879879	0.743118	0.832062	0.768864	0.806928	0.924046	0.969793	1.04951
P14625	ENPL_HUMAN	HSP90B1	Endoplasmin	1.36752e+07	1.79529e+07	1.8884e+07	1.49126e+07	0.000331707	0.00238288	0.00251555	0.000583735	0.456872	0.80481	0.0348451	0.00722297	0.76173	0.724171	0.917026	0.950692	1.20387	1.26631
O95340	PAPS2_HUMAN	PAPSS2	Bifunctional 3'-phosphoadenosine 5'-phosphosulfate synthase 2	533204	505082	484396	469026	4.75929e-05	0.000553771	0.0358817	0.000599051	3.87247e-05	0.125863	0.00482527	0.281727	1.05568	1.10076	1.13683	1.0427	1.07688	1.03277
Q8IUI8	CRLF3_HUMAN	CRLF3	Cytokine receptor-like factor 3	71676.6	89623.1	102104	98866.7	0.000482852	0.00314092	0.0170835	0.000600547	0.00127421	0.24312	0.454363	0.964116	0.799755	0.701995	0.724982	0.877763	0.906505	1.03274
Q63HN8	RN213_HUMAN	RNF213	E3 ubiquitin-protein ligase RNF213	435882	495828	515251	697690	1.88945e-08	1.40307e-06	0.00540318	0.000605519	1.22337e-08	0.564135	4.30444e-07	1.65193e-06	0.879099	0.845961	0.62475	0.962304	0.710671	0.73851
P06733	ENOA_HUMAN	ENO1	Alpha-enolase	5.70938e+07	7.7865e+07	1.21348e+08	8.37424e+07	0.00114186	0.00595152	0.153151	0.000606166	0.0672612	0.0293569	0.957864	0.069536	0.733241	0.470497	0.681779	0.641668	0.929816	1.44906
Q9UIV1	CNOT7_HUMAN	CNOT7	CCR4-NOT transcription complex subunit 7	231002	370092	416864	425301	0.000273193	0.0020647	0.0036465	0.000611696	0.00046593	0.701463	0.600139	0.998	0.624173	0.554141	0.543149	0.8878	0.870189	0.980164
Q8IWA4	MFN1_HUMAN	MFN1	Mitofusin-1	121868	135887	146774	145180	0.000447899	0.00298403	0.0299993	0.000627537	0.00106297	0.155513	0.256697	0.986886	0.89683	0.830306	0.839425	0.925823	0.935991	1.01098
Q9NRA8	4ET_HUMAN	EIF4ENIF1	Eukaryotic translation initiation factor 4E transporter	127043	152849	157917	160733	0.000222562	0.00178367	0.00238326	0.000634099	0.000341161	0.84602	0.628913	0.97725	0.831169	0.804496	0.790402	0.967908	0.950951	0.982481
Q9H089	LSG1_HUMAN	LSG1	Large subunit GTPase 1 homolog	382180	437670	445581	395492	0.000251814	0.00195104	0.00180493	0.000636395	0.608709	0.914916	0.0153591	0.00500103	0.873216	0.857712	0.966342	0.982245	1.10665	1.12665
Q9GZV5	WWTR1_HUMAN	WWTR1	WW domain-containing transcription regulator protein 1	31036	44627.3	46686.7	33915.4	0.000224349	0.00178537	0.00156715	0.000638934	0.647025	0.942622	0.0117844	0.0044886	0.695448	0.664771	0.9151	0.955889	1.31584	1.37656
O15020	SPTN2_HUMAN	SPTBN2	Spectrin beta chain, non-erythrocytic 2	1.1329e+06	1.275e+06	1.33437e+06	1.33111e+06	0.000374172	0.00261108	0.0083236	0.000639985	0.00071867	0.444518	0.484198	0.999849	0.888549	0.849012	0.851092	0.955505	0.957846	1.00245
Q13617	CUL2_HUMAN	CUL2	Cullin-2	622362	721208	752544	803297	5.88815e-05	0.000650749	0.00483185	0.000640363	3.99802e-05	0.622734	0.0373584	0.274456	0.862944	0.827011	0.77476	0.95836	0.897809	0.936818
P35080	PROF2_HUMAN	PFN2	Profilin-2	2.30529e+06	3.19672e+06	3.90252e+06	3.90375e+06	0.000364785	0.00256202	0.0216874	0.000641232	0.000670762	0.211388	0.220624	0.999991	0.721144	0.590719	0.590534	0.819141	0.818884	0.999686
Q9BW61	DDA1_HUMAN	DDA1	DET1- and DDB1-associated protein 1	152121	202269	207784	236199	4.10649e-05	0.000492502	0.00141053	0.000641647	2.67105e-05	0.959655	0.0779924	0.17351	0.752074	0.732114	0.644038	0.97346	0.856349	0.879697
Q14247	SRC8_HUMAN	CTTN	Src substrate cortactin	3.07924e+06	3.67472e+06	3.90273e+06	4.66493e+06	5.17878e-06	0.000108656	0.00660747	0.000646489	2.5779e-06	0.52117	0.000598537	0.00607119	0.837951	0.788997	0.660083	0.941578	0.787734	0.83661
Q14914	PTGR1_HUMAN	PTGR1	Prostaglandin reductase 1	824139	954978	1.0101e+06	1.12063e+06	2.29277e-05	0.00032378	0.00792372	0.000646828	1.30399e-05	0.463293	0.00495585	0.0680823	0.862993	0.815896	0.735427	0.945426	0.852182	0.901373
Q96MX6	DAA10_HUMAN	DNAAF10	Dynein axonemal assembly factor 10	168950	184577	199812	240880	4.78891e-07	1.74804e-05	0.0523221	0.000647482	3.30775e-07	0.0954941	7.45742e-06	0.000234658	0.915334	0.845545	0.701387	0.923755	0.766263	0.829509
P42285	MTREX_HUMAN	MTREX	Exosome RNA helicase MTR4	829041	916000	943558	923063	0.000620107	0.00377374	0.00517731	0.000654671	0.00299494	0.607421	0.987915	0.788994	0.905066	0.878633	0.898141	0.970794	0.992348	1.0222
P22033	MUTA_HUMAN	MMUT	Methylmalonyl-CoA mutase, mitochondrial	460281	529082	532179	517735	0.000394362	0.00269528	0.000971649	0.000655558	0.0037161	0.9944	0.848258	0.720119	0.869963	0.8649	0.889029	0.99418	1.02192	1.0279
Q8WWH5	TRUB1_HUMAN	TRUB1	Pseudouridylate synthase TRUB1	158475	189132	202099	194112	0.000699659	0.00414341	0.00842885	0.000668681	0.0032906	0.45549	0.945318	0.7666	0.837903	0.784145	0.816407	0.935842	0.974345	1.04114
P07858	CATB_HUMAN	CTSB	Cathepsin B	423635	524819	545592	537687	0.000379481	0.00262755	0.00248489	0.000677731	0.00103693	0.853898	0.949667	0.993015	0.807202	0.776469	0.787885	0.961926	0.976068	1.0147
O75792	RNH2A_HUMAN	RNASEH2A	Ribonuclease H2 subunit A	316181	359695	403051	447604	2.98484e-05	0.000392372	0.0632218	0.000702245	2.38861e-05	0.0865625	0.00149909	0.138296	0.879026	0.784471	0.706387	0.892432	0.803602	0.900463
Q6H3X3	ULBP5_HUMAN	RAET1G	UL-16 binding protein 5	44950	79432	102701	93555.5	0.00060503	0.00370588	0.0100708	0.000706236	0.00184732	0.419958	0.754891	0.931946	0.565892	0.437678	0.480463	0.773431	0.849037	1.09775
Q15019	SEPT2_HUMAN	SEPTIN2	Septin-2	1.27148e+06	1.49847e+06	1.6415e+06	1.57927e+06	0.000742863	0.00433709	0.0189204	0.000713757	0.00282121	0.261884	0.69513	0.834024	0.848515	0.774583	0.805107	0.912869	0.948842	1.03941
Q9Y490	TLN1_HUMAN	TLN1	Talin-1	2.21976e+06	2.45874e+06	2.60798e+06	2.91574e+06	7.46328e-06	0.000142557	0.0230518	0.000716502	4.33142e-06	0.222915	0.000403953	0.0121084	0.902802	0.851142	0.761301	0.942778	0.843265	0.894446
Q86YM7	HOME1_HUMAN	HOMER1	Homer protein homolog 1	33628.1	57816.2	61682.5	57778.4	0.000465646	0.00306519	0.00197435	0.000717374	0.0021094	0.92228	0.999976	0.908506	0.581638	0.545181	0.582019	0.937319	1.00065	1.06757
Q92538	GBF1_HUMAN	GBF1	Golgi-specific brefeldin A-resistance guanine nucleotide exchange factor 1	317318	357099	372683	415416	9.02809e-06	0.000165499	0.0082447	0.00072237	4.63652e-06	0.48901	0.00112149	0.0133131	0.888601	0.851442	0.763857	0.958182	0.859618	0.897134
Q96G46	DUS3L_HUMAN	DUS3L	tRNA-dihydrouridine(47) synthase [NAD(P)(+)]-like	237675	217500	207036	206800	0.000388914	0.00266909	0.0198916	0.000728457	0.000661938	0.256044	0.234403	0.999915	1.09276	1.14799	1.1493	1.05055	1.05174	1.00114
Q9BWW4	SSBP3_HUMAN	SSBP3	Single-stranded DNA-binding protein 3	111858	146419	159011	220561	1.9495e-06	5.07254e-05	0.00548281	0.000732837	9.42198e-07	0.629604	0.000167548	0.00108577	0.763962	0.703463	0.507154	0.920808	0.663847	0.72094
Q9UQ80	PA2G4_HUMAN	PA2G4	Proliferation-associated protein 2G4	4.38438e+06	5.27397e+06	6.45184e+06	5.71689e+06	0.00113606	0.00593064	0.105814	0.000734948	0.0134223	0.0539938	0.640861	0.351843	0.831324	0.679555	0.766917	0.817437	0.922526	1.12856
P31350	RIR2_HUMAN	RRM2	Ribonucleoside-diphosphate reductase subunit M2	1.25104e+06	1.38619e+06	1.59579e+06	1.51338e+06	0.000793016	0.00454557	0.147506	0.000747957	0.00491016	0.0386007	0.248168	0.674468	0.902498	0.78396	0.826652	0.868655	0.91596	1.05446
Q9BYX2	TBD2A_HUMAN	TBC1D2	TBC1 domain family member 2A	1.0834e+06	872182	895732	840130	4.83068e-05	0.000560104	0.000251722	0.000761287	5.30628e-05	0.888118	0.701076	0.315786	1.24217	1.20951	1.28956	0.973709	1.03815	1.06618
P50607	TUB_HUMAN	TUB	Tubby protein homolog	37803.4	59251.5	58431.3	74782.2	2.02317e-05	0.000294134	0.000708126	0.000775681	1.14294e-05	0.999928	0.0513567	0.0465026	0.638016	0.646971	0.505514	1.01404	0.792321	0.781354
Q13151	ROA0_HUMAN	HNRNPA0	Heterogeneous nuclear ribonucleoprotein A0	3.60489e+06	4.25585e+06	5.21138e+06	4.61708e+06	0.00123436	0.00630441	0.133611	0.000786849	0.0170606	0.0454228	0.637279	0.310125	0.847043	0.691734	0.780772	0.816645	0.921761	1.12872
Q92922	SMRC1_HUMAN	SMARCC1	SWI/SNF complex subunit SMARCC1	746658	864188	948153	957076	0.000378461	0.0026246	0.0300789	0.000788074	0.000609484	0.194063	0.150644	0.998381	0.863999	0.787486	0.780145	0.911443	0.902946	0.990677
P29374	ARI4A_HUMAN	ARID4A	AT-rich interactive domain-containing protein 4A	31752.6	30019.1	45612.5	50040	8.07549e-06	0.000150765	0.828677	0.000790419	9.27714e-05	0.000213442	2.91935e-05	0.506218	1.05775	0.696137	0.634543	0.658132	0.599901	0.911521
Q01581	HMCS1_HUMAN	HMGCS1	Hydroxymethylglutaryl-CoA synthase, cytoplasmic	767175	909567	936392	956019	0.000233212	0.00182683	0.00278556	0.000794067	0.000303253	0.867966	0.53008	0.923544	0.843451	0.819288	0.802469	0.971353	0.951412	0.97947
P20336	RAB3A_HUMAN	RAB3A	Ras-related protein Rab-3A	292912	414718	458578	462958	0.000399044	0.00271353	0.00649257	0.000796977	0.000686635	0.603193	0.548731	0.999685	0.706293	0.638741	0.632697	0.904356	0.895799	0.990538
Q92575	UBXN4_HUMAN	UBXN4	UBX domain-containing protein 4	482367	576693	614951	565053	0.00112072	0.00587842	0.00842014	0.000803897	0.0189992	0.519881	0.965173	0.290225	0.836437	0.7844	0.853668	0.937787	1.0206	1.08831
Q8N543	OGFD1_HUMAN	OGFOD1	Prolyl 3-hydroxylase OGFOD1	449414	514518	522776	581635	9.58016e-06	0.000171122	0.00199504	0.000804116	4.53478e-06	0.94236	0.0043525	0.0114378	0.873467	0.859669	0.772674	0.984202	0.884605	0.898804
P80303	NUCB2_HUMAN	NUCB2	Nucleobindin-2	167110	307447	248649	184875	9.05601e-06	0.000165499	1.34126e-05	0.000805661	0.559175	0.0558365	7.75936e-05	0.00749059	0.543541	0.672072	0.903909	1.23647	1.663	1.34496
P25490	TYY1_HUMAN	YY1	Transcriptional repressor protein YY1	659061	724843	775622	828386	4.74114e-05	0.000552631	0.0357185	0.000808433	3.46862e-05	0.170899	0.00420546	0.188461	0.909246	0.849719	0.795596	0.934532	0.875007	0.936305
Q8N5L8	RP25L_HUMAN	RPP25L	Ribonuclease P protein subunit p25-like protein	109712	130094	154055	138088	0.00131458	0.0066119	0.0774009	0.000815514	0.014955	0.0830242	0.780953	0.353556	0.843324	0.71216	0.794506	0.844469	0.942112	1.11563
Q14134	TRI29_HUMAN	TRIM29	Tripartite motif-containing protein 29	98065.2	139591	135746	127561	0.000290043	0.00215623	0.000384644	0.000817966	0.00504756	0.961457	0.424525	0.697581	0.702518	0.722418	0.768771	1.02833	1.09431	1.06416
Q9H2H8	PPIL3_HUMAN	PPIL3	Peptidyl-prolyl cis-trans isomerase-like 3	288294	387489	411949	402247	0.000482744	0.00314092	0.00337075	0.000821372	0.00128652	0.825844	0.936309	0.992058	0.744005	0.699829	0.716707	0.940624	0.96331	1.02412
O00299	CLIC1_HUMAN	CLIC1	Chloride intracellular channel protein 1	3.41454e+06	4.2361e+06	4.74632e+06	4.73506e+06	0.000464993	0.00306394	0.0170779	0.000822853	0.000817554	0.321978	0.320213	1	0.806058	0.719408	0.721119	0.892502	0.894624	1.00238
O43570	CAH12_HUMAN	CA12	Carbonic anhydrase 12	135259	178842	220140	206124	0.00079186	0.00454403	0.0394905	0.000828345	0.0026288	0.159923	0.432737	0.893034	0.756302	0.614422	0.656199	0.812403	0.867642	1.068
Q9Y232	CDYL_HUMAN	CDYL	Chromodomain Y-like protein	320747	387659	394099	377784	0.000579103	0.00358697	0.0016736	0.000830245	0.00496551	0.971739	0.914801	0.708358	0.827394	0.813875	0.849022	0.98366	1.02614	1.04318
Q07666	KHDR1_HUMAN	KHDRBS1	KH domain-containing, RNA-binding, signal transduction-associated protein 1	3.77703e+06	4.16305e+06	4.827e+06	4.4959e+06	0.00106065	0.00566109	0.200701	0.000831361	0.0110181	0.0306884	0.35984	0.446689	0.907275	0.78248	0.840105	0.86245	0.925965	1.07364
Q92598	HS105_HUMAN	HSPH1	Heat shock protein 105 kDa	2.34918e+06	2.63584e+06	2.78352e+06	2.87945e+06	0.000170619	0.00144752	0.0153544	0.000833939	0.000157607	0.353078	0.0647306	0.700498	0.891246	0.84396	0.815842	0.946945	0.915396	0.966683
O43598	DNPH1_HUMAN	DNPH1	2'-deoxynucleoside 5'-phosphate N-hydrolase 1	102948	202617	277927	252538	0.00070348	0.00415487	0.01517	0.000836985	0.00194824	0.357353	0.63977	0.952843	0.508092	0.370414	0.407653	0.72903	0.802322	1.10053
Q9NP66	HM20A_HUMAN	HMG20A	High mobility group protein 20A	138429	181239	185829	163648	0.000651612	0.00392214	0.0017	0.000839119	0.0446473	0.971212	0.279459	0.144828	0.763789	0.744925	0.845892	0.975303	1.1075	1.13554
Q92800	EZH1_HUMAN	EZH1	Histone-lysine N-methyltransferase EZH1	37074	67713.9	97041.3	92265	0.000565517	0.00352928	0.0405264	0.000868839	0.00120449	0.163737	0.22326	0.996882	0.547509	0.382043	0.40182	0.697784	0.733906	1.05177
Q8IVD9	NUDC3_HUMAN	NUDCD3	NudC domain-containing protein 3	258109	303563	333645	396701	1.13209e-05	0.000195304	0.0265364	0.000894817	6.61439e-06	0.243262	0.00062837	0.0179568	0.850264	0.773603	0.650638	0.909839	0.765219	0.841048
Q96I15	SCLY_HUMAN	SCLY	Selenocysteine lyase	146198	154500	174169	179998	0.000107486	0.00104008	0.37268	0.000898205	0.000207631	0.0154872	0.00300077	0.778647	0.946267	0.839403	0.812222	0.887068	0.858343	0.967618
Q5VT52	RPRD2_HUMAN	RPRD2	Regulation of nuclear pre-mRNA domain-containing protein 2	1.04528e+06	1.14598e+06	1.35072e+06	1.49495e+06	3.58792e-05	0.000440758	0.273725	0.000899018	4.37278e-05	0.0231058	0.000713866	0.221703	0.912125	0.773864	0.699203	0.848418	0.766564	0.903522
Q01970	PLCB3_HUMAN	PLCB3	1-phosphatidylinositol 4,5-bisphosphate phosphodiesterase beta-3	290199	336209	351857	393520	2.31808e-05	0.000326657	0.00709291	0.000902378	1.22771e-05	0.618749	0.0050855	0.0436461	0.863152	0.824765	0.737445	0.955526	0.854362	0.894127
Q96DI7	SNR40_HUMAN	SNRNP40	U5 small nuclear ribonucleoprotein 40 kDa protein	993714	1.09997e+06	1.1636e+06	1.134e+06	0.000993359	0.00538124	0.0224844	0.000903421	0.00404789	0.281023	0.759318	0.801875	0.903403	0.854	0.876293	0.945314	0.96999	1.0261
P62987	RL40_HUMAN	UBA52	Ubiquitin-60S ribosomal protein L40	55377.1	96385.4	111682	119802	0.000307921	0.00226368	0.00540177	0.000905418	0.000393256	0.7113	0.411679	0.949591	0.574538	0.495847	0.462238	0.863036	0.804538	0.932218
O95832	CLD1_HUMAN	CLDN1	Claudin-1	211712	187750	29539.5	29422.8	0.000183266	0.0015197	0.743154	0.000914602	0.000902048	0.00495251	0.0048798	1	1.12763	7.16709	7.19553	6.3559	6.38112	1.00397
Q5M775	CYTSB_HUMAN	SPECC1	Cytospin-B	520054	609052	615046	563227	0.000586148	0.00362381	0.00154786	0.000914609	0.101684	0.987617	0.122099	0.0711489	0.853875	0.845553	0.923348	0.990254	1.08136	1.092
Q9UQ16	DYN3_HUMAN	DNM3	Dynamin-3	882427	749164	678658	763249	0.00163424	0.00777029	0.0249776	0.00092607	0.0535533	0.263783	0.970641	0.135056	1.17788	1.30025	1.15615	1.10389	0.981546	0.889171
Q96RT1	ERBIN_HUMAN	ERBIN	Erbin	230555	276805	300345	292680	0.000784111	0.0045141	0.0150084	0.000927612	0.00219142	0.3912	0.684378	0.951201	0.832913	0.767634	0.787735	0.921625	0.945759	1.02619
O95140	MFN2_HUMAN	MFN2	Mitofusin-2	837878	949044	1.09826e+06	1.1855e+06	9.46495e-05	0.000940659	0.117716	0.00092999	0.000102526	0.0622237	0.00490713	0.488953	0.882866	0.762917	0.706771	0.864138	0.800542	0.926406
Q16643	DREB_HUMAN	DBN1	Drebrin	1.69727e+06	2.00536e+06	2.07557e+06	2.09127e+06	0.000404429	0.00274141	0.00460792	0.000931629	0.000667093	0.772279	0.65403	0.996542	0.846367	0.817737	0.811601	0.966173	0.958922	0.992496
O60613	SEP15_HUMAN	SELENOF	Selenoprotein F	32368.4	48141.7	55176.9	55948.2	0.000504873	0.00324267	0.0105153	0.000931912	0.000873945	0.500149	0.47799	0.999975	0.672358	0.58663	0.578543	0.872497	0.860469	0.986214
P43121	MUC18_HUMAN	MCAM	Cell surface glycoprotein MUC18	1.58208e+06	1.80977e+06	1.88693e+06	1.6604e+06	0.000764577	0.00443253	0.00798645	0.000935519	0.472214	0.591952	0.105334	0.0115364	0.874186	0.838439	0.952829	0.959108	1.08996	1.13643
Q9BUE6	ISCA1_HUMAN	ISCA1	Iron-sulfur cluster assembly 1 homolog, mitochondrial	114699	135773	180049	135667	0.00166292	0.00787267	0.214648	0.000935748	0.208525	0.0323063	0.999997	0.033411	0.844784	0.637042	0.845445	0.754089	1.00078	1.32714
Q8N163	CCAR2_HUMAN	CCAR2	Cell cycle and apoptosis regulator protein 2	864416	938448	972130	999303	0.000166445	0.00142492	0.0140804	0.000939412	0.000142526	0.413448	0.0625682	0.617128	0.921112	0.889197	0.865018	0.965352	0.939102	0.972808
Q5TAQ9	DCAF8_HUMAN	DCAF8	DDB1- and CUL4-associated factor 8	141580	163230	181193	187785	0.000253263	0.00195768	0.0415087	0.00094549	0.000294407	0.174017	0.0503068	0.875234	0.867369	0.781378	0.753951	0.90086	0.869239	0.964899
P07942	LAMB1_HUMAN	LAMB1	Laminin subunit beta-1	583475	735541	701180	505375	4.94298e-07	1.77544e-05	0.000115563	0.000957948	0.00656068	0.525755	8.06437e-07	3.56988e-06	0.793259	0.832133	1.15454	1.049	1.45544	1.38745
P17812	PYRG1_HUMAN	CTPS1	CTP synthase 1	1.93896e+06	1.77848e+06	1.76175e+06	1.61857e+06	4.37414e-06	9.54081e-05	0.0022536	0.000958986	1.9746e-06	0.952203	0.00111096	0.00262537	1.09023	1.10059	1.19795	1.0095	1.0988	1.08846
P27348	1433T_HUMAN	YWHAQ	14-3-3 protein theta	4.10249e+06	4.83951e+06	5.05803e+06	5.66407e+06	2.91486e-05	0.000386059	0.00586455	0.000960561	1.55476e-05	0.705102	0.00854442	0.0566734	0.847708	0.811085	0.7243	0.956798	0.854422	0.893002
Q9GZT3	SLIRP_HUMAN	SLIRP	SRA stem-loop-interacting RNA-binding protein, mitochondrial	986751	1.20118e+06	1.35061e+06	1.39969e+06	0.000345094	0.00245246	0.0278615	0.000964612	0.000438651	0.250084	0.114981	0.957421	0.821487	0.730599	0.704978	0.889362	0.858173	0.964932
Q5BJF6	ODFP2_HUMAN	ODF2	Outer dense fiber protein 2	33225.4	46495.8	60765.4	58913.1	0.000640516	0.00386591	0.0556713	0.000969368	0.00143599	0.136348	0.199225	0.994723	0.714591	0.546782	0.563973	0.765169	0.789226	1.03144
Q9BRN9	TM2D3_HUMAN	TM2D3	TM2 domain-containing protein 3	47956.2	109601	123791	139659	0.000299194	0.00221431	0.00286949	0.000975453	0.000415454	0.91164	0.639478	0.946765	0.437554	0.387397	0.34338	0.885371	0.784773	0.886378
Q05209	PTN12_HUMAN	PTPN12	Tyrosine-protein phosphatase non-receptor type 12	178995	189307	207618	196979	0.0014282	0.00702829	0.235466	0.000978576	0.0225545	0.0304173	0.517378	0.30052	0.945525	0.862133	0.908698	0.911804	0.961051	1.05401
Q13526	PIN1_HUMAN	PIN1	Peptidyl-prolyl cis-trans isomerase NIMA-interacting 1	771514	901763	993505	1.07479e+06	0.000107422	0.00104008	0.0354385	0.000998265	8.68892e-05	0.210571	0.0136269	0.403514	0.855562	0.776558	0.717829	0.907658	0.839015	0.924373
P02461	CO3A1_HUMAN	COL3A1	Collagen alpha-1(III) chain	501368	595919	630253	880745	1.86698e-07	8.52787e-06	0.00868476	0.00100675	1.0607e-07	0.590443	5.73839e-06	2.78761e-05	0.841335	0.795502	0.569254	0.945524	0.676608	0.715591
Q13618	CUL3_HUMAN	CUL3	Cullin-3	323393	373420	369679	437536	6.29948e-07	2.09212e-05	0.000526386	0.00101011	2.81179e-07	0.975446	0.000220969	0.000121284	0.866029	0.874794	0.739123	1.01012	0.853462	0.844911
O43251	RFOX2_HUMAN	RBFOX2	RNA binding protein fox-1 homolog 2	230171	258013	288805	285690	0.000637439	0.00385438	0.0978487	0.00101942	0.00157351	0.0829393	0.128852	0.992998	0.89209	0.796976	0.805666	0.893381	0.903122	1.0109
O75306	NDUS2_HUMAN	NDUFS2	NADH dehydrogenase [ubiquinone] iron-sulfur protein 2, mitochondrial	610915	653161	704816	690192	0.000947756	0.0051938	0.118173	0.00102883	0.00380159	0.068983	0.243752	0.858267	0.93532	0.866773	0.885137	0.926713	0.946347	1.02119
Q5TFE4	NT5D1_HUMAN	NT5DC1	5'-nucleotidase domain-containing protein 1	294423	337950	353149	419577	2.83843e-06	6.67587e-05	0.0082078	0.00102932	1.39447e-06	0.617426	0.000207239	0.00142108	0.871204	0.833708	0.701714	0.95696	0.805453	0.841679
P30040	ERP29_HUMAN	ERP29	Endoplasmic reticulum resident protein 29	2.153e+06	2.87599e+06	2.92795e+06	2.85464e+06	0.000535168	0.00339285	0.00161975	0.00103058	0.00237303	0.992129	0.995459	0.955621	0.74861	0.735324	0.754209	0.982252	1.00748	1.02568
P60174	TPIS_HUMAN	TPI1	Triosephosphate isomerase	1.2119e+07	1.49391e+07	1.58702e+07	1.94385e+07	9.20381e-06	0.00016711	0.00739452	0.00103229	4.50302e-06	0.653554	0.00119133	0.0086237	0.811227	0.763629	0.623451	0.941326	0.768529	0.816432
Q8IWA5	CTL2_HUMAN	SLC44A2	Choline transporter-like protein 2	269490	308915	353387	334846	0.00116197	0.00602312	0.0844737	0.00103234	0.00550258	0.0973476	0.428006	0.750863	0.872374	0.76259	0.804816	0.874155	0.922559	1.05537
Q05639	EF1A2_HUMAN	EEF1A2	Elongation factor 1-alpha 2	1.05085e+08	1.44408e+08	1.71592e+08	1.58379e+08	0.00114303	0.00595295	0.0251726	0.00103831	0.00457934	0.289904	0.763548	0.809135	0.727698	0.612415	0.663505	0.841578	0.911785	1.08342
O95478	NSA2_HUMAN	NSA2	Ribosome biogenesis protein NSA2 homolog	1.11102e+06	957154	969848	841861	2.04618e-06	5.26195e-05	0.000474222	0.00103934	9.14273e-07	0.958375	0.00162765	0.000730061	1.16075	1.14556	1.31972	0.986911	1.13695	1.15203
Q86TB9	PATL1_HUMAN	PATL1	Protein PAT1 homolog 1	235626	201990	197263	199125	0.000594605	0.00365898	0.00338606	0.00104128	0.00165272	0.890098	0.972298	0.991635	1.16652	1.19448	1.18331	1.02396	1.01439	0.990653
O43294	TGFI1_HUMAN	TGFB1I1	Transforming growth factor beta-1-induced transcript 1 protein	689350	600103	566584	532546	0.000120296	0.00112848	0.0134446	0.00104882	8.76742e-05	0.463285	0.0363207	0.391423	1.14872	1.21668	1.29444	1.05916	1.12686	1.06392
Q5JSH3	WDR44_HUMAN	WDR44	WD repeat-containing protein 44	263007	293827	320235	391481	1.55686e-06	4.26943e-05	0.0524382	0.00104997	1.00406e-06	0.155961	3.03899e-05	0.00083603	0.895107	0.821294	0.671825	0.917537	0.750553	0.818008
P20618	PSB1_HUMAN	PSMB1	Proteasome subunit beta type-1	3.30348e+06	4.00017e+06	4.31335e+06	4.37008e+06	0.000488302	0.00316928	0.0128949	0.00105614	0.000717901	0.478603	0.355603	0.994774	0.825835	0.765873	0.755931	0.927393	0.915354	0.987019
Q96F45	ZN503_HUMAN	ZNF503	Zinc finger protein 503	43506.2	81568	144880	199057	0.000124697	0.00115747	0.125909	0.00105669	0.000140234	0.0664	0.00666113	0.568057	0.533374	0.300291	0.218562	0.563002	0.409772	0.727834
Q96AB3	ISOC2_HUMAN	ISOC2	Isochorismatase domain-containing protein 2	39437.1	67522.7	70574.6	63238.5	0.00070272	0.00415409	0.00193984	0.00105785	0.00533499	0.981787	0.930464	0.768819	0.584057	0.5588	0.623625	0.956756	1.06775	1.11601
Q01518	CAP1_HUMAN	CAP1	Adenylyl cyclase-associated protein 1	3.6978e+06	4.44843e+06	4.69932e+06	4.92065e+06	0.00023436	0.00183083	0.00733495	0.00106622	0.000219981	0.667907	0.187453	0.742016	0.83126	0.78688	0.751487	0.946611	0.904033	0.955021
Q9NQT4	EXOS5_HUMAN	EXOSC5	Exosome complex component RRP46	442764	605103	589671	509363	0.000333292	0.00239167	0.000505932	0.00107434	0.0997406	0.96314	0.0380477	0.085916	0.731717	0.750866	0.86925	1.02617	1.18796	1.15766
P29401	TKT_HUMAN	TKT	Transketolase	3.79541e+07	4.8076e+07	5.54217e+07	6.06824e+07	0.000181927	0.00151264	0.0342218	0.00108158	0.000165523	0.233612	0.0310732	0.626142	0.789461	0.684824	0.625455	0.867457	0.792255	0.913308
P30307	MPIP3_HUMAN	CDC25C	M-phase inducer phosphatase 3	31303.7	32504.2	43750.5	62518.5	5.65969e-07	1.93808e-05	0.898385	0.00108323	9.55816e-07	0.00340389	1.97662e-06	0.000751061	0.963065	0.715504	0.50071	0.742945	0.519914	0.699801
Q6ZU35	CRACD_HUMAN	CRACD	Capping protein-inhibiting regulator of actin dynamics	30533.8	47279.6	50130.4	47928.3	0.000630099	0.00382399	0.00285432	0.00108403	0.00209077	0.934184	0.997584	0.977242	0.645814	0.609089	0.637073	0.943133	0.986465	1.04595
P55789	ALR_HUMAN	GFER	FAD-linked sulfhydryl oxidase ALR	132015	175080	198472	177327	0.00142398	0.00701795	0.0150106	0.00108619	0.0106251	0.441274	0.997112	0.550699	0.754028	0.665156	0.744473	0.882136	0.987328	1.11925
O14672	ADA10_HUMAN	ADAM10	Disintegrin and metalloproteinase domain-containing protein 10	722546	823012	1.00364e+06	945693	0.000935923	0.0051632	0.230723	0.00108918	0.00485644	0.0349927	0.157981	0.806777	0.877929	0.719929	0.764039	0.820031	0.870274	1.06127
O14737	PDCD5_HUMAN	PDCD5	Programmed cell death protein 5	908254	1.29306e+06	1.36187e+06	1.39424e+06	0.000439073	0.00293411	0.00310812	0.00109685	0.000795986	0.920392	0.83934	0.997012	0.702405	0.666916	0.651433	0.949474	0.927432	0.976786
O95263	PDE8B_HUMAN	PDE8B	High affinity cAMP-specific and IBMX-insensitive 3',5'-cyclic phosphodiesterase 8B	106250	121801	138973	164565	1.58083e-05	0.000248164	0.0790282	0.00110046	1.11796e-05	0.110949	0.00046377	0.0308266	0.872323	0.764539	0.645641	0.876441	0.74014	0.844484
Q15165	PON2_HUMAN	PON2	Serum paraoxonase/arylesterase 2	1.10684e+06	1.74372e+06	1.73722e+06	1.82842e+06	0.000267049	0.00203567	0.0010544	0.0011045	0.000498487	0.999991	0.963587	0.957084	0.634757	0.637133	0.605353	1.00374	0.953675	0.950119
O95782	AP2A1_HUMAN	AP2A1	AP-2 complex subunit alpha-1	1.78477e+06	1.99068e+06	1.9886e+06	1.95298e+06	0.000538407	0.00340185	0.0010455	0.00110473	0.00457126	0.999985	0.811797	0.828561	0.89656	0.897497	0.913867	1.00105	1.0193	1.01824
Q6FIF0	ZFAN6_HUMAN	ZFAND6	AN1-type zinc finger protein 6	80685.6	102772	140522	172271	6.58658e-05	0.000711286	0.178207	0.00110763	7.01139e-05	0.0479225	0.00199981	0.302731	0.785093	0.574185	0.468364	0.73136	0.596572	0.815703
O14656	TOR1A_HUMAN	TOR1A	Torsin-1A	331224	438869	422723	378167	0.000254551	0.00196534	0.000287112	0.00111349	0.0583956	0.821306	0.0346786	0.14962	0.754722	0.783549	0.875867	1.0382	1.16052	1.11782
P49005	DPOD2_HUMAN	POLD2	DNA polymerase delta subunit 2	278058	304052	355648	396084	3.78761e-05	0.000459144	0.271618	0.00112907	4.27988e-05	0.0298877	0.000702023	0.174428	0.914505	0.781833	0.702016	0.854925	0.767645	0.89791
Q92917	GPKOW_HUMAN	GPKOW	G-patch domain and KOW motifs-containing protein	332474	371871	401856	406458	0.000488652	0.00316928	0.0417163	0.00113374	0.000718724	0.205902	0.131901	0.991532	0.894057	0.827346	0.81798	0.925384	0.914908	0.988679
Q9C0C2	TB182_HUMAN	TNKS1BP1	182 kDa tankyrase-1-binding protein	2.13315e+06	2.34429e+06	2.43756e+06	2.56746e+06	8.84259e-05	0.000889508	0.014813	0.00113657	5.82887e-05	0.460243	0.0196836	0.244557	0.909932	0.875116	0.83084	0.961737	0.913078	0.949406
Q53H80	AKIR2_HUMAN	AKIRIN2	Akirin-2	31948.6	162324	364495	407523	0.000410904	0.0027785	0.15434	0.00113963	0.000786043	0.0578704	0.0387834	0.995391	0.19682	0.0876516	0.078397	0.445338	0.398318	0.894416
Q9H9T3	ELP3_HUMAN	ELP3	Elongator complex protein 3	333303	285746	275148	282174	0.000917152	0.0050766	0.00627054	0.00114427	0.00334364	0.7442	0.982198	0.91457	1.16643	1.21136	1.18119	1.03852	1.01266	0.975099
Q3T8J9	GON4L_HUMAN	GON4L	GON-4-like protein	30239.9	36447.4	51908.4	44923	0.00134022	0.00669502	0.351847	0.00116473	0.0161133	0.0222045	0.282903	0.442692	0.829686	0.582563	0.67315	0.702148	0.811331	1.1555
Q86UP2	KTN1_HUMAN	KTN1	Kinectin	1.06287e+06	1.29814e+06	1.34616e+06	1.33879e+06	0.000608599	0.00371827	0.00441833	0.00116775	0.00132518	0.853858	0.887024	0.999821	0.818763	0.789553	0.793899	0.964324	0.969632	1.0055
Q9UJP4	KLH21_HUMAN	KLHL21	Kelch-like protein 21	34865.9	53351.8	61848.9	49300.3	0.00169707	0.00798285	0.0121331	0.00116804	0.0567708	0.532904	0.812979	0.160893	0.653509	0.563727	0.707214	0.862615	1.08218	1.25453
Q86SR1	GLT10_HUMAN	GALNT10	Polypeptide N-acetylgalactosaminyltransferase 10	98264.1	123764	145564	132338	0.00158897	0.00761528	0.0417763	0.00117944	0.0092943	0.213337	0.825156	0.624847	0.793964	0.675057	0.742526	0.850237	0.935214	1.09995
Q07960	RHG01_HUMAN	ARHGAP1	Rho GTPase-activating protein 1	731618	644393	614589	682904	0.00141877	0.00700542	0.0122331	0.00118543	0.234223	0.535424	0.339828	0.0376562	1.13536	1.19042	1.07133	1.0485	0.943608	0.899964
P61158	ARP3_HUMAN	ACTR3	Actin-related protein 3	2.16481e+06	2.40328e+06	2.69663e+06	2.844e+06	0.000150393	0.0013235	0.133692	0.00118815	0.000171926	0.0705161	0.0079627	0.607424	0.900773	0.802783	0.761183	0.891215	0.845033	0.94818
P63279	UBC9_HUMAN	UBE2I	SUMO-conjugating enzyme UBC9	2.50098e+06	2.83986e+06	3.34459e+06	3.63182e+06	0.000114657	0.00109238	0.178724	0.00118985	0.000134804	0.0515573	0.004348	0.510554	0.88067	0.747769	0.68863	0.849091	0.781939	0.920913
Q6UW02	CP20A_HUMAN	CYP20A1	Cytochrome P450 20A1	206725	155140	132299	119774	0.000213149	0.00173485	0.0300328	0.00120258	0.000190891	0.285847	0.0419371	0.644703	1.33251	1.56256	1.72596	1.17265	1.29527	1.10457
Q96HS1	PGAM5_HUMAN	PGAM5	Serine/threonine-protein phosphatase PGAM5, mitochondrial	2.50439e+06	2.19835e+06	2.15982e+06	1.88834e+06	5.04415e-06	0.000106507	0.00323694	0.00121299	2.29253e-06	0.932612	0.000979554	0.00259051	1.13921	1.15954	1.32623	1.01784	1.16417	1.14376
O43665	RGS10_HUMAN	RGS10	Regulator of G-protein signaling 10	39612.2	62682.3	61552.5	81074	2.69547e-05	0.000362819	0.00101752	0.00123146	1.46573e-05	0.999379	0.04912	0.0400373	0.631952	0.643551	0.488593	1.01835	0.773149	0.759213
P78337	PITX1_HUMAN	PITX1	Pituitary homeobox 1	58535.1	88126.6	111066	162674	2.80463e-05	0.000372954	0.030218	0.00124251	1.67404e-05	0.292557	0.00191004	0.04767	0.664216	0.527032	0.359831	0.793465	0.541737	0.682749
P11498	PYC_HUMAN	PC	Pyruvate carboxylase, mitochondrial	1.77626e+06	1.54936e+06	1.56027e+06	1.44401e+06	2.79925e-05	0.000372954	0.000836844	0.00124326	1.57673e-05	0.994498	0.0669442	0.0438619	1.14645	1.13843	1.23009	0.993006	1.07296	1.08051
P53041	PPP5_HUMAN	PPP5C	Serine/threonine-protein phosphatase 5	542079	613872	626727	671172	5.82576e-05	0.000646015	0.00395502	0.00124992	3.31677e-05	0.898364	0.0358498	0.116189	0.883049	0.864936	0.807659	0.979488	0.914626	0.93378
Q8WVV9	HNRLL_HUMAN	HNRNPLL	Heterogeneous nuclear ribonucleoprotein L-like	255850	301439	311252	308357	0.000767244	0.0044441	0.00511993	0.0012646	0.00198085	0.836759	0.941353	0.992502	0.848764	0.822003	0.829721	0.968471	0.977565	1.00939
P00167	CYB5_HUMAN	CYB5A	Cytochrome b5	666475	828066	949710	1.04031e+06	0.000210606	0.00172051	0.0385613	0.00126555	0.000190079	0.24354	0.0325115	0.624692	0.804857	0.701767	0.640651	0.871915	0.795981	0.912911
Q8NFC6	BD1L1_HUMAN	BOD1L1	Biorientation of chromosomes in cell division protein 1-like 1	126675	151698	173398	214231	1.59306e-05	0.000248901	0.050803	0.00127418	1.00068e-05	0.193211	0.000602322	0.0224415	0.835044	0.730541	0.591298	0.874853	0.708103	0.809397
Q9NXG6	P4HTM_HUMAN	P4HTM	Transmembrane prolyl 4-hydroxylase	183782	333603	389672	497766	0.000152195	0.0013358	0.00957013	0.00128392	0.000109306	0.645519	0.0665402	0.40705	0.550901	0.471632	0.369214	0.856111	0.6702	0.782842
Q6GMV3	PTRD1_HUMAN	PTRHD1	Putative peptidyl-tRNA hydrolase PTRHD1	33512.8	50909.4	64358.8	51928.5	0.00202494	0.00911018	0.0345748	0.00128846	0.0200343	0.27082	0.988962	0.410516	0.658283	0.520718	0.645364	0.791024	0.980375	1.23937
P23458	JAK1_HUMAN	JAK1	Tyrosine-protein kinase JAK1	128963	158776	179724	187432	0.000437406	0.00292889	0.0334272	0.00129947	0.000524977	0.280414	0.117201	0.939499	0.81223	0.717559	0.688051	0.883442	0.847113	0.958878
Q75N03	HAKAI_HUMAN	CBLL1	E3 ubiquitin-protein ligase Hakai	127306	165559	168783	170340	0.00050928	0.00326463	0.00272292	0.00130325	0.00101764	0.969313	0.930763	0.998657	0.768947	0.75426	0.747366	0.980899	0.971933	0.99086
Q9NUP9	LIN7C_HUMAN	LIN7C	Protein lin-7 homolog C	513094	575750	659747	681837	0.000326983	0.0023592	0.140361	0.00131708	0.000477167	0.0745788	0.0247007	0.917522	0.891176	0.777714	0.752518	0.872684	0.84441	0.967602
Q9UH65	SWP70_HUMAN	SWAP70	Switch-associated protein 70	581873	651033	666766	673292	0.000532894	0.00338318	0.00609092	0.0013279	0.000791793	0.801873	0.622394	0.987986	0.893769	0.87268	0.864221	0.976404	0.966939	0.990307
Q1ED39	KNOP1_HUMAN	KNOP1	Lysine-rich nucleolar protein 1	311882	352053	369667	352545	0.00175835	0.00818954	0.0152316	0.00134211	0.0142753	0.507737	0.999981	0.528631	0.885897	0.843684	0.884661	0.952351	0.998605	1.04857
Q9H9L3	I20L2_HUMAN	ISG20L2	Interferon-stimulated 20 kDa exonuclease-like 2	133777	164135	172112	169138	0.000881988	0.00490662	0.00675517	0.00134979	0.00226204	0.775889	0.915834	0.988846	0.815038	0.777266	0.790934	0.953656	0.970426	1.01758
Q9UNS1	TIM_HUMAN	TIMELESS	Protein timeless homolog	95318.3	106498	120247	134525	4.23502e-05	0.000504473	0.137559	0.0013664	3.5924e-05	0.0791395	0.00116413	0.117284	0.895024	0.792685	0.708556	0.885657	0.791661	0.893868
Q8WU90	ZC3HF_HUMAN	ZC3H15	Zinc finger CCCH domain-containing protein 15	1.15165e+06	1.36225e+06	1.43868e+06	1.44117e+06	0.000763119	0.00442797	0.012818	0.00137041	0.00132814	0.571292	0.560195	0.999997	0.845401	0.800486	0.799107	0.946872	0.94524	0.998277
P11171	EPB41_HUMAN	EPB41	Protein 4.1	136288	156174	169393	180763	0.000175875	0.00147883	0.0347407	0.00137435	0.000142077	0.28529	0.0254632	0.481586	0.872664	0.804566	0.753958	0.921965	0.863973	0.9371
Q12874	SF3A3_HUMAN	SF3A3	Splicing factor 3A subunit 3	1.46189e+06	1.78369e+06	1.84728e+06	1.7379e+06	0.00130179	0.00656255	0.00471033	0.00139065	0.0126349	0.883847	0.939297	0.581266	0.819587	0.791377	0.841184	0.965579	1.02635	1.06294
Q13177	PAK2_HUMAN	PAK2	Serine/threonine-protein kinase PAK 2	660146	687667	827381	852660	0.000149884	0.00132133	0.801629	0.00139386	0.000523023	0.00641645	0.00226011	0.925616	0.959979	0.797874	0.774219	0.831136	0.806495	0.970352
A1L0T0	HACL2_HUMAN	ILVBL	2-hydroxyacyl-CoA lyase 2	363330	444360	490138	446749	0.00203406	0.00913875	0.023282	0.00139885	0.0184575	0.392811	0.999122	0.461392	0.817648	0.741281	0.813274	0.906602	0.994651	1.09712
O95235	KI20A_HUMAN	KIF20A	Kinesin-like protein KIF20A	256325	280296	344133	405908	1.66122e-05	0.000255326	0.43268	0.00141292	1.96414e-05	0.0205133	0.000165796	0.0517461	0.914481	0.744843	0.631487	0.814498	0.690541	0.847812
Q96HP4	OXND1_HUMAN	OXNAD1	Oxidoreductase NAD-binding domain-containing protein 1	146197	174901	202409	185506	0.00200577	0.00907333	0.0635169	0.00141332	0.0131192	0.174387	0.80247	0.57453	0.835883	0.722285	0.788095	0.864099	0.94283	1.09111
O94763	RMP_HUMAN	URI1	Unconventional prefoldin RPB5 interactor 1	81913	111634	116333	124088	0.000330063	0.00237365	0.00378617	0.00143494	0.000360798	0.935829	0.492393	0.818724	0.733767	0.704127	0.660121	0.959606	0.899633	0.937503
O43707	ACTN4_HUMAN	ACTN4	Alpha-actinin-4	1.87379e+07	2.30308e+07	2.61459e+07	2.40367e+07	0.00200126	0.00905914	0.0468964	0.00143635	0.0124068	0.231284	0.870397	0.598836	0.813603	0.716666	0.779553	0.880855	0.95815	1.08775
Q14195	DPYL3_HUMAN	DPYSL3	Dihydropyrimidinase-related protein 3	1.29179e+06	1.43141e+06	1.58518e+06	1.61691e+06	0.000454013	0.0030096	0.10985	0.00143825	0.000668688	0.105076	0.0468285	0.962849	0.902463	0.81492	0.798928	0.902995	0.885275	0.980376
Q96CP2	FWCH2_HUMAN	FLYWCH2	FLYWCH family member 2	409071	469153	502725	567185	3.6701e-05	0.00044835	0.0256028	0.00144369	2.12527e-05	0.375737	0.00306545	0.0562668	0.871935	0.813707	0.72123	0.93322	0.82716	0.88635
P17301	ITA2_HUMAN	ITGA2	Integrin alpha-2	268204	228623	223476	165858	1.5558e-07	7.50532e-06	0.00403316	0.00144636	8.42664e-08	0.9258	7.08855e-06	1.49472e-05	1.17313	1.20015	1.61707	1.02303	1.37843	1.34739
O75718	CRTAP_HUMAN	CRTAP	Cartilage-associated protein	1.4951e+06	1.76459e+06	1.81569e+06	1.7454e+06	0.00123843	0.00632032	0.0049892	0.00145117	0.00764554	0.880773	0.994385	0.761305	0.847278	0.823435	0.856594	0.97186	1.011	1.04027
Q15047	SETB1_HUMAN	SETDB1	Histone-lysine N-methyltransferase SETDB1	110488	118273	135002	139775	0.000216305	0.00174977	0.356249	0.00146129	0.000388461	0.0278709	0.00647981	0.836687	0.934178	0.818414	0.790469	0.87608	0.846166	0.965855
P41221	WNT5A_HUMAN	WNT5A	Protein Wnt-5a	352623	379811	433674	407224	0.001785	0.00827863	0.353021	0.00149104	0.0204481	0.0288252	0.339614	0.450982	0.928418	0.813107	0.865921	0.875798	0.932684	1.06495
Q9H1K1	ISCU_HUMAN	ISCU	Iron-sulfur cluster assembly enzyme ISCU, mitochondrial	148370	182784	201144	197849	0.00117229	0.00605758	0.0219667	0.00149293	0.00279544	0.429866	0.642694	0.980784	0.811726	0.737633	0.749917	0.908722	0.923855	1.01665
Q96IP4	TET5A_HUMAN	TENT5A	Terminal nucleotidyltransferase 5A	32261.8	33946.6	46013.4	57022.9	9.76295e-06	0.000173128	0.887481	0.00149759	1.90603e-05	0.00501215	4.89102e-05	0.0467175	0.95037	0.701139	0.565769	0.737754	0.595315	0.806928
P04216	THY1_HUMAN	THY1	Thy-1 membrane glycoprotein	165589	236967	293601	257415	0.00197196	0.00897569	0.0429992	0.00150234	0.010561	0.258943	0.851815	0.668554	0.698785	0.563993	0.643277	0.807106	0.920564	1.14057
Q15025	TNIP1_HUMAN	TNIP1	TNFAIP3-interacting protein 1	122242	95583.5	84206.6	74138	0.000146299	0.00130661	0.0279608	0.00150257	0.000105482	0.363366	0.0219911	0.348456	1.2789	1.45169	1.64884	1.13511	1.28926	1.13581
P33981	TTK_HUMAN	TTK	Dual specificity protein kinase TTK	65565.5	81348.1	86719.8	112229	6.70497e-06	0.000130569	0.0101837	0.00151041	3.2645e-06	0.682497	0.000565253	0.00354083	0.805987	0.756062	0.584212	0.938057	0.724841	0.772704
Q15650	TRIP4_HUMAN	TRIP4	Activating signal cointegrator 1	198644	227880	236830	227855	0.00160017	0.00765785	0.0097135	0.00153025	0.00942402	0.702611	0.999998	0.712486	0.871704	0.838764	0.871802	0.962212	1.00011	1.03939
P09913	IFIT2_HUMAN	IFIT2	Interferon-induced protein with tetratricopeptide repeats 2	1.80041e+06	1.51002e+06	1.42386e+06	128473	1.32652e-15	4.38348e-12	0.0128959	0.00153033	3.21965e-14	0.608494	4.27436e-14	4.95159e-14	1.19231	1.26446	14.014	1.06051	11.7536	11.083
P13010	XRCC5_HUMAN	XRCC5	X-ray repair cross-complementing protein 5	7.00852e+06	7.51198e+06	8.28438e+06	9.03646e+06	3.45671e-05	0.000433622	0.208321	0.00153124	3.17619e-05	0.0566062	0.000655139	0.0895881	0.932979	0.845992	0.775583	0.906764	0.831297	0.916773
P52294	IMA5_HUMAN	KPNA1	Importin subunit alpha-5	566222	499379	486349	466240	0.000221142	0.00178018	0.00616574	0.00153751	0.000173503	0.84218	0.17067	0.519974	1.13385	1.16423	1.21444	1.02679	1.07108	1.04313
Q14534	ERG1_HUMAN	SQLE	Squalene monooxygenase	30796.7	57817.3	97255	94539.2	0.000818256	0.00465167	0.129019	0.00154577	0.00172883	0.0959758	0.107411	0.99988	0.532656	0.31666	0.325756	0.594492	0.61157	1.02873
P53801	PTTG_HUMAN	PTTG1IP	Pituitary tumor-transforming gene 1 protein-interacting protein	779695	566352	558824	524295	0.000273356	0.0020647	0.00216472	0.00155822	0.000299608	0.997061	0.612551	0.727174	1.3767	1.39524	1.48713	1.01347	1.08022	1.06586
P15923	TFE2_HUMAN	TCF3	Transcription factor E2-alpha	48897.9	60331.9	73691.3	93849.8	3.281e-05	0.000418067	0.0862751	0.00157112	2.31558e-05	0.145225	0.00106927	0.0577641	0.810482	0.663551	0.521023	0.818711	0.642856	0.785205
Q96FK6	WDR89_HUMAN	WDR89	WD repeat-containing protein 89	60626.4	78557.9	84891.4	76544.1	0.00203839	0.00915177	0.0128195	0.00159049	0.0211219	0.624181	0.991506	0.462162	0.771741	0.714164	0.792045	0.925392	1.02631	1.10905
O15061	SYNEM_HUMAN	SYNM	Synemin	622958	696937	734190	740984	0.00076269	0.00442797	0.024481	0.00159099	0.00110361	0.417945	0.312244	0.995796	0.89385	0.848497	0.840717	0.94926	0.940557	0.990831
O43414	ERI3_HUMAN	ERI3	ERI1 exoribonuclease 3	349327	422809	471857	512668	0.000221702	0.00178251	0.0401347	0.00159594	0.000183676	0.288647	0.0299841	0.529137	0.826205	0.740324	0.68139	0.896053	0.824723	0.920395
Q96B97	SH3K1_HUMAN	SH3KBP1	SH3 domain-containing kinase-binding protein 1	60489.6	75477.1	83786.2	77661.6	0.00211354	0.00942535	0.0276995	0.0016058	0.012638	0.38541	0.968782	0.63234	0.801429	0.721951	0.778887	0.90083	0.971872	1.07886
O75128	COBL_HUMAN	COBL	Protein cordon-bleu	154854	198978	202032	228093	8.43929e-05	0.000854139	0.00253932	0.00160691	5.17137e-05	0.992299	0.0990293	0.15485	0.778247	0.766482	0.678907	0.984883	0.872354	0.885743
O75717	WDHD1_HUMAN	WDHD1	WD repeat and HMG-box DNA-binding protein 1	4.70792e+06	5.44374e+06	5.54526e+06	5.77499e+06	0.00026788	0.00203884	0.00446487	0.00161172	0.000235662	0.927845	0.305661	0.623172	0.864832	0.848999	0.815226	0.981692	0.942641	0.96022
Q9UKF7	PITC1_HUMAN	PITPNC1	Cytoplasmic phosphatidylinositol transfer protein 1	78830.2	111268	113233	103917	0.0010744	0.00570795	0.00237097	0.00161429	0.0116578	0.995369	0.790185	0.661108	0.708469	0.696177	0.758591	0.98265	1.07075	1.08965
Q07021	C1QBP_HUMAN	C1QBP	Complement component 1 Q subcomponent-binding protein, mitochondrial	2.44322e+06	4.38268e+06	4.84539e+06	4.58036e+06	0.00111625	0.00587549	0.0076205	0.0016153	0.00310211	0.796785	0.951433	0.978704	0.557471	0.504235	0.533412	0.904504	0.956842	1.05786
P63104	1433Z_HUMAN	YWHAZ	14-3-3 protein zeta/delta	9.34773e+06	1.15001e+07	1.24992e+07	1.28764e+07	0.000569304	0.00354287	0.0174014	0.00161563	0.000665283	0.52875	0.263095	0.944597	0.812838	0.747865	0.725958	0.920067	0.893116	0.970708
Q86XP3	DDX42_HUMAN	DDX42	ATP-dependent RNA helicase DDX42	797832	894909	920727	924783	0.000795445	0.00454766	0.00888165	0.00162451	0.00132943	0.751756	0.682794	0.999306	0.891523	0.866524	0.862723	0.971959	0.967697	0.995614
Q13263	TIF1B_HUMAN	TRIM28	Transcription intermediary factor 1-beta	2.96879e+06	3.52864e+06	4.03261e+06	4.29451e+06	0.000309093	0.00226977	0.0828623	0.0016463	0.000325629	0.157817	0.0279892	0.739195	0.84134	0.736194	0.691299	0.875026	0.821664	0.939017
P04075	ALDOA_HUMAN	ALDOA	Fructose-bisphosphate aldolase A	2.5675e+07	3.01407e+07	3.88105e+07	3.46448e+07	0.00202234	0.00910466	0.252658	0.00165471	0.0164357	0.0490313	0.395302	0.555694	0.85184	0.661548	0.741093	0.776611	0.869992	1.12024
P62937	PPIA_HUMAN	PPIA	Peptidyl-prolyl cis-trans isomerase A	4.31487e+07	5.35032e+07	6.86496e+07	6.72853e+07	0.000977493	0.00532146	0.173517	0.00165497	0.00249802	0.0752166	0.113705	0.994358	0.806469	0.628535	0.64128	0.779367	0.79517	1.02028
Q9UBT2	SAE2_HUMAN	UBA2	SUMO-activating enzyme subunit 2	1.48086e+06	1.6886e+06	1.69524e+06	1.89114e+06	1.20972e-05	0.000203954	0.00194581	0.00166113	5.56383e-06	0.999667	0.00605127	0.00713954	0.876973	0.873538	0.783052	0.996083	0.892903	0.896415
Q6UW63	PLGT2_HUMAN	POGLUT2	Protein O-glucosyltransferase 2	320715	370033	362037	395415	1.76796e-05	0.000267378	0.000416694	0.0016724	1.00538e-05	0.819084	0.0766984	0.0168862	0.866719	0.885861	0.811084	1.02208	0.935809	0.915588
P55072	TERA_HUMAN	VCP	Transitional endoplasmic reticulum ATPase	8.73566e+06	1.00046e+07	1.17576e+07	1.08892e+07	0.00211769	0.00943751	0.183629	0.00167272	0.014668	0.0714731	0.47275	0.597154	0.873162	0.742978	0.802234	0.850905	0.918768	1.07975
P01130	LDLR_HUMAN	LDLR	Low-density lipoprotein receptor	402364	394261	325494	201462	4.79117e-09	5.02616e-07	0.971234	0.00167462	9.2533e-09	0.00346586	1.25323e-08	5.73323e-07	1.02055	1.23617	1.99722	1.21127	1.957	1.61566
Q9Y617	SERC_HUMAN	PSAT1	Phosphoserine aminotransferase	1.15941e+06	1.34268e+06	1.40714e+06	1.41087e+06	0.000852184	0.0047812	0.011766	0.00168135	0.00138376	0.672374	0.603222	0.999366	0.863506	0.823949	0.821771	0.954191	0.951669	0.997356
Q9ULV3	CIZ1_HUMAN	CIZ1	Cip1-interacting zinc finger protein	223680	276740	319156	320121	0.000997093	0.00539704	0.0510966	0.00168437	0.00178343	0.247897	0.260622	0.999984	0.808269	0.700848	0.698735	0.867098	0.864484	0.996985
O60664	PLIN3_HUMAN	PLIN3	Perilipin-3	1.27674e+06	1.65066e+06	1.76692e+06	2.06978e+06	8.23917e-05	0.000840319	0.00886343	0.00169849	4.68567e-05	0.767059	0.0248649	0.1306	0.773474	0.72258	0.616849	0.934201	0.797504	0.853675
Q8IXS6	PALM2_HUMAN	PALM2	Paralemmin-2	476061	590921	594195	618074	0.000319849	0.0023204	0.00192393	0.00170292	0.000397413	0.999847	0.759053	0.798059	0.805625	0.801187	0.770233	0.994492	0.956069	0.961365
Q96EH3	MASU1_HUMAN	MALSU1	Mitochondrial assembly of ribosomal large subunit protein 1	164195	222254	236316	201272	0.001867	0.00857472	0.00698172	0.00170943	0.0664265	0.838661	0.583683	0.200118	0.738774	0.694812	0.815789	0.940493	1.10425	1.17412
Q86WQ0	NR2CA_HUMAN	NR2C2AP	Nuclear receptor 2C2-associated protein	33596.1	67869	96119.9	90769.2	0.00118542	0.00610157	0.05906	0.00171989	0.00247217	0.223138	0.305187	0.99612	0.495014	0.349522	0.370126	0.706086	0.747709	1.05895
Q9NXR1	NDE1_HUMAN	NDE1	Nuclear distribution protein nudE homolog 1	132416	151191	160499	153020	0.00230168	0.0100342	0.027322	0.00172236	0.014674	0.410543	0.983958	0.60736	0.875821	0.825028	0.865352	0.942006	0.988047	1.04888
Q8NBK3	SUMF1_HUMAN	SUMF1	Formylglycine-generating enzyme	257028	326778	320340	415801	1.96988e-06	5.10546e-05	0.000872306	0.00173162	8.79774e-07	0.973602	0.000817714	0.000422121	0.786554	0.802361	0.618152	1.0201	0.7859	0.770417
O60826	CCD22_HUMAN	CCDC22	Coiled-coil domain-containing protein 22	238541	286859	287462	299880	0.000279493	0.00209192	0.00194621	0.0017331	0.000309144	0.999869	0.66196	0.702351	0.831561	0.829817	0.795455	0.997903	0.95658	0.958591
Q96T37	RBM15_HUMAN	RBM15	RNA-binding protein 15	918877	824998	825937	725654	1.71126e-06	4.61621e-05	0.00156937	0.00173928	7.6925e-07	0.999907	0.00037741	0.000343112	1.11379	1.11253	1.26627	0.998864	1.1369	1.1382
Q9HD15	SRA1_HUMAN	SRA1	Steroid receptor RNA activator 1	306467	352619	380427	432491	4.1135e-05	0.000492502	0.0319196	0.00174786	2.39359e-05	0.371062	0.00289741	0.0540186	0.869116	0.805587	0.70861	0.926904	0.815322	0.879619
P01008	ANT3_HUMAN	SERPINC1	Antithrombin-III	429463	341831	305679	223942	6.67362e-06	0.000130491	0.0302889	0.00177397	3.66493e-06	0.390002	0.000255176	0.0035718	1.25636	1.40495	1.91774	1.11827	1.52643	1.36499
Q86W92	LIPB1_HUMAN	PPFIBP1	Liprin-beta-1	297644	320581	344080	311039	0.00272354	0.0113349	0.109841	0.00181464	0.479013	0.132337	0.738494	0.0230156	0.928453	0.865042	0.956935	0.931703	1.03068	1.10623
P41567	EIF1_HUMAN	EIF1	Eukaryotic translation initiation factor 1	32524	529671	1.1572e+06	1.20999e+06	0.000840784	0.00474124	0.153975	0.00182333	0.00164402	0.0943404	0.0849438	0.999906	0.0614042	0.0281059	0.0268795	0.457719	0.437747	0.956368
P61968	LMO4_HUMAN	LMO4	LIM domain transcription factor LMO4	37631.8	75232.8	99550.3	145053	0.0001545	0.00134709	0.0346694	0.00183902	0.000108148	0.363185	0.0182773	0.302328	0.500205	0.378018	0.259435	0.755727	0.518657	0.686303
Q86TG7	PEG10_HUMAN	PEG10	Retrotransposon-derived protein PEG10	549242	586571	712296	1.02722e+06	2.56293e-07	1.0858e-05	0.658444	0.00186174	3.31906e-07	0.0136693	1.04843e-06	9.15337e-05	0.936361	0.771087	0.534686	0.823493	0.571025	0.693418
Q99627	CSN8_HUMAN	COPS8	COP9 signalosome complex subunit 8	259671	308877	379801	325097	0.00320918	0.0128387	0.191668	0.0018729	0.0542855	0.0765541	0.867358	0.258556	0.840694	0.683703	0.798749	0.81326	0.950107	1.16827
Q8NBL1	PGLT1_HUMAN	POGLUT1	Protein O-glucosyltransferase 1	98549.5	151348	148734	173893	0.000140846	0.00126992	0.00143068	0.00187411	0.000113253	0.998339	0.386433	0.311175	0.651145	0.662587	0.566725	1.01757	0.870352	0.855321
O95865	DDAH2_HUMAN	DDAH2	N(G),N(G)-dimethylarginine dimethylaminohydrolase 2	239035	314268	360117	366566	0.000942821	0.00518117	0.0300976	0.00187579	0.00139689	0.408684	0.323913	0.997839	0.76061	0.663771	0.652094	0.872683	0.857331	0.982408
Q15003	CND2_HUMAN	NCAPH	Condensin complex subunit 2	469626	516856	546864	595985	5.11749e-05	0.000585702	0.0421111	0.00187952	3.12372e-05	0.318555	0.00312911	0.0711127	0.90862	0.858761	0.787983	0.945127	0.86723	0.917581
P29692	EF1D_HUMAN	EEF1D	Elongation factor 1-delta	6.72415e+06	8.41237e+06	8.91155e+06	8.16407e+06	0.00222654	0.00979057	0.0103234	0.00188044	0.0273016	0.752996	0.943268	0.438224	0.799317	0.754544	0.823627	0.943986	1.03041	1.09156
Q9Y296	TPPC4_HUMAN	TRAPPC4	Trafficking protein particle complex subunit 4	122902	162072	169594	163417	0.00132164	0.00663358	0.0058657	0.00188534	0.00483649	0.905956	0.999463	0.942313	0.758317	0.724682	0.752077	0.955646	0.991772	1.0378
Q9UDY4	DNJB4_HUMAN	DNAJB4	DnaJ homolog subfamily B member 4	721811	795685	843042	818376	0.00223003	0.00979408	0.044708	0.00188754	0.00929765	0.304935	0.805868	0.786351	0.907157	0.856198	0.882004	0.943826	0.972273	1.03014
O95373	IPO7_HUMAN	IPO7	Importin-7	1.82648e+06	2.18991e+06	2.33295e+06	2.27687e+06	0.00159744	0.00765035	0.0169291	0.00189336	0.00450745	0.593187	0.869739	0.953867	0.834041	0.782905	0.802188	0.938689	0.961809	1.02463
Q86V81	THOC4_HUMAN	ALYREF	THO complex subunit 4	2.52289e+06	3.45926e+06	4.55645e+06	4.1273e+06	0.00186961	0.00858074	0.116015	0.0019011	0.00664973	0.131226	0.386827	0.879585	0.729315	0.553697	0.61127	0.759201	0.838142	1.10398
O00488	ZN593_HUMAN	ZNF593	Zinc finger protein 593	603624	742257	794452	806167	0.000881889	0.00490662	0.0142391	0.00192643	0.00126854	0.656874	0.50991	0.993912	0.813228	0.759799	0.748758	0.934301	0.920724	0.985468
P02768	ALBU_HUMAN	ALB	Albumin	9.45068e+06	7.27626e+06	6.30947e+06	4.84416e+06	3.47081e-05	0.000433622	0.0362641	0.00194453	1.99689e-05	0.366923	0.00202371	0.0378156	1.29884	1.49786	1.95094	1.15323	1.50207	1.30249
Q86W42	THOC6_HUMAN	THOC6	THO complex subunit 6 homolog	357389	386802	433896	406873	0.0028137	0.0116151	0.242443	0.00194722	0.0302867	0.0609914	0.602821	0.418357	0.923958	0.823674	0.878379	0.891463	0.95067	1.06642
Q06587	RING1_HUMAN	RING1	E3 ubiquitin-protein ligase RING1	208941	280327	292328	267199	0.00184956	0.00850052	0.00574457	0.00198303	0.0215717	0.920863	0.871076	0.5296	0.745347	0.714749	0.781967	0.958948	1.04913	1.09404
Q8IXW5	RPAP2_HUMAN	RPAP2	Putative RNA polymerase II subunit B1 CTD phosphatase RPAP2	50257.9	59065.9	63063.9	64266.1	0.000862479	0.00482677	0.0214709	0.002049	0.00111552	0.542367	0.348389	0.981769	0.850879	0.796936	0.782028	0.936603	0.919083	0.981294
Q9H7L9	SDS3_HUMAN	SUDS3	Sin3 histone deacetylase corepressor complex component SDS3	110529	145601	178132	161874	0.00247604	0.0105371	0.0592727	0.00206846	0.0103862	0.261812	0.753144	0.781962	0.759121	0.620489	0.682811	0.817378	0.899476	1.10044
P21399	ACOHC_HUMAN	ACO1	Cytoplasmic aconitate hydratase	608581	570575	557122	640871	2.4238e-05	0.000337239	0.0194847	0.00206905	0.0662572	0.577663	0.000196197	3.19151e-05	1.06661	1.09236	0.949615	1.02415	0.890312	0.86932
O75044	SRGP2_HUMAN	SRGAP2	SLIT-ROBO Rho GTPase-activating protein 2	169525	186957	207694	221413	0.00019178	0.00158039	0.154427	0.00207499	0.00018878	0.107022	0.00760389	0.45176	0.906758	0.816222	0.76565	0.900155	0.844382	0.938041
P46939	UTRN_HUMAN	UTRN	Utrophin	206464	220729	234460	238555	0.000576685	0.00357668	0.105064	0.00208717	0.000720518	0.158057	0.053236	0.911768	0.935373	0.880592	0.865477	0.941434	0.925275	0.982836
P23025	XPA_HUMAN	XPA	DNA repair protein complementing XP-A cells	33450	86459	117080	105907	0.00170989	0.00801466	0.0342703	0.00209304	0.0040458	0.404499	0.621807	0.978712	0.386888	0.285701	0.315843	0.738458	0.816367	1.1055
Q68EM7	RHG17_HUMAN	ARHGAP17	Rho GTPase-activating protein 17	672700	724897	815537	969616	5.32085e-06	0.000109892	0.329638	0.00209881	4.9582e-06	0.045231	4.54695e-05	0.00471703	0.927994	0.824856	0.69378	0.888859	0.747613	0.841093
P28330	ACADL_HUMAN	ACADL	Long-chain specific acyl-CoA dehydrogenase, mitochondrial	29703.8	63984.9	59220	52696.4	0.000773264	0.00447504	0.000957647	0.00211553	0.0119179	0.961041	0.470009	0.746803	0.464232	0.501584	0.563678	1.08046	1.21422	1.12379
P09651	ROA1_HUMAN	HNRNPA1	Heterogeneous nuclear ribonucleoprotein A1	3.32183e+07	4.20545e+07	4.77447e+07	4.06113e+07	0.00354771	0.0138906	0.038015	0.0021193	0.0910523	0.3788	0.955036	0.183398	0.789888	0.695748	0.817957	0.880819	1.03554	1.17565
P31942	HNRH3_HUMAN	HNRNPH3	Heterogeneous nuclear ribonucleoprotein H3	4.73318e+06	5.95345e+06	6.51766e+06	5.85434e+06	0.00296024	0.0121141	0.0208419	0.00211943	0.0328447	0.563806	0.993524	0.420728	0.795032	0.726208	0.80849	0.913433	1.01693	1.1133
A2RU67	F234B_HUMAN	FAM234B	Protein FAM234B	92934.7	191951	216403	252966	0.000538122	0.00340185	0.00594735	0.0021405	0.000589642	0.929246	0.52253	0.854276	0.484157	0.429451	0.36738	0.887008	0.758803	0.855463
P17813	EGLN_HUMAN	ENG	Endoglin	319109	356646	409628	426161	0.000464756	0.00306394	0.190246	0.0021508	0.000637142	0.0887981	0.0243204	0.874531	0.894751	0.779022	0.7488	0.870657	0.836881	0.961206
P22626	ROA2_HUMAN	HNRNPA2B1	Heterogeneous nuclear ribonucleoproteins A2/B1	6.74206e+07	8.18066e+07	9.2802e+07	8.25436e+07	0.00370136	0.0142971	0.0662411	0.00215629	0.0479042	0.247101	0.997482	0.322187	0.824146	0.7265	0.816788	0.881518	0.991072	1.12428
P12004	PCNA_HUMAN	PCNA	Proliferating cell nuclear antigen	5.05639e+06	5.90539e+06	6.87026e+06	6.86145e+06	0.00116145	0.00602312	0.115917	0.0021601	0.00218377	0.148549	0.1501	1	0.856233	0.735982	0.736927	0.859557	0.860662	1.00129
O43491	E41L2_HUMAN	EPB41L2	Band 4.1-like protein 2	654428	718193	728489	713316	0.00179754	0.00831928	0.00638496	0.00217473	0.0105149	0.918914	0.991298	0.79398	0.911216	0.898337	0.917446	0.985866	1.00684	1.02127
Q96FS4	SIPA1_HUMAN	SIPA1	Signal-induced proliferation-associated protein 1	4.19466e+06	4.73834e+06	5.09163e+06	4.94548e+06	0.00234305	0.0101774	0.0467536	0.00219655	0.00797327	0.333295	0.745336	0.872104	0.88526	0.823834	0.848181	0.930613	0.958115	1.02955
Q6XQN6	PNCB_HUMAN	NAPRT	Nicotinate phosphoribosyltransferase	776573	874268	913617	1.0681e+06	7.35309e-06	0.00014086	0.0211563	0.00220889	3.79062e-06	0.57323	0.000363863	0.00300397	0.888255	0.849998	0.727058	0.956931	0.818524	0.855364
P04439	HLAA_HUMAN	HLA-A	HLA class I histocompatibility antigen, A alpha chain	5.59776e+06	5.90339e+06	6.78468e+06	5.48578e+06	0.000863984	0.00482677	0.580895	0.00222746	0.966925	0.0208546	0.339461	0.00105217	0.948229	0.825059	1.02041	0.870106	1.07613	1.23678
P52888	THOP1_HUMAN	THOP1	Thimet oligopeptidase	523674	584897	598264	691476	3.90933e-06	8.75821e-05	0.00871838	0.00223283	1.8748e-06	0.853878	0.000298211	0.00103714	0.895328	0.875323	0.757328	0.977657	0.845867	0.865198
P48200	IREB2_HUMAN	IREB2	Iron-responsive element-binding protein 2	99565.4	113066	118618	124721	0.000342258	0.00244011	0.0219383	0.00223769	0.000264316	0.565745	0.0829682	0.552675	0.880596	0.839376	0.798308	0.953191	0.906554	0.951073
Q4VC31	MIX23_HUMAN	MIX23	Protein MIX23	212412	272866	286000	272508	0.00190981	0.00874096	0.00771713	0.00224456	0.00986026	0.885275	0.998942	0.822076	0.778446	0.742699	0.779468	0.954079	1.00131	1.04951
Q99707	METH_HUMAN	MTR	Methionine synthase	170797	188668	198868	226694	1.25469e-05	0.000208873	0.0369938	0.0022518	6.92626e-06	0.404517	0.000496177	0.00717805	0.90528	0.858845	0.753427	0.948707	0.832258	0.877256
P12814	ACTN1_HUMAN	ACTN1	Alpha-actinin-1	3.35743e+06	4.05983e+06	4.41167e+06	3.91774e+06	0.00364528	0.0141632	0.0332311	0.00226002	0.0788188	0.437287	0.957148	0.221499	0.826987	0.761034	0.856981	0.920248	1.03627	1.12607
Q9UN86	G3BP2_HUMAN	G3BP2	Ras GTPase-activating protein-binding protein 2	1.88879e+06	1.97994e+06	2.36169e+06	1.98217e+06	0.00227622	0.0099692	0.793129	0.00226796	0.733458	0.0110188	0.999485	0.0133728	0.953966	0.799765	0.952892	0.838358	0.998875	1.19147
P04844	RPN2_HUMAN	RPN2	Dolichyl-diphosphooligosaccharide--protein glycosyltransferase subunit 2	3.63063e+06	4.11932e+06	4.36506e+06	3.80178e+06	0.00218254	0.00963554	0.0316816	0.0022862	0.648951	0.45545	0.224129	0.0174658	0.881366	0.831747	0.95498	0.943702	1.08352	1.14816
Q12894	IFRD2_HUMAN	IFRD2	Interferon-related developmental regulator 2	226447	193956	182743	166443	0.000153893	0.00134616	0.0217304	0.00228667	9.56666e-05	0.576405	0.0250751	0.22109	1.16752	1.23915	1.36051	1.06136	1.1653	1.09794
Q10589	BST2_HUMAN	BST2	Bone marrow stromal antigen 2	2.45178e+06	3.04572e+06	3.19014e+06	3.22965e+06	0.00102276	0.00552241	0.0096018	0.00229278	0.00159118	0.83556	0.719856	0.996005	0.804992	0.768549	0.759148	0.954729	0.943051	0.987767
P30043	BLVRB_HUMAN	BLVRB	Flavin reductase (NADPH)	1.27456e+06	1.45534e+06	1.80124e+06	1.69479e+06	0.00204126	0.00915244	0.27767	0.00230105	0.00918681	0.0616217	0.228388	0.8484	0.87578	0.707597	0.752045	0.807962	0.858714	1.06282
Q86VP6	CAND1_HUMAN	CAND1	Cullin-associated NEDD8-dissociated protein 1	1.45515e+06	1.72806e+06	1.6928e+06	1.9251e+06	1.31983e-05	0.000215748	0.000715764	0.00230206	6.53176e-06	0.888045	0.0225379	0.00643811	0.842071	0.85961	0.755884	1.02083	0.897649	0.879334
Q9UHD9	UBQL2_HUMAN	UBQLN2	Ubiquilin-2	203393	285954	313793	324203	0.000951135	0.00519938	0.0135551	0.00231715	0.00126719	0.736306	0.525406	0.982431	0.711278	0.648174	0.627363	0.911281	0.882022	0.967893
P19021	AMD_HUMAN	PAM	Peptidyl-glycine alpha-amidating monooxygenase	27899.8	50077.4	55279.8	58437.5	0.000888103	0.00493233	0.00716975	0.0023236	0.00131146	0.909379	0.74773	0.984987	0.557134	0.504702	0.477431	0.90589	0.85694	0.945966
O95359	TACC2_HUMAN	TACC2	Transforming acidic coiled-coil-containing protein 2	43601.8	75892	93431.1	71361.9	0.00311753	0.0125924	0.0183946	0.00234154	0.035362	0.640075	0.981404	0.429761	0.574524	0.466673	0.610996	0.812278	1.06348	1.30926
P55327	TPD52_HUMAN	TPD52	Tumor protein D52	478274	670389	715422	800312	0.000376528	0.00261477	0.00841948	0.00234674	0.000304281	0.8756	0.230479	0.590304	0.713428	0.66852	0.597609	0.937054	0.837659	0.893928
Q9NUQ9	CYRIB_HUMAN	CYRIB	CYFIP-related Rac1 interactor B	660326	710082	768934	849469	3.2398e-05	0.000415764	0.156691	0.00235716	2.45322e-05	0.119499	0.000641033	0.0408869	0.92993	0.858756	0.77734	0.923463	0.835913	0.905194
Q9P2T1	GMPR2_HUMAN	GMPR2	GMP reductase 2	104172	122377	131044	150466	6.34404e-05	0.000691878	0.0269812	0.00236185	3.54306e-05	0.51674	0.0056918	0.0662368	0.851237	0.794938	0.692328	0.933862	0.813321	0.870921
P30876	RPB2_HUMAN	POLR2B	DNA-directed RNA polymerase II subunit RPB2	881930	956303	1.02446e+06	1.15976e+06	1.34567e-05	0.000219052	0.104967	0.00239995	8.96729e-06	0.180287	0.000271296	0.0097829	0.922229	0.860874	0.760441	0.93347	0.824568	0.883336
P53420	CO4A4_HUMAN	COL4A4	Collagen alpha-4(IV) chain	37142.9	52741.4	57211.1	74802.9	6.31714e-05	0.000691225	0.0116809	0.00240137	3.27746e-05	0.793547	0.0117757	0.0588692	0.704245	0.649225	0.496544	0.921874	0.705072	0.764825
P08865	RSSA_HUMAN	RPSA	40S ribosomal protein SA	9.92169e+06	1.36406e+07	1.4039e+07	1.29531e+07	0.00176707	0.00821854	0.00430205	0.00240633	0.0154031	0.985345	0.880903	0.707971	0.727367	0.706726	0.765971	0.971622	1.05307	1.08383
P62879	GBB2_HUMAN	GNB2	Guanine nucleotide-binding protein G(I)/G(S)/G(T) subunit beta-2	3.24809e+06	3.71891e+06	4.10911e+06	3.86404e+06	0.00339042	0.0133759	0.0743127	0.00242377	0.0195944	0.247967	0.867068	0.631098	0.873399	0.790462	0.840595	0.905041	0.962441	1.06342
P55084	ECHB_HUMAN	HADHB	Trifunctional enzyme subunit beta, mitochondrial	2.67966e+06	2.29206e+06	2.32084e+06	2.03997e+06	1.28106e-05	0.000211664	0.00112328	0.00243531	6.03898e-06	0.96423	0.0122421	0.00541488	1.1691	1.15461	1.31358	0.987599	1.12358	1.13768
Q9BSV6	SEN34_HUMAN	TSEN34	tRNA-splicing endonuclease subunit Sen34	64654.7	91308.2	99979.7	105655	0.000822587	0.0046625	0.0121254	0.00243952	0.000963975	0.787343	0.466877	0.940283	0.708093	0.646678	0.611943	0.913267	0.864212	0.946286
P60981	DEST_HUMAN	DSTN	Destrin	3.70452e+06	4.78522e+06	5.31688e+06	5.34735e+06	0.00141176	0.00698898	0.025826	0.00246814	0.00230216	0.545925	0.522198	0.999972	0.774159	0.696747	0.692777	0.900004	0.894876	0.994302
Q5U5X0	LYRM7_HUMAN	LYRM7	Complex III assembly factor LYRM7	196575	235814	266749	232569	0.00439949	0.0162827	0.0650425	0.00247615	0.100424	0.282511	0.993653	0.193323	0.833604	0.736929	0.845234	0.884028	1.01395	1.14697
P61160	ARP2_HUMAN	ACTR2	Actin-related protein 2	2.5124e+06	2.81312e+06	3.10522e+06	3.26866e+06	0.000392298	0.00268673	0.121432	0.00249554	0.000397774	0.162786	0.023507	0.671367	0.8931	0.809089	0.768633	0.905934	0.860635	0.949997
Q92805	GOGA1_HUMAN	GOLGA1	Golgin subfamily A member 1	132297	157626	157809	146613	0.00149291	0.00727511	0.0026636	0.00251004	0.0796015	0.999983	0.253648	0.240914	0.83931	0.838336	0.902355	0.99884	1.07512	1.07636
Q02790	FKBP4_HUMAN	FKBP4	Peptidyl-prolyl cis-trans isomerase FKBP4	3.96599e+06	4.64528e+06	5.30924e+06	5.33725e+06	0.00129516	0.00654413	0.112618	0.00251957	0.00224663	0.176502	0.158556	0.999877	0.853768	0.746997	0.743077	0.874942	0.87035	0.994752
Q9UFW8	CGBP1_HUMAN	CGGBP1	CGG triplet repeat-binding protein 1	287397	321013	355696	360569	0.00104455	0.00558627	0.11654	0.00253705	0.00158188	0.171958	0.108948	0.991538	0.895282	0.807985	0.797065	0.902492	0.890295	0.986484
Q71UM5	RS27L_HUMAN	RPS27L	40S ribosomal protein S27-like	1.9015e+06	1.5984e+06	1.44852e+06	1.50183e+06	0.00249947	0.0105959	0.049234	0.00254099	0.00735128	0.359523	0.702255	0.922815	1.18962	1.31271	1.26612	1.10347	1.0643	0.964505
Q6UUV7	CRTC3_HUMAN	CRTC3	CREB-regulated transcription coactivator 3	321757	420859	434559	542843	3.56252e-05	0.000440758	0.0067737	0.00254526	1.71163e-05	0.937851	0.00844168	0.0230496	0.764525	0.740422	0.592727	0.968473	0.775287	0.800525
P55268	LAMB2_HUMAN	LAMB2	Laminin subunit beta-2	147030	173706	185566	235710	6.0687e-06	0.000122281	0.0254314	0.002546	3.19778e-06	0.561648	0.000247131	0.00202341	0.846432	0.792336	0.623777	0.936089	0.736949	0.787263
Q6ZN55	ZN574_HUMAN	ZNF574	Zinc finger protein 574	51254.6	61824.7	71356.4	64473.8	0.00390012	0.0148479	0.0772282	0.00255573	0.0287732	0.251196	0.938574	0.522615	0.829031	0.71829	0.794968	0.866422	0.958913	1.10675
O60885	BRD4_HUMAN	BRD4	Bromodomain-containing protein 4	330668	356477	396963	389538	0.00179245	0.00830737	0.267565	0.00256165	0.00578792	0.071865	0.158021	0.962212	0.9276	0.832994	0.848873	0.89801	0.915128	1.01906
Q96FN4	CPNE2_HUMAN	CPNE2	Copine-2	48444.6	81788.6	91313.2	97049.6	0.000934648	0.00516048	0.0119219	0.00256414	0.00116785	0.807579	0.538578	0.962773	0.592314	0.530532	0.499173	0.895693	0.842751	0.940892
Q9UBS4	DJB11_HUMAN	DNAJB11	DnaJ homolog subfamily B member 11	1.33622e+06	1.64146e+06	1.78453e+06	1.24965e+06	0.000271314	0.00205868	0.0242695	0.00256753	0.768624	0.580009	0.00449081	0.000533887	0.814045	0.748779	1.06928	0.919824	1.31353	1.42803
Q16795	NDUA9_HUMAN	NDUFA9	NADH dehydrogenase [ubiquinone] 1 alpha subcomplex subunit 9, mitochondrial	634682	663258	747597	813118	5.12234e-05	0.000585702	0.573031	0.00259336	6.87623e-05	0.0250473	0.000469585	0.136303	0.956916	0.848963	0.780554	0.887186	0.815697	0.919421
P14618	KPYM_HUMAN	PKM	Pyruvate kinase PKM	3.7926e+07	4.8081e+07	6.43936e+07	6.383e+07	0.00130567	0.00657709	0.273515	0.00260007	0.00320673	0.0710674	0.0876826	0.999269	0.788795	0.588972	0.594173	0.746673	0.753267	1.00883
Q16822	PCKGM_HUMAN	PCK2	Phosphoenolpyruvate carboxykinase [GTP], mitochondrial	814544	748957	728409	574845	3.78683e-08	2.42982e-06	0.019161	0.00261835	2.77154e-08	0.665362	6.18584e-07	2.04122e-06	1.08757	1.11825	1.41698	1.02821	1.30288	1.26714
Q15084	PDIA6_HUMAN	PDIA6	Protein disulfide-isomerase A6	5.52352e+06	6.98408e+06	7.1866e+06	5.93584e+06	0.00128209	0.00650511	0.00611096	0.00262192	0.598601	0.958208	0.0557114	0.0234559	0.790873	0.768586	0.930538	0.97182	1.1766	1.21071
Q9H7Z6	KAT8_HUMAN	KAT8	Histone acetyltransferase KAT8	62116.2	124674	144114	142070	0.00150198	0.00730434	0.0109145	0.00264867	0.00299541	0.841544	0.874076	0.999851	0.49823	0.431021	0.437222	0.865106	0.877552	1.01439
P14735	IDE_HUMAN	IDE	Insulin-degrading enzyme	455853	532771	540320	575435	0.00023014	0.00181071	0.00480326	0.00265652	0.000158006	0.984668	0.193438	0.320616	0.855626	0.843672	0.792189	0.986029	0.925859	0.938977
P16083	NQO2_HUMAN	NQO2	Ribosyldihydronicotinamide dehydrogenase [quinone]	196863	233624	248376	308201	1.26955e-05	0.000210815	0.021837	0.00267188	6.44645e-06	0.628971	0.000723573	0.00541774	0.842652	0.792602	0.638749	0.940605	0.758023	0.805889
O14545	TRAD1_HUMAN	TRAFD1	TRAF-type zinc finger domain-containing protein 1	75423.5	84549.8	96000.2	140182	3.41025e-07	1.3496e-05	0.168505	0.00267384	2.90644e-07	0.125259	2.83285e-06	5.57472e-05	0.89206	0.785659	0.538039	0.880725	0.603142	0.684825
Q9HBH0	RHOF_HUMAN	RHOF	Rho-related GTP-binding protein RhoF	514568	402634	389047	340518	0.000144689	0.00129749	0.00707338	0.00271443	8.35888e-05	0.941687	0.0647449	0.16316	1.27801	1.32264	1.51113	1.03492	1.18242	1.14251
P46459	NSF_HUMAN	NSF	Vesicle-fusing ATPase	1.2638e+06	1.18764e+06	1.16005e+06	1.10077e+06	6.92427e-05	0.00073455	0.0246253	0.00272289	3.7624e-05	0.595537	0.00673391	0.0619061	1.06413	1.08943	1.1481	1.02378	1.07891	1.05386
Q0IIM8	TBC8B_HUMAN	TBC1D8B	TBC1 domain family member 8B	1.15723e+06	1.02564e+06	695612	353474	5.57663e-07	1.92963e-05	0.731499	0.00272774	7.40231e-07	0.0163211	2.1884e-06	0.000215883	1.1283	1.66361	3.27386	1.47444	2.90159	1.96793
Q8TAP9	MPLKI_HUMAN	MPLKIP	M-phase-specific PLK1-interacting protein	127622	146154	167684	198256	5.09702e-05	0.00058483	0.156984	0.00273552	3.85077e-05	0.137699	0.00110768	0.0634823	0.873202	0.761088	0.643725	0.871605	0.7372	0.845796
Q9P0J0	NDUAD_HUMAN	NDUFA13	NADH dehydrogenase [ubiquinone] 1 alpha subcomplex subunit 13	516547	577352	663939	611170	0.00420717	0.0157003	0.241835	0.00277411	0.0434934	0.0876043	0.723808	0.420525	0.894683	0.778004	0.845178	0.869586	0.944667	1.08634
Q9UL46	PSME2_HUMAN	PSME2	Proteasome activator complex subunit 2	1.04248e+06	1.2288e+06	1.252e+06	1.25159e+06	0.00128852	0.00651558	0.00591012	0.00277544	0.00274669	0.969576	0.968363	1	0.848374	0.832653	0.83293	0.981469	0.981796	1.00033
Q92896	GSLG1_HUMAN	GLG1	Golgi apparatus protein 1	249903	317259	367789	546254	6.55717e-06	0.000128595	0.0613591	0.00277721	3.92104e-06	0.325417	0.000152835	0.00250983	0.787693	0.679474	0.457485	0.862613	0.580791	0.673292
P09960	LKHA4_HUMAN	LTA4H	Leukotriene A-4 hydrolase	1.00714e+06	1.14363e+06	1.2105e+06	1.46263e+06	6.79733e-06	0.000131741	0.0336859	0.00279261	3.69213e-06	0.501582	0.000235299	0.00228401	0.880653	0.832001	0.688583	0.944755	0.7819	0.827622
Q6P1X6	CH082_HUMAN	C8orf82	UPF0598 protein C8orf82	115475	127894	136730	130207	0.00406129	0.0152854	0.0616145	0.00280156	0.0261419	0.326632	0.958943	0.585543	0.902894	0.844543	0.886856	0.935374	0.982237	1.0501
Q9HCN8	SDF2L_HUMAN	SDF2L1	Stromal cell-derived factor 2-like protein 1	421755	587749	661070	522216	0.00405563	0.0152753	0.0298847	0.00281232	0.178962	0.542712	0.715087	0.123505	0.717577	0.637989	0.807626	0.889088	1.12549	1.26589
P00747	PLMN_HUMAN	PLG	Plasminogen	245787	197405	185097	161840	0.000158163	0.00137358	0.0161021	0.00282405	9.19772e-05	0.747204	0.032207	0.174924	1.24509	1.32789	1.51871	1.0665	1.21976	1.1437
P31946	1433B_HUMAN	YWHAB	14-3-3 protein beta/alpha	4.81278e+06	5.99411e+06	5.95987e+06	6.51778e+06	0.000167818	0.00143481	0.00205033	0.00283779	0.00012007	0.997251	0.305557	0.231508	0.802919	0.807532	0.738408	1.00574	0.919654	0.914401
Q969G3	SMCE1_HUMAN	SMARCE1	SWI/SNF-related matrix-associated actin-dependent regulator of chromatin subfamily E member 1	555442	649573	650880	644754	0.00128739	0.00651558	0.00315167	0.00283955	0.00469394	0.99991	0.995227	0.990504	0.855088	0.853371	0.861479	0.997992	1.00747	1.0095
Q9BZK7	TBL1R_HUMAN	TBL1XR1	F-box-like/WD repeat-containing protein TBL1XR1	725482	891533	903695	965527	0.000368186	0.00257496	0.00445188	0.00284041	0.000306044	0.993141	0.385815	0.526939	0.813746	0.802795	0.751384	0.986542	0.923364	0.93596
Q6PJT7	ZC3HE_HUMAN	ZC3H14	Zinc finger CCCH domain-containing protein 14	517771	555253	566243	546710	0.00363679	0.0141386	0.0165921	0.00285025	0.0676806	0.740797	0.849352	0.307316	0.932497	0.914398	0.947068	0.98059	1.01563	1.03573
P62873	GBB1_HUMAN	GNB1	Guanine nucleotide-binding protein G(I)/G(S)/G(T) subunit beta-1	1.76052e+06	2.37822e+06	2.71628e+06	2.56423e+06	0.00272319	0.0113349	0.0348439	0.00285304	0.00792063	0.497876	0.831062	0.931115	0.740267	0.648135	0.686567	0.875543	0.927459	1.0593
P47897	SYQ_HUMAN	QARS1	Glutamine--tRNA ligase	1.50072e+06	1.58436e+06	1.62215e+06	1.74418e+06	1.13476e-05	0.000195304	0.0329528	0.00289303	6.05284e-06	0.520454	0.000460465	0.00455661	0.94721	0.925142	0.860416	0.976703	0.90837	0.930037
O00625	PIR_HUMAN	PIR	Pirin	620203	756089	835894	842774	0.00153814	0.00741655	0.0397004	0.00290659	0.00227897	0.462852	0.387906	0.998847	0.820277	0.741963	0.735907	0.904527	0.897144	0.991837
Q12765	SCRN1_HUMAN	SCRN1	Secernin-1	893272	945896	1.03582e+06	1.15507e+06	1.97858e-05	0.000291884	0.319907	0.00292362	1.7835e-05	0.0660516	0.000209408	0.0211195	0.944367	0.862379	0.77335	0.913183	0.818909	0.896764
Q9UEE9	CFDP1_HUMAN	CFDP1	Craniofacial development protein 1	293380	367493	363600	406489	0.000120236	0.00112848	0.00201952	0.00292617	7.65195e-05	0.995941	0.194558	0.13746	0.798327	0.806876	0.721741	1.01071	0.904068	0.894489
O75529	TAF5L_HUMAN	TAF5L	TAF5-like RNA polymerase II p300/CBP-associated factor-associated factor 65 kDa subunit 5L	32665	39200.3	49916.7	43059.7	0.00440513	0.0162827	0.303689	0.00296993	0.0504302	0.0715914	0.68125	0.397722	0.833285	0.65439	0.758598	0.785314	0.910371	1.15924
Q92530	PSMF1_HUMAN	PSMF1	Proteasome inhibitor PI31 subunit	370470	417477	440068	471003	0.000236277	0.00184146	0.0333588	0.00297582	0.000154162	0.525964	0.0292698	0.285348	0.887402	0.841847	0.786555	0.948665	0.886358	0.934321
Q92688	AN32B_HUMAN	ANP32B	Acidic leucine-rich nuclear phosphoprotein 32 family member B	3.21903e+06	4.00402e+06	4.70295e+06	4.28596e+06	0.00413447	0.0154814	0.0806317	0.0030331	0.02166	0.28015	0.870869	0.675487	0.803948	0.68447	0.751063	0.851386	0.934218	1.09729
Q9P2B4	CT2NL_HUMAN	CTTNBP2NL	CTTNBP2 N-terminal-like protein	394065	454194	439488	436722	0.000389739	0.00267198	0.000319853	0.00304594	0.00477686	0.519966	0.379944	0.993161	0.867614	0.896646	0.902325	1.03346	1.04001	1.00633
Q9NPQ8	RIC8A_HUMAN	RIC8A	Synembryn-A	1.06684e+06	975293	935065	911207	0.000739109	0.00432664	0.0374127	0.00306029	0.000682016	0.498318	0.138299	0.795801	1.09387	1.14093	1.1708	1.04302	1.07033	1.02618
Q15390	MTFR1_HUMAN	MTFR1	Mitochondrial fission regulator 1	32430.3	78749.1	141460	69034.1	0.00548478	0.01922	0.0884839	0.00306385	0.10736	0.261142	0.999402	0.220214	0.411818	0.229254	0.469772	0.556686	1.14073	2.04914
Q93062	RBPMS_HUMAN	RBPMS	RNA-binding protein with multiple splicing	44916.7	78544.4	88285.3	66163.9	0.00336723	0.0133178	0.0114685	0.00306408	0.0724495	0.86771	0.719314	0.308526	0.571863	0.508767	0.67887	0.889666	1.18712	1.33434
Q16531	DDB1_HUMAN	DDB1	DNA damage-binding protein 1	3.6818e+06	4.44845e+06	4.6372e+06	5.03259e+06	0.000307611	0.00226368	0.0117723	0.00306879	0.000204645	0.861582	0.112541	0.361704	0.827658	0.79397	0.73159	0.959297	0.883928	0.921434
Q99729	ROAA_HUMAN	HNRNPAB	Heterogeneous nuclear ribonucleoprotein A/B	2.80196e+06	3.26344e+06	3.5377e+06	3.11991e+06	0.00477786	0.0173595	0.0498783	0.00307989	0.238234	0.411789	0.772838	0.0988289	0.85859	0.792029	0.898089	0.922476	1.046	1.13391
P42684	ABL2_HUMAN	ABL2	Tyrosine-protein kinase ABL2	328068	242502	234285	228088	0.00103965	0.00558335	0.00605259	0.00308595	0.00155396	0.978198	0.850121	0.975371	1.35285	1.4003	1.43834	1.03508	1.06319	1.02717
Q9H410	DSN1_HUMAN	DSN1	Kinetochore-associated protein DSN1 homolog	105148	124384	132903	138633	0.000884196	0.00491476	0.0290124	0.00309386	0.000874043	0.585177	0.220805	0.867045	0.84535	0.791163	0.758465	0.9359	0.89722	0.958671
Q99618	CDCA3_HUMAN	CDCA3	Cell division cycle-associated protein 3	60573.7	89483	90612.6	119918	5.70279e-05	0.000638514	0.00361036	0.00311065	2.85725e-05	0.999741	0.0322801	0.0376344	0.676929	0.66849	0.505128	0.987534	0.746204	0.755624
O43148	MCES_HUMAN	RNMT	mRNA cap guanine-N7 methyltransferase	481691	460349	424494	394931	5.73418e-05	0.000639076	0.392454	0.0031234	5.94242e-05	0.0540732	0.000668125	0.0956212	1.04636	1.13474	1.21968	1.08447	1.16564	1.07486
Q9H425	CA198_HUMAN	C1orf198	Uncharacterized protein C1orf198	319121	410001	387506	487482	4.36335e-06	9.54081e-05	0.000378722	0.00312366	2.14915e-06	0.574986	0.00826309	0.000921249	0.778342	0.823524	0.654631	1.05805	0.841059	0.794914
Q96II8	LRCH3_HUMAN	LRCH3	DISP complex protein LRCH3	266512	272569	341582	353951	0.000262797	0.00201617	0.975576	0.00314266	0.00119259	0.00633915	0.0023456	0.93475	0.977781	0.78023	0.752964	0.79796	0.770074	0.965053
P39656	OST48_HUMAN	DDOST	Dolichyl-diphosphooligosaccharide--protein glycosyltransferase 48 kDa subunit	1.43066e+06	1.7014e+06	1.84618e+06	1.45109e+06	0.00148381	0.00724785	0.0375627	0.00314452	0.9904	0.506013	0.062759	0.00521686	0.840873	0.77493	0.985917	0.921578	1.17249	1.27226
P62316	SMD2_HUMAN	SNRPD2	Small nuclear ribonucleoprotein Sm D2	3.29159e+06	3.74123e+06	3.94829e+06	3.60962e+06	0.00471553	0.0171576	0.0339041	0.0031489	0.145075	0.53975	0.824453	0.170032	0.879815	0.833675	0.911895	0.947557	1.03646	1.09383
Q9BVC6	TM109_HUMAN	TMEM109	Transmembrane protein 109	3.00659e+06	2.38945e+06	2.36371e+06	2.04473e+06	8.80688e-05	0.000887267	0.00472472	0.00315517	4.61919e-05	0.995034	0.0460817	0.0692728	1.25827	1.27198	1.47041	1.01089	1.16859	1.156
Q9NWV4	CZIB_HUMAN	CZIB	CXXC motif containing zinc binding protein	209259	346942	402805	404311	0.0018252	0.00842957	0.0212143	0.00316617	0.0030905	0.696937	0.688724	0.999999	0.603153	0.519504	0.517569	0.861313	0.858106	0.996276
O60506	HNRPQ_HUMAN	SYNCRIP	Heterogeneous nuclear ribonucleoprotein Q	2.2437e+06	2.51343e+06	3.08456e+06	2.74731e+06	0.00421825	0.015715	0.442074	0.00319077	0.0527644	0.0467493	0.52785	0.405877	0.892686	0.727398	0.81669	0.814842	0.914868	1.12276
Q8TB40	ABHD4_HUMAN	ABHD4	(Lyso)-N-acylphosphatidylethanolamine lipase	29252.2	40207.2	50178.8	62429	0.000262524	0.00201617	0.070833	0.00319961	0.000190937	0.32532	0.01761	0.328929	0.727537	0.58296	0.468568	0.801278	0.644047	0.803774
Q12905	ILF2_HUMAN	ILF2	Interleukin enhancer-binding factor 2	1.38939e+06	1.71131e+06	1.72608e+06	1.65236e+06	0.00201647	0.00909813	0.00420806	0.00320937	0.0148573	0.998471	0.884027	0.811359	0.811887	0.804939	0.840852	0.991442	1.03568	1.04462
P61964	WDR5_HUMAN	WDR5	WD repeat-containing protein 5	758658	869205	941349	919875	0.00287354	0.0118399	0.0632905	0.00321355	0.00718296	0.356424	0.609752	0.964297	0.872818	0.805927	0.82474	0.923361	0.944916	1.02334
P23528	COF1_HUMAN	CFL1	Cofilin-1	2.99464e+07	3.8565e+07	3.9568e+07	4.2627e+07	0.000555352	0.00349222	0.00670578	0.00323525	0.000494014	0.972889	0.423142	0.663317	0.776518	0.756833	0.702522	0.97465	0.904708	0.928238
Q9NYB0	TE2IP_HUMAN	TERF2IP	Telomeric repeat-binding factor 2-interacting protein 1	249938	302726	303113	292034	0.00189177	0.00867041	0.00349079	0.00326611	0.0158876	0.999977	0.817021	0.797209	0.825623	0.82457	0.855852	0.998725	1.03661	1.03794
P17028	ZNF24_HUMAN	ZNF24	Zinc finger protein 24	97936	92858.9	120917	118100	0.000155407	0.00135321	0.661945	0.00327542	0.00777518	0.000497814	0.0011072	0.956516	1.05467	0.809942	0.82926	0.767955	0.786271	1.02385
P05412	JUN_HUMAN	JUN	Transcription factor Jun	501594	371019	337872	109065	3.30827e-09	4.04269e-07	0.0219974	0.00328699	3.42519e-09	0.697781	3.7916e-08	9.48918e-08	1.35194	1.48457	4.59904	1.09811	3.40182	3.09789
Q96HR3	MED30_HUMAN	MED30	Mediator of RNA polymerase II transcription subunit 30	43454.8	82446	84265.6	71570.8	0.00220665	0.00971603	0.00441753	0.00329535	0.0215819	0.998075	0.798699	0.704845	0.52707	0.515688	0.607158	0.978406	1.15195	1.17737
Q9Y6I3	EPN1_HUMAN	EPN1	Epsin-1	229359	260148	278026	293515	0.000477604	0.00312833	0.045474	0.00329826	0.00037	0.461046	0.0595326	0.547634	0.881647	0.824954	0.781422	0.935697	0.88632	0.947231
Q53SF7	COBL1_HUMAN	COBLL1	Cordon-bleu protein-like 1	38257.1	50868.7	65804.7	54628	0.0051141	0.0182191	0.114953	0.00330148	0.0383084	0.221063	0.914613	0.515854	0.752076	0.581374	0.700321	0.773026	0.931185	1.2046
Q86XX4	FRAS1_HUMAN	FRAS1	Extracellular matrix organizing protein FRAS1	31068.5	39997.9	49560.4	50152.3	0.0014157	0.00700083	0.121477	0.00330348	0.00208565	0.210258	0.13719	0.992418	0.776753	0.626881	0.619483	0.807054	0.79753	0.988199
Q9Y4H2	IRS2_HUMAN	IRS2	Insulin receptor substrate 2	133955	96634.3	93643.4	86849.1	0.000677924	0.0040364	0.00730219	0.00339409	0.000647975	0.968954	0.489658	0.745782	1.38621	1.43048	1.54239	1.03194	1.11267	1.07823
Q9BY89	K1671_HUMAN	KIAA1671	Uncharacterized protein KIAA1671	232365	257907	275156	265530	0.00420614	0.0157003	0.0693656	0.00340923	0.0174831	0.347704	0.856314	0.781994	0.900963	0.844485	0.875097	0.937314	0.971291	1.03625
Q96BR5	COA7_HUMAN	COA7	Cytochrome c oxidase assembly factor 7	331617	368766	408473	393154	0.0039168	0.0148777	0.148887	0.00345289	0.0154578	0.180412	0.565103	0.821556	0.899261	0.811846	0.84348	0.902792	0.93797	1.03897
Q96AX1	VP33A_HUMAN	VPS33A	Vacuolar protein sorting-associated protein 33A	77921.7	89565.1	92227.3	94464.6	0.00106558	0.00567025	0.0131642	0.00346778	0.00117798	0.865241	0.509487	0.91331	0.870001	0.844887	0.824877	0.971134	0.948133	0.976316
Q9Y3F4	STRAP_HUMAN	STRAP	Serine-threonine kinase receptor-associated protein	3.04976e+06	3.48911e+06	4.00007e+06	4.01279e+06	0.0017136	0.00802637	0.19145	0.00347617	0.00317589	0.140884	0.129295	0.999942	0.874081	0.762427	0.76001	0.872262	0.869497	0.99683
O14579	COPE_HUMAN	COPE	Coatomer subunit epsilon	1.26232e+06	1.47292e+06	1.56125e+06	1.58016e+06	0.00157661	0.00756453	0.0290619	0.00350519	0.00205337	0.627627	0.447381	0.988252	0.857017	0.808535	0.798857	0.943429	0.932136	0.98803
P07093	GDN_HUMAN	SERPINE2	Glia-derived nexin	96322.8	76667.5	61520.7	30830.3	4.36346e-07	1.62927e-05	0.14899	0.00351559	3.57445e-07	0.183269	3.95388e-06	6.02457e-05	1.25637	1.5657	3.12429	1.24621	2.48675	1.99546
P53990	IST1_HUMAN	IST1	IST1 homolog	360448	390146	415782	482981	6.52929e-06	0.000128429	0.114553	0.00352149	4.34555e-06	0.234627	0.000102014	0.00230701	0.92388	0.866915	0.746299	0.938342	0.807787	0.860867
P82094	TMF1_HUMAN	TMF1	TATA element modulatory factor	187296	223848	221043	178536	6.84301e-05	0.000729443	0.00190499	0.00352249	0.60563	0.982353	0.000262128	0.000458087	0.836712	0.84733	1.04907	1.01269	1.2538	1.23808
P04083	ANXA1_HUMAN	ANXA1	Annexin A1	9.35803e+06	1.1238e+07	1.11134e+07	9.55321e+06	0.000479636	0.00313497	0.00223845	0.00352772	0.945721	0.992714	0.00565429	0.00902955	0.832716	0.842052	0.97957	1.01121	1.17636	1.16331
Q9Y4W2	LAS1L_HUMAN	LAS1L	Ribosomal biogenesis protein LAS1L	549121	596611	608441	586021	0.00411088	0.0154368	0.0153148	0.00353216	0.0620794	0.83062	0.851585	0.388608	0.9204	0.902504	0.937033	0.980557	1.01807	1.03826
Q70J99	UN13D_HUMAN	UNC13D	Protein unc-13 homolog D	284328	291205	318272	332800	0.00011556	0.00109732	0.774907	0.00353684	0.000210252	0.0185921	0.000920837	0.331643	0.976383	0.893349	0.854351	0.914958	0.875016	0.956346
Q8NEZ5	FBX22_HUMAN	FBXO22	F-box only protein 22	283168	325026	339148	388414	4.85814e-05	0.000562303	0.0212282	0.00354438	2.45263e-05	0.734386	0.00444212	0.0267811	0.871218	0.834941	0.729038	0.95836	0.836803	0.873161
P15121	ALDR_HUMAN	AKR1B1	Aldo-keto reductase family 1 member B1	2.92479e+06	3.19291e+06	3.53948e+06	4.08749e+06	2.55695e-05	0.000352795	0.203771	0.00354653	1.93504e-05	0.134442	0.000369535	0.0193505	0.916026	0.826332	0.715546	0.902083	0.781141	0.86593
Q8IY67	RAVR1_HUMAN	RAVER1	Ribonucleoprotein PTB-binding 1	859744	911398	995377	995573	0.00161405	0.00770755	0.320178	0.00354824	0.00365952	0.080125	0.0826176	0.999998	0.943324	0.863737	0.863566	0.915631	0.91545	0.999802
O00750	P3C2B_HUMAN	PIK3C2B	Phosphatidylinositol 4-phosphate 3-kinase C2 domain-containing subunit beta	33133	58670.3	56119.1	48701.6	0.00155313	0.00748151	0.00195843	0.00356359	0.0340214	0.983684	0.386679	0.580743	0.564732	0.590404	0.680326	1.04546	1.20469	1.15231
Q96I24	FUBP3_HUMAN	FUBP3	Far upstream element-binding protein 3	1.82749e+06	1.81724e+06	2.09642e+06	1.88764e+06	0.00178206	0.00827081	0.997332	0.00357648	0.704457	0.00258523	0.592833	0.0235177	1.00565	0.87172	0.96814	0.866827	0.962705	1.11061
Q14203	DCTN1_HUMAN	DCTN1	Dynactin subunit 1	704181	790855	817740	854740	0.000561768	0.00350919	0.0213555	0.00361134	0.00042348	0.738621	0.141659	0.567506	0.890405	0.861131	0.823855	0.967123	0.925258	0.956712
A3KMH1	VWA8_HUMAN	VWA8	von Willebrand factor A domain-containing protein 8	548163	510947	506260	469631	1.67167e-05	0.000255737	0.00888514	0.0036114	7.74691e-06	0.951785	0.00214688	0.00520508	1.07284	1.08277	1.16722	1.00926	1.08798	1.078
Q9NX76	CKLF6_HUMAN	CMTM6	CKLF-like MARVEL transmembrane domain-containing protein 6	32883.5	98050.9	166941	119848	0.00401621	0.0151588	0.214813	0.00361311	0.0175916	0.129322	0.473036	0.797962	0.335372	0.196977	0.274377	0.58734	0.818126	1.39293
O75179	ANR17_HUMAN	ANKRD17	Ankyrin repeat domain-containing protein 17	1.23974e+06	1.33293e+06	1.50794e+06	1.55689e+06	0.000674378	0.00402253	0.399562	0.00362427	0.00111068	0.0613497	0.017728	0.890044	0.930084	0.822138	0.79629	0.883939	0.856148	0.968559
P09104	ENOG_HUMAN	ENO2	Gamma-enolase	388768	491467	556382	530467	0.0035946	0.0140489	0.0488816	0.00362723	0.0104124	0.468793	0.812606	0.926318	0.791036	0.698743	0.732879	0.883325	0.926479	1.04885
Q16851	UGPA_HUMAN	UGP2	UTP--glucose-1-phosphate uridylyltransferase	673546	804158	792944	772930	0.00136313	0.00679404	0.0018119	0.00363214	0.0118374	0.974848	0.696463	0.900974	0.837579	0.849424	0.871419	1.01414	1.0404	1.02589
P19823	ITIH2_HUMAN	ITIH2	Inter-alpha-trypsin inhibitor heavy chain H2	413815	315961	268255	190215	3.08228e-05	0.000399428	0.0690643	0.00363262	1.80662e-05	0.366379	0.000966252	0.0171665	1.3097	1.54261	2.17551	1.17784	1.66107	1.41028
Q13641	TPBG_HUMAN	TPBG	Trophoblast glycoprotein	180682	161534	147244	100870	1.321e-07	6.46705e-06	0.125421	0.00368595	1.14377e-07	0.22487	1.14821e-06	1.15432e-05	1.11854	1.2271	1.79123	1.09705	1.60141	1.45973
P27658	CO8A1_HUMAN	COL8A1	Collagen alpha-1(VIII) chain	73884.9	102483	109516	86607.5	0.00356103	0.0139342	0.0148189	0.00372989	0.290223	0.854302	0.322163	0.0948532	0.720951	0.674648	0.8531	0.935776	1.1833	1.26451
Q9H0J9	PAR12_HUMAN	PARP12	Protein mono-ADP-ribosyltransferase PARP12	164885	156940	138057	122678	3.461e-05	0.000433622	0.584657	0.00373512	4.11168e-05	0.0352876	0.000255999	0.0503319	1.05062	1.19432	1.34405	1.13677	1.27928	1.12537
P11413	G6PD_HUMAN	G6PD	Glucose-6-phosphate 1-dehydrogenase	3.62357e+06	3.71835e+06	3.95134e+06	4.51309e+06	3.83273e-07	1.48132e-05	0.557418	0.00373805	4.48144e-07	0.0383327	1.74876e-06	7.9377e-05	0.97451	0.917048	0.802903	0.941035	0.823905	0.87553
O00560	SDCB1_HUMAN	SDCBP	Syntenin-1	120700	146840	164579	188652	0.000257587	0.0019857	0.0581553	0.00374297	0.000171571	0.425094	0.0189754	0.261265	0.821988	0.733389	0.639803	0.892214	0.778361	0.872393
Q6UXI9	NPNT_HUMAN	NPNT	Nephronectin	33192.8	46287.2	50533.1	59735.8	0.000317066	0.0023078	0.0221093	0.00375315	0.000199958	0.740222	0.0598809	0.301921	0.717106	0.656853	0.55566	0.915978	0.774865	0.845943
Q9BV57	MTND_HUMAN	ADI1	Acireductone dioxygenase	173921	187790	208178	260934	1.89158e-06	4.96089e-05	0.270561	0.00375423	1.62768e-06	0.103666	1.4875e-05	0.00051594	0.926145	0.835446	0.666532	0.902068	0.719684	0.797816
O14713	ITBP1_HUMAN	ITGB1BP1	Integrin beta-1-binding protein 1	36407.7	39714.3	56981.4	63662.6	0.00022792	0.00180183	0.812627	0.00377182	0.000508177	0.0174788	0.00211334	0.621178	0.91674	0.638939	0.571884	0.696969	0.623824	0.895053
O15031	PLXB2_HUMAN	PLXNB2	Plexin-B2	581609	617154	672281	718215	0.000149947	0.00132133	0.323511	0.00377926	0.000150015	0.0842031	0.00247441	0.226486	0.942406	0.865128	0.809799	0.917999	0.859288	0.936045
Q99985	SEM3C_HUMAN	SEMA3C	Semaphorin-3C	203798	258090	286379	408504	1.04145e-05	0.000182088	0.0347805	0.00378374	5.53283e-06	0.593913	0.000389997	0.00305372	0.789642	0.711638	0.49889	0.901217	0.631792	0.701044
Q6ICG6	K0930_HUMAN	KIAA0930	Uncharacterized protein KIAA0930	40586.4	55120.9	55707.5	63532.7	0.00030298	0.00223731	0.00473438	0.00381548	0.000209982	0.999235	0.261112	0.3118	0.736316	0.728562	0.638826	0.98947	0.867598	0.876831
O14980	XPO1_HUMAN	XPO1	Exportin-1	1.50877e+06	1.7434e+06	1.84998e+06	1.94304e+06	0.000777746	0.00448527	0.0429206	0.00381572	0.000660593	0.527123	0.117781	0.714071	0.865417	0.815558	0.776498	0.942387	0.897253	0.952107
Q8IYB8	SUV3_HUMAN	SUPV3L1	ATP-dependent RNA helicase SUPV3L1, mitochondrial	632089	575021	562470	514462	4.93836e-05	0.000568599	0.0168302	0.00381863	2.42971e-05	0.826801	0.00550497	0.0244858	1.09925	1.12377	1.22864	1.02231	1.11771	1.09332
P43304	GPDM_HUMAN	GPD2	Glycerol-3-phosphate dehydrogenase, mitochondrial	1.99296e+06	1.76056e+06	1.80475e+06	1.57759e+06	2.29437e-06	5.69079e-05	0.000585669	0.00382457	1.08579e-06	0.669371	0.00171595	0.000280953	1.13201	1.10429	1.26329	0.975509	1.11597	1.14399
Q01081	U2AF1_HUMAN	U2AF1	Splicing factor U2AF 35 kDa subunit	3.75428e+06	4.43421e+06	4.87546e+06	4.20905e+06	0.00589836	0.0201981	0.0623701	0.0038515	0.291372	0.412757	0.767185	0.0974178	0.846663	0.770036	0.891955	0.909495	1.05349	1.15833
Q9P258	RCC2_HUMAN	RCC2	Protein RCC2	2.71337e+06	2.78162e+06	3.06563e+06	3.46999e+06	4.24293e-06	9.34718e-05	0.80911	0.00385906	5.88503e-06	0.0181174	1.73838e-05	0.00327451	0.975464	0.885092	0.781951	0.907355	0.80162	0.883469
Q9UBW7	ZMYM2_HUMAN	ZMYM2	Zinc finger MYM-type protein 2	382559	400990	428365	454051	0.000110881	0.00106513	0.314441	0.00385928	0.000104871	0.0890294	0.00169254	0.151466	0.954037	0.893067	0.842546	0.936093	0.883138	0.94343
P12270	TPR_HUMAN	TPR	Nucleoprotein TPR	1.04036e+06	1.24236e+06	1.21215e+06	1.09495e+06	0.00064592	0.00389142	0.0011715	0.00386899	0.496683	0.887848	0.0136216	0.0478132	0.837406	0.858276	0.950149	1.02492	1.13463	1.10704
P53582	MAP11_HUMAN	METAP1	Methionine aminopeptidase 1	693111	709814	893038	747438	0.00348494	0.0137077	0.963378	0.00391952	0.562748	0.00886687	0.826995	0.0395957	0.976468	0.776127	0.927316	0.794831	0.949663	1.1948
P04156	PRIO_HUMAN	PRNP	Major prion protein	115185	129633	144790	121957	0.00515309	0.0183199	0.149158	0.00393753	0.675874	0.202719	0.650726	0.0283341	0.888546	0.795531	0.944469	0.895318	1.06294	1.18722
Q56NI9	ESCO2_HUMAN	ESCO2	N-acetyltransferase ESCO2	47637.3	66447.2	100091	108297	0.00111813	0.00587549	0.22157	0.00395507	0.00156472	0.136266	0.0539471	0.943646	0.71692	0.475938	0.439877	0.663865	0.613565	0.924232
Q6SPF0	SAMD1_HUMAN	SAMD1	Sterile alpha motif domain-containing protein 1	237609	245420	283847	254508	0.00459524	0.0168254	0.840482	0.0039593	0.37513	0.0166115	0.828885	0.0729653	0.968173	0.837102	0.933603	0.86462	0.964293	1.11528
P40227	TCPZ_HUMAN	CCT6A	T-complex protein 1 subunit zeta	4.82222e+06	5.12804e+06	5.76227e+06	5.33676e+06	0.00598957	0.0204363	0.441342	0.00396104	0.103494	0.0583745	0.757123	0.283305	0.940365	0.836862	0.903586	0.889933	0.960889	1.07973
Q9UKK3	PARP4_HUMAN	PARP4	Protein mono-ADP-ribosyltransferase PARP4	132210	152913	159774	179020	0.000120548	0.00112848	0.0233196	0.0039669	6.44779e-05	0.741417	0.0142253	0.0834357	0.864609	0.827481	0.738524	0.957058	0.854171	0.892496
Q15417	CNN3_HUMAN	CNN3	Calponin-3	2.00933e+06	2.36653e+06	2.6546e+06	2.14835e+06	0.00468314	0.0170905	0.0977287	0.00399886	0.705098	0.299645	0.472817	0.026333	0.849062	0.756925	0.93529	0.891483	1.10156	1.23564
Q99523	SORT_HUMAN	SORT1	Sortilin	41101	67016.2	101377	132573	0.00046052	0.00304662	0.171756	0.0040056	0.000433327	0.179458	0.0176983	0.54103	0.613299	0.405426	0.310025	0.661057	0.505503	0.764689
Q969L2	MAL2_HUMAN	MAL2	Protein MAL2	196309	159440	145142	103192	5.84025e-06	0.0001184	0.0449449	0.00404374	3.28797e-06	0.531397	0.000158397	0.00134319	1.23124	1.35253	1.90238	1.09852	1.54509	1.40653
O43264	ZW10_HUMAN	ZW10	Centromere/kinetochore protein zw10 homolog	210463	233014	233019	224021	0.002439	0.01044	0.00398768	0.00407269	0.0813768	0.999999	0.346744	0.352451	0.903219	0.903199	0.939476	0.999978	1.04014	1.04016
P49321	NASP_HUMAN	NASP	Nuclear autoantigenic sperm protein	2.14312e+06	2.65907e+06	2.67332e+06	3.00792e+06	0.000179368	0.00149677	0.00471455	0.00410666	0.000104759	0.999799	0.125339	0.142751	0.805969	0.801672	0.712495	0.994669	0.884023	0.888761
P42025	ACTY_HUMAN	ACTR1B	Beta-centractin	84296	185823	197578	211855	0.00160159	0.00765915	0.00861733	0.00413629	0.00254478	0.972892	0.889887	0.991302	0.453637	0.426646	0.397894	0.940501	0.87712	0.932609
Q16537	2A5E_HUMAN	PPP2R5E	Serine/threonine-protein phosphatase 2A 56 kDa regulatory subunit epsilon isoform	231193	248977	262231	292438	2.34217e-05	0.00032865	0.0978288	0.004151	1.44827e-05	0.308573	0.000526943	0.0109954	0.928571	0.881639	0.790571	0.949458	0.851385	0.896706
Q86TS9	RM52_HUMAN	MRPL52	39S ribosomal protein L52, mitochondrial	31818.7	53274.9	86457.7	73880.9	0.0036876	0.014261	0.301531	0.0041652	0.0136825	0.100921	0.291358	0.900093	0.597254	0.368026	0.430675	0.616197	0.721092	1.17023
Q8N2F6	ARM10_HUMAN	ARMC10	Armadillo repeat-containing protein 10	117746	178644	181399	156831	0.0029416	0.0120602	0.00543409	0.00417123	0.0638016	0.998611	0.51393	0.430029	0.659109	0.649098	0.750783	0.984812	1.13909	1.15666
Q9Y2W1	TR150_HUMAN	THRAP3	Thyroid hormone receptor-associated protein 3	3.54519e+06	3.30979e+06	3.10445e+06	2.84631e+06	6.84279e-05	0.000729443	0.155486	0.00420601	4.81356e-05	0.20658	0.00146684	0.0546327	1.07112	1.14197	1.24554	1.06614	1.16283	1.09069
Q7L2J0	MEPCE_HUMAN	MEPCE	7SK snRNA methylphosphate capping enzyme	617006	545504	529543	528337	0.0023298	0.0101321	0.0193431	0.00421684	0.00395439	0.816449	0.797428	0.99998	1.13108	1.16517	1.16783	1.03014	1.03249	1.00228
Q96RD7	PANX1_HUMAN	PANX1	Pannexin-1	34604.7	67300.3	84940.2	45081	0.00493928	0.0177895	0.0558174	0.00422304	0.560419	0.475533	0.429396	0.0430241	0.514184	0.407401	0.767613	0.792325	1.49288	1.88417
Q96S44	PRPK_HUMAN	TP53RK	EKC/KEOPS complex subunit TP53RK	509290	462778	428354	432237	0.00309429	0.0125384	0.115146	0.00424849	0.00630074	0.273947	0.373897	0.995499	1.1005	1.18895	1.17827	1.08036	1.07066	0.991017
Q14061	COX17_HUMAN	COX17	Cytochrome c oxidase copper chaperone	426689	495365	526434	466198	0.00557472	0.019381	0.0370637	0.00424881	0.290216	0.612329	0.596942	0.107665	0.861363	0.810528	0.915254	0.940983	1.06256	1.12921
O14657	TOR1B_HUMAN	TOR1B	Torsin-1B	208415	269146	280449	275329	0.00277324	0.0114962	0.0138688	0.00427725	0.00674723	0.903025	0.975046	0.993113	0.774357	0.743147	0.756969	0.959695	0.977544	1.0186
Q15185	TEBP_HUMAN	PTGES3	Prostaglandin E synthase 3	8.34029e+06	1.02552e+07	1.09394e+07	1.21965e+07	0.000403933	0.00274086	0.0253924	0.00432467	0.000259994	0.742548	0.0707283	0.342638	0.813277	0.762405	0.683825	0.937448	0.840826	0.896931
Q5EBL8	PDZ11_HUMAN	PDZD11	PDZ domain-containing protein 11	73656.3	108022	127607	104339	0.00627109	0.0211134	0.0411412	0.00433312	0.0634445	0.584079	0.994133	0.443461	0.681865	0.577213	0.70593	0.846521	1.03529	1.223
Q9NUM4	T106B_HUMAN	TMEM106B	Transmembrane protein 106B	540149	597238	655331	676559	0.00120083	0.00615695	0.158351	0.00438524	0.00142804	0.210626	0.0713151	0.906239	0.904411	0.824238	0.798377	0.911353	0.882759	0.968624
P08670	VIME_HUMAN	VIM	Vimentin	5.91776e+07	7.0627e+07	7.99511e+07	6.59675e+07	0.00651006	0.0218007	0.107307	0.00440169	0.471631	0.299538	0.738122	0.0589118	0.83789	0.740173	0.897073	0.883377	1.07063	1.21198
Q96CN7	ISOC1_HUMAN	ISOC1	Isochorismatase domain-containing protein 1	328766	407650	399766	433717	0.000283602	0.00211549	0.00210412	0.00442447	0.000231446	0.970181	0.52303	0.302807	0.806491	0.822396	0.758019	1.01972	0.939898	0.921719
Q06323	PSME1_HUMAN	PSME1	Proteasome activator complex subunit 1	1.27011e+06	1.65472e+06	1.64861e+06	1.62564e+06	0.00193174	0.00882908	0.00386097	0.00448576	0.00757559	0.999742	0.978574	0.989712	0.767566	0.770409	0.781298	1.0037	1.01789	1.01413
Q8NFD5	ARI1B_HUMAN	ARID1B	AT-rich interactive domain-containing protein 1B	284471	335955	367949	389428	0.00100885	0.00545619	0.0605532	0.0044928	0.000901611	0.46943	0.117057	0.769262	0.846754	0.773127	0.730485	0.913047	0.862688	0.944845
P10809	CH60_HUMAN	HSPD1	60 kDa heat shock protein, mitochondrial	4.86911e+07	5.99806e+07	8.57188e+07	5.30144e+07	0.00487656	0.0176101	0.427821	0.00453355	0.895385	0.0698352	0.81769	0.0152509	0.811782	0.568033	0.918451	0.699737	1.1314	1.6169
Q9BQ15	SOSB1_HUMAN	NABP2	SOSS complex subunit B1	34896.7	70672.8	134485	126212	0.00235865	0.0102218	0.410302	0.0045856	0.00632998	0.0748398	0.102459	0.997525	0.493778	0.259484	0.276492	0.525507	0.559952	1.06555
P20700	LMNB1_HUMAN	LMNB1	Lamin-B1	7.11273e+06	8.11052e+06	8.38697e+06	7.78376e+06	0.0056062	0.0194495	0.0229126	0.00458638	0.145913	0.792423	0.702748	0.236478	0.876976	0.848069	0.913792	0.967037	1.04198	1.0775
Q96ER9	MITOK_HUMAN	CCDC51	Mitochondrial potassium channel	558413	517658	498027	415490	7.89166e-07	2.53184e-05	0.0547639	0.00458902	5.23819e-07	0.508609	1.28851e-05	8.39467e-05	1.07873	1.12125	1.34399	1.03942	1.2459	1.19865
P07900	HS90A_HUMAN	HSP90AA1	Heat shock protein HSP 90-alpha	1.54238e+07	1.83563e+07	1.92049e+07	2.10065e+07	0.000447114	0.00298181	0.0219578	0.00460648	0.000288823	0.806154	0.0915084	0.357879	0.840242	0.803114	0.734237	0.955812	0.87384	0.914238
P39687	AN32A_HUMAN	ANP32A	Acidic leucine-rich nuclear phosphoprotein 32 family member A	3.51763e+06	4.81045e+06	4.51014e+06	4.85597e+06	0.000306005	0.00225461	0.000637567	0.00461568	0.000532414	0.636714	0.999423	0.569686	0.731248	0.779939	0.724394	1.06659	0.990627	0.928783
Q96S59	RANB9_HUMAN	RANBP9	Ran-binding protein 9	195212	215818	223500	227052	0.00172717	0.00806705	0.0330799	0.00462688	0.00193676	0.6793	0.391291	0.953468	0.904523	0.873432	0.859766	0.965628	0.950519	0.984354
O94766	B3GA3_HUMAN	B3GAT3	Galactosylgalactosylxylosylprotein 3-beta-glucuronosyltransferase 3	200321	239882	259770	222242	0.00614948	0.0208207	0.0440436	0.00463281	0.325103	0.58399	0.606665	0.102132	0.835085	0.77115	0.901368	0.923439	1.07937	1.16886
Q16658	FSCN1_HUMAN	FSCN1	Fascin	6.33411e+06	7.17223e+06	7.78616e+06	8.25128e+06	0.000774957	0.00448033	0.0881169	0.00464091	0.000660154	0.366092	0.0580565	0.647742	0.883144	0.813509	0.767652	0.921151	0.869226	0.943631
Q15393	SF3B3_HUMAN	SF3B3	Splicing factor 3B subunit 3	1.82908e+06	2.03512e+06	2.05253e+06	2.02761e+06	0.00278293	0.0115168	0.00775479	0.00466082	0.00993148	0.990565	0.998912	0.970741	0.898761	0.891134	0.902089	0.991514	1.0037	1.01229
Q9BZQ6	EDEM3_HUMAN	EDEM3	ER degradation-enhancing alpha-mannosidase-like protein 3	163310	182347	212451	218473	0.00135922	0.0067848	0.288777	0.00466354	0.00208359	0.118414	0.0530282	0.962671	0.8956	0.768696	0.747508	0.858303	0.834645	0.972437
Q15545	TAF7_HUMAN	TAF7	Transcription initiation factor TFIID subunit 7	123297	148011	173541	186130	0.00118267	0.00609217	0.132379	0.00466455	0.00127603	0.262018	0.0767567	0.864017	0.833023	0.710476	0.662423	0.852888	0.795204	0.932365
Q9Y6K1	DNM3A_HUMAN	DNMT3A	DNA (cytosine-5)-methyltransferase 3A	50016.2	52186.8	70174.1	72979	0.000469354	0.0030804	0.971807	0.00467268	0.00201104	0.00985869	0.00416161	0.957567	0.958406	0.712744	0.68535	0.743677	0.715093	0.961565
P04062	GLCM_HUMAN	GBA	Lysosomal acid glucosylceramidase	477157	581456	619839	603013	0.00382265	0.0146484	0.0284281	0.00470124	0.00950883	0.733858	0.921813	0.976082	0.820625	0.769809	0.791289	0.938076	0.964252	1.0279
O00505	IMA4_HUMAN	KPNA3	Importin subunit alpha-4	440625	582383	578098	526693	0.00254421	0.0107305	0.00365583	0.00470882	0.0578616	0.998766	0.419466	0.499129	0.756589	0.762198	0.836587	1.00741	1.10574	1.0976
Q9H5U6	ZCHC4_HUMAN	ZCCHC4	rRNA N6-adenosine-methyltransferase ZCCHC4	178697	152547	140283	139657	0.0026129	0.0109573	0.0654664	0.00471843	0.00384444	0.46024	0.397914	0.999345	1.17142	1.27383	1.27954	1.08742	1.09229	1.00448
P36952	SPB5_HUMAN	SERPINB5	Serpin B5	1.10406e+06	1.37834e+06	1.4492e+06	1.54317e+06	0.000982018	0.0053373	0.016733	0.00477588	0.000841992	0.886528	0.333482	0.72616	0.801011	0.761842	0.715452	0.951101	0.893186	0.939107
Q96EY8	MMAB_HUMAN	MMAB	Corrinoid adenosyltransferase MMAB	303261	290432	258704	219339	5.63292e-06	0.000114901	0.683136	0.00480223	6.7231e-06	0.0339618	2.70073e-05	0.00319392	1.04417	1.17223	1.38261	1.12264	1.32412	1.17947
Q7Z6J0	SH3R1_HUMAN	SH3RF1	E3 ubiquitin-protein ligase SH3RF1	250855	221609	204441	205169	0.00320206	0.0128179	0.0880609	0.00481076	0.00560545	0.376322	0.420752	0.999732	1.13197	1.22703	1.22267	1.08397	1.08013	0.996453
Q6PI78	TMM65_HUMAN	TMEM65	Transmembrane protein 65	297406	252970	240263	229858	0.00111808	0.00587549	0.0281404	0.00484112	0.000971861	0.746555	0.24971	0.770943	1.17566	1.23784	1.29387	1.05289	1.10055	1.04527
Q96EY5	MB12A_HUMAN	MVB12A	Multivesicular body subunit 12A	111805	135201	151629	162003	0.00106383	0.00566545	0.100918	0.0048422	0.00101221	0.339833	0.0797843	0.784267	0.826948	0.737354	0.69014	0.891656	0.834562	0.935968
P17480	UBF1_HUMAN	UBTF	Nucleolar transcription factor 1	790385	877832	938412	998210	0.000479095	0.00313497	0.0958026	0.00484294	0.000361049	0.354246	0.0270782	0.41565	0.900384	0.842258	0.791803	0.935444	0.879406	0.940095
Q9H0E3	SP130_HUMAN	SAP130	Histone deacetylase complex subunit SAP130	150553	171358	183232	173234	0.00686484	0.0226989	0.0672921	0.00487172	0.0405191	0.461603	0.990651	0.629125	0.878587	0.821653	0.869072	0.935198	0.98917	1.05771
Q9BRG1	VPS25_HUMAN	VPS25	Vacuolar protein-sorting-associated protein 25	307050	332296	415465	450665	0.000362225	0.00254675	0.756125	0.0048913	0.000721385	0.0275814	0.00368867	0.662546	0.924026	0.739051	0.681327	0.799816	0.737346	0.921894
P31749	AKT1_HUMAN	AKT1	RAC-alpha serine/threonine-protein kinase	33961.4	19200.1	10339.6	10890.2	0.003509	0.0137713	0.081632	0.00489178	0.0065168	0.403377	0.491679	0.998258	1.76881	3.28459	3.11852	1.85695	1.76306	0.949439
P13797	PLST_HUMAN	PLS3	Plastin-3	2.72029e+06	3.03654e+06	3.32447e+06	3.52092e+06	0.000683596	0.00406285	0.148761	0.00490898	0.000620347	0.246201	0.0311039	0.605554	0.895851	0.818263	0.772608	0.913392	0.862429	0.944205
Q6ZW31	SYDE1_HUMAN	SYDE1	Rho GTPase-activating protein SYDE1	36487	57422.2	85955.8	67030.5	0.00640724	0.0215061	0.330083	0.00495244	0.0425059	0.106907	0.588156	0.618632	0.635416	0.424486	0.544335	0.668044	0.856658	1.28234
Q9NYL4	FKB11_HUMAN	FKBP11	Peptidyl-prolyl cis-trans isomerase FKBP11	900656	1.10631e+06	1.10031e+06	1.23245e+06	0.000185559	0.00153679	0.00455429	0.00496734	0.000106847	0.99995	0.132447	0.122009	0.814112	0.818549	0.730783	1.00545	0.897644	0.892778
Q96EU6	RRP36_HUMAN	RRP36	Ribosomal RNA processing protein 36 homolog	174039	213805	218785	225948	0.00151889	0.00735947	0.0111415	0.00496796	0.00182596	0.965023	0.718836	0.932009	0.814009	0.795482	0.770263	0.977239	0.946258	0.968297
P62318	SMD3_HUMAN	SNRPD3	Small nuclear ribonucleoprotein Sm D3	2.27267e+06	3.12224e+06	3.97508e+06	3.67787e+06	0.00463119	0.0169289	0.155886	0.00503692	0.012407	0.241036	0.477834	0.952677	0.727899	0.57173	0.617932	0.785452	0.848926	1.08081
Q8NBP7	PCSK9_HUMAN	PCSK9	Proprotein convertase subtilisin/kexin type 9	212184	225030	244753	207602	0.00156142	0.0075105	0.328632	0.0050553	0.917279	0.109626	0.126034	0.00172297	0.942913	0.86693	1.02207	0.919417	1.08395	1.17895
P21796	VDAC1_HUMAN	VDAC1	Voltage-dependent anion-selective channel protein 1	5.9058e+06	6.84442e+06	1.02696e+07	6.66376e+06	0.0063886	0.0214653	0.627496	0.00505899	0.6906	0.0423019	0.999513	0.0350089	0.862864	0.575075	0.886256	0.666473	1.02711	1.54111
Q9P0S2	COX16_HUMAN	COX16	Cytochrome c oxidase assembly protein COX16 homolog, mitochondrial	173247	194563	237379	219393	0.00557107	0.019381	0.398761	0.00508179	0.0317973	0.0860598	0.415431	0.723426	0.890441	0.729834	0.789665	0.819632	0.886825	1.08198
Q5JTZ9	SYAM_HUMAN	AARS2	Alanine--tRNA ligase, mitochondrial	416339	382161	374552	331891	9.35219e-06	0.000168416	0.021475	0.00509826	4.67813e-06	0.84116	0.000476876	0.00179061	1.08943	1.11157	1.25445	1.02032	1.15147	1.12854
Q6IE81	JADE1_HUMAN	JADE1	Protein Jade-1	94303.1	100200	116711	113748	0.00285572	0.0117739	0.615011	0.00513033	0.0118211	0.0445266	0.100971	0.96175	0.941153	0.808002	0.829052	0.858524	0.88089	1.02605
P09012	SNRPA_HUMAN	SNRPA	U1 small nuclear ribonucleoprotein A	2.19384e+06	2.58572e+06	2.83804e+06	2.69378e+06	0.00626531	0.0211047	0.0801145	0.00515054	0.0240031	0.424383	0.896197	0.81335	0.848442	0.773012	0.814408	0.911095	0.959886	1.05355
O95229	ZWINT_HUMAN	ZWINT	ZW10 interactor	153325	176743	209730	246673	0.000185993	0.00153846	0.291611	0.00515375	0.000166135	0.128709	0.00316144	0.191482	0.867502	0.73106	0.621572	0.842719	0.716508	0.850233
Q96MX0	CKLF3_HUMAN	CMTM3	CKLF-like MARVEL transmembrane domain-containing protein 3	601152	572780	532603	504858	0.000229711	0.00181071	0.379158	0.00518697	0.000236851	0.0938385	0.00340782	0.271705	1.04953	1.12871	1.19074	1.07544	1.13454	1.05496
Q13637	RAB32_HUMAN	RAB32	Ras-related protein Rab-32	857515	982090	940612	899430	0.000264741	0.00202275	0.000204935	0.00519332	0.172171	0.235713	0.00742646	0.225386	0.873153	0.911657	0.953398	1.0441	1.0919	1.04579
Q9BUL5	PHF23_HUMAN	PHF23	PHD finger protein 23	146191	168079	181068	186754	0.00168801	0.00795156	0.0782122	0.00520294	0.00178929	0.434862	0.180151	0.919354	0.869776	0.80738	0.782801	0.928262	0.900003	0.969557
O43464	HTRA2_HUMAN	HTRA2	Serine protease HTRA2, mitochondrial	244148	306435	365515	274775	0.00725421	0.0237119	0.131085	0.00527799	0.595221	0.292649	0.684236	0.0485901	0.796738	0.667957	0.888539	0.838365	1.11522	1.33023
Q9Y3P9	RBGP1_HUMAN	RABGAP1	Rab GTPase-activating protein 1	316151	360801	359839	370964	0.000868068	0.0048414	0.0043577	0.00529261	0.000964436	0.999446	0.800607	0.74004	0.876247	0.87859	0.852243	1.00267	0.972605	0.970012
Q9Y2A7	NCKP1_HUMAN	NCKAP1	Nck-associated protein 1	336102	364040	395688	420767	0.000427553	0.00287749	0.232499	0.00530667	0.00039167	0.169924	0.0111239	0.415605	0.923256	0.849413	0.798786	0.920019	0.865184	0.940398
O76003	GLRX3_HUMAN	GLRX3	Glutaredoxin-3	1.08678e+06	1.39734e+06	1.52027e+06	1.51801e+06	0.00330819	0.0131235	0.0312616	0.0053297	0.00569631	0.744292	0.76538	0.999978	0.777754	0.714863	0.715929	0.919138	0.920509	1.00149
Q8IVM0	CCD50_HUMAN	CCDC50	Coiled-coil domain-containing protein 50	294679	380196	376564	411183	0.000553336	0.00348617	0.00452076	0.00533877	0.000460271	0.999653	0.522913	0.469043	0.775073	0.782548	0.716661	1.00964	0.924637	0.915805
Q14527	HLTF_HUMAN	HLTF	Helicase-like transcription factor	201160	241494	255766	362998	2.15383e-06	5.45388e-05	0.0324531	0.00538106	1.23538e-06	0.735524	5.75044e-05	0.000250939	0.832983	0.786501	0.554163	0.944198	0.665276	0.704593
Q6UXH1	CREL2_HUMAN	CRELD2	Protein disulfide isomerase CRELD2	582504	822261	747637	778293	0.000385737	0.0026528	0.000385204	0.00539722	0.00176684	0.405094	0.775772	0.909258	0.708417	0.779126	0.748438	1.09981	1.05649	0.960612
Q5TGY3	AHDC1_HUMAN	AHDC1	AT-hook DNA-binding motif-containing protein 1	30464.2	42855.2	63492.4	61569.2	0.00324712	0.0129669	0.180032	0.00540969	0.00595983	0.223712	0.243051	0.999932	0.710863	0.479808	0.494796	0.674966	0.696049	1.03124
Q9NTK5	OLA1_HUMAN	OLA1	Obg-like ATPase 1	1.76646e+06	1.88972e+06	2.03426e+06	2.09004e+06	0.00115804	0.00602161	0.239448	0.005435	0.00137817	0.168306	0.0430882	0.845169	0.934773	0.868356	0.845179	0.928948	0.904154	0.973309
O43149	ZZEF1_HUMAN	ZZEF1	Zinc finger ZZ-type and EF-hand domain-containing protein 1	56686	77651	77775.4	91927	0.000284206	0.00211761	0.00660418	0.00548535	0.000169931	0.999527	0.156807	0.185459	0.730011	0.728843	0.616642	0.9984	0.844703	0.846056
P02462	CO4A1_HUMAN	COL4A1	Collagen alpha-1(IV) chain	172653	204208	213044	215926	0.00269285	0.0112284	0.0263166	0.00549094	0.00382941	0.80568	0.690754	0.996507	0.845477	0.810409	0.799593	0.958523	0.94573	0.986654
P62136	PP1A_HUMAN	PPP1CA	Serine/threonine-protein phosphatase PP1-alpha catalytic subunit	3.40785e+06	3.60972e+06	3.81469e+06	3.68359e+06	0.00817763	0.0259961	0.180163	0.00551484	0.051254	0.227302	0.870325	0.592093	0.944077	0.893351	0.925144	0.946269	0.979946	1.03559
Q9Y2V2	CHSP1_HUMAN	CARHSP1	Calcium-regulated heat-stable protein 1	882043	767212	684618	683751	0.00310029	0.0125473	0.150852	0.00552549	0.00510174	0.268484	0.251139	0.999962	1.14967	1.28837	1.29001	1.12064	1.12206	1.00127
P05161	ISG15_HUMAN	ISG15	Ubiquitin-like protein ISG15	3.8426e+06	4.83866e+06	5.54231e+06	1.40158e+06	8.03739e-09	7.81163e-07	0.0822341	0.00553036	3.75211e-07	0.437884	3.58934e-08	1.11664e-08	0.794145	0.693321	2.74162	0.873041	3.4523	3.95433
O75083	WDR1_HUMAN	WDR1	WD repeat-containing protein 1	5.38681e+06	5.8807e+06	6.50205e+06	6.65424e+06	0.00164545	0.00780675	0.245357	0.00555719	0.0022421	0.167321	0.069509	0.948673	0.916015	0.828478	0.80953	0.904437	0.883752	0.977129
P51991	ROA3_HUMAN	HNRNPA3	Heterogeneous nuclear ribonucleoprotein A3	9.27802e+06	1.12888e+07	1.36426e+07	1.24535e+07	0.00687725	0.0227145	0.204339	0.005559	0.0299976	0.202317	0.666622	0.770441	0.82188	0.680075	0.745011	0.827463	0.906471	1.09548
P37108	SRP14_HUMAN	SRP14	Signal recognition particle 14 kDa protein	2.56303e+06	2.91863e+06	3.81596e+06	3.60994e+06	0.00336248	0.0133149	0.631503	0.00559403	0.0149152	0.0462645	0.11991	0.940845	0.878163	0.67166	0.709991	0.764847	0.808496	1.05707
Q6P1Q9	MET2B_HUMAN	METTL2B	tRNA N(3)-methylcytidine methyltransferase METTL2B	296227	253233	246733	238482	0.00141932	0.00700542	0.0161742	0.00560158	0.00138066	0.927093	0.498285	0.837485	1.16978	1.2006	1.24214	1.02634	1.06185	1.0346
P19387	RPB3_HUMAN	POLR2C	DNA-directed RNA polymerase II subunit RPB3	632607	696624	753535	737225	0.00537903	0.0189848	0.144351	0.00563122	0.01436	0.283613	0.552064	0.947866	0.908103	0.839518	0.858092	0.924474	0.944927	1.02212
Q9P206	K1522_HUMAN	KIAA1522	Uncharacterized protein KIAA1522	267058	306584	319073	329156	0.00170641	0.00800969	0.0301423	0.00566137	0.00168327	0.774631	0.375842	0.887566	0.871078	0.836982	0.811343	0.960857	0.931423	0.969367
Q96IY1	NSL1_HUMAN	NSL1	Kinetochore-associated protein NSL1 homolog	104981	120874	137906	143216	0.00171556	0.00802984	0.205529	0.00568616	0.0021837	0.205185	0.082803	0.940673	0.868517	0.76125	0.733024	0.876495	0.843995	0.962921
Q8NI35	INADL_HUMAN	PATJ	InaD-like protein	33767.3	44480.4	65998.7	58318.2	0.00480916	0.0174348	0.487308	0.0057333	0.0218011	0.0729725	0.247648	0.868001	0.759151	0.511636	0.579019	0.673958	0.762719	1.1317
A6NDU8	RIMC1_HUMAN	RIMOC1	RAB7A-interacting MON1-CCZ1 complex subunit 1	276833	319233	365583	424408	0.000239691	0.00186367	0.167731	0.0057502	0.000176773	0.251957	0.00642518	0.185338	0.867179	0.757236	0.65228	0.873217	0.752186	0.861396
P57105	SYJ2B_HUMAN	SYNJ2BP	Synaptojanin-2-binding protein	292638	353669	362871	330153	0.00544345	0.0191377	0.0143668	0.00576641	0.15044	0.951383	0.53734	0.278784	0.827434	0.806453	0.886371	0.974643	1.07123	1.0991
Q53HC5	KLH26_HUMAN	KLHL26	Kelch-like protein 26	31966.2	14809.2	13722.1	21211.4	0.00361482	0.0141029	0.007296	0.00579221	0.225718	0.999098	0.231849	0.189617	2.15854	2.32954	1.50703	1.07922	0.69817	0.646923
Q96NC0	ZMAT2_HUMAN	ZMAT2	Zinc finger matrin-type protein 2	387067	467797	485321	483615	0.00362056	0.0141039	0.019371	0.00580525	0.00755387	0.898316	0.947672	0.998666	0.827426	0.797549	0.800362	0.963892	0.967292	1.00353
Q9NYL9	TMOD3_HUMAN	TMOD3	Tropomodulin-3	1.51006e+06	1.79792e+06	1.8594e+06	1.43582e+06	0.000379957	0.00262755	0.0182007	0.00582357	0.71787	0.912027	0.00290733	0.00098947	0.839894	0.812124	1.0517	0.966936	1.25219	1.295
O15371	EIF3D_HUMAN	EIF3D	Eukaryotic translation initiation factor 3 subunit D	1.32138e+06	1.42647e+06	1.62815e+06	1.47928e+06	0.00925287	0.0285843	0.47078	0.00589715	0.166789	0.0789477	0.874979	0.258686	0.926327	0.811584	0.893255	0.876131	0.964298	1.10063
P26368	U2AF2_HUMAN	U2AF2	Splicing factor U2AF 65 kDa subunit	2.05001e+06	2.31861e+06	2.45729e+06	2.22298e+06	0.00856622	0.0269335	0.0602701	0.00590533	0.278674	0.560485	0.773454	0.153838	0.884152	0.834255	0.92219	0.943565	1.04302	1.10541
O15511	ARPC5_HUMAN	ARPC5	Actin-related protein 2/3 complex subunit 5	1.44697e+06	1.65201e+06	2.22845e+06	1.71538e+06	0.00892145	0.0278648	0.582896	0.00592011	0.362992	0.056539	0.975748	0.112675	0.875886	0.649317	0.843528	0.741326	0.963056	1.2991
P53618	COPB_HUMAN	COPB1	Coatomer subunit beta	1.27334e+06	1.37693e+06	1.46348e+06	1.41874e+06	0.00749689	0.0242915	0.150792	0.00594238	0.0305004	0.285127	0.781368	0.785907	0.924761	0.870074	0.897513	0.940863	0.970535	1.03154
Q04721	NOTC2_HUMAN	NOTCH2	Neurogenic locus notch homolog protein 2	533429	581395	637984	571236	0.0100533	0.0303805	0.230602	0.00595055	0.390355	0.189965	0.980096	0.103141	0.917497	0.836116	0.933815	0.911301	1.01778	1.11685
Q9Y5J5	PHLA3_HUMAN	PHLDA3	Pleckstrin homology-like domain family A member 3	26729.4	37040.3	48559.8	45451.5	0.00547647	0.0192011	0.132164	0.0059735	0.0134679	0.320838	0.562642	0.964757	0.721631	0.550444	0.588087	0.762778	0.814942	1.06839
Q9NQS1	AVEN_HUMAN	AVEN	Cell death regulator Aven	133630	160739	167949	159920	0.00598529	0.0204322	0.0238401	0.00599838	0.0286659	0.85713	0.999558	0.806939	0.831349	0.795657	0.835604	0.957067	1.00512	1.05021
P29279	CCN2_HUMAN	CCN2	CCN family member 2	350212	319417	278890	120154	4.86273e-10	8.92716e-08	0.382083	0.00601248	9.11424e-10	0.10711	2.44451e-09	1.23557e-08	1.09641	1.25574	2.91469	1.14532	2.65839	2.3211
Q16881	TRXR1_HUMAN	TXNRD1	Thioredoxin reductase 1, cytoplasmic	5.80568e+06	6.95358e+06	8.45466e+06	8.04645e+06	0.00523176	0.0185398	0.300257	0.00603785	0.0162773	0.144259	0.335048	0.939253	0.834919	0.686684	0.72152	0.822456	0.86418	1.05073
Q8TDZ2	MICA1_HUMAN	MICAL1	[F-actin]-monooxygenase MICAL1	229343	200173	198608	192805	0.00132597	0.00664392	0.00897618	0.00609123	0.00139093	0.995825	0.695212	0.816135	1.14572	1.15475	1.1895	1.00788	1.03821	1.0301
O00154	BACH_HUMAN	ACOT7	Cytosolic acyl coenzyme A thioester hydrolase	927470	1.07793e+06	1.17008e+06	1.29626e+06	0.000469072	0.0030804	0.0783073	0.00611973	0.000313702	0.485185	0.0284307	0.308537	0.860415	0.792658	0.715499	0.921251	0.831575	0.902658
Q9UM47	NOTC3_HUMAN	NOTCH3	Neurogenic locus notch homolog protein 3	44426.6	59610.9	72509.3	69839.5	0.00496843	0.0178362	0.0967578	0.00612857	0.0101879	0.418357	0.580353	0.99079	0.745276	0.612702	0.636124	0.822114	0.853542	1.03823
Q07820	MCL1_HUMAN	MCL1	Induced myeloid leukemia cell differentiation protein Mcl-1	55429.8	75570.2	76992.3	75723.9	0.00301257	0.0122859	0.00818103	0.00614781	0.00823358	0.998307	1	0.998192	0.733488	0.71994	0.731999	0.98153	0.99797	1.01675
Q9H936	GHC1_HUMAN	SLC25A22	Mitochondrial glutamate carrier 1	773047	731450	677661	575833	4.26748e-06	9.37003e-05	0.332685	0.00615797	3.69164e-06	0.130208	3.19632e-05	0.00106604	1.05687	1.14076	1.34249	1.07937	1.27025	1.17684
O95295	SNAPN_HUMAN	SNAPIN	SNARE-associated protein Snapin	175995	226461	272562	254846	0.00654691	0.021897	0.114298	0.00621004	0.0188713	0.37203	0.725638	0.917802	0.777153	0.645704	0.690592	0.830859	0.888618	1.06952
P47736	RPGP1_HUMAN	RAP1GAP	Rap1 GTPase-activating protein 1	34257.9	45528.6	50639.1	58813.5	0.000645849	0.00389142	0.0532201	0.00622936	0.000434488	0.620604	0.0609354	0.402616	0.752446	0.67651	0.582483	0.899081	0.774119	0.861011
O77932	DXO_HUMAN	DXO	Decapping and exoribonuclease protein	54630.7	99564.7	109800	127304	0.0016993	0.00798328	0.0155933	0.00623312	0.00176253	0.95097	0.595282	0.876135	0.548696	0.497548	0.429136	0.906784	0.782103	0.862502
Q15120	PDK3_HUMAN	PDK3	[Pyruvate dehydrogenase (acetyl-transferring)] kinase isozyme 3, mitochondrial	87229.6	112903	123871	120194	0.00517865	0.018391	0.0449423	0.0062376	0.0117223	0.677969	0.867005	0.98283	0.772608	0.704198	0.725741	0.911456	0.93934	1.03059
Q13905	RPGF1_HUMAN	RAPGEF1	Rap guanine nucleotide exchange factor 1	33490	16328.4	12110.1	25482.1	0.00367245	0.0142328	0.016295	0.00625006	0.663401	0.944723	0.119075	0.047038	2.05103	2.76545	1.31425	1.34832	0.640778	0.475241
Q13247	SRSF6_HUMAN	SRSF6	Serine/arginine-rich splicing factor 6	1.49701e+07	1.32632e+07	1.23097e+07	1.08287e+07	0.000126596	0.00117017	0.10214	0.00628759	7.72813e-05	0.409283	0.00403234	0.0660747	1.1287	1.21612	1.38245	1.07746	1.22482	1.13676
P82675	RT05_HUMAN	MRPS5	28S ribosomal protein S5, mitochondrial	641546	588448	589565	556087	0.000139659	0.00126094	0.00528568	0.00628841	7.29504e-05	0.99961	0.0730853	0.0615446	1.09023	1.08817	1.15368	0.998105	1.05819	1.0602
O00764	PDXK_HUMAN	PDXK	Pyridoxal kinase	924927	1.03083e+06	1.20357e+06	1.32966e+06	0.000447057	0.00298181	0.397102	0.00629569	0.000490372	0.106442	0.00726837	0.439705	0.897266	0.768487	0.695613	0.856476	0.775259	0.905173
Q9BQ70	TCF25_HUMAN	TCF25	Transcription factor 25	2.03133e+06	2.36815e+06	2.57064e+06	3.11929e+06	6.12174e-05	0.000672069	0.0756157	0.00629588	3.45677e-05	0.505814	0.00201077	0.0235696	0.857771	0.790205	0.651216	0.921231	0.759195	0.82411
O00220	TR10A_HUMAN	TNFRSF10A	Tumor necrosis factor receptor superfamily member 10A	133337	116479	99193.8	80057.5	7.35475e-05	0.000771548	0.271802	0.00629741	5.72697e-05	0.167708	0.000988898	0.0453982	1.14472	1.3442	1.66551	1.17426	1.45495	1.23903
Q9Y587	AP4S1_HUMAN	AP4S1	AP-4 complex subunit sigma-1	36616.9	29800.1	20357.1	22613	0.0051588	0.0183304	0.443183	0.00631749	0.0196998	0.0920328	0.256342	0.912759	1.22875	1.79873	1.61928	1.46387	1.31783	0.900239
Q12797	ASPH_HUMAN	ASPH	Aspartyl/asparaginyl beta-hydroxylase	3.1108e+06	3.62265e+06	3.61228e+06	3.73654e+06	0.00116999	0.00605046	0.00604354	0.00633384	0.00129193	0.999992	0.795561	0.781392	0.858708	0.861175	0.832535	1.00287	0.96952	0.966743
Q14376	GALE_HUMAN	GALE	UDP-glucose 4-epimerase	1.03877e+06	943517	893956	922140	0.00768315	0.0247073	0.0883165	0.0063754	0.0280416	0.459149	0.907683	0.830543	1.10095	1.16199	1.12647	1.05544	1.02318	0.969436
Q99497	PARK7_HUMAN	PARK7	Parkinson disease protein 7	5.44248e+06	6.09602e+06	6.84283e+06	7.30602e+06	0.000953115	0.0052059	0.221077	0.00639182	0.000947773	0.21123	0.0316477	0.671627	0.892792	0.795354	0.74493	0.890862	0.834382	0.936602
Q9BWU0	NADAP_HUMAN	SLC4A1AP	Kanadaptin	419917	488926	490050	479619	0.0036877	0.014261	0.00708555	0.0063927	0.0194204	0.99992	0.936891	0.917953	0.858856	0.856886	0.875522	0.997706	1.01941	1.02175
P49411	EFTU_HUMAN	TUFM	Elongation factor Tu, mitochondrial	5.81372e+06	6.36655e+06	7.41445e+06	5.90371e+06	0.00544634	0.0191377	0.410855	0.0063971	0.984545	0.103313	0.60506	0.0117554	0.913168	0.784108	0.984757	0.858668	1.0784	1.2559
Q9UI12	VATH_HUMAN	ATP6V1H	V-type proton ATPase subunit H	264919	320459	322928	345915	0.000788986	0.00453427	0.0081909	0.00640457	0.000623338	0.998917	0.440555	0.518275	0.826686	0.820366	0.76585	0.992354	0.92641	0.933547
Q9UQB8	BAIP2_HUMAN	BAIAP2	Brain-specific angiogenesis inhibitor 1-associated protein 2	233530	263081	263315	211181	1.23154e-05	0.000206581	0.00697267	0.00641191	0.0191653	0.999957	3.19861e-05	3.00144e-05	0.887672	0.886884	1.10583	0.999112	1.24576	1.24687
O43505	B4GA1_HUMAN	B4GAT1	Beta-1,4-glucuronyltransferase 1	129820	158996	193753	187696	0.00465714	0.017005	0.199002	0.00646983	0.00975057	0.236811	0.330388	0.995094	0.816496	0.670027	0.691649	0.820613	0.847095	1.03227
P61587	RND3_HUMAN	RND3	Rho-related GTP-binding protein RhoE	211654	176726	134795	71923.3	2.06375e-06	5.28656e-05	0.309496	0.00648098	1.81092e-06	0.148701	1.49433e-05	0.000368231	1.19764	1.57019	2.94278	1.31107	2.45715	1.87415
P55795	HNRH2_HUMAN	HNRNPH2	Heterogeneous nuclear ribonucleoprotein H2	1.01089e+06	1.55297e+06	2.2655e+06	2.02446e+06	0.00604998	0.020552	0.207997	0.00649683	0.0167081	0.227636	0.468718	0.946932	0.650944	0.446212	0.499339	0.685484	0.7671	1.11906
P78381	S35A2_HUMAN	SLC35A2	UDP-galactose translocator	232496	195162	168301	158002	0.00166997	0.00788911	0.172691	0.00650291	0.00181721	0.271732	0.0831925	0.87359	1.19129	1.38143	1.47148	1.1596	1.23519	1.06519
Q86VN1	VPS36_HUMAN	VPS36	Vacuolar protein-sorting-associated protein 36	111021	156854	153433	166540	0.00102992	0.00554452	0.00430583	0.00659729	0.0011991	0.994325	0.867732	0.743897	0.707801	0.723584	0.666635	1.0223	0.941839	0.921296
O75607	NPM3_HUMAN	NPM3	Nucleoplasmin-3	482816	690842	834816	673171	0.0104268	0.031193	0.0836453	0.00660659	0.104591	0.488049	0.999088	0.416572	0.69888	0.57835	0.717226	0.827538	1.02625	1.24013
Q9H5K3	SG196_HUMAN	POMK	Protein O-mannose kinase	40577.4	89622.3	110168	94532.2	0.00677478	0.0225289	0.055411	0.00663517	0.0201251	0.628255	0.935815	0.918369	0.452761	0.368322	0.429244	0.813502	0.948061	1.16541
Q92734	TFG_HUMAN	TFG	Protein TFG	1.47209e+06	1.64733e+06	1.94456e+06	2.30574e+06	0.000126299	0.00116907	0.400013	0.00664067	0.00011694	0.110922	0.0014191	0.102656	0.893625	0.75703	0.638448	0.847145	0.714447	0.843359
Q9Y5L4	TIM13_HUMAN	TIMM13	Mitochondrial import inner membrane translocase subunit Tim13	623783	711646	824590	793243	0.00643964	0.0215819	0.249887	0.00664184	0.0199972	0.192549	0.457122	0.919795	0.876536	0.756477	0.78637	0.86303	0.897134	1.03952
P35354	PGH2_HUMAN	PTGS2	Prostaglandin G/H synthase 2	391928	319395	146397	65935.5	1.12152e-05	0.000194172	0.821074	0.00664717	1.50865e-05	0.0302681	4.65158e-05	0.00722506	1.2271	2.67717	5.94412	2.18171	4.84406	2.2203
Q9UKY1	ZHX1_HUMAN	ZHX1	Zinc fingers and homeoboxes protein 1	63952.2	87553.8	99967.3	82071.6	0.00988546	0.0300106	0.0568794	0.00669154	0.132057	0.622227	0.956619	0.35056	0.730433	0.639731	0.779225	0.875824	1.0668	1.21805
P41134	ID1_HUMAN	ID1	DNA-binding protein inhibitor ID-1	55195.7	76554.4	97072.3	85541.5	0.00821642	0.0260818	0.102457	0.00671214	0.03027	0.427728	0.89045	0.823808	0.720999	0.568604	0.64525	0.788633	0.894939	1.1348
O60341	KDM1A_HUMAN	KDM1A	Lysine-specific histone demethylase 1A	371602	407397	438078	443272	0.00316801	0.0127124	0.145057	0.00675158	0.00437062	0.326474	0.228086	0.994008	0.912137	0.848254	0.838315	0.929964	0.919067	0.988283
P35813	PPM1A_HUMAN	PPM1A	Protein phosphatase 1A	204178	235788	239582	274554	6.36481e-05	0.000692814	0.0136205	0.00677384	3.00311e-05	0.97715	0.00899572	0.0181401	0.865938	0.852224	0.743669	0.984163	0.858802	0.872622
A6ZKI3	RTL8C_HUMAN	RTL8C	Retrotransposon Gag-like protein 8C	157706	199703	227410	309465	5.54998e-05	0.000629157	0.0774841	0.00680374	3.12139e-05	0.522968	0.00172694	0.0190171	0.789705	0.693488	0.50961	0.87816	0.645316	0.73485
O43847	NRDC_HUMAN	NRDC	Nardilysin	620106	709174	706056	776897	0.000108929	0.00105096	0.00493737	0.00683552	5.49917e-05	0.997473	0.0550515	0.0397037	0.874406	0.878267	0.798182	1.00442	0.912828	0.908815
Q9Y570	PPME1_HUMAN	PPME1	Protein phosphatase methylesterase 1	754901	809775	905636	1.02902e+06	7.90326e-05	0.000816773	0.446919	0.00684119	7.45936e-05	0.0982116	0.000733183	0.0581889	0.932235	0.833559	0.733613	0.894151	0.78694	0.880098
Q7Z5L9	I2BP2_HUMAN	IRF2BP2	Interferon regulatory factor 2-binding protein 2	628024	740257	713622	653745	0.000665947	0.00398663	0.000979481	0.00688642	0.574846	0.658494	0.00883374	0.0672557	0.848387	0.880051	0.960657	1.03732	1.13233	1.09159
P49848	TAF6_HUMAN	TAF6	Transcription initiation factor TFIID subunit 6	114712	136609	148928	144655	0.00609416	0.0206651	0.0714095	0.00690413	0.0136986	0.555343	0.779611	0.978387	0.839707	0.770249	0.793003	0.917283	0.94438	1.02954
Q96GS4	BORC6_HUMAN	BORCS6	BLOC-1-related complex subunit 6	65542.6	70469.5	77850.3	86837.4	0.00011943	0.00112456	0.374004	0.00698798	0.000105595	0.126895	0.0013765	0.0867442	0.930084	0.841905	0.754774	0.905192	0.811511	0.896507
O00767	SCD_HUMAN	SCD	Stearoyl-CoA desaturase	565329	738689	1.17043e+06	1.31517e+06	0.00129647	0.00654576	0.510403	0.00705296	0.00209029	0.0833182	0.0242041	0.888953	0.765314	0.483011	0.429852	0.631128	0.561668	0.889943
P23526	SAHH_HUMAN	AHCY	Adenosylhomocysteinase	2.90517e+06	3.21823e+06	3.29271e+06	3.64872e+06	7.93998e-05	0.000818648	0.0251533	0.00706506	3.88689e-05	0.88447	0.00687944	0.0244842	0.902724	0.882305	0.796217	0.977381	0.882016	0.902428
P62826	RAN_HUMAN	RAN	GTP-binding nuclear protein Ran	2.38477e+07	2.90965e+07	3.30186e+07	3.27208e+07	0.00481561	0.0174487	0.135162	0.0070782	0.00846371	0.358954	0.409268	0.999585	0.819607	0.72225	0.728823	0.881215	0.889234	1.0091
Q15527	SURF2_HUMAN	SURF2	Surfeit locus protein 2	239487	276723	308836	365324	0.000168614	0.0014379	0.149626	0.00712707	0.000111495	0.331696	0.00420801	0.0907294	0.865439	0.775449	0.655547	0.896019	0.757474	0.845377
Q9NXC5	MIO_HUMAN	MIOS	GATOR complex protein MIOS	163694	199595	200158	196268	0.00373351	0.0144044	0.00771291	0.00712995	0.0144451	0.999964	0.983279	0.9765	0.820131	0.817823	0.834035	0.997186	1.01695	1.01982
Q86XZ4	SPAS2_HUMAN	SPATS2	Spermatogenesis-associated serine-rich protein 2	511749	574029	573694	573472	0.00303288	0.0123426	0.00743822	0.00715474	0.00780283	0.999996	0.999992	0.999952	0.891504	0.892024	0.89237	1.00058	1.00097	1.00039
O95167	NDUA3_HUMAN	NDUFA3	NADH dehydrogenase [ubiquinone] 1 alpha subcomplex subunit 3	1.04629e+06	1.241e+06	1.27173e+06	1.18728e+06	0.00714791	0.0234794	0.0185837	0.00717372	0.0877332	0.946024	0.80649	0.49868	0.843099	0.822727	0.881245	0.975837	1.04525	1.07113
Q86VI3	IQGA3_HUMAN	IQGAP3	Ras GTPase-activating-like protein IQGAP3	146625	168925	186376	199374	0.00115006	0.00598482	0.124522	0.00718444	0.000965193	0.387448	0.0610231	0.638914	0.867987	0.786715	0.735427	0.906367	0.847278	0.934808
Q9BXS0	COPA1_HUMAN	COL25A1	Collagen alpha-1(XXV) chain	35419.5	41132.1	54583.8	51510.4	0.00490596	0.0176791	0.509331	0.00720628	0.0167866	0.0853483	0.186728	0.961023	0.861116	0.648902	0.687619	0.75356	0.798521	1.05967
P52895	AK1C2_HUMAN	AKR1C2	Aldo-keto reductase family 1 member C2	3.18228e+06	3.46443e+06	4.06393e+06	4.5207e+06	0.000340395	0.00243208	0.547706	0.00720679	0.000412139	0.0761687	0.00371537	0.345651	0.918556	0.783054	0.703935	0.852484	0.766349	0.898961
Q9P000	COMD9_HUMAN	COMMD9	COMM domain-containing protein 9	104554	132189	160941	157502	0.00511921	0.0182191	0.235885	0.00725365	0.0108468	0.220713	0.307593	0.995395	0.79094	0.649641	0.663826	0.821354	0.839287	1.02183
Q9H0E2	TOLIP_HUMAN	TOLLIP	Toll-interacting protein	51284.7	95457.6	103062	106527	0.00324493	0.012966	0.01744	0.00725623	0.00501334	0.956913	0.888411	0.996318	0.537251	0.497608	0.481425	0.926211	0.89609	0.967479
P60900	PSA6_HUMAN	PSMA6	Proteasome subunit alpha type-6	1.8628e+06	2.22247e+06	2.57529e+06	2.40666e+06	0.00862974	0.0270945	0.155435	0.00727362	0.0299964	0.326254	0.766094	0.84824	0.838167	0.723338	0.77402	0.863001	0.923468	1.07007
Q13111	CAF1A_HUMAN	CHAF1A	Chromatin assembly factor 1 subunit A	267751	278448	303742	298327	0.00495726	0.0178204	0.581012	0.00736456	0.0192798	0.0705549	0.173841	0.944438	0.961586	0.88151	0.897511	0.916725	0.933365	1.01815
Q9C0B1	FTO_HUMAN	FTO	Alpha-ketoglutarate-dependent dioxygenase FTO	495096	549211	601283	661750	0.000375206	0.00261108	0.178225	0.00740679	0.000276441	0.293564	0.0101289	0.233978	0.901468	0.8234	0.748162	0.913399	0.829938	0.908626
Q9BVC3	DCC1_HUMAN	DSCC1	Sister chromatid cohesion protein DCC1	169732	199251	218733	222393	0.0037516	0.0144573	0.0911149	0.00740985	0.00495088	0.496502	0.374571	0.995245	0.851847	0.775975	0.763207	0.910933	0.895944	0.983545
Q6MZW2	FSTL4_HUMAN	FSTL4	Follistatin-related protein 4	175054	212703	204594	175420	0.000321688	0.00233106	0.0014829	0.00747281	0.999997	0.775455	0.00153425	0.00774663	0.822999	0.855618	0.997917	1.03963	1.21254	1.16631
Q9NVH1	DJC11_HUMAN	DNAJC11	DnaJ homolog subfamily C member 11	2.10924e+07	1.89613e+07	1.89766e+07	1.69199e+07	2.39393e-05	0.000335201	0.00675393	0.00747751	1.09558e-05	0.999923	0.00455328	0.00411836	1.11239	1.11149	1.2466	0.999191	1.12065	1.12156
P37840	SYUA_HUMAN	SNCA	Alpha-synuclein	410542	531416	565104	631349	0.000946542	0.00519145	0.0273011	0.00752044	0.000646677	0.880088	0.174347	0.4796	0.772543	0.726489	0.650262	0.940386	0.841715	0.895075
P11142	HSP7C_HUMAN	HSPA8	Heat shock cognate 71 kDa protein	5.18997e+07	5.72056e+07	7.31588e+07	5.88273e+07	0.0102094	0.0307818	0.726333	0.00756231	0.469995	0.0470516	0.968782	0.100672	0.907249	0.709411	0.882238	0.781936	0.972432	1.24362
Q16719	KYNU_HUMAN	KYNU	Kynureninase	1.00549e+06	1.296e+06	1.35043e+06	1.14844e+06	0.00678627	0.0225492	0.0189805	0.00756523	0.268325	0.950932	0.415591	0.200247	0.775844	0.74457	0.875529	0.959691	1.12849	1.17588
Q14651	PLSI_HUMAN	PLS1	Plastin-1	86208.9	105961	116113	121152	0.00257189	0.0108127	0.0749222	0.00757796	0.00263049	0.570036	0.264231	0.923839	0.813595	0.742458	0.711579	0.912565	0.874611	0.958409
Q96FV9	THOC1_HUMAN	THOC1	THO complex subunit 1	858317	952761	952197	883620	0.00263834	0.011036	0.00736264	0.00758258	0.669982	0.999998	0.0543191	0.0559293	0.900873	0.901407	0.971365	1.00059	1.07825	1.07761
Q13496	MTM1_HUMAN	MTM1	Myotubularin	33827.5	22399.9	12413.3	14864.8	0.00850993	0.0267933	0.189473	0.00759554	0.0277884	0.283389	0.670025	0.878278	1.51016	2.72511	2.27568	1.80451	1.50691	0.835078
Q9H6T3	RPAP3_HUMAN	RPAP3	RNA polymerase II-associated protein 3	450606	479851	529800	529405	0.00353298	0.013849	0.430443	0.00760454	0.00760322	0.114379	0.114361	1	0.939054	0.850521	0.851155	0.905722	0.906397	1.00075
Q96LD4	TRI47_HUMAN	TRIM47	E3 ubiquitin-protein ligase TRIM47	321607	263906	281585	259165	0.000120549	0.00112848	0.00034744	0.00761265	0.000154252	0.284267	0.945929	0.123607	1.21864	1.14213	1.24093	0.937219	1.0183	1.08651
P61421	VA0D1_HUMAN	ATP6V0D1	V-type proton ATPase subunit d 1	1.89109e+06	1.63977e+06	1.57253e+06	1.44455e+06	0.000576523	0.00357668	0.0360518	0.00762141	0.000347537	0.810586	0.0697237	0.284075	1.15327	1.20258	1.30912	1.04276	1.13514	1.08859
Q5H9R7	PP6R3_HUMAN	PPP6R3	Serine/threonine-protein phosphatase 6 regulatory subunit 3	569729	652281	658274	723066	0.000224106	0.00178537	0.0114209	0.00764601	0.000116328	0.995445	0.0602943	0.0891039	0.873441	0.865489	0.787935	0.990896	0.902104	0.910393
P54920	SNAA_HUMAN	NAPA	Alpha-soluble NSF attachment protein	1.12736e+06	1.30944e+06	1.30976e+06	1.32369e+06	0.0024715	0.0105246	0.00714489	0.00764819	0.00456861	0.999977	0.993522	0.990216	0.860947	0.860738	0.851679	0.999757	0.989235	0.989476
O00267	SPT5H_HUMAN	SUPT5H	Transcription elongation factor SPT5	416837	436236	454023	431688	0.0127175	0.0362754	0.19875	0.00766175	0.395767	0.273045	0.95929	0.128683	0.95553	0.918097	0.965598	0.960825	1.01054	1.05174
Q9H3C7	GGNB2_HUMAN	GGNBP2	Gametogenetin-binding protein 2	56447.9	64446.6	82207.5	82064.5	0.00326208	0.0130045	0.486469	0.00766439	0.00730273	0.0970059	0.0926043	0.999992	0.875887	0.686651	0.687848	0.78395	0.785316	1.00174
P50395	GDIB_HUMAN	GDI2	Rab GDP dissociation inhibitor beta	4.44467e+06	5.09865e+06	5.18412e+06	6.05687e+06	3.12993e-05	0.000404018	0.0151156	0.00769063	1.46659e-05	0.979329	0.00310093	0.00600673	0.871735	0.857363	0.733823	0.983513	0.841796	0.855907
P55036	PSMD4_HUMAN	PSMD4	26S proteasome non-ATPase regulatory subunit 4	736122	824974	969332	946581	0.00543526	0.0191377	0.386466	0.00769248	0.0147827	0.13315	0.237446	0.981235	0.892297	0.759411	0.777664	0.851075	0.87153	1.02404
Q5ZPR3	CD276_HUMAN	CD276	CD276 antigen	702493	857153	940153	781192	0.0100011	0.0302781	0.0742137	0.00769628	0.461499	0.578467	0.622214	0.105065	0.819565	0.747211	0.899257	0.911717	1.09724	1.20349
Q8NFA0	UBP32_HUMAN	USP32	Ubiquitin carboxyl-terminal hydrolase 32	152957	128550	124228	150302	0.00266336	0.0111335	0.0236871	0.00773453	0.982664	0.916867	0.0447348	0.0146017	1.18986	1.23127	1.01766	1.0348	0.855279	0.826517
P55735	SEC13_HUMAN	SEC13	Protein SEC13 homolog	1.59318e+06	1.82506e+06	1.85364e+06	1.93792e+06	0.00130935	0.00659063	0.0155019	0.00775741	0.0010646	0.977859	0.425173	0.648589	0.872947	0.859488	0.822107	0.984582	0.941761	0.956508
Q9UQ53	MGT4B_HUMAN	MGAT4B	Alpha-1,3-mannosyl-glycoprotein 4-beta-N-acetylglucosaminyltransferase B	32351.2	62687.4	83011.1	80526.4	0.00614727	0.0208207	0.120081	0.00777409	0.0119762	0.4216	0.558049	0.994342	0.516072	0.389721	0.401746	0.755169	0.77847	1.03086
Q9NZZ3	CHMP5_HUMAN	CHMP5	Charged multivesicular body protein 5	1.25925e+06	1.4075e+06	1.50903e+06	1.75137e+06	8.56369e-05	0.000865404	0.114077	0.00779351	5.12564e-05	0.438695	0.0021762	0.0317919	0.894677	0.834481	0.719012	0.932718	0.803655	0.861627
Q6EMK4	VASN_HUMAN	VASN	Vasorin	406278	330659	476429	536288	2.54549e-07	1.08536e-05	0.00114623	0.00781481	7.08845e-05	4.54496e-06	2.12331e-07	0.0478463	1.22869	0.852757	0.757575	0.694037	0.616571	0.888383
Q99797	MIPEP_HUMAN	MIPEP	Mitochondrial intermediate peptidase	175206	193300	195979	194842	0.00495865	0.0178204	0.0199351	0.00787273	0.0113457	0.949638	0.987886	0.996547	0.906398	0.894004	0.899223	0.986327	0.992085	1.00584
O75843	AP1G2_HUMAN	AP1G2	AP-1 complex subunit gamma-like 2	40458.9	64146.8	63610.2	68198.8	0.00208236	0.00931147	0.00797342	0.00788948	0.0028998	1	0.932909	0.934759	0.630723	0.636044	0.593249	1.00844	0.940586	0.932717
P07195	LDHB_HUMAN	LDHB	L-lactate dehydrogenase B chain	1.433e+07	1.61791e+07	1.80008e+07	1.90045e+07	0.00150869	0.00732203	0.217356	0.00789141	0.00152932	0.256998	0.0538481	0.768713	0.88571	0.796074	0.754031	0.898798	0.85133	0.947188
O95864	FADS2_HUMAN	FADS2	Acyl-CoA 6-desaturase	149455	193513	284844	348558	0.000587986	0.003625	0.464295	0.00794115	0.00067562	0.107318	0.00828626	0.477621	0.772322	0.524689	0.42878	0.679366	0.555182	0.817207
Q9GZQ3	COMD5_HUMAN	COMMD5	COMM domain-containing protein 5	74420.9	104776	103158	106505	0.00189813	0.00869352	0.0045525	0.00798662	0.00353685	0.987416	0.998772	0.963316	0.710287	0.721429	0.698755	1.01569	0.983765	0.968571
Q2T9J0	TYSD1_HUMAN	TYSND1	Peroxisomal leader peptide-processing protease	50351.7	68314.1	77150.1	80323.8	0.00349283	0.0137242	0.0818975	0.00799042	0.00411263	0.557226	0.353349	0.979551	0.73706	0.652646	0.626858	0.885471	0.850484	0.960488
Q9NRP2	COXM2_HUMAN	CMC2	COX assembly mitochondrial protein 2 homolog	466011	504037	587898	611381	0.00153773	0.00741655	0.572157	0.00799333	0.00267351	0.0784344	0.0259243	0.916764	0.924557	0.792673	0.762227	0.857355	0.824424	0.96159
Q9BQE9	BCL7B_HUMAN	BCL7B	B-cell CLL/lymphoma 7 protein family member B	843189	1.05166e+06	1.04461e+06	983058	0.00445835	0.016406	0.00625333	0.00800557	0.0588612	0.998902	0.587725	0.670871	0.801771	0.807184	0.85772	1.00675	1.06978	1.06261
A6NIH7	U119B_HUMAN	UNC119B	Protein unc-119 homolog B	41115	81336.2	100394	103435	0.00426505	0.0158625	0.0679158	0.00801604	0.005725	0.622564	0.510372	0.997236	0.505495	0.409539	0.397495	0.810174	0.786348	0.970592
Q9Y697	NFS1_HUMAN	NFS1	Cysteine desulfurase, mitochondrial	348904	362927	429548	363677	0.00819023	0.0260112	0.856919	0.0080211	0.819464	0.0320142	0.999808	0.0367872	0.961361	0.812259	0.959379	0.844906	0.997939	1.18112
O94782	UBP1_HUMAN	USP1	Ubiquitin carboxyl-terminal hydrolase 1	32808	39765.5	52312.8	62447.5	0.000459123	0.00304042	0.41293	0.00805765	0.000469933	0.127635	0.00656458	0.355195	0.825036	0.62715	0.525369	0.760149	0.636783	0.837708
O43556	SGCE_HUMAN	SGCE	Epsilon-sarcoglycan	34471.4	33558.4	54276.2	45152.8	0.00316138	0.0126999	0.994946	0.00809041	0.152029	0.00535569	0.103246	0.360568	1.02721	0.635112	0.76344	0.618289	0.743218	1.20206
Q9H1B7	I2BPL_HUMAN	IRF2BPL	Probable E3 ubiquitin-protein ligase IRF2BPL	229097	286887	287488	246189	0.00332094	0.0131583	0.00831332	0.0081054	0.57421	0.999999	0.0809965	0.0790293	0.79856	0.796892	0.930572	0.997911	1.16531	1.16775
P47712	PA24A_HUMAN	PLA2G4A	Cytosolic phospholipase A2	1.65233e+06	1.55386e+06	1.53432e+06	1.67004e+06	0.00103021	0.00554452	0.0276736	0.00812091	0.930691	0.894693	0.00971368	0.00291629	1.06337	1.07692	0.989396	1.01274	0.930433	0.918731
Q9NRM2	ZN277_HUMAN	ZNF277	Zinc finger protein 277	33239	45424.4	66896.3	53978.3	0.0118879	0.0345654	0.408722	0.00812445	0.101704	0.130355	0.785178	0.489273	0.731744	0.496873	0.615785	0.679026	0.84153	1.23932
P55884	EIF3B_HUMAN	EIF3B	Eukaryotic translation initiation factor 3 subunit B	1.9178e+06	2.03894e+06	2.12457e+06	2.26353e+06	0.000229407	0.00181071	0.12569	0.00819409	0.00014442	0.422749	0.0069124	0.107061	0.940588	0.902678	0.847261	0.959695	0.900778	0.938608
P15586	GNS_HUMAN	GNS	N-acetylglucosamine-6-sulfatase	1.60586e+06	1.69928e+06	1.80457e+06	1.63031e+06	0.00759198	0.0245117	0.260318	0.00824228	0.958129	0.222652	0.494692	0.0196591	0.945023	0.889883	0.985001	0.941652	1.0423	1.10689
P29373	RABP2_HUMAN	CRABP2	Cellular retinoic acid-binding protein 2	1.5584e+06	1.74763e+06	1.82845e+06	1.99277e+06	0.000387666	0.00266329	0.0551489	0.00830965	0.000222581	0.705005	0.0272999	0.16977	0.89172	0.852302	0.782026	0.955795	0.876986	0.917546
Q9H5V9	STEEP_HUMAN	STEEP1	STING ER exit protein	207944	229780	248247	278229	0.000219341	0.00176999	0.167846	0.0083159	0.000147252	0.338878	0.00517333	0.10793	0.90497	0.837652	0.747387	0.925613	0.825869	0.892241
P02788	TRFL_HUMAN	LTF	Lactotransferrin	3.72816e+06	3.42552e+06	3.08789e+06	2.89334e+06	0.000829417	0.00469316	0.328482	0.00834992	0.000830451	0.174679	0.0168093	0.534191	1.08835	1.20735	1.28853	1.10934	1.18393	1.06724
Q9Y696	CLIC4_HUMAN	CLIC4	Chloride intracellular channel protein 4	870791	975187	1.03591e+06	1.01833e+06	0.00750456	0.0242974	0.0891336	0.00836155	0.01661	0.543262	0.768163	0.97846	0.892948	0.840604	0.855119	0.941381	0.957636	1.01727
P50995	ANX11_HUMAN	ANXA11	Annexin A11	1.66627e+06	1.9443e+06	1.99194e+06	2.11862e+06	0.00126581	0.00644015	0.022075	0.00839383	0.000934842	0.943938	0.293832	0.575043	0.857006	0.83651	0.786491	0.976084	0.917719	0.940205
P42226	STAT6_HUMAN	STAT6	Signal transducer and activator of transcription 6	127020	132341	144535	179021	8.73451e-07	2.73585e-05	0.609902	0.00843776	1.01207e-06	0.0740877	3.89567e-06	0.000129176	0.959795	0.878818	0.709526	0.915631	0.739247	0.807363
Q6W2J9	BCOR_HUMAN	BCOR	BCL-6 corepressor	55545.9	75897.6	105179	121537	0.00206576	0.00924973	0.196406	0.00845837	0.00216417	0.299025	0.0862857	0.85328	0.731853	0.528107	0.45703	0.721603	0.624483	0.86541
Q86YP4	P66A_HUMAN	GATAD2A	Transcriptional repressor p66-alpha	581874	648853	730796	650286	0.0146677	0.0404417	0.307308	0.00846584	0.257459	0.190704	0.999249	0.230403	0.896774	0.796219	0.894797	0.887871	0.997796	1.12381
P30566	PUR8_HUMAN	ADSL	Adenylosuccinate lyase	809782	855261	869219	963260	4.03955e-06	8.95886e-05	0.0400362	0.00849373	2.29619e-06	0.811694	0.000109284	0.000405728	0.946825	0.93162	0.840668	0.983941	0.887881	0.902372
P02786	TFR1_HUMAN	TFRC	Transferrin receptor protein 1	1.11846e+07	1.18618e+07	1.24137e+07	1.18593e+07	0.0144927	0.0401267	0.175338	0.00850078	0.165861	0.331979	0.999983	0.348111	0.942903	0.900987	0.943104	0.955546	1.00021	1.04675
Q9HB40	RISC_HUMAN	SCPEP1	Retinoid-inducible serine carboxypeptidase	182874	207687	223134	211455	0.0115079	0.033638	0.0964141	0.00858869	0.0528716	0.525225	0.98401	0.729566	0.88053	0.819573	0.86484	0.930773	0.982181	1.05523
Q96FQ6	S10AG_HUMAN	S100A16	Protein S100-A16	452083	534497	605836	586593	0.00841913	0.0266103	0.164399	0.00859403	0.0213798	0.353621	0.636246	0.952348	0.84581	0.746214	0.770693	0.882248	0.911189	1.0328
Q9Y333	LSM2_HUMAN	LSM2	U6 snRNA-associated Sm-like protein LSm2	255653	378730	470791	419008	0.00926446	0.0285982	0.0899968	0.00864051	0.0265871	0.550788	0.891957	0.916133	0.675025	0.543028	0.610137	0.804456	0.903873	1.12358
Q5T440	CAF17_HUMAN	IBA57	Putative transferase CAF17, mitochondrial	132329	114651	113110	83822.3	5.97243e-07	2.01744e-05	0.0153263	0.00869031	3.59745e-07	0.987553	1.97477e-05	3.00337e-05	1.15419	1.16992	1.57869	1.01363	1.36779	1.3494
P09758	TACD2_HUMAN	TACSTD2	Tumor-associated calcium signal transducer 2	317679	401348	371001	298312	2.2651e-05	0.000321245	0.000363057	0.00869608	0.403939	0.265638	3.61056e-05	0.000588533	0.79153	0.856275	1.06492	1.0818	1.3454	1.24367
P30419	NMT1_HUMAN	NMT1	Glycylpeptide N-tetradecanoyltransferase 1	817414	943843	992008	1.04742e+06	0.00167585	0.00790556	0.0542412	0.00870756	0.00130528	0.725676	0.186464	0.682872	0.866048	0.823999	0.780406	0.951448	0.901111	0.947095
Q9H497	TOR3A_HUMAN	TOR3A	Torsin-3A	101013	135954	131883	129229	0.00279999	0.011573	0.0037499	0.0087455	0.012921	0.959345	0.888874	0.995829	0.742998	0.765933	0.781664	1.03087	1.05204	1.02054
P05186	PPBT_HUMAN	ALPL	Alkaline phosphatase, tissue-nonspecific isozyme	1.16697e+06	1.35523e+06	1.4778e+06	1.50858e+06	0.00412195	0.0154696	0.114412	0.00875323	0.00517258	0.473562	0.323053	0.989706	0.861088	0.789672	0.773557	0.917063	0.898348	0.979593
Q9NZ63	TLS1_HUMAN	C9orf78	Telomere length and silencing protein 1 homolog	348599	437447	427638	492116	0.000195834	0.00161179	0.00383389	0.0087665	0.000111589	0.961971	0.163261	0.0742998	0.796894	0.815174	0.708368	1.02294	0.88891	0.868977
Q15032	R3HD1_HUMAN	R3HDM1	R3H domain-containing protein 1	32356.8	53966.3	61746	56787.7	0.00781858	0.0250962	0.0366661	0.00879613	0.0229278	0.845705	0.992867	0.945396	0.599574	0.52403	0.569785	0.874004	0.950316	1.08731
P82970	HMGN5_HUMAN	HMGN5	High mobility group nucleosome-binding domain-containing protein 5	1.00786e+06	1.2641e+06	1.28544e+06	1.36094e+06	0.00203973	0.00915177	0.0147197	0.00879785	0.0020303	0.990624	0.664248	0.824617	0.797294	0.784057	0.740561	0.983397	0.928843	0.944524
Q9H9H4	VP37B_HUMAN	VPS37B	Vacuolar protein sorting-associated protein 37B	28376	49404.2	45837	83534	1.14349e-05	0.000196138	0.0027711	0.00880172	5.34186e-06	0.904626	0.00396456	0.00128737	0.574365	0.619064	0.339694	1.07782	0.591427	0.548723
Q32NB8	PGPS1_HUMAN	PGS1	CDP-diacylglycerol--glycerol-3-phosphate 3-phosphatidyltransferase, mitochondrial	106982	117585	128040	113698	0.0134999	0.0379501	0.22692	0.00882521	0.549456	0.270389	0.899571	0.0922004	0.909827	0.835533	0.940929	0.918343	1.03418	1.12614
P04818	TYSY_HUMAN	TYMS	Thymidylate synthase	1.05753e+06	1.07261e+06	1.2046e+06	1.45541e+06	1.57043e-06	4.28883e-05	0.976568	0.00883057	2.6875e-06	0.0179156	4.23372e-06	0.000489027	0.98594	0.877907	0.726619	0.890426	0.736981	0.827672
P06396	GELS_HUMAN	GSN	Gelsolin	3.31689e+06	3.00104e+06	2.9565e+06	2.8409e+06	0.00120621	0.00617974	0.0212892	0.00884458	0.00086301	0.956987	0.282033	0.529059	1.10524	1.12189	1.16755	1.01506	1.05637	1.04069
Q9Y4G6	TLN2_HUMAN	TLN2	Talin-2	33568.5	37340.3	47265.5	52972.7	0.00066942	0.00400018	0.669024	0.00884593	0.00100072	0.0652951	0.00682935	0.582124	0.898989	0.710211	0.633695	0.790011	0.704897	0.892263
Q9NXG2	THUM1_HUMAN	THUMPD1	THUMP domain-containing protein 1	474903	533872	533389	563957	0.000598189	0.00367546	0.00825369	0.00884607	0.000392078	0.999976	0.297465	0.281329	0.889546	0.890351	0.842091	1.00091	0.946653	0.945796
Q96TA1	NIBA2_HUMAN	NIBAN2	Protein Niban 2	1.15214e+06	1.26363e+06	1.3057e+06	1.30159e+06	0.00585636	0.0201063	0.0513382	0.00891516	0.00974894	0.750895	0.778558	0.999948	0.911766	0.882387	0.885172	0.967778	0.970832	1.00316
P04899	GNAI2_HUMAN	GNAI2	Guanine nucleotide-binding protein G(i) subunit alpha-2	1.929e+06	2.24503e+06	2.51047e+06	2.43142e+06	0.00834744	0.0264469	0.177682	0.00894801	0.020075	0.341387	0.586221	0.965916	0.859229	0.768383	0.793364	0.89427	0.923344	1.03251
P35520	CBS_HUMAN	CBS	Cystathionine beta-synthase	1.09695e+06	1.21129e+06	1.21958e+06	1.26009e+06	0.00139029	0.0069086	0.0146171	0.00899902	0.00111461	0.992118	0.457848	0.6153	0.905602	0.899446	0.870534	0.993202	0.961276	0.967855
Q92541	RTF1_HUMAN	RTF1	RNA polymerase-associated protein RTF1 homolog	694058	752493	788372	815003	0.00195551	0.00891306	0.108653	0.00901842	0.00169009	0.500381	0.124759	0.760058	0.922346	0.88037	0.851602	0.95449	0.923301	0.967324
Q14116	IL18_HUMAN	IL18	Interleukin-18	730294	784920	909278	857983	0.00921403	0.0285401	0.568116	0.00905968	0.0516354	0.0895746	0.399518	0.754119	0.930405	0.803158	0.851175	0.863235	0.914843	1.05979
Q9UGY1	NOL12_HUMAN	NOL12	Nucleolar protein 12	230998	285953	280421	268135	0.00404057	0.0152421	0.00481484	0.00911738	0.0484937	0.981937	0.564812	0.775668	0.807819	0.823755	0.8615	1.01973	1.06645	1.04582
P11441	UBL4A_HUMAN	UBL4A	Ubiquitin-like protein 4A	428633	513817	590973	547445	0.0120568	0.0348935	0.156894	0.00912548	0.0491903	0.384226	0.896597	0.771543	0.834214	0.725301	0.78297	0.869442	0.938571	1.07951
Q00587	BORG5_HUMAN	CDC42EP1	Cdc42 effector protein 1	362018	412717	518348	472157	0.0104413	0.0312105	0.46739	0.00917288	0.0549979	0.121787	0.514714	0.737884	0.877157	0.698408	0.766732	0.796217	0.87411	1.09783
O75362	ZN217_HUMAN	ZNF217	Zinc finger protein 217	118412	153037	161848	99448.6	0.000177602	0.0014839	0.0278391	0.00922167	0.228217	0.919925	0.000872136	0.000326073	0.773747	0.731622	1.19068	0.945557	1.53885	1.62746
Q96K17	BT3L4_HUMAN	BTF3L4	Transcription factor BTF3 homolog 4	822007	1.04757e+06	1.13265e+06	1.06357e+06	0.00950884	0.0291267	0.0434467	0.00925308	0.0349639	0.812772	0.999263	0.870773	0.784677	0.725735	0.772875	0.924884	0.98496	1.06496
Q96AG4	LRC59_HUMAN	LRRC59	Leucine-rich repeat-containing protein 59	4.09213e+06	5.03117e+06	6.92388e+06	5.41489e+06	0.0143424	0.039777	0.500314	0.00927733	0.192823	0.111618	0.891323	0.326905	0.813355	0.591017	0.755718	0.72664	0.929136	1.27867
Q96RP9	EFGM_HUMAN	GFM1	Elongation factor G, mitochondrial	1.93519e+06	1.83138e+06	1.82024e+06	1.66882e+06	6.17915e-06	0.000123752	0.0180565	0.00928113	3.14249e-06	0.980345	0.000323938	0.000582513	1.05668	1.06315	1.15962	1.00612	1.09741	1.09074
Q9NYV6	RRN3_HUMAN	RRN3	RNA polymerase I-specific transcription initiation factor RRN3	108267	119585	128210	106513	0.00309653	0.0125398	0.153694	0.00928949	0.981902	0.395704	0.0839418	0.00490222	0.905362	0.844453	1.01647	0.932724	1.12272	1.2037
Q9H2Y7	ZN106_HUMAN	ZNF106	Zinc finger protein 106	167079	195915	224621	217253	0.00808336	0.0257833	0.199254	0.00930173	0.0182803	0.318162	0.512776	0.979482	0.852813	0.743827	0.769053	0.872203	0.901783	1.03391
P14543	NID1_HUMAN	NID1	Nidogen-1	185366	264010	245296	213475	0.00163204	0.00776627	0.00156735	0.00934802	0.223911	0.723344	0.0533885	0.286946	0.702118	0.755683	0.868328	1.07629	1.23673	1.14906
P16455	MGMT_HUMAN	MGMT	Methylated-DNA--protein-cysteine methyltransferase	392542	442921	454610	485473	0.000802292	0.00458284	0.0294663	0.00935295	0.000491443	0.911517	0.123018	0.329351	0.886257	0.86347	0.808576	0.974288	0.912349	0.936426
Q641Q2	WAC2A_HUMAN	WASHC2A	WASH complex subunit 2A	198231	228957	227851	248346	0.000337841	0.00241906	0.0074301	0.00937905	0.000192175	0.999088	0.160751	0.129804	0.865801	0.870005	0.798206	1.00486	0.921928	0.917473
Q7L592	NDUF7_HUMAN	NDUFAF7	Protein arginine methyltransferase NDUFAF7, mitochondrial	314815	383593	372098	325124	0.00111049	0.00586249	0.00270255	0.00938288	0.866711	0.884656	0.0101099	0.036044	0.820701	0.846056	0.968293	1.03089	1.17984	1.14448
P02751	FINC_HUMAN	FN1	Fibronectin	208703	194653	169816	154806	0.000395498	0.00270026	0.572388	0.0094115	0.000459122	0.0917724	0.00389129	0.308767	1.07218	1.22899	1.34816	1.14626	1.2574	1.09696
Q9BWS9	CHID1_HUMAN	CHID1	Chitinase domain-containing protein 1	73434.9	138737	125342	140991	0.00142588	0.00702209	0.00311264	0.00947088	0.00242502	0.914257	0.998764	0.854716	0.529311	0.585879	0.520849	1.10687	0.984012	0.889004
Q969R5	LMBL2_HUMAN	L3MBTL2	Lethal(3)malignant brain tumor-like protein 2	100979	112580	116991	129873	0.000186853	0.00154364	0.0526704	0.00954071	9.83566e-05	0.763997	0.0106611	0.0587655	0.896952	0.863129	0.777519	0.962292	0.866846	0.900814
P15927	RFA2_HUMAN	RPA2	Replication protein A 32 kDa subunit	894444	909675	1.1841e+06	989536	0.00761082	0.0245368	0.995464	0.009569	0.524569	0.0143056	0.657925	0.107059	0.983257	0.75538	0.903903	0.768243	0.919294	1.19662
Q9H4A5	GLP3L_HUMAN	GOLPH3L	Golgi phosphoprotein 3-like	41337.6	51702.6	84712.1	57316.3	0.013306	0.0375327	0.716274	0.00961872	0.313135	0.0615742	0.874619	0.208799	0.799527	0.487978	0.721219	0.610333	0.902058	1.47797
Q9NZL9	MAT2B_HUMAN	MAT2B	Methionine adenosyltransferase 2 subunit beta	624644	745803	758288	871675	0.000222025	0.00178295	0.016761	0.00966038	0.000111152	0.988607	0.0390737	0.0672666	0.837545	0.823756	0.716602	0.983536	0.855598	0.86992
Q96EA4	SPDLY_HUMAN	SPDL1	Protein Spindly	2.19105e+06	2.40352e+06	2.51591e+06	2.34633e+06	0.0146023	0.0403119	0.0933602	0.00966621	0.274756	0.575314	0.898137	0.241049	0.911599	0.870879	0.93382	0.95533	1.02437	1.07227
Q99732	LITAF_HUMAN	LITAF	Lipopolysaccharide-induced tumor necrosis factor-alpha factor	467186	708471	862093	1.09889e+06	0.00137859	0.00686592	0.0904013	0.00967727	0.00101273	0.586901	0.0892068	0.556556	0.659428	0.54192	0.425144	0.821803	0.644716	0.784514
Q9UL33	TPC2L_HUMAN	TRAPPC2L	Trafficking protein particle complex subunit 2-like protein	42489.1	98377.7	99736.8	118045	0.00302719	0.012327	0.0112034	0.00975897	0.00439561	0.999812	0.947193	0.96595	0.431898	0.426012	0.35994	0.986373	0.833393	0.844906
O95298	NDUC2_HUMAN	NDUFC2	NADH dehydrogenase [ubiquinone] 1 subunit C2	1.29769e+06	1.13869e+06	1.1241e+06	1.04879e+06	0.000681761	0.00405559	0.0170386	0.00977524	0.000409541	0.988333	0.167782	0.270008	1.13964	1.15443	1.23733	1.01298	1.08572	1.07181
Q86U42	PABP2_HUMAN	PABPN1	Polyadenylate-binding protein 2	1.88998e+06	2.19582e+06	2.27547e+06	2.08491e+06	0.0112226	0.0330674	0.0377295	0.00979392	0.241336	0.866009	0.677953	0.277384	0.860716	0.830586	0.906502	0.964994	1.0532	1.0914
O75143	ATG13_HUMAN	ATG13	Autophagy-related protein 13	34530.5	39324.9	48525.7	60736.3	0.000174064	0.00146921	0.456198	0.00982274	0.000160519	0.134219	0.00170362	0.101647	0.878083	0.711592	0.568532	0.810393	0.64747	0.798958
Q8NDV7	TNR6A_HUMAN	TNRC6A	Trinucleotide repeat-containing gene 6A protein	36864.9	38329.1	53514.9	57098.9	0.0009431	0.00518117	0.974437	0.00985957	0.00320904	0.0204653	0.00655062	0.912493	0.9618	0.688872	0.645632	0.716233	0.671275	0.937231
P46060	RAGP1_HUMAN	RANGAP1	Ran GTPase-activating protein 1	1.08291e+06	1.20707e+06	1.24601e+06	1.10836e+06	0.00579505	0.0199165	0.0435296	0.00987325	0.903483	0.830473	0.136187	0.0323401	0.897136	0.869099	0.977038	0.968748	1.08906	1.1242
Q96CB9	NSUN4_HUMAN	NSUN4	5-methylcytosine rRNA methyltransferase NSUN4	512375	449212	469009	437499	8.10195e-05	0.000830168	0.000405108	0.00988495	7.71452e-05	0.264858	0.677043	0.0420752	1.14061	1.09246	1.17115	0.95779	1.02677	1.07202
Q9UMY4	SNX12_HUMAN	SNX12	Sorting nexin-12	715282	791322	855958	1.00947e+06	5.77452e-05	0.000642428	0.178187	0.00989457	3.73444e-05	0.367375	0.000936663	0.0165324	0.903908	0.835652	0.708569	0.924488	0.783895	0.847924
Q9BVL2	NUP58_HUMAN	NUP58	Nucleoporin p58/p45	412522	478263	530932	469879	0.0167316	0.0446966	0.169853	0.00989963	0.224383	0.382357	0.997711	0.299818	0.862542	0.776977	0.877932	0.900799	1.01784	1.12993
Q9NQ34	TMM9B_HUMAN	TMEM9B	Transmembrane protein 9B	418973	428221	485106	485339	0.00222218	0.00977789	0.950992	0.00995019	0.0097076	0.0250117	0.0243986	0.999999	0.978404	0.863673	0.863259	0.882737	0.882313	0.99952
Q5VIR6	VPS53_HUMAN	VPS53	Vacuolar protein sorting-associated protein 53 homolog	321857	380549	385698	347140	0.00701	0.0230953	0.0169678	0.00995391	0.379029	0.989646	0.271964	0.172516	0.845769	0.83448	0.927167	0.986653	1.09624	1.11107
Q16555	DPYL2_HUMAN	DPYSL2	Dihydropyrimidinase-related protein 2	2.57983e+06	2.87132e+06	3.01026e+06	3.20189e+06	0.00111838	0.00587549	0.0798212	0.00997873	0.000760853	0.640414	0.0747948	0.447278	0.898483	0.857014	0.805722	0.953845	0.896758	0.94015
Q7Z569	BRAP_HUMAN	BRAP	BRCA1-associated protein	79797.8	87781.8	104427	98324.8	0.00959177	0.029321	0.584263	0.00998802	0.0486844	0.0938875	0.369252	0.801749	0.909047	0.764149	0.811573	0.840604	0.892773	1.06206
Q07955	SRSF1_HUMAN	SRSF1	Serine/arginine-rich splicing factor 1	1.18177e+07	1.13167e+07	1.00622e+07	9.45708e+06	0.000560966	0.00350749	0.715457	0.0100098	0.000820422	0.0641877	0.00479829	0.471801	1.04428	1.17447	1.24962	1.12467	1.19663	1.06398
Q86TU7	SETD3_HUMAN	SETD3	Actin-histidine N-methyltransferase	296147	323858	329643	334079	0.00375765	0.0144722	0.0313913	0.0100254	0.00428936	0.912807	0.671021	0.959451	0.914434	0.898386	0.886457	0.982451	0.969406	0.986722
Q9Y678	COPG1_HUMAN	COPG1	Coatomer subunit gamma-1	1.4637e+06	1.6652e+06	1.63565e+06	1.65061e+06	0.00215423	0.0095681	0.00337661	0.0100703	0.00574025	0.918698	0.989073	0.987619	0.878993	0.894874	0.886764	1.01807	1.00884	0.990938
Q8NC60	NOA1_HUMAN	NOA1	Nitric oxide-associated protein 1	618976	750404	789084	775418	0.00775842	0.0249273	0.0433814	0.0101059	0.0166823	0.837767	0.945694	0.991364	0.824858	0.784424	0.798248	0.950981	0.967741	1.01762
Q6P1N9	TATD1_HUMAN	TATDN1	Deoxyribonuclease TATDN1	237613	257274	296623	262699	0.0160327	0.0433112	0.528821	0.0101126	0.338529	0.111409	0.982066	0.19983	0.923578	0.801058	0.904506	0.867342	0.97935	1.12914
Q96SI9	STRBP_HUMAN	STRBP	Spermatid perinuclear RNA-binding protein	641517	720631	769082	833534	0.000847074	0.00477265	0.121514	0.0101153	0.000581668	0.499009	0.0360613	0.358113	0.890215	0.834134	0.769635	0.937003	0.864549	0.922675
Q9Y6D6	BIG1_HUMAN	ARFGEF1	Brefeldin A-inhibited guanine nucleotide-exchange protein 1	23333	31852.2	35030.4	43969.4	0.00058797	0.003625	0.0537546	0.0101253	0.000341052	0.775931	0.0459496	0.220188	0.732538	0.666078	0.530664	0.909274	0.724418	0.796699
P07339	CATD_HUMAN	CTSD	Cathepsin D	1.29829e+06	1.3955e+06	1.66315e+06	1.75284e+06	0.00156725	0.00753308	0.650975	0.0101665	0.00265928	0.0788273	0.0203381	0.861109	0.930345	0.780624	0.74068	0.83907	0.796135	0.94883
Q9UKM9	RALY_HUMAN	RALY	RNA-binding protein Raly	2.23514e+06	2.04152e+06	2.05307e+06	1.82841e+06	9.77101e-06	0.000173128	0.00662446	0.0102411	4.60864e-06	0.994154	0.00136533	0.000909923	1.09484	1.08868	1.22245	0.994377	1.11655	1.12287
Q92797	SYMPK_HUMAN	SYMPK	Symplekin	461203	495923	502204	481406	0.0102675	0.0308623	0.0285295	0.0102757	0.251936	0.935232	0.56762	0.276606	0.92999	0.918358	0.958034	0.987492	1.03015	1.0432
Q10567	AP1B1_HUMAN	AP1B1	AP-1 complex subunit beta-1	643343	719833	698615	697738	0.00125725	0.00640154	0.000972996	0.0102983	0.0116774	0.521958	0.481792	0.999858	0.893739	0.920884	0.922041	1.03037	1.03167	1.00126
O94979	SC31A_HUMAN	SEC31A	Protein transport protein Sec31A	1.45237e+06	1.56183e+06	1.66865e+06	1.91457e+06	4.53289e-05	0.000531167	0.23238	0.0103089	3.14803e-05	0.299642	0.000577713	0.0126493	0.929918	0.870389	0.758589	0.935985	0.815758	0.871551
Q15257	PTPA_HUMAN	PTPA	Serine/threonine-protein phosphatase 2A activator	742055	895691	931123	1.07195e+06	0.000369025	0.00257811	0.0351315	0.0103096	0.000195724	0.894914	0.0369485	0.121285	0.828472	0.796946	0.69225	0.961947	0.835574	0.868628
P47895	AL1A3_HUMAN	ALDH1A3	Aldehyde dehydrogenase family 1 member A3	118217	118864	132190	207140	5.02911e-10	8.98308e-08	0.995602	0.0103133	1.34517e-09	0.0153596	1.53895e-09	1.58606e-08	0.994553	0.894298	0.570711	0.899196	0.573837	0.638167
O75643	U520_HUMAN	SNRNP200	U5 small nuclear ribonucleoprotein 200 kDa helicase	1.59571e+06	1.67344e+06	1.74119e+06	1.67348e+06	0.0176456	0.0465559	0.209536	0.0103553	0.206631	0.330575	1	0.334706	0.953551	0.916444	0.953525	0.961086	0.999973	1.04046
Q92908	GATA6_HUMAN	GATA6	Transcription factor GATA-6	106942	143476	150844	110447	0.003859	0.0147337	0.0279348	0.0103558	0.971394	0.940071	0.0593579	0.0221476	0.745364	0.708952	0.96826	0.951149	1.29904	1.36576
Q9NZN5	ARHGC_HUMAN	ARHGEF12	Rho guanine nucleotide exchange factor 12	40692.5	62640.7	72191.5	71799.2	0.00702162	0.023122	0.0469509	0.0103956	0.0124335	0.823648	0.870635	0.999592	0.649618	0.563674	0.566754	0.867702	0.872443	1.00546
Q6P6C2	ALKB5_HUMAN	ALKBH5	RNA demethylase ALKBH5	323737	320055	344671	325916	0.00301338	0.0122859	0.898063	0.0103964	0.97256	0.00316089	0.684626	0.0219891	1.0115	0.939263	0.993314	0.928582	0.982018	1.05755
Q9BRJ6	CG050_HUMAN	C7orf50	Uncharacterized protein C7orf50	1.81755e+06	1.81365e+06	1.68721e+06	1.65237e+06	0.000451766	0.00299861	0.999208	0.010494	0.0016623	0.0131218	0.00205405	0.706037	1.00215	1.07725	1.09996	1.07494	1.09761	1.02109
P00387	NB5R3_HUMAN	CYB5R3	NADH-cytochrome b5 reductase 3	2.55487e+06	2.96171e+06	3.25209e+06	2.82206e+06	0.0161262	0.043448	0.133107	0.0105011	0.386075	0.479769	0.883828	0.176922	0.862634	0.785609	0.90532	0.910709	1.04948	1.15238
O43676	NDUB3_HUMAN	NDUFB3	NADH dehydrogenase [ubiquinone] 1 beta subcomplex subunit 3	760701	850861	880301	937321	0.00104185	0.00558335	0.0541956	0.0105667	0.000662596	0.786323	0.0945793	0.385833	0.894037	0.864137	0.811569	0.966556	0.907758	0.939167
P16278	BGAL_HUMAN	GLB1	Beta-galactosidase	262769	300643	321378	330965	0.0039099	0.0148765	0.0939119	0.0105703	0.00406965	0.603094	0.314095	0.943975	0.874024	0.817632	0.793949	0.935481	0.908384	0.971035
Q8WVM7	STAG1_HUMAN	STAG1	Cohesin subunit SA-1	632482	756261	796114	794430	0.00677672	0.0225289	0.0468698	0.0106368	0.0112526	0.830494	0.845681	0.999987	0.836327	0.794462	0.796145	0.949941	0.951954	1.00212
Q9H0L4	CSTFT_HUMAN	CSTF2T	Cleavage stimulation factor subunit 2 tau variant	658942	756207	757211	740682	0.0062309	0.021021	0.010938	0.0106446	0.0311061	0.999999	0.93107	0.926144	0.871378	0.870223	0.889643	0.998674	1.02096	1.02232
Q9NPD3	EXOS4_HUMAN	EXOSC4	Exosome complex component RRP41	516432	603414	689632	542059	0.0114952	0.0336159	0.195655	0.0106835	0.863938	0.359404	0.542991	0.0414885	0.85585	0.748852	0.952723	0.87498	1.11319	1.27224
P28074	PSB5_HUMAN	PSMB5	Proteasome subunit beta type-5	1.42812e+06	1.61479e+06	1.65403e+06	1.80332e+06	0.000499056	0.00321468	0.0312277	0.0108102	0.000271748	0.928259	0.0607936	0.165203	0.884399	0.863418	0.791939	0.976276	0.895455	0.917214
Q96G01	BICD1_HUMAN	BICD1	Protein bicaudal D homolog 1	22219.9	34626.4	38359.6	34894.7	0.00995748	0.0301738	0.0339975	0.0108118	0.0371467	0.911968	0.99995	0.893074	0.641703	0.579252	0.636769	0.902678	0.992311	1.0993
Q9NR50	EI2BG_HUMAN	EIF2B3	Translation initiation factor eIF-2B subunit gamma	454167	480717	497485	489964	0.0118594	0.0345048	0.128304	0.0108418	0.0330695	0.502496	0.85366	0.918021	0.94477	0.912925	0.926939	0.966294	0.981127	1.01535
Q96TC7	RMD3_HUMAN	RMDN3	Regulator of microtubule dynamics protein 3	748050	700537	670348	594079	2.6556e-05	0.000358914	0.149996	0.0108427	1.67598e-05	0.449319	0.000420199	0.00513779	1.06782	1.11591	1.25918	1.04504	1.1792	1.12838
O95757	HS74L_HUMAN	HSPA4L	Heat shock 70 kDa protein 4L	1.15494e+06	1.25466e+06	1.29587e+06	1.33476e+06	0.00243366	0.0104239	0.0757782	0.0109094	0.0019897	0.687898	0.204476	0.754321	0.920514	0.891244	0.865273	0.968202	0.939989	0.97086
P61586	RHOA_HUMAN	RHOA	Transforming protein RhoA	4.56213e+06	4.79153e+06	5.58936e+06	5.51565e+06	0.00423273	0.0157601	0.842752	0.010933	0.0164296	0.0460508	0.0686896	0.995312	0.952123	0.816218	0.827125	0.85726	0.868717	1.01336
Q00610	CLH1_HUMAN	CLTC	Clathrin heavy chain 1	6.60957e+06	7.13471e+06	7.67688e+06	7.62075e+06	0.00779581	0.0250352	0.267034	0.0110276	0.0152366	0.276612	0.355932	0.997631	0.926397	0.860972	0.867312	0.929377	0.936221	1.00736
P40337	VHL_HUMAN	VHL	von Hippel-Lindau disease tumor suppressor	34136.5	59944.8	175193	96723.6	0.0149668	0.0411464	0.757812	0.0111001	0.367625	0.0623468	0.893141	0.197007	0.569466	0.194851	0.352928	0.342164	0.619754	1.81128
Q7L2H7	EIF3M_HUMAN	EIF3M	Eukaryotic translation initiation factor 3 subunit M	826234	919144	1.06317e+06	1.00151e+06	0.0121893	0.0351507	0.442356	0.0111277	0.0519329	0.156791	0.522322	0.814095	0.898916	0.777142	0.824988	0.864532	0.917758	1.06157
Q13356	PPIL2_HUMAN	PPIL2	RING-type E3 ubiquitin-protein ligase PPIL2	128551	145663	151864	169760	0.000350091	0.0024746	0.058374	0.011137	0.000189892	0.779435	0.0213404	0.109087	0.882526	0.846493	0.757252	0.95917	0.858051	0.894576
Q14938	NFIX_HUMAN	NFIX	Nuclear factor 1 X-type	34244.7	42282.4	57719.3	63420.5	0.00216146	0.00958086	0.572828	0.011144	0.00340768	0.107635	0.0332731	0.899823	0.809904	0.593297	0.539962	0.732552	0.666699	0.910105
Q9BXJ9	NAA15_HUMAN	NAA15	N-alpha-acetyltransferase 15, NatA auxiliary subunit	1.31104e+06	1.25599e+06	1.22711e+06	1.22637e+06	0.0072	0.0235919	0.111156	0.0113046	0.0107324	0.566237	0.549093	0.99999	1.04383	1.0684	1.06904	1.02354	1.02415	1.0006
Q9UEU0	VTI1B_HUMAN	VTI1B	Vesicle transport through interaction with t-SNAREs homolog 1B	178589	192313	202468	211009	0.00168981	0.00795436	0.168929	0.011306	0.00138085	0.422311	0.0641928	0.615793	0.928638	0.882058	0.846356	0.94984	0.911395	0.959524
Q6NYC1	JMJD6_HUMAN	JMJD6	Bifunctional arginine demethylase and lysyl-hydroxylase JMJD6	630122	543533	536401	560649	0.00916077	0.0284467	0.0180664	0.0113104	0.0723461	0.992941	0.853595	0.715301	1.15931	1.17472	1.12392	1.0133	0.969471	0.95675
Q9H7B4	SMYD3_HUMAN	SMYD3	Histone-lysine N-methyltransferase SMYD3	293220	267454	270189	290277	0.00140737	0.00697251	0.00473122	0.011318	0.963676	0.956604	0.0107187	0.0259027	1.09634	1.08524	1.01014	0.989878	0.921376	0.930797
Q9H832	UBE2Z_HUMAN	UBE2Z	Ubiquitin-conjugating enzyme E2 Z	505926	539732	575291	635814	0.00012273	0.00114347	0.267019	0.0113682	8.75843e-05	0.283509	0.0016631	0.042862	0.937366	0.879426	0.795713	0.938189	0.848882	0.90481
P34741	SDC2_HUMAN	SDC2	Syndecan-2	147894	163296	193820	426284	1.80474e-08	1.38692e-06	0.48239	0.0113713	2.47687e-08	0.142121	8.22692e-08	7.20483e-07	0.905684	0.76305	0.346938	0.842512	0.383068	0.454673
Q8NCH0	CHSTE_HUMAN	CHST14	Carbohydrate sulfotransferase 14	196625	240009	258187	222394	0.0159726	0.0432458	0.0879774	0.0114247	0.346756	0.651865	0.806399	0.216071	0.819239	0.76156	0.884129	0.929595	1.07921	1.16094
Q8TE02	ELP5_HUMAN	ELP5	Elongator complex protein 5	176305	125769	134858	122238	0.000787858	0.00453173	0.00192051	0.0114441	0.00107117	0.727353	0.983671	0.521521	1.40182	1.30733	1.44231	0.932599	1.02888	1.10324
Q14498	RBM39_HUMAN	RBM39	RNA-binding protein 39	3.38719e+06	3.16238e+06	3.16473e+06	2.58875e+06	2.43398e-08	1.7113e-06	0.0110035	0.0114482	1.96032e-08	0.999996	5.41315e-07	5.2941e-07	1.07109	1.07029	1.30843	0.999258	1.22159	1.22249
Q9NQE9	HINT3_HUMAN	HINT3	Adenosine 5'-monophosphoramidase HINT3	336638	507547	448808	336851	0.000276387	0.00207745	0.000953156	0.0114512	0.999988	0.480897	0.00100274	0.0121001	0.663264	0.750071	0.999368	1.13088	1.50674	1.33236
Q9BRX2	PELO_HUMAN	PELO	Protein pelota homolog	608941	532734	543633	467311	1.5792e-05	0.000248164	0.00388036	0.0114532	7.41627e-06	0.921444	0.00454675	0.00158795	1.14305	1.12013	1.30308	0.979953	1.14	1.16332
O95684	CEP43_HUMAN	CEP43	Centrosomal protein 43	482239	559756	601975	609917	0.00603822	0.0205387	0.0997791	0.0114902	0.00772334	0.609705	0.479561	0.99558	0.861516	0.801094	0.790663	0.929866	0.917758	0.986979
Q96QD9	UIF_HUMAN	FYTTD1	UAP56-interacting factor	140228	97882.3	115067	104308	0.000100701	0.000990376	9.05254e-05	0.0115019	0.00055129	0.0441309	0.627849	0.309916	1.43262	1.21866	1.34436	0.850652	0.938394	1.10315
Q63ZY3	KANK2_HUMAN	KANK2	KN motif and ankyrin repeat domain-containing protein 2	696321	744991	837618	857151	0.00326245	0.0130045	0.50178	0.0115247	0.00527791	0.136029	0.0643162	0.968272	0.93467	0.83131	0.812367	0.889416	0.869148	0.977213
Q8N884	CGAS_HUMAN	CGAS	Cyclic GMP-AMP synthase	330016	327319	229331	225038	0.0018267	0.00843061	0.998893	0.0115505	0.0112302	0.0148365	0.0144239	0.999998	1.00824	1.43904	1.46649	1.42728	1.4545	1.01908
Q9BYT8	NEUL_HUMAN	NLN	Neurolysin, mitochondrial	340894	398770	405046	400651	0.00676073	0.0224983	0.0196959	0.0115589	0.0163907	0.989709	0.999564	0.997027	0.854864	0.841618	0.850849	0.984505	0.995304	1.01097
Q9H223	EHD4_HUMAN	EHD4	EH domain-containing protein 4	630099	552801	547257	483221	0.000114462	0.00109238	0.0179602	0.0115865	5.42828e-05	0.994191	0.0148145	0.0229767	1.13983	1.15138	1.30396	1.01013	1.14399	1.13252
Q7L3B6	CD37L_HUMAN	CDC37L1	Hsp90 co-chaperone Cdc37-like 1	167278	218156	212353	225456	0.001774	0.00823921	0.00513592	0.0115865	0.00234359	0.964379	0.965711	0.788396	0.76678	0.787733	0.741951	1.02733	0.967619	0.941881
P60953	CDC42_HUMAN	CDC42	Cell division control protein 42 homolog	2.6583e+06	2.8244e+06	3.32244e+06	2.96101e+06	0.0151457	0.0415344	0.773657	0.0115934	0.299079	0.0618637	0.810909	0.256845	0.941192	0.800104	0.897766	0.850097	0.953861	1.12206
P35268	RL22_HUMAN	RPL22	60S ribosomal protein L22	2.44953e+07	3.13807e+07	3.6931e+07	2.87375e+07	0.0175095	0.0463066	0.143984	0.0116357	0.433883	0.48514	0.864744	0.167398	0.780585	0.663272	0.85238	0.849711	1.09198	1.28512
O14745	NHRF1_HUMAN	SLC9A3R1	Na(+)/H(+) exchange regulatory cofactor NHE-RF1	1.09003e+06	1.32037e+06	1.33419e+06	1.37109e+06	0.00379251	0.014581	0.0162299	0.0117098	0.00499275	0.997567	0.903267	0.959395	0.825546	0.816995	0.795006	0.989642	0.963006	0.973085
P27540	ARNT_HUMAN	ARNT	Aryl hydrocarbon receptor nuclear translocator	53977.7	93963.3	98122.2	116658	0.00244586	0.0104626	0.0193734	0.011725	0.00220511	0.991351	0.601828	0.765445	0.574455	0.550107	0.462699	0.957615	0.805458	0.841109
Q9UK61	TASOR_HUMAN	TASOR	Protein TASOR	203976	211045	234953	226897	0.00903067	0.0281527	0.785426	0.0117515	0.0534658	0.0603436	0.244039	0.821182	0.966508	0.868157	0.898981	0.89824	0.930133	1.03551
Q86VQ1	GLCI1_HUMAN	GLCCI1	Glucocorticoid-induced transcript 1 protein	44627.9	71074.7	69567.6	76837.5	0.00248744	0.0105625	0.00987119	0.011782	0.00293043	0.999604	0.892217	0.849088	0.627901	0.641504	0.580809	1.02166	0.925001	0.905386
O60841	IF2P_HUMAN	EIF5B	Eukaryotic translation initiation factor 5B	960161	1.01879e+06	1.04975e+06	953256	0.00360122	0.0140665	0.105188	0.011811	0.990009	0.600283	0.0633747	0.00699334	0.942451	0.914656	1.00724	0.970508	1.06875	1.10123
P13929	ENOB_HUMAN	ENO3	Beta-enolase	874961	978920	1.10271e+06	1.10332e+06	0.00684359	0.022662	0.29277	0.0118208	0.0116999	0.266787	0.264552	1	0.893803	0.793467	0.793024	0.887743	0.887247	0.999441
P53597	SUCA_HUMAN	SUCLG1	Succinate--CoA ligase [ADP/GDP-forming] subunit alpha, mitochondrial	1.9427e+06	1.94952e+06	2.26014e+06	1.8428e+06	0.00170779	0.0080105	0.999379	0.0118576	0.598417	0.0145752	0.53036	0.00137519	0.996505	0.85955	1.05421	0.862564	1.05791	1.22647
Q9Y289	SC5A6_HUMAN	SLC5A6	Sodium-dependent multivitamin transporter	50288.8	79139	79446	80389.1	0.00494364	0.0177955	0.0125638	0.0118927	0.0103914	0.999988	0.999513	0.999824	0.635449	0.632993	0.625568	0.996136	0.98445	0.988269
Q9Y248	PSF2_HUMAN	GINS2	DNA replication complex GINS protein PSF2	112868	185676	181972	154560	0.0070097	0.0230953	0.0096953	0.0119344	0.0987336	0.999361	0.556862	0.626087	0.607878	0.620251	0.730255	1.02035	1.20132	1.17735
P78536	ADA17_HUMAN	ADAM17	Disintegrin and metalloproteinase domain-containing protein 17	126740	127171	163000	152078	0.00426253	0.0158621	0.999999	0.011936	0.0704155	0.011696	0.0690379	0.741459	0.99661	0.777544	0.833387	0.780189	0.836221	1.07182
Q9P2N7	KLH13_HUMAN	KLHL13	Kelch-like protein 13	79879.1	153551	187267	237369	0.00314494	0.012666	0.0409835	0.0119367	0.0027862	0.893142	0.439694	0.831551	0.520212	0.426552	0.336518	0.819958	0.646887	0.788928
Q9UK76	JUPI1_HUMAN	JPT1	Jupiter microtubule associated homolog 1	3.0133e+06	3.66658e+06	3.74198e+06	4.88067e+06	2.16976e-05	0.000311889	0.0215781	0.0120201	1.05381e-05	0.986516	0.00141655	0.00246193	0.821827	0.805268	0.617394	0.979851	0.751245	0.766694
Q9NTJ3	SMC4_HUMAN	SMC4	Structural maintenance of chromosomes protein 4	1.53033e+06	1.543e+06	1.61232e+06	1.80202e+06	1.84257e-07	8.52787e-06	0.92779	0.0120773	3.01668e-07	0.0349763	5.40479e-07	1.85346e-05	0.991788	0.949144	0.849229	0.957003	0.856261	0.894732
P10768	ESTD_HUMAN	ESD	S-formylglutathione hydrolase	1.02612e+06	1.14664e+06	1.20144e+06	1.37347e+06	0.000143221	0.00128783	0.0861534	0.0122611	7.79476e-05	0.682541	0.00485222	0.0343838	0.894889	0.854073	0.7471	0.95439	0.834852	0.87475
Q96SZ6	CK5P1_HUMAN	CDK5RAP1	Mitochondrial tRNA methylthiotransferase CDK5RAP1	105057	126774	148162	144947	0.0093915	0.0288556	0.197788	0.0122727	0.0173597	0.394302	0.498998	0.997093	0.828696	0.709066	0.724793	0.855641	0.874618	1.02218
Q13190	STX5_HUMAN	STX5	Syntaxin-5	146423	164428	180087	174496	0.0126948	0.0362576	0.195028	0.0122846	0.0325818	0.399173	0.711401	0.942846	0.890497	0.813066	0.839119	0.913047	0.942303	1.03204
P63218	GBG5_HUMAN	GNG5	Guanine nucleotide-binding protein G(I)/G(S)/G(O) subunit gamma-5	412700	455231	526752	531277	0.00557157	0.019381	0.427416	0.0123095	0.00990523	0.179428	0.147589	0.99927	0.906574	0.783481	0.776808	0.864222	0.856862	0.991483
Q15691	MARE1_HUMAN	MAPRE1	Microtubule-associated protein RP/EB family member 1	2.51033e+06	2.8556e+06	2.88009e+06	2.93705e+06	0.00381703	0.0146484	0.0179376	0.0123712	0.00466431	0.996437	0.864111	0.941111	0.87909	0.871616	0.854711	0.991498	0.972267	0.980605
O00151	PDLI1_HUMAN	PDLIM1	PDZ and LIM domain protein 1	1.55714e+06	1.95756e+06	1.91309e+06	1.86258e+06	0.0048271	0.0174807	0.00588902	0.0123788	0.0298472	0.972598	0.789635	0.95695	0.79545	0.81394	0.836013	1.02324	1.05099	1.02712
P34932	HSP74_HUMAN	HSPA4	Heat shock 70 kDa protein 4	2.80057e+06	3.22097e+06	3.52536e+06	3.5909e+06	0.00577646	0.0198837	0.183596	0.012433	0.00729633	0.422672	0.282318	0.989532	0.869481	0.794406	0.779907	0.913656	0.89698	0.981748
Q15750	TAB1_HUMAN	TAB1	TGF-beta-activated kinase 1 and MAP3K7-binding protein 1	157449	182355	191770	196343	0.00546953	0.0191869	0.0636123	0.0124394	0.00623811	0.78632	0.560627	0.977818	0.863423	0.821034	0.801911	0.950905	0.928758	0.976709
P68036	UB2L3_HUMAN	UBE2L3	Ubiquitin-conjugating enzyme E2 L3	814401	893088	1.04044e+06	1.13743e+06	0.00106215	0.00566109	0.537941	0.0124916	0.00124291	0.132162	0.0127739	0.545252	0.911893	0.782746	0.716003	0.858374	0.785183	0.914733
O75459	PAGE1_HUMAN	PAGE1	P antigen family member 1	113087	141649	174785	126516	0.0145956	0.0403101	0.280742	0.0125329	0.858229	0.291765	0.693042	0.0497068	0.798361	0.647006	0.893855	0.810418	1.11961	1.38153
Q9UL63	MKLN1_HUMAN	MKLN1	Muskelin	54555.1	65462.1	71202.9	62862.3	0.0184717	0.0482147	0.0955392	0.0125372	0.222734	0.65406	0.9491	0.36201	0.833385	0.766192	0.867851	0.919373	1.04136	1.13268
Q9P0W2	HM20B_HUMAN	HMG20B	SWI/SNF-related matrix-associated actin-dependent regulator of chromatin subfamily E member 1-related	237458	310159	364210	372972	0.00682916	0.0226462	0.119652	0.0126415	0.00886486	0.577202	0.462645	0.996852	0.765601	0.651982	0.636665	0.851595	0.831589	0.976508
Q9Y256	FACE2_HUMAN	RCE1	CAAX prenyl protease 2	30315.1	60482.5	85310.5	74793.5	0.010978	0.0324916	0.129178	0.0126559	0.021821	0.550324	0.729899	0.989049	0.501222	0.355351	0.405318	0.708969	0.808659	1.14061
Q9GZR1	SENP6_HUMAN	SENP6	Sentrin-specific protease 6	33345.3	44970.3	75013.2	59735.7	0.0131823	0.0372794	0.432001	0.0126863	0.0479953	0.181779	0.507709	0.870119	0.741497	0.444526	0.558214	0.599498	0.752821	1.25575
Q9BWG6	SCNM1_HUMAN	SCNM1	Sodium channel modifier 1	73002.6	93761.4	94035.1	75712.8	0.0032934	0.0130727	0.0156027	0.0127377	0.965521	0.999411	0.0351594	0.0287162	0.7786	0.776334	0.964205	0.997089	1.23838	1.242
O00442	RTCA_HUMAN	RTCA	RNA 3'-terminal phosphate cyclase	223715	211456	193093	203494	0.0175638	0.0463946	0.49266	0.0127541	0.12165	0.153165	0.759168	0.574247	1.05797	1.15858	1.09937	1.0951	1.03912	0.948887
O43257	ZNHI1_HUMAN	ZNHIT1	Zinc finger HIT domain-containing protein 1	34707.3	41247.6	51003	53565.1	0.0041706	0.0156079	0.360503	0.0128131	0.00561968	0.227967	0.108148	0.963267	0.841438	0.680495	0.647946	0.808729	0.770045	0.952168
Q9NZ32	ARP10_HUMAN	ACTR10	Actin-related protein 10	316215	325107	340041	370438	1.65661e-05	0.000255326	0.500759	0.012824	1.52446e-05	0.150412	0.000103604	0.00383204	0.972648	0.92993	0.853623	0.956081	0.877629	0.917943
O75368	SH3L1_HUMAN	SH3BGRL	SH3 domain-binding glutamic acid-rich-like protein	238393	285795	314486	340629	0.00253023	0.010692	0.11318	0.012848	0.00202257	0.602388	0.142757	0.707604	0.834141	0.758042	0.699863	0.90877	0.839023	0.923251
Q96PU8	QKI_HUMAN	QKI	Protein quaking	430208	455221	518336	509450	0.00730909	0.023796	0.662491	0.0128583	0.0225046	0.0955314	0.160362	0.988153	0.945053	0.829978	0.844454	0.878234	0.893552	1.01744
Q8ND24	RN214_HUMAN	RNF214	RING finger protein 214	104668	115623	130358	143038	0.00117853	0.00608509	0.366495	0.01291	0.00111053	0.225155	0.0199636	0.495382	0.905256	0.80293	0.731752	0.886965	0.808337	0.911352
Q8N5V2	NGEF_HUMAN	NGEF	Ephexin-1	38280.9	70119.8	69664	90346.7	0.00138793	0.00690563	0.0120129	0.0129828	0.00104557	0.999967	0.49753	0.473075	0.545935	0.549507	0.423711	1.00654	0.776119	0.771075
P61981	1433G_HUMAN	YWHAG	14-3-3 protein gamma	7.52e+06	9.15016e+06	9.3358e+06	9.23758e+06	0.0073978	0.0240374	0.0218501	0.0130093	0.016625	0.990518	0.998573	0.998963	0.821843	0.805501	0.814065	0.980116	0.990536	1.01063
Q13098	CSN1_HUMAN	GPS1	COP9 signalosome complex subunit 1	921325	1.03464e+06	1.04233e+06	1.11512e+06	0.000736023	0.00431239	0.0184275	0.0130372	0.000423851	0.997116	0.162004	0.219293	0.890479	0.883911	0.826213	0.992624	0.92783	0.934725
O75688	PPM1B_HUMAN	PPM1B	Protein phosphatase 1B	46908.4	58941.1	65031.7	72399.8	0.00240834	0.0103355	0.0872337	0.0131744	0.00182252	0.701838	0.165695	0.663207	0.795852	0.721316	0.647907	0.906344	0.814105	0.89823
Q9BVQ7	SPA5L_HUMAN	SPATA5L1	Spermatogenesis-associated protein 5-like protein 1	502441	452526	450752	433554	0.00169957	0.00798328	0.0166248	0.0132031	0.00127971	0.999139	0.464133	0.5374	1.1103	1.11467	1.15889	1.00394	1.04376	1.03967
P02511	CRYAB_HUMAN	CRYAB	Alpha-crystallin B chain	1.14283e+06	1.00806e+06	960248	938345	0.00544683	0.0191377	0.0864569	0.013296	0.0058263	0.707867	0.438133	0.963229	1.1337	1.19014	1.21792	1.04979	1.07429	1.02334
Q13126	MTAP_HUMAN	MTAP	S-methyl-5'-thioadenosine phosphorylase	1.32135e+06	1.5282e+06	1.81635e+06	1.73054e+06	0.0120861	0.034957	0.338483	0.013352	0.0311407	0.253067	0.476192	0.961327	0.86464	0.727472	0.763544	0.841358	0.883078	1.04959
Q9NR45	SIAS_HUMAN	NANS	Sialic acid synthase	831530	906834	1.00618e+06	969257	0.0145814	0.0403101	0.34779	0.0134005	0.0477179	0.24641	0.6042	0.884553	0.91696	0.826423	0.857904	0.901264	0.935596	1.03809
Q53GQ0	DHB12_HUMAN	HSD17B12	Very-long-chain 3-oxoacyl-CoA reductase	668728	766249	889366	791742	0.0212111	0.0531001	0.36952	0.0134176	0.16865	0.230446	0.946102	0.474911	0.872729	0.751915	0.844629	0.861567	0.967802	1.1233
O75063	XYLK_HUMAN	FAM20B	Glycosaminoglycan xylosylkinase	243972	300865	285631	296678	0.00127556	0.00648474	0.00169208	0.0134793	0.00321573	0.629392	0.979762	0.838924	0.810903	0.854151	0.822347	1.05333	1.01411	0.962765
Q13610	PWP1_HUMAN	PWP1	Periodic tryptophan protein 1 homolog	542079	637105	657643	616923	0.0143192	0.0397461	0.037918	0.0135799	0.106619	0.93421	0.92791	0.642067	0.850848	0.824276	0.878682	0.96877	1.03271	1.066
Q15036	SNX17_HUMAN	SNX17	Sorting nexin-17	339484	289964	303261	291473	0.000804057	0.00458896	0.00125411	0.013593	0.00160875	0.520892	0.998669	0.60869	1.17078	1.11945	1.16472	0.956152	0.994823	1.04044
Q14192	FHL2_HUMAN	FHL2	Four and a half LIM domains protein 2	2.04986e+06	1.83523e+06	1.59698e+06	1.53739e+06	0.00379896	0.0145973	0.381361	0.0135946	0.00487083	0.224689	0.0875971	0.932663	1.11695	1.28359	1.33334	1.14919	1.19373	1.03876
Q06124	PTN11_HUMAN	PTPN11	Tyrosine-protein phosphatase non-receptor type 11	1.26272e+06	1.36405e+06	1.41123e+06	1.60746e+06	2.98599e-05	0.000392372	0.09484	0.013656	1.70316e-05	0.684906	0.000664626	0.00418989	0.92571	0.89476	0.785537	0.966566	0.848577	0.87793
Q6P1J9	CDC73_HUMAN	CDC73	Parafibromin	858375	803562	794571	736170	9.17083e-05	0.000915559	0.0361351	0.0137106	4.46916e-05	0.943806	0.00576014	0.0150851	1.06821	1.0803	1.166	1.01132	1.09154	1.07933
Q9BQE3	TBA1C_HUMAN	TUBA1C	Tubulin alpha-1C chain	2.70563e+07	3.11324e+07	3.70289e+07	3.59555e+07	0.00990707	0.0300624	0.485838	0.0137452	0.0258175	0.16704	0.285354	0.983297	0.86907	0.730678	0.752492	0.840759	0.865859	1.02985
P15170	ERF3A_HUMAN	GSPT1	Eukaryotic peptide chain release factor GTP-binding subunit ERF3A	2.08456e+06	2.24224e+06	2.40552e+06	2.33472e+06	0.0160018	0.043281	0.288283	0.0137947	0.0520838	0.30667	0.71337	0.870342	0.929678	0.866575	0.892851	0.932124	0.960388	1.03032
Q01105	SET_HUMAN	SET	Protein SET	7.902e+06	1.13493e+07	1.04697e+07	1.03684e+07	0.00238111	0.0102855	0.00204145	0.0137976	0.0175219	0.6875	0.608209	0.999041	0.696256	0.754749	0.76212	1.08401	1.0946	1.00977
P28062	PSB8_HUMAN	PSMB8	Proteasome subunit beta type-8	209632	255302	248720	229778	0.00442061	0.0163035	0.00500131	0.0138138	0.25577	0.934572	0.145152	0.34396	0.821113	0.842844	0.912323	1.02647	1.11108	1.08243
O75832	PSD10_HUMAN	PSMD10	26S proteasome non-ATPase regulatory subunit 10	301216	356722	383999	397090	0.00554803	0.0193595	0.101439	0.0138277	0.00585751	0.665615	0.390804	0.958907	0.844401	0.784419	0.758559	0.928965	0.898339	0.967033
Q68DK7	MSL1_HUMAN	MSL1	Male-specific lethal 1 homolog	146930	174233	174304	162518	0.00933966	0.0287917	0.0148813	0.0138314	0.186314	0.999972	0.472103	0.449604	0.843297	0.842951	0.904087	0.99959	1.07209	1.07253
Q9UQ13	SHOC2_HUMAN	SHOC2	Leucine-rich repeat protein SHOC-2	144675	180753	198115	211829	0.00410298	0.0154159	0.0794684	0.0139117	0.00368315	0.750336	0.331999	0.866956	0.800398	0.730255	0.682978	0.912365	0.853298	0.93526
P83916	CBX1_HUMAN	CBX1	Chromobox protein homolog 1	947876	1.57652e+06	1.89742e+06	1.62246e+06	0.0153754	0.0420248	0.0689395	0.0139631	0.0549599	0.796109	0.999122	0.859772	0.601244	0.49956	0.584221	0.830877	0.971687	1.16947
Q15050	RRS1_HUMAN	RRS1	Ribosome biogenesis regulatory protein homolog	1.69392e+06	1.59551e+06	1.46623e+06	1.30461e+06	0.000125691	0.00116507	0.448594	0.0140418	0.000106268	0.189347	0.00109184	0.0440828	1.06167	1.15528	1.29841	1.08817	1.22298	1.12389
P61769	B2MG_HUMAN	B2M	Beta-2-microglobulin	686215	884086	1.03156e+06	785243	0.0188646	0.0489151	0.160467	0.0140672	0.612501	0.507419	0.739309	0.119739	0.776186	0.665221	0.873889	0.857038	1.12588	1.31368
Q6P3W7	SCYL2_HUMAN	SCYL2	SCY1-like protein 2	87572.1	110996	112804	119621	0.00280438	0.0115838	0.0178842	0.0141429	0.00259048	0.999092	0.684408	0.759586	0.788965	0.77632	0.732081	0.983973	0.9279	0.943014
O95628	CNOT4_HUMAN	CNOT4	CCR4-NOT transcription complex subunit 4	43942.6	82589.3	87709.6	82261.5	0.00869318	0.0272548	0.0228272	0.0142175	0.022441	0.992738	1	0.99348	0.532061	0.501001	0.534182	0.941623	1.00399	1.06623
Q96C92	ENTR1_HUMAN	ENTR1	Endosome-associated-trafficking regulator 1	41507.9	80119.7	100891	103658	0.00887026	0.0277573	0.125411	0.0142279	0.0126203	0.599678	0.559921	0.999878	0.518073	0.411415	0.400432	0.794125	0.772925	0.973304
Q6PGN9	PSRC1_HUMAN	PSRC1	Proline/serine-rich coiled-coil protein 1	56176.3	80568.8	90276.5	91958.7	0.00812832	0.0258892	0.0666868	0.0143033	0.0112036	0.812964	0.739091	0.998971	0.697246	0.62227	0.610886	0.892467	0.876142	0.981707
Q96C86	DCPS_HUMAN	DCPS	m7GpppX diphosphatase	260068	293172	310408	328370	0.00267992	0.0111957	0.110714	0.0143483	0.00207061	0.647041	0.149162	0.679537	0.887082	0.837827	0.791996	0.944475	0.89281	0.945298
Q9Y5P4	CERT_HUMAN	CERT1	Ceramide transfer protein	135322	147761	161993	168600	0.00311726	0.0125924	0.297002	0.0143787	0.0032109	0.307643	0.0795508	0.820765	0.915819	0.835357	0.802625	0.912142	0.876401	0.960816
P51114	FXR1_HUMAN	FXR1	Fragile X mental retardation syndrome-related protein 1	2.19102e+06	2.29603e+06	2.48209e+06	2.11037e+06	0.002753	0.0114431	0.538526	0.0144395	0.705133	0.150633	0.118607	0.00224383	0.954266	0.882733	1.03822	0.925039	1.08797	1.17614
O00264	PGRC1_HUMAN	PGRMC1	Membrane-associated progesterone receptor component 1	2.74322e+06	2.93083e+06	3.07773e+06	2.90054e+06	0.0236656	0.0575657	0.205362	0.0144462	0.329101	0.429073	0.987079	0.278115	0.935988	0.891314	0.945762	0.952271	1.01044	1.06109
Q96JJ3	ELMO2_HUMAN	ELMO2	Engulfment and cell motility protein 2	571151	529643	511233	519112	0.0145084	0.0401534	0.111448	0.0144891	0.0349009	0.647943	0.902148	0.957042	1.07837	1.1172	1.10025	1.03601	1.02029	0.984822
P06746	DPOLB_HUMAN	POLB	DNA polymerase beta	79125.2	90110.4	104399	89792.4	0.0244391	0.0588623	0.324292	0.0145249	0.332854	0.283664	0.999997	0.276021	0.878092	0.757909	0.881202	0.863132	1.00354	1.16267
P55263	ADK_HUMAN	ADK	Adenosine kinase	965167	1.18575e+06	1.17457e+06	1.35933e+06	0.000293937	0.00218028	0.0096222	0.014535	0.000152767	0.995112	0.0979756	0.0658279	0.813973	0.821721	0.710032	1.00952	0.872304	0.864079
P62304	RUXE_HUMAN	SNRPE	Small nuclear ribonucleoprotein E	2.04274e+06	2.19662e+06	2.53201e+06	2.27076e+06	0.0219274	0.0544599	0.611191	0.0145444	0.318205	0.123959	0.942768	0.289587	0.929944	0.806765	0.899584	0.867541	0.967352	1.11505
Q9BV20	MTNA_HUMAN	MRI1	Methylthioribose-1-phosphate isomerase	715387	781333	859366	869969	0.00655063	0.0218984	0.342726	0.0145466	0.00969269	0.26788	0.189845	0.995337	0.915598	0.832459	0.822314	0.909197	0.898116	0.987812
Q6FI81	CPIN1_HUMAN	CIAPIN1	Anamorsin	1.294e+06	1.55302e+06	1.61148e+06	1.7427e+06	0.00219651	0.00968426	0.0408261	0.0145873	0.00154592	0.933722	0.277024	0.571133	0.833211	0.802985	0.742523	0.963724	0.891159	0.924703
O00139	KIF2A_HUMAN	KIF2A	Kinesin-like protein KIF2A	3.58605e+06	3.24328e+06	3.1707e+06	2.95026e+06	0.000752542	0.00438198	0.0502083	0.0146776	0.000417364	0.893506	0.0617416	0.195024	1.10569	1.131	1.2155	1.02289	1.09932	1.07472
Q5R3I4	TTC38_HUMAN	TTC38	Tetratricopeptide repeat protein 38	151313	172922	181370	220238	5.63883e-05	0.000633792	0.0763868	0.0147512	3.01942e-05	0.780936	0.00167949	0.00837084	0.875035	0.834276	0.687043	0.953421	0.785161	0.82352
Q9NUQ6	SPS2L_HUMAN	SPATS2L	SPATS2-like protein	425602	467546	500016	462514	0.0243417	0.0587951	0.208347	0.0147656	0.27765	0.430593	0.997164	0.33519	0.910288	0.851175	0.920193	0.935062	1.01088	1.08108
Q9BSH5	HDHD3_HUMAN	HDHD3	Haloacid dehalogenase-like hydrolase domain-containing protein 3	37212.6	45757.8	56523.4	44763.2	0.0244856	0.0589458	0.370813	0.0147667	0.403094	0.248695	0.999892	0.225791	0.813251	0.658357	0.83132	0.809538	1.02222	1.26272
Q13439	GOGA4_HUMAN	GOLGA4	Golgin subfamily A member 4	391399	446907	458410	435035	0.0157578	0.0427518	0.040727	0.0147856	0.129113	0.936456	0.901534	0.602001	0.875796	0.853819	0.899697	0.974906	1.02729	1.05373
Q15418	KS6A1_HUMAN	RPS6KA1	Ribosomal protein S6 kinase alpha-1	762901	764386	841838	898520	0.000110288	0.00106098	0.999805	0.0148099	0.000275855	0.0170413	0.000311281	0.125971	0.998057	0.906233	0.849064	0.907997	0.850717	0.936916
Q9UPU7	TBD2B_HUMAN	TBC1D2B	TBC1 domain family member 2B	36279.1	50421.1	61272	44979.4	0.0219081	0.0544531	0.161821	0.0148218	0.468368	0.521208	0.868663	0.18763	0.719523	0.5921	0.806572	0.822906	1.12098	1.36222
Q9H0R6	GATA_HUMAN	QRSL1	Glutamyl-tRNA(Gln) amidotransferase subunit A, mitochondrial	112785	223807	267255	162036	0.0160426	0.0433112	0.0495042	0.0148541	0.342819	0.899266	0.622957	0.272396	0.50394	0.422013	0.696051	0.837428	1.38122	1.64936
Q9BS40	LXN_HUMAN	LXN	Latexin	88048.6	114890	107523	129268	0.000118618	0.00112153	0.00187275	0.014861	7.2056e-05	0.63271	0.19522	0.0257014	0.766375	0.818884	0.681132	1.06852	0.888771	0.83178
O15091	MRPP3_HUMAN	PRORP	Mitochondrial ribonuclease P catalytic subunit	346640	382189	394383	371962	0.0191799	0.0494576	0.0679974	0.0149982	0.234789	0.820714	0.865791	0.394321	0.906985	0.878944	0.931924	0.969083	1.0275	1.06028
P52756	RBM5_HUMAN	RBM5	RNA-binding protein 5	585580	632106	675478	623645	0.0246621	0.0592481	0.273821	0.0150598	0.421019	0.344723	0.987594	0.21786	0.926396	0.866912	0.938965	0.93579	1.01357	1.08311
Q8IZ21	PHAR4_HUMAN	PHACTR4	Phosphatase and actin regulator 4	150479	173866	183710	196815	0.00240143	0.010326	0.0946701	0.0150693	0.00173323	0.717606	0.14617	0.600733	0.865486	0.819109	0.764571	0.946415	0.883401	0.933418
P51784	UBP11_HUMAN	USP11	Ubiquitin carboxyl-terminal hydrolase 11	89939.6	93108.1	109044	118784	0.000494371	0.00319072	0.889615	0.015126	0.000823139	0.0526098	0.00264981	0.353255	0.96597	0.824801	0.757171	0.853858	0.783845	0.918005
Q8NB16	MLKL_HUMAN	MLKL	Mixed lineage kinase domain-like protein	338962	325002	300765	297872	0.0051481	0.0183121	0.608589	0.015215	0.00972972	0.130171	0.0853806	0.99381	1.04295	1.127	1.13794	1.08058	1.09108	1.00971
Q9H2H9	S38A1_HUMAN	SLC38A1	Sodium-coupled neutral amino acid transporter 1	273809	224041	214057	162860	5.85382e-05	0.000648039	0.0440211	0.0153197	2.92147e-05	0.928943	0.00274983	0.00771773	1.22214	1.27914	1.68125	1.04664	1.37566	1.31436
Q96DB5	RMD1_HUMAN	RMDN1	Regulator of microtubule dynamics protein 1	376454	447890	460445	419754	0.0150843	0.0414003	0.0369645	0.0154194	0.276037	0.957649	0.616814	0.348289	0.840504	0.817587	0.896844	0.972734	1.06703	1.09694
A1L390	PKHG3_HUMAN	PLEKHG3	Pleckstrin homology domain-containing family G member 3	138658	144692	174062	149330	0.017262	0.0457804	0.907245	0.0154224	0.647738	0.0494971	0.953594	0.11821	0.958301	0.796603	0.928533	0.831266	0.968937	1.16562
Q9HCD5	NCOA5_HUMAN	NCOA5	Nuclear receptor coactivator 5	520294	569530	599062	579000	0.0198421	0.0505927	0.155729	0.0154659	0.0708635	0.548936	0.962431	0.817388	0.91355	0.868515	0.898609	0.950703	0.983645	1.03465
P52732	KIF11_HUMAN	KIF11	Kinesin-like protein KIF11	372176	367828	408324	439258	4.05494e-05	0.000487257	0.965027	0.0154664	0.000151035	0.00686176	7.78289e-05	0.0611319	1.01182	0.911471	0.847282	0.900824	0.837385	0.929577
Q9UER7	DAXX_HUMAN	DAXX	Death domain-associated protein 6	113479	124403	136422	125552	0.0255606	0.0608977	0.304351	0.0154998	0.223664	0.318422	0.996305	0.420399	0.912191	0.831827	0.903847	0.9119	0.990853	1.08658
Q9NVE7	PANK4_HUMAN	PANK4	4'-phosphopantetheine phosphatase	301125	386620	414725	425916	0.00743058	0.0241202	0.0700131	0.0155408	0.00883289	0.822238	0.644719	0.987711	0.778864	0.726084	0.707006	0.932234	0.90774	0.973726
Q8NDI1	EHBP1_HUMAN	EHBP1	EH domain-binding protein 1	39314.3	51806.1	61376.9	67961.6	0.00457064	0.0167632	0.141838	0.0156071	0.00421802	0.585927	0.225812	0.872947	0.758875	0.640539	0.578478	0.844064	0.762284	0.903112
P49903	SPS1_HUMAN	SEPHS1	Selenide, water dikinase 1	580137	648375	724312	734179	0.00700795	0.0230953	0.300577	0.0156348	0.00955157	0.324518	0.217025	0.991765	0.894755	0.800949	0.790185	0.895161	0.88313	0.98656
Q06547	GABP1_HUMAN	GABPB1	GA-binding protein subunit beta-1	129378	160820	177569	207828	0.00116356	0.00602662	0.100734	0.0156646	0.000719603	0.70896	0.0555432	0.306912	0.804489	0.728606	0.622521	0.905675	0.773809	0.8544
Q9UKX5	ITA11_HUMAN	ITGA11	Integrin alpha-11	162568	178840	188688	190719	0.00798333	0.0255258	0.146524	0.0157106	0.00977487	0.576287	0.425835	0.992632	0.909014	0.861567	0.852393	0.947804	0.937712	0.989353
P61086	UBE2K_HUMAN	UBE2K	Ubiquitin-conjugating enzyme E2 K	1.15409e+06	1.37126e+06	1.53293e+06	1.66495e+06	0.00293813	0.0120534	0.180561	0.0157348	0.00243714	0.50087	0.106398	0.70538	0.841627	0.752862	0.693164	0.894531	0.8236	0.920706
O75815	BCAR3_HUMAN	BCAR3	Breast cancer anti-estrogen resistance protein 3	464411	386041	353813	271587	9.91444e-05	0.000977147	0.12225	0.0157469	5.63795e-05	0.642642	0.00227884	0.0177403	1.20301	1.31259	1.70999	1.09109	1.42143	1.30276
Q12906	ILF3_HUMAN	ILF3	Interleukin enhancer-binding factor 3	3.6579e+06	3.9288e+06	4.36076e+06	4.39559e+06	0.00634842	0.0213412	0.535898	0.0157565	0.0114964	0.164135	0.123093	0.997805	0.931049	0.838821	0.832175	0.900943	0.893804	0.992076
Q14331	FRG1_HUMAN	FRG1	Protein FRG1	427564	466273	463195	460919	0.00621604	0.0209815	0.00907102	0.0157749	0.0227876	0.988442	0.950997	0.996552	0.916982	0.923077	0.927635	1.00665	1.01162	1.00494
Q9H4I9	EMRE_HUMAN	SMDT1	Essential MCU regulator, mitochondrial	34948.4	43921.7	104987	58804.2	0.0143965	0.0399103	0.983815	0.0157788	0.598129	0.0294325	0.798404	0.138535	0.795698	0.332883	0.594319	0.418354	0.746915	1.78537
P31948	STIP1_HUMAN	STIP1	Stress-induced-phosphoprotein 1	5.99538e+06	6.97833e+06	7.2086e+06	7.57652e+06	0.00382881	0.0146524	0.0521431	0.0158337	0.00317488	0.901657	0.407857	0.78955	0.859143	0.831698	0.791311	0.968056	0.921047	0.951439
O75027	ABCB7_HUMAN	ABCB7	Iron-sulfur clusters transporter ABCB7, mitochondrial	458109	392269	384216	374205	0.00554384	0.0193551	0.0327454	0.015903	0.00622318	0.975299	0.778608	0.9478	1.16784	1.19232	1.22422	1.02096	1.04827	1.02675
P55010	IF5_HUMAN	EIF5	Eukaryotic translation initiation factor 5	2.07952e+06	2.21886e+06	2.4587e+06	2.0719e+06	0.0103322	0.0310134	0.503073	0.0159551	0.999996	0.181676	0.491171	0.0153679	0.937201	0.84578	1.00367	0.902453	1.07093	1.18669
P62875	RPAB5_HUMAN	POLR2L	DNA-directed RNA polymerases I, II, and III subunit RPABC5	115466	139681	229759	155710	0.0230671	0.05638	0.69133	0.0160074	0.483062	0.108187	0.982944	0.192587	0.826642	0.502552	0.741546	0.607944	0.897057	1.47556
P08758	ANXA5_HUMAN	ANXA5	Annexin A5	1.45193e+07	1.7608e+07	1.73514e+07	1.72828e+07	0.00601864	0.0204963	0.00899476	0.0162908	0.0198357	0.98581	0.967916	0.999463	0.824586	0.836779	0.840103	1.01479	1.01882	1.00397
O14639	ABLM1_HUMAN	ABLIM1	Actin-binding LIM protein 1	359912	429325	419541	446137	0.00149377	0.00727511	0.00640046	0.0163075	0.00139806	0.948314	0.803301	0.499945	0.838321	0.857871	0.806729	1.02332	0.962315	0.940385
Q9BQ52	RNZ2_HUMAN	ELAC2	Zinc phosphodiesterase ELAC protein 2	629369	660369	698208	732542	0.00112685	0.0058919	0.381323	0.0163443	0.000985028	0.26202	0.0166008	0.385659	0.953057	0.901407	0.859158	0.945806	0.901477	0.95313
Q86WJ1	CHD1L_HUMAN	CHD1L	Chromodomain-helicase-DNA-binding protein 1-like	197198	205532	230522	277469	1.75206e-05	0.000266192	0.769075	0.0163796	2.0336e-05	0.0877022	7.38222e-05	0.00445632	0.95945	0.855442	0.710702	0.891596	0.740739	0.830801
Q8IZP0	ABI1_HUMAN	ABI1	Abl interactor 1	311723	362115	365644	366106	0.00838038	0.026532	0.0244193	0.0163942	0.0163049	0.995632	0.995453	1	0.860841	0.852531	0.851456	0.990347	0.989098	0.998739
Q9NY27	PP4R2_HUMAN	PPP4R2	Serine/threonine-protein phosphatase 4 regulatory subunit 2	627558	708264	730029	800898	0.000706516	0.00416693	0.052633	0.0163985	0.000382448	0.907031	0.0534262	0.161902	0.88605	0.859634	0.783567	0.970186	0.884338	0.911513
Q96AE7	TTC17_HUMAN	TTC17	Tetratricopeptide repeat protein 17	98108	121744	122767	103894	0.00726349	0.0237293	0.0213896	0.0164007	0.773601	0.998689	0.111317	0.0865726	0.805853	0.799142	0.944309	0.991672	1.17181	1.18165
P11766	ADHX_HUMAN	ADH5	Alcohol dehydrogenase class-3	2.14511e+06	2.43459e+06	2.47716e+06	2.84618e+06	0.000122527	0.00114347	0.0326022	0.0164124	5.89785e-05	0.978643	0.00909073	0.018034	0.881098	0.865955	0.753681	0.982813	0.855388	0.870346
Q13838	DX39B_HUMAN	DDX39B	Spliceosome RNA helicase DDX39B	5.93469e+06	6.83852e+06	6.77045e+06	6.78193e+06	0.00565876	0.019601	0.00976831	0.0164134	0.0144665	0.990433	0.995774	0.999858	0.867832	0.876558	0.875074	1.01005	1.00834	0.998307
P52701	MSH6_HUMAN	MSH6	DNA mismatch repair protein Msh6	7.37986e+06	6.77234e+06	6.83089e+06	7.51215e+06	0.000601443	0.00368733	0.00822609	0.0164331	0.839809	0.977941	0.00200722	0.00390842	1.08971	1.08037	0.98239	0.991429	0.901518	0.909312
P63165	SUMO1_HUMAN	SUMO1	Small ubiquitin-related modifier 1	2.50792e+06	2.66831e+06	2.90948e+06	2.76295e+06	0.0225969	0.0555591	0.510025	0.0164431	0.140414	0.18302	0.789868	0.606948	0.93989	0.861984	0.907699	0.917112	0.96575	1.05303
Q13555	KCC2G_HUMAN	CAMK2G	Calcium/calmodulin-dependent protein kinase type II subunit gamma	170731	206031	226298	209777	0.0219629	0.0545031	0.135489	0.0164561	0.0915804	0.620201	0.994946	0.756536	0.828666	0.754452	0.813871	0.910443	0.982147	1.07876
Q96C57	CSTOS_HUMAN	CUSTOS	Protein CUSTOS	224441	259352	253584	251579	0.00485362	0.0175575	0.00530754	0.0165275	0.0250234	0.912403	0.810214	0.995081	0.865392	0.885076	0.892131	1.02275	1.0309	1.00797
Q05048	CSTF1_HUMAN	CSTF1	Cleavage stimulation factor subunit 1	653116	741562	771981	777544	0.00971353	0.029611	0.0783185	0.0165459	0.0133766	0.807125	0.742759	0.999323	0.88073	0.846026	0.839973	0.960596	0.953724	0.992846
P80217	IN35_HUMAN	IFI35	Interferon-induced 35 kDa protein	52164.5	67502.2	68672	61821.9	0.0135669	0.0380898	0.0243157	0.016705	0.178828	0.996337	0.647552	0.523569	0.772783	0.759619	0.843787	0.982966	1.09188	1.1108
Q99584	S10AD_HUMAN	S100A13	Protein S100-A13	2.10347e+06	2.49814e+06	2.46427e+06	2.66986e+06	0.00110631	0.00584927	0.0089661	0.0167226	0.000788119	0.983693	0.492678	0.315441	0.842015	0.853585	0.787857	1.01374	0.935681	0.922998
Q9NQ50	RM40_HUMAN	MRPL40	39S ribosomal protein L40, mitochondrial	517551	555976	563351	517905	0.00453057	0.0166255	0.0421102	0.0167914	0.999988	0.951193	0.0445028	0.0177558	0.930888	0.9187	0.999316	0.986907	1.07351	1.08775
P05556	ITB1_HUMAN	ITGB1	Integrin beta-1	2.86936e+06	3.0659e+06	3.3592e+06	3.2337e+06	0.01879	0.0487759	0.500934	0.0168127	0.0755808	0.191335	0.586595	0.822123	0.935897	0.854182	0.887331	0.912687	0.948107	1.03881
Q15274	NADC_HUMAN	QPRT	Nicotinate-nucleotide pyrophosphorylase [carboxylating]	231535	264144	288440	308506	0.00326561	0.0130093	0.179814	0.0168151	0.00270421	0.523679	0.118312	0.719059	0.876547	0.802713	0.750503	0.915767	0.856204	0.934958
Q14012	KCC1A_HUMAN	CAMK1	Calcium/calmodulin-dependent protein kinase type 1	35751.5	69882.5	71133.1	71955.6	0.00937475	0.0288444	0.0209159	0.016829	0.0247059	0.999279	0.999675	0.996085	0.511594	0.5026	0.496855	0.98242	0.97119	0.988569
P09874	PARP1_HUMAN	PARP1	Poly [ADP-ribose] polymerase 1	2.4777e+06	2.89914e+06	2.81146e+06	3.01245e+06	0.000721783	0.00424401	0.00380546	0.0169436	0.000593488	0.823953	0.675971	0.242111	0.854633	0.881286	0.822489	1.03119	0.962388	0.933283
Q5JWF2	GNAS1_HUMAN	GNAS	Guanine nucleotide-binding protein G(s) subunit alpha isoforms XLas	848938	773756	784676	708233	3.04048e-05	0.000396342	0.00559447	0.0169791	1.44609e-05	0.917692	0.00810137	0.00272083	1.09716	1.0819	1.19867	0.986084	1.09252	1.10793
Q9H299	SH3L3_HUMAN	SH3BGRL3	SH3 domain-binding glutamic acid-rich-like protein 3	1.34706e+06	1.84271e+06	1.94488e+06	2.14643e+06	0.00354778	0.0138906	0.0355844	0.0170616	0.00289503	0.973994	0.495996	0.737105	0.731019	0.692616	0.627581	0.947466	0.858502	0.906103
Q9NVH2	INT7_HUMAN	INTS7	Integrator complex subunit 7	259843	270927	298904	305960	0.00367396	0.0142328	0.711019	0.0171787	0.00653621	0.109222	0.0426179	0.943564	0.959088	0.86932	0.849273	0.906403	0.885501	0.976939
Q9HD26	GOPC_HUMAN	GOPC	Golgi-associated PDZ and coiled-coil motif-containing protein	283223	363993	348322	395081	0.000607239	0.00371597	0.004239	0.0172003	0.000445605	0.849813	0.532407	0.181165	0.7781	0.813107	0.716873	1.04499	0.921312	0.881646
Q13561	DCTN2_HUMAN	DCTN2	Dynactin subunit 2	1.3172e+06	1.69687e+06	1.70803e+06	1.49547e+06	0.0107397	0.0318719	0.0182196	0.0172291	0.335108	0.999988	0.327759	0.313885	0.776249	0.771178	0.880792	0.993468	1.13468	1.14214
Q96AQ6	PBIP1_HUMAN	PBXIP1	Pre-B-cell leukemia transcription factor-interacting protein 1	135008	147738	168722	219476	2.60771e-05	0.000356416	0.49088	0.0172483	2.30123e-05	0.201106	0.000169662	0.00499871	0.913836	0.80018	0.61514	0.875627	0.67314	0.768752
Q13608	PEX6_HUMAN	PEX6	Peroxisome assembly factor 2	45954.1	71451.7	81499.7	69172.7	0.020201	0.0513493	0.07539	0.017257	0.0892189	0.830063	0.99962	0.779464	0.643149	0.563856	0.664339	0.87671	1.03295	1.17821
P06737	PYGL_HUMAN	PYGL	Glycogen phosphorylase, liver form	980640	1.07296e+06	1.10353e+06	1.19694e+06	0.000576901	0.00357668	0.0727796	0.0172862	0.000311669	0.840392	0.030436	0.124484	0.91396	0.888641	0.819291	0.972298	0.896419	0.92196
Q4KMQ1	TPRN_HUMAN	TPRN	Taperin	68445.8	84037.6	81091.8	67768.9	0.000913428	0.00506022	0.00485263	0.017298	0.997751	0.882628	0.00356021	0.0125851	0.814466	0.844052	1.00999	1.03633	1.24006	1.19659
P52292	IMA1_HUMAN	KPNA2	Importin subunit alpha-1	3.23711e+06	3.00808e+06	3.01324e+06	2.95069e+06	0.0030688	0.0124657	0.0148424	0.0173203	0.00296723	0.99974	0.787896	0.740452	1.07614	1.0743	1.09707	0.998287	1.01945	1.0212
Q9ULX6	AKP8L_HUMAN	AKAP8L	A-kinase anchor protein 8-like	278673	298231	307675	305793	0.0143154	0.0397461	0.124713	0.017323	0.0259572	0.66715	0.794999	0.995435	0.934419	0.905738	0.911311	0.969306	0.975271	1.00615
P41229	KDM5C_HUMAN	KDM5C	Lysine-specific demethylase 5C	28489.2	39831.4	47468.1	42075.5	0.0218995	0.0544521	0.119592	0.0173522	0.0833087	0.682609	0.996127	0.802299	0.715244	0.600175	0.677098	0.839119	0.946667	1.12817
Q15814	TBCC_HUMAN	TBCC	Tubulin-specific chaperone C	125318	193461	177354	210596	0.00112844	0.00589552	0.00451404	0.0173735	0.00106354	0.863709	0.820701	0.391942	0.647769	0.706601	0.595066	1.09082	0.91864	0.842154
P16152	CBR1_HUMAN	CBR1	Carbonyl reductase [NADPH] 1	1.48084e+06	1.5713e+06	1.85983e+06	1.81614e+06	0.00947253	0.0290505	0.814598	0.0173965	0.0350654	0.080146	0.154425	0.97729	0.942427	0.796223	0.815378	0.844864	0.86519	1.02406
P48735	IDHP_HUMAN	IDH2	Isocitrate dehydrogenase [NADP], mitochondrial	1.63046e+06	1.51309e+06	1.51079e+06	1.42431e+06	0.000367478	0.00257412	0.0189985	0.0174013	0.000184308	0.999952	0.0631562	0.0687872	1.07757	1.07921	1.14474	1.00152	1.06233	1.06072
Q9H7C9	AAMDC_HUMAN	AAMDC	Mth938 domain-containing protein	76040.4	101167	102378	131395	0.000223807	0.00178537	0.0184835	0.0174323	0.000108074	0.999986	0.0342556	0.0363097	0.751632	0.742741	0.578714	0.988171	0.769943	0.77916
Q9Y3Z3	SAMH1_HUMAN	SAMHD1	Deoxynucleoside triphosphate triphosphohydrolase SAMHD1	788093	866021	847407	702785	1.01614e-06	3.02509e-05	0.00263097	0.0174333	0.00051499	0.69807	1.30178e-06	4.32032e-06	0.910017	0.930006	1.12139	1.02197	1.23227	1.20578
O14818	PSA7_HUMAN	PSMA7	Proteasome subunit alpha type-7	3.83609e+06	4.28366e+06	4.57076e+06	4.58458e+06	0.011429	0.0334668	0.16591	0.0175534	0.0165606	0.567356	0.548218	0.999986	0.895517	0.839267	0.836737	0.937187	0.934361	0.996985
Q99496	RING2_HUMAN	RNF2	E3 ubiquitin-protein ligase RING2	39854.8	59166.4	65225.5	59559.6	0.0170831	0.0454152	0.0564034	0.0175583	0.0578152	0.906584	0.999999	0.901264	0.673604	0.61103	0.669157	0.907106	0.993398	1.09513
Q9UKG1	DP13A_HUMAN	APPL1	DCC-interacting protein 13-alpha	351286	393756	391410	423805	0.000451901	0.00299861	0.0121391	0.0176017	0.000241161	0.996434	0.130934	0.0924053	0.892141	0.897489	0.828885	1.00599	0.929096	0.92356
Q15291	RBBP5_HUMAN	RBBP5	Retinoblastoma-binding protein 5	321733	355485	372141	370407	0.0134434	0.037849	0.118375	0.0176351	0.0224065	0.69152	0.76768	0.999037	0.905054	0.864547	0.868594	0.955244	0.959716	1.00468
Q8IVT5	KSR1_HUMAN	KSR1	Kinase suppressor of Ras 1	34703.7	32017.1	27867.7	30144.5	0.0235306	0.0573216	0.610571	0.0176539	0.168062	0.148316	0.757325	0.564473	1.08391	1.2453	1.15125	1.1489	1.06212	0.92447
Q8N9R8	SCAI_HUMAN	SCAI	Protein SCAI	91142.7	94496.4	108127	100868	0.017646	0.0465559	0.896726	0.017695	0.19844	0.059464	0.503057	0.50388	0.96451	0.842919	0.903583	0.873935	0.936832	1.07197
O00115	DNS2A_HUMAN	DNASE2	Deoxyribonuclease-2-alpha	423378	441477	480598	460326	0.0210932	0.0530133	0.679308	0.0177176	0.140224	0.123068	0.624672	0.632296	0.959004	0.88094	0.919734	0.9186	0.959052	1.04404
Q5HYK3	COQ5_HUMAN	COQ5	2-methoxy-6-polyprenyl-1,4-benzoquinol methylase, mitochondrial	47644.1	51778.1	65656.6	62884.4	0.0100968	0.030498	0.805785	0.0177959	0.0372794	0.0843693	0.167764	0.973522	0.920158	0.725656	0.757646	0.788621	0.823387	1.04408
Q9NW38	FANCL_HUMAN	FANCL	E3 ubiquitin-protein ligase FANCL	33012.3	14478.6	16823.1	17115.7	0.00757252	0.0244643	0.00954885	0.0178278	0.0389356	0.98365	0.851516	0.969053	2.28008	1.96232	1.92877	0.86064	0.845924	0.982902
Q6AZY7	SCAR3_HUMAN	SCARA3	Scavenger receptor class A member 3	38947.5	41000.8	75304.3	77161.8	0.00201676	0.00909813	0.999854	0.0178599	0.0124966	0.0157215	0.0110049	0.996831	0.949919	0.517201	0.504751	0.544469	0.531362	0.975928
O96011	PX11B_HUMAN	PEX11B	Peroxisomal membrane protein 11B	107856	86983	90591.3	90800.8	0.00397544	0.0150221	0.0040235	0.0178766	0.0193686	0.825006	0.802246	0.999964	1.23997	1.19058	1.18784	0.960169	0.957954	0.997694
Q9NPD8	UBE2T_HUMAN	UBE2T	Ubiquitin-conjugating enzyme E2 T	440897	476907	543584	530303	0.0129593	0.0368054	0.524252	0.0178786	0.0324118	0.189468	0.310697	0.985843	0.924494	0.811094	0.831406	0.877338	0.89931	1.02504
Q14974	IMB1_HUMAN	KPNB1	Importin subunit beta-1	3.60513e+06	4.17904e+06	5.54331e+06	4.79396e+06	0.0194379	0.0499282	0.761196	0.0179101	0.138046	0.0978401	0.534577	0.641592	0.862669	0.650357	0.752015	0.75389	0.871731	1.15631
Q9UK58	CCNL1_HUMAN	CCNL1	Cyclin-L1	121897	163818	230697	194638	0.0218435	0.0543538	0.414126	0.0179345	0.0837479	0.257227	0.715725	0.810231	0.744098	0.528385	0.626274	0.710102	0.841655	1.18526
P63241	IF5A1_HUMAN	EIF5A	Eukaryotic translation initiation factor 5A-1	1.29706e+07	1.43014e+07	1.89424e+07	2.04803e+07	0.00228007	0.00997284	0.897788	0.0179745	0.00504275	0.0600952	0.0168201	0.882847	0.906945	0.68474	0.633321	0.754996	0.698301	0.924907
Q15633	TRBP2_HUMAN	TARBP2	RISC-loading complex subunit TARBP2	76276.9	109739	129940	107573	0.0237292	0.057678	0.100971	0.0180175	0.125462	0.752719	0.999121	0.677986	0.695076	0.587016	0.709073	0.844535	1.02014	1.20793
P08727	K1C19_HUMAN	KRT19	Keratin, type I cytoskeletal 19	4.43812e+06	4.86647e+06	5.14225e+06	5.94419e+06	0.000119449	0.00112456	0.177891	0.0180432	7.25313e-05	0.550588	0.00208677	0.0213451	0.911978	0.863068	0.746631	0.946369	0.818694	0.865089
Q96FX8	PERP_HUMAN	PERP	p53 apoptosis effector related to PMP-22	31173	42080.3	59499.3	59938	0.00904007	0.0281687	0.549074	0.0182627	0.0177631	0.180534	0.176166	0.999998	0.740796	0.523921	0.520087	0.707241	0.702065	0.992681
Q99755	PI51A_HUMAN	PIP5K1A	Phosphatidylinositol 4-phosphate 5-kinase type-1 alpha	2.24101e+06	2.09023e+06	1.96923e+06	1.47681e+06	4.496e-07	1.66096e-05	0.262618	0.0183079	4.34219e-07	0.412763	3.26131e-06	2.22912e-05	1.07214	1.13801	1.51747	1.06144	1.41537	1.33344
Q08379	GOGA2_HUMAN	GOLGA2	Golgin subfamily A member 2	661950	748221	758392	723949	0.0169037	0.0450653	0.0342918	0.0183505	0.142226	0.983639	0.833578	0.638806	0.884699	0.872834	0.91436	0.986589	1.03353	1.04758
Q9UIM3	FKBPL_HUMAN	FKBPL	FK506-binding protein-like	32780.9	41179	61281.9	53738	0.0178529	0.0469144	0.713517	0.0183569	0.0900751	0.115378	0.438664	0.79488	0.796057	0.534919	0.610012	0.67196	0.766293	1.14038
Q9BPX3	CND3_HUMAN	NCAPG	Condensin complex subunit 3	367741	373622	411876	467134	2.51212e-05	0.000348062	0.966451	0.0183617	3.98122e-05	0.0410076	7.44041e-05	0.00969354	0.984261	0.892844	0.787229	0.907121	0.799818	0.88171
P31321	KAP1_HUMAN	PRKAR1B	cAMP-dependent protein kinase type I-beta regulatory subunit	55507.6	63761.7	76193.2	71706.6	0.0192259	0.0495376	0.464779	0.0183816	0.0631793	0.228091	0.563651	0.891411	0.870548	0.728512	0.774094	0.836843	0.889203	1.06257
Q9BUR5	MIC26_HUMAN	APOO	MICOS complex subunit MIC26	872111	824445	739245	712423	0.0034571	0.0136081	0.616147	0.0185341	0.00491922	0.15266	0.0425303	0.869482	1.05782	1.17973	1.22415	1.11525	1.15724	1.03765
Q8IYD1	ERF3B_HUMAN	GSPT2	Eukaryotic peptide chain release factor GTP-binding subunit ERF3B	260706	508033	807604	888598	0.0105117	0.0313489	0.217432	0.0186357	0.0141624	0.486624	0.403834	0.998552	0.513167	0.322814	0.29339	0.629062	0.571724	0.908852
Q9GZT8	NIF3L_HUMAN	NIF3L1	NIF3-like protein 1	269460	311649	313372	317676	0.00737641	0.0239797	0.0240448	0.0186555	0.0110705	0.998855	0.969756	0.990311	0.864629	0.859873	0.848223	0.994499	0.981026	0.986452
Q96KQ7	EHMT2_HUMAN	EHMT2	Histone-lysine N-methyltransferase EHMT2	282772	288402	317675	319433	0.00420361	0.0157003	0.93651	0.0187162	0.0132383	0.0513916	0.0364777	0.997111	0.980482	0.890132	0.885234	0.907851	0.902856	0.994498
Q92564	DCNL4_HUMAN	DCUN1D4	DCN1-like protein 4	50648.2	90631.2	101662	85515.5	0.0189283	0.049	0.0507982	0.0187859	0.0878765	0.939104	0.987883	0.809109	0.558839	0.498204	0.592269	0.891497	1.05982	1.18881
O14976	GAK_HUMAN	GAK	Cyclin-G-associated kinase	323386	337343	361210	371300	0.00341164	0.0134451	0.557635	0.0188155	0.00440482	0.181126	0.0452829	0.836463	0.958627	0.895286	0.870956	0.933925	0.908545	0.972825
Q8N1B4	VPS52_HUMAN	VPS52	Vacuolar protein sorting-associated protein 52 homolog	158694	141984	144428	151161	0.00549994	0.0192509	0.00587314	0.0189148	0.299748	0.905905	0.140883	0.37547	1.11769	1.09878	1.04983	0.983077	0.939287	0.955457
Q9Y6R9	CCD61_HUMAN	CCDC61	Centrosomal protein CCDC61	34437.6	41179.9	62041.9	50253	0.0169145	0.0450759	0.912915	0.0189169	0.159813	0.0588584	0.405002	0.606022	0.836271	0.55507	0.685284	0.663744	0.819452	1.23459
Q16134	ETFD_HUMAN	ETFDH	Electron transfer flavoprotein-ubiquinone oxidoreductase, mitochondrial	656052	582739	582467	524047	0.000237083	0.00184556	0.0191726	0.0189229	0.000114537	1	0.0354657	0.035931	1.12581	1.12633	1.25189	1.00047	1.112	1.11148
O14879	IFIT3_HUMAN	IFIT3	Interferon-induced protein with tetratricopeptide repeats 3	769167	734466	635761	111023	2.2041e-13	1.61854e-10	0.850471	0.0190073	9.08162e-13	0.0768725	1.06126e-12	1.7859e-12	1.04725	1.20984	6.928	1.15525	6.61544	5.72639
Q9NX55	HYPK_HUMAN	HYPK	Huntingtin-interacting protein K	62070.4	92659.3	98971.7	108223	0.00592611	0.0202616	0.0389381	0.0190102	0.00597389	0.975712	0.710923	0.908448	0.669878	0.627153	0.57354	0.93622	0.856186	0.914514
Q9Y277	VDAC3_HUMAN	VDAC3	Voltage-dependent anion-selective channel protein 3	1.46281e+06	1.55761e+06	1.6699e+06	1.51582e+06	0.0258386	0.061405	0.373232	0.0190139	0.763016	0.302927	0.893967	0.102953	0.939134	0.875986	0.965028	0.932759	1.02757	1.10165
Q9ULX9	MAFF_HUMAN	MAFF	Transcription factor MafF	54877.3	36926.1	30903.4	31783.7	0.0148895	0.0409849	0.0976769	0.0190417	0.0262314	0.78041	0.868578	0.99771	1.48614	1.77577	1.72658	1.19489	1.16179	0.972301
O75629	CREG1_HUMAN	CREG1	Protein CREG1	32493.1	245826	331419	362449	0.0199691	0.0508578	0.101855	0.0190771	0.0537861	0.767525	0.980817	0.931811	0.132179	0.0980421	0.0896487	0.741738	0.678237	0.914389
Q9BRP8	PYM1_HUMAN	PYM1	Partner of Y14 and mago	398459	447739	477672	519642	0.00167971	0.00791812	0.150638	0.0190908	0.00111003	0.630912	0.0577782	0.378589	0.889937	0.834169	0.766795	0.937335	0.861629	0.919232
Q9BY43	CHM4A_HUMAN	CHMP4A	Charged multivesicular body protein 4a	387891	426596	453944	489227	0.00177241	0.00823761	0.204145	0.019139	0.00126179	0.518516	0.0472294	0.417259	0.90927	0.854491	0.792864	0.939755	0.871979	0.927879
Q96KP4	CNDP2_HUMAN	CNDP2	Cytosolic non-specific dipeptidase	1.02123e+06	1.16105e+06	1.26858e+06	1.37471e+06	0.00249477	0.0105827	0.254299	0.0192476	0.00200493	0.439121	0.0594188	0.570727	0.879574	0.805021	0.742868	0.91524	0.844577	0.922793
Q676U5	A16L1_HUMAN	ATG16L1	Autophagy-related protein 16-1	118069	134566	133745	150352	0.000181956	0.00151264	0.0132825	0.0192946	8.76991e-05	0.996389	0.0367749	0.0253403	0.877409	0.882796	0.785284	1.00614	0.895004	0.889543
Q9BZV1	UBXN6_HUMAN	UBXN6	UBX domain-containing protein 6	135840	136448	169045	151832	0.0122489	0.035259	0.999942	0.0193323	0.309254	0.0212336	0.332532	0.370573	0.995545	0.803574	0.894673	0.807169	0.898676	1.11337
Q9UJY4	GGA2_HUMAN	GGA2	ADP-ribosylation factor-binding protein GGA2	141789	152537	190583	244030	0.000174727	0.00147293	0.792488	0.0194695	0.000207377	0.0959971	0.000859869	0.0706811	0.929543	0.743978	0.581032	0.800369	0.625073	0.780981
P35637	FUS_HUMAN	FUS	RNA-binding protein FUS	5.45075e+06	6.46078e+06	7.0305e+06	6.49648e+06	0.0276158	0.0645835	0.172832	0.0196076	0.124946	0.588776	0.996826	0.707095	0.843668	0.775302	0.839032	0.918965	0.994505	1.0822
P59998	ARPC4_HUMAN	ARPC4	Actin-related protein 2/3 complex subunit 4	2.92624e+06	3.35711e+06	3.33927e+06	3.39213e+06	0.00588022	0.0201709	0.0148876	0.019609	0.0092158	0.998538	0.992382	0.971856	0.871657	0.876312	0.862657	1.00534	0.989674	0.984417
Q8WX93	PALLD_HUMAN	PALLD	Palladin	2.75786e+06	2.8358e+06	3.14635e+06	3.03339e+06	0.0160285	0.0433112	0.889133	0.0196991	0.110624	0.0682477	0.326946	0.750275	0.972516	0.876527	0.909169	0.901299	0.934863	1.03724
P62487	RPB7_HUMAN	POLR2G	DNA-directed RNA polymerase II subunit RPB7	392728	408858	522719	510182	0.00684421	0.022662	0.979228	0.0199552	0.0359905	0.0393342	0.0702712	0.986159	0.960548	0.751318	0.769781	0.782176	0.801397	1.02457
Q5W111	SPRY7_HUMAN	SPRYD7	SPRY domain-containing protein 7	118637	144566	151460	130193	0.0190228	0.0492061	0.0716795	0.0200342	0.624509	0.881367	0.448426	0.160078	0.820638	0.783285	0.911235	0.954483	1.1104	1.16335
P14384	CBPM_HUMAN	CPM	Carboxypeptidase M	74750.5	91718.9	99052.5	114188	0.00210597	0.00939795	0.100375	0.0200527	0.00134759	0.787272	0.107673	0.424352	0.814995	0.754655	0.654625	0.925963	0.803226	0.867449
Q13867	BLMH_HUMAN	BLMH	Bleomycin hydrolase	882929	1.04702e+06	1.06996e+06	1.20225e+06	0.00104026	0.00558335	0.0369445	0.0200718	0.000572081	0.984724	0.116755	0.202472	0.84328	0.825195	0.734398	0.978554	0.870883	0.889969
Q9UHB9	SRP68_HUMAN	SRP68	Signal recognition particle subunit SRP68	1.02305e+06	936915	922850	915602	0.00968244	0.0295435	0.0478278	0.0200787	0.0129062	0.958164	0.875143	0.994062	1.09193	1.10857	1.11735	1.01524	1.02328	1.00792
P49747	COMP_HUMAN	COMP	Cartilage oligomeric matrix protein	44469.1	37307.5	23846.1	18540.2	0.00107121	0.0056956	0.737215	0.020091	0.00136255	0.117132	0.00771717	0.42729	1.19196	1.86484	2.39853	1.56451	2.01225	1.28619
Q12872	SFSWA_HUMAN	SFSWAP	Splicing factor, suppressor of white-apricot homolog	159126	193831	191530	178913	0.0106618	0.0317406	0.0133823	0.0201082	0.201838	0.995336	0.412469	0.53878	0.820953	0.830815	0.889404	1.01201	1.08338	1.07052
Q7Z6Z7	HUWE1_HUMAN	HUWE1	E3 ubiquitin-protein ligase HUWE1	511503	533229	565817	668117	4.55252e-06	9.83254e-05	0.517757	0.0201535	4.48172e-06	0.21384	2.48937e-05	0.000476034	0.959255	0.904007	0.765589	0.942405	0.798108	0.846884
Q9Y2V7	COG6_HUMAN	COG6	Conserved oligomeric Golgi complex subunit 6	96115.3	87517.6	79676.2	90222.1	0.0294244	0.0677345	0.340414	0.0201587	0.662903	0.348449	0.931405	0.145021	1.09824	1.20632	1.06532	1.09842	0.970025	0.883112
O43488	ARK72_HUMAN	AKR7A2	Aflatoxin B1 aldehyde reductase member 2	847259	934305	1.01721e+06	1.04707e+06	0.00686909	0.0226989	0.284145	0.0201925	0.00752774	0.41296	0.187429	0.940587	0.906834	0.832923	0.809171	0.918496	0.892304	0.971484
Q9HC07	TM165_HUMAN	TMEM165	Transmembrane protein 165	432846	604690	678641	586143	0.0282756	0.0656848	0.134324	0.0202897	0.151596	0.69265	0.999835	0.648832	0.715815	0.637813	0.738466	0.891031	1.03164	1.15781
Q7Z739	YTHD3_HUMAN	YTHDF3	YTH domain-containing family protein 3	313918	350640	358812	381975	0.00183366	0.00844505	0.0535725	0.0202995	0.00110814	0.942901	0.161197	0.361365	0.895271	0.874883	0.821828	0.977226	0.917966	0.939358
Q96JB1	DYH8_HUMAN	DNAH8	Dynein axonemal heavy chain 8	2.31235e+06	1.86471e+06	1.61256e+06	1.38504e+06	0.00239668	0.0103211	0.203735	0.0203241	0.00176062	0.538732	0.0671167	0.508204	1.24006	1.43396	1.66952	1.15636	1.34632	1.16427
Q86YT6	MIB1_HUMAN	MIB1	E3 ubiquitin-protein ligase MIB1	49440.3	71325.1	75607.1	81575.5	0.00730433	0.0237922	0.0441003	0.0203388	0.00788389	0.96972	0.760217	0.946832	0.693169	0.653911	0.606068	0.943365	0.874344	0.926836
P52597	HNRPF_HUMAN	HNRNPF	Heterogeneous nuclear ribonucleoprotein F	6.25901e+06	7.32313e+06	9.11799e+06	8.0212e+06	0.0260938	0.0618335	0.619833	0.0205253	0.154507	0.165655	0.71886	0.645669	0.854691	0.686446	0.780309	0.803151	0.912972	1.13674
Q92643	GPI8_HUMAN	PIGK	GPI-anchor transamidase	238674	301727	319401	301720	0.019838	0.0505927	0.0665721	0.0205302	0.0607203	0.903769	0.999941	0.922629	0.791026	0.747257	0.791045	0.944668	1.00002	1.0586
Q9UMX0	UBQL1_HUMAN	UBQLN1	Ubiquilin-1	30246.4	54755.2	68364	52571.8	0.0282663	0.0656848	0.13313	0.0205713	0.143262	0.700323	0.999964	0.674029	0.552393	0.442431	0.575335	0.800936	1.04153	1.30039
Q13363	CTBP1_HUMAN	CTBP1	C-terminal-binding protein 1	294811	335260	355585	345260	0.0220298	0.05458	0.139386	0.0206832	0.0550096	0.685707	0.942872	0.941578	0.879351	0.829088	0.853882	0.942841	0.971037	1.02991
Q9BVV7	TIM21_HUMAN	TIMM21	Mitochondrial import inner membrane translocase subunit Tim21	489241	434705	432277	441589	0.0144874	0.0401267	0.0269482	0.0207581	0.0584329	0.998754	0.969224	0.931793	1.12545	1.13178	1.10791	1.00562	0.984412	0.978914
Q9UKM7	MA1B1_HUMAN	MAN1B1	Endoplasmic reticulum mannosyl-oligosaccharide 1,2-alpha-mannosidase	155811	210514	239739	241647	0.0119211	0.0346402	0.132343	0.0208049	0.0151258	0.706092	0.60065	0.997743	0.740148	0.64992	0.64479	0.878094	0.871163	0.992106
O95881	TXD12_HUMAN	TXNDC12	Thioredoxin domain-containing protein 12	196720	280866	299524	273900	0.0194662	0.0499814	0.0499058	0.0208223	0.0767711	0.957253	0.994086	0.873662	0.700404	0.656774	0.718219	0.937706	1.02543	1.09356
P55209	NP1L1_HUMAN	NAP1L1	Nucleosome assembly protein 1-like 1	1.9792e+06	3.25495e+06	3.1635e+06	3.47184e+06	0.00551249	0.019276	0.0176601	0.020943	0.0069636	0.999651	0.94919	0.920133	0.60806	0.625638	0.570073	1.02891	0.937528	0.911187
Q9P2E5	CHPF2_HUMAN	CHPF2	Chondroitin sulfate glucuronyltransferase	103874	115449	125182	108458	0.0237429	0.0576897	0.250954	0.0209434	0.855014	0.469772	0.651838	0.0829706	0.899737	0.829783	0.957735	0.922251	1.06446	1.1542
Q9NR46	SHLB2_HUMAN	SH3GLB2	Endophilin-B2	750484	828254	857195	867497	0.010692	0.0318016	0.0957094	0.020945	0.0127013	0.814552	0.657763	0.991462	0.906104	0.875511	0.865114	0.966237	0.954762	0.988124
Q8IV50	LYSM2_HUMAN	LYSMD2	LysM and putative peptidoglycan-binding domain-containing protein 2	290264	364630	372149	366913	0.0123885	0.0355825	0.0327466	0.0210718	0.0265436	0.994091	0.999344	0.999136	0.796052	0.779967	0.791098	0.979794	0.993776	1.01427
P31751	AKT2_HUMAN	AKT2	RAC-beta serine/threonine-protein kinase	214727	226567	240472	271446	6.79061e-05	0.000727766	0.391981	0.0210756	5.22574e-05	0.311477	0.000576997	0.0120255	0.947742	0.892938	0.791047	0.942174	0.834665	0.885892
Q13188	STK3_HUMAN	STK3	Serine/threonine-protein kinase 3	165184	206684	227438	196783	0.0299321	0.0686164	0.126009	0.0211235	0.269183	0.728115	0.958606	0.446203	0.799207	0.726278	0.839422	0.908749	1.05032	1.15578
Q9Y2L1	RRP44_HUMAN	DIS3	Exosome complex exonuclease RRP44	624467	569148	571986	602003	0.00958181	0.0293041	0.0158746	0.0211414	0.505873	0.998357	0.179474	0.229831	1.0972	1.09175	1.03731	0.99504	0.945424	0.950137
Q13438	OS9_HUMAN	OS9	Protein OS-9	201293	240827	248648	211964	0.0136999	0.0384145	0.0510152	0.0213188	0.803992	0.957419	0.222326	0.100782	0.835838	0.80955	0.949653	0.968548	1.13617	1.17306
Q9P2I0	CPSF2_HUMAN	CPSF2	Cleavage and polyadenylation specificity factor subunit 2	508046	550287	561015	543101	0.0245039	0.0589538	0.069623	0.0213423	0.144332	0.902209	0.970127	0.68345	0.923239	0.905584	0.935455	0.980877	1.01323	1.03299
P06576	ATPB_HUMAN	ATP5F1B	ATP synthase subunit beta, mitochondrial	2.58176e+07	2.90167e+07	3.56125e+07	2.74991e+07	0.0251812	0.0602544	0.662185	0.0213425	0.88741	0.153016	0.970419	0.0742975	0.889748	0.724958	0.938851	0.814791	1.05519	1.29504
P51003	PAPOA_HUMAN	PAPOLA	Poly(A) polymerase alpha	254001	266590	279426	353615	2.456e-07	1.05401e-05	0.341595	0.021377	2.66663e-07	0.362828	1.51496e-06	1.04975e-05	0.952779	0.909012	0.718299	0.954063	0.753899	0.790198
P78559	MAP1A_HUMAN	MAP1A	Microtubule-associated protein 1A	52062	63052.6	78013.2	98981.6	0.00116036	0.00602312	0.360047	0.0214872	0.000911702	0.345624	0.0164936	0.293733	0.825693	0.66735	0.525977	0.80823	0.637013	0.788158
Q92685	ALG3_HUMAN	ALG3	Dol-P-Man:Man(5)GlcNAc(2)-PP-Dol alpha-1,3-mannosyltransferase	327333	236918	213562	191651	0.00741034	0.0240663	0.0999008	0.0215991	0.00689107	0.810423	0.443698	0.911983	1.38163	1.53273	1.70796	1.10936	1.23619	1.11433
P82933	RT09_HUMAN	MRPS9	28S ribosomal protein S9, mitochondrial	429775	446038	498063	457958	0.0269912	0.0634821	0.857766	0.0216034	0.469682	0.0845964	0.892901	0.257516	0.96354	0.862894	0.93846	0.895546	0.973971	1.08757
P00558	PGK1_HUMAN	PGK1	Phosphoglycerate kinase 1	1.27482e+07	1.36475e+07	1.57446e+07	1.66301e+07	0.00311125	0.012584	0.733042	0.0217109	0.00470238	0.127411	0.028508	0.815414	0.934107	0.809692	0.766578	0.866808	0.820653	0.946753
P43307	SSRA_HUMAN	SSR1	Translocon-associated protein subunit alpha	3.23746e+06	4.37689e+06	5.55162e+06	4.09786e+06	0.0343993	0.076239	0.227362	0.0218433	0.370272	0.520458	0.984495	0.340069	0.73967	0.583155	0.790036	0.788399	1.06809	1.35476
O75533	SF3B1_HUMAN	SF3B1	Splicing factor 3B subunit 1	3.49205e+06	3.72334e+06	3.97621e+06	3.85689e+06	0.0260349	0.0617384	0.405058	0.0218481	0.0872237	0.309069	0.73931	0.852459	0.93788	0.878236	0.905405	0.936406	0.965374	1.03094
Q9Y653	AGRG1_HUMAN	ADGRG1	Adhesion G-protein coupled receptor G1	395214	422248	509497	576391	0.00107831	0.00572415	0.782742	0.0218627	0.00142795	0.110443	0.00701089	0.417232	0.935974	0.775694	0.685669	0.828756	0.732572	0.883942
Q68CZ2	TENS3_HUMAN	TNS3	Tensin-3	447211	470424	514542	638080	8.85258e-06	0.000163427	0.592862	0.0219657	8.88114e-06	0.188958	4.51494e-05	0.00110735	0.950655	0.869144	0.700871	0.914258	0.73725	0.806392
P12277	KCRB_HUMAN	CKB	Creatine kinase B-type	7.30937e+06	9.00594e+06	1.25048e+07	1.34273e+07	0.00543813	0.0191377	0.741979	0.0219658	0.00992817	0.125477	0.058711	0.967621	0.811616	0.584527	0.544366	0.720201	0.670718	0.931294
P62314	SMD1_HUMAN	SNRPD1	Small nuclear ribonucleoprotein Sm D1	2.05198e+06	2.85696e+06	2.97164e+06	2.52901e+06	0.0211653	0.0530731	0.0441387	0.0220101	0.22884	0.977586	0.749385	0.520437	0.718238	0.69052	0.811377	0.961409	1.12968	1.17502
P13726	TF_HUMAN	F3	Tissue factor	507481	369669	321030	129582	2.16426e-06	5.45939e-05	0.0839647	0.0221235	1.4986e-06	0.865703	3.50307e-05	0.000100687	1.3728	1.58079	3.91629	1.15151	2.85278	2.47743
O60573	IF4E2_HUMAN	EIF4E2	Eukaryotic translation initiation factor 4E type 2	212341	260197	264177	255673	0.0157132	0.0426606	0.0331593	0.0221266	0.0509386	0.995409	0.994404	0.962448	0.816076	0.803782	0.830515	0.984935	1.01769	1.03326
Q9UHB6	LIMA1_HUMAN	LIMA1	LIM domain and actin-binding protein 1	1.63246e+06	1.8412e+06	1.85507e+06	1.6716e+06	0.00840064	0.0265645	0.032503	0.0222072	0.934022	0.996158	0.0891024	0.0616407	0.886626	0.879998	0.976585	0.992525	1.10146	1.10976
Q92614	MY18A_HUMAN	MYO18A	Unconventional myosin-XVIIIa	344546	379854	391491	390641	0.0150745	0.0414003	0.0885471	0.0222872	0.023203	0.853526	0.863737	0.999995	0.907048	0.880087	0.882001	0.970276	0.972387	1.00218
P22392	NDKB_HUMAN	NME2	Nucleoside diphosphate kinase B	1.86866e+07	2.07908e+07	2.42608e+07	2.4268e+07	0.011343	0.0333034	0.583085	0.0222946	0.0221427	0.196404	0.19524	1	0.898788	0.770236	0.770008	0.856972	0.856718	0.999704
P30530	UFO_HUMAN	AXL	Tyrosine-protein kinase receptor UFO	512984	489708	619478	738911	2.41178e-05	0.000336987	0.84193	0.0223662	0.000110577	0.00532042	3.56505e-05	0.0291363	1.04753	0.82809	0.694243	0.790517	0.662743	0.838367
Q08378	GOGA3_HUMAN	GOLGA3	Golgin subfamily A member 3	356116	417025	413477	428736	0.00498263	0.017858	0.0166223	0.0223854	0.00579912	0.99816	0.928539	0.864333	0.853943	0.861271	0.830618	1.00858	0.972686	0.96441
Q9UDY2	ZO2_HUMAN	TJP2	Tight junction protein ZO-2	316788	348077	354709	284875	8.07708e-05	0.000830168	0.0622994	0.0224503	0.0310005	0.934022	0.000275912	0.00011667	0.91011	0.893095	1.11203	0.981304	1.22186	1.24514
P27105	STOM_HUMAN	STOM	Stomatin	3.33251e+06	3.78961e+06	4.56199e+06	4.22597e+06	0.0230137	0.0563116	0.635391	0.0224863	0.0919724	0.172352	0.519527	0.845469	0.879381	0.730495	0.78858	0.830693	0.896744	1.07951
Q14156	EFR3A_HUMAN	EFR3A	Protein EFR3 homolog A	122533	130754	143874	136477	0.0300044	0.068698	0.521295	0.0224901	0.149679	0.232516	0.80022	0.687491	0.937127	0.851666	0.897824	0.908805	0.95806	1.0542
O94964	SOGA1_HUMAN	SOGA1	Protein SOGA1	270573	184431	203217	214323	0.00388539	0.0148088	0.0027563	0.0226331	0.0692016	0.627855	0.293605	0.915534	1.46707	1.33145	1.26245	0.907558	0.86053	0.948182
Q14108	SCRB2_HUMAN	SCARB2	Lysosome membrane protein 2	1.40217e+06	1.14744e+06	1.18208e+06	1.08193e+06	0.00136303	0.00679404	0.00703683	0.0226856	0.00110795	0.906274	0.695416	0.33227	1.22199	1.18619	1.29598	0.970701	1.06055	1.09256
Q9NR77	PXMP2_HUMAN	PXMP2	Peroxisomal membrane protein 2	634501	551220	543695	531668	0.00814152	0.0259063	0.0401736	0.0228073	0.00915854	0.987654	0.831936	0.952275	1.15109	1.16702	1.19342	1.01384	1.03677	1.02262
Q96HR8	NAF1_HUMAN	NAF1	H/ACA ribonucleoprotein complex non-core subunit NAF1	92335.5	122748	120637	121036	0.00906748	0.0282408	0.0151935	0.0228153	0.0232827	0.995363	0.994648	0.999999	0.752237	0.765397	0.762874	1.01749	1.01414	0.996704
Q5NDL2	EOGT_HUMAN	EOGT	EGF domain-specific O-linked N-acetylglucosamine transferase	40906	74271.4	68052.6	66365	0.0084586	0.0266967	0.0109838	0.0230036	0.0307266	0.973598	0.933958	0.998299	0.550763	0.601094	0.616379	1.09138	1.11914	1.02543
P49591	SYSC_HUMAN	SARS1	Serine--tRNA ligase, cytoplasmic	2.30286e+06	2.19726e+06	2.08618e+06	2.04246e+06	0.0058496	0.0200936	0.420254	0.023054	0.00658126	0.309408	0.102979	0.887972	1.04806	1.10387	1.12749	1.05325	1.07579	1.0214
P55061	BI1_HUMAN	TMBIM6	Bax inhibitor 1	40388.9	57329.4	72395	81988.7	0.00681947	0.0226306	0.258308	0.0231793	0.00663905	0.490536	0.185829	0.888755	0.704505	0.557896	0.492615	0.791897	0.699236	0.882988
P15104	GLNA_HUMAN	GLUL	Glutamine synthetase	381725	408348	448876	525177	0.000149546	0.00132133	0.483768	0.0233227	0.000122473	0.26423	0.00115453	0.0316675	0.934805	0.850402	0.726851	0.909711	0.777543	0.854715
Q9NWM3	CUED1_HUMAN	CUEDC1	CUE domain-containing protein 1	48174.5	58264.3	66552.4	74510.6	0.00437942	0.016224	0.213923	0.0234922	0.00351626	0.567621	0.12658	0.699099	0.826828	0.723858	0.646546	0.875464	0.781959	0.893194
Q5JRA6	TGO1_HUMAN	MIA3	Transport and Golgi organization protein 1 homolog	288437	322826	342646	329626	0.0291078	0.067146	0.167977	0.0235952	0.0920074	0.660984	0.981657	0.857832	0.893476	0.841793	0.875044	0.942156	0.979371	1.0395
Q9H9G7	AGO3_HUMAN	AGO3	Protein argonaute-3	156687	201169	221888	189279	0.0308764	0.0701624	0.104199	0.0235999	0.2561	0.822837	0.937159	0.499541	0.778882	0.706152	0.82781	0.906623	1.06282	1.17228
P54652	HSP72_HUMAN	HSPA2	Heat shock-related 70 kDa protein 2	268491	296618	374804	311066	0.0343067	0.0760593	0.69869	0.0236715	0.441883	0.151993	0.968056	0.298336	0.905174	0.71635	0.863132	0.791395	0.953554	1.2049
Q12913	PTPRJ_HUMAN	PTPRJ	Receptor-type tyrosine-protein phosphatase eta	425852	463349	473593	467006	0.0211286	0.0530333	0.0772868	0.0237478	0.0507718	0.901953	0.994492	0.971043	0.919074	0.899193	0.911877	0.978369	0.99217	1.01411
Q92552	RT27_HUMAN	MRPS27	28S ribosomal protein S27, mitochondrial	873706	953497	995427	936399	0.0345321	0.076482	0.153021	0.0238389	0.306561	0.698556	0.964892	0.433651	0.916318	0.87772	0.933049	0.957877	1.01826	1.06304
P16401	H15_HUMAN	H1-5	Histone H1.5	5.60016e+07	3.86877e+07	4.07503e+07	3.48355e+07	0.0022015	0.0096998	0.0110813	0.0239632	0.00183447	0.970235	0.722169	0.470041	1.44753	1.37426	1.6076	0.949386	1.11058	1.16979
Q9BS26	ERP44_HUMAN	ERP44	Endoplasmic reticulum resident protein 44	1.76032e+06	2.22794e+06	2.04343e+06	1.86928e+06	0.000848627	0.00477732	0.000771968	0.0240314	0.54097	0.230737	0.00755372	0.233626	0.790113	0.861454	0.941711	1.09029	1.19187	1.09316
P23284	PPIB_HUMAN	PPIB	Peptidyl-prolyl cis-trans isomerase B	2.05584e+07	2.29436e+07	2.51536e+07	2.17341e+07	0.031378	0.0710168	0.355244	0.0241718	0.802375	0.382209	0.845829	0.114003	0.896042	0.817315	0.945906	0.912139	1.05565	1.15733
Q92796	DLG3_HUMAN	DLG3	Disks large homolog 3	83150.5	95073	100309	104536	0.00719763	0.0235919	0.1229	0.0241916	0.0062175	0.778706	0.351412	0.862644	0.874596	0.828944	0.795426	0.947802	0.909478	0.959566
Q12788	TBL3_HUMAN	TBL3	Transducin beta-like protein 3	979550	1.05861e+06	1.08007e+06	976420	0.00728941	0.0237787	0.0803185	0.0242244	0.99965	0.897625	0.0681048	0.0204229	0.925313	0.906929	1.00321	0.980132	1.08418	1.10616
P69905	HBA_HUMAN	HBA2	Hemoglobin subunit alpha	2.00444e+06	1.04828e+06	1.405e+06	653740	1.36977e-06	3.88687e-05	0.000196954	0.0242491	9.12559e-07	0.0537425	0.00430219	4.8377e-05	1.91211	1.42664	3.06611	0.746108	1.60352	2.14917
O14965	AURKA_HUMAN	AURKA	Aurora kinase A	380468	346078	324791	383887	0.0105068	0.0313489	0.243414	0.0243532	0.996278	0.529339	0.175955	0.0166967	1.09937	1.17142	0.991095	1.06554	0.901511	0.84606
Q96P70	IPO9_HUMAN	IPO9	Importin-9	664707	728121	739183	847231	5.17975e-05	0.000591243	0.0538862	0.0243591	2.66161e-05	0.967132	0.00200683	0.00432732	0.912907	0.899245	0.784564	0.985034	0.859413	0.87247
O75390	CISY_HUMAN	CS	Citrate synthase, mitochondrial	3.822e+06	3.50936e+06	3.52808e+06	3.26582e+06	0.000252118	0.00195111	0.0159648	0.0243672	0.000122826	0.994794	0.0462923	0.0304203	1.08909	1.08331	1.1703	0.994694	1.07457	1.0803
Q00688	FKBP3_HUMAN	FKBP3	Peptidyl-prolyl cis-trans isomerase FKBP3	1.96148e+06	2.33818e+06	2.41873e+06	2.56789e+06	0.00605149	0.020552	0.0730947	0.0244177	0.00489575	0.919318	0.437233	0.793367	0.838894	0.810954	0.76385	0.966694	0.910545	0.941916
A6NKD9	CC85C_HUMAN	CCDC85C	Coiled-coil domain-containing protein 85C	47833.7	69154.1	75677.9	93035.5	0.00339204	0.0133759	0.0675997	0.0245391	0.00225203	0.934901	0.25223	0.531269	0.691697	0.63207	0.514145	0.913795	0.743309	0.813431
P07711	CATL1_HUMAN	CTSL	Procathepsin L	980012	1.03681e+06	1.1628e+06	852642	0.000399084	0.00271353	0.691862	0.0245405	0.063224	0.159996	0.00917069	0.000228907	0.94522	0.842807	1.14938	0.891652	1.21599	1.36375
Q9H501	ESF1_HUMAN	ESF1	ESF1 homolog	173233	184018	195444	182929	0.0395264	0.08465	0.366184	0.0246588	0.460469	0.376444	0.997601	0.293589	0.941388	0.886353	0.946992	0.941539	1.00595	1.06841
P08238	HS90B_HUMAN	HSP90AB1	Heat shock protein HSP 90-beta	5.88911e+07	6.64708e+07	7.50791e+07	7.39522e+07	0.0196401	0.0502716	0.390702	0.0246748	0.0384251	0.352658	0.481693	0.993974	0.88597	0.784388	0.796341	0.885344	0.898835	1.01524
Q14151	SAFB2_HUMAN	SAFB2	Scaffold attachment factor B2	709127	761026	780661	788844	0.0120323	0.0348625	0.114576	0.0248821	0.0134075	0.809184	0.612234	0.984199	0.931804	0.908368	0.898944	0.974848	0.964735	0.989626
P50895	BCAM_HUMAN	BCAM	Basal cell adhesion molecule	32492	43548	53177	58237.1	0.00822076	0.026083	0.322009	0.02493	0.00882732	0.428195	0.187748	0.93213	0.746119	0.611015	0.557926	0.818924	0.74777	0.913113
Q13085	ACACA_HUMAN	ACACA	Acetyl-CoA carboxylase 1	1.15832e+06	1.02762e+06	1.03241e+06	1.16525e+06	0.00315754	0.0126999	0.0192903	0.0249412	0.999541	0.998812	0.0160022	0.0206904	1.12718	1.12196	0.994053	0.995367	0.881892	0.885997
P43243	MATR3_HUMAN	MATR3	Matrin-3	3.99783e+06	4.07699e+06	4.71775e+06	4.19808e+06	0.0221342	0.0547678	0.990182	0.0249602	0.755534	0.0420992	0.897187	0.135635	0.980584	0.847401	0.9523	0.86418	0.971156	1.12379
Q12768	WASC5_HUMAN	WASHC5	WASH complex subunit 5	1.79613e+06	2.00792e+06	2.0374e+06	2.08977e+06	0.00804166	0.0256686	0.0499166	0.0249632	0.00795916	0.977705	0.72369	0.912189	0.894526	0.881579	0.859489	0.985527	0.960832	0.974943
Q8IYI6	EXOC8_HUMAN	EXOC8	Exocyst complex component 8	166496	156631	150922	160455	0.0345275	0.076482	0.220884	0.0249687	0.612831	0.57536	0.845929	0.200501	1.06298	1.10319	1.03765	1.03783	0.976169	0.94059
P78371	TCPB_HUMAN	CCT2	T-complex protein 1 subunit beta	4.36434e+06	4.59627e+06	5.97293e+06	5.24508e+06	0.0203324	0.0515842	0.979065	0.0250227	0.247175	0.0492905	0.417591	0.532158	0.949541	0.730687	0.832083	0.769516	0.876301	1.13877
P98173	FAM3A_HUMAN	FAM3A	Protein FAM3A	71264.7	88163.6	88570.7	95721.9	0.00434882	0.0161287	0.0355902	0.0251153	0.00337416	0.997034	0.547209	0.663091	0.808324	0.804609	0.744497	0.995404	0.921038	0.925291
Q6NSJ0	MYORG_HUMAN	MYORG	Myogenesis-regulating glycosidase	163467	177034	205858	195351	0.0242668	0.0586611	0.668814	0.0251749	0.0906172	0.174237	0.482538	0.877703	0.923367	0.794076	0.836788	0.859979	0.906236	1.05379
Q9BVC5	ASHWN_HUMAN	C2orf49	Ashwin	213900	238980	293318	330690	0.00259802	0.0109087	0.642941	0.0252183	0.00304599	0.186923	0.0240011	0.626469	0.895052	0.729241	0.646829	0.814746	0.722672	0.88699
Q9Y266	NUDC_HUMAN	NUDC	Nuclear migration protein nudC	5.52962e+06	6.224e+06	6.87803e+06	6.86579e+06	0.016594	0.0444367	0.347355	0.0252562	0.026298	0.403051	0.414742	0.999995	0.888436	0.803955	0.805387	0.90491	0.906523	1.00178
Q9NQX6	ZN331_HUMAN	ZNF331	Zinc finger protein 331	31807.8	21352	16764.6	17551.8	0.022015	0.0545751	0.180559	0.0252763	0.0395296	0.656795	0.798852	0.993795	1.48969	1.89732	1.81222	1.27363	1.21651	0.95515
Q8N4V1	EMC5_HUMAN	MMGT1	ER membrane protein complex subunit 5	173056	256753	255237	230666	0.016135	0.043454	0.0226904	0.0253738	0.100605	0.999901	0.822247	0.852326	0.674016	0.67802	0.750243	1.00594	1.11309	1.10652
O95793	STAU1_HUMAN	STAU1	Double-stranded RNA-binding protein Staufen homolog 1	85396.2	93053.5	102043	90646.6	0.0373774	0.0813124	0.389037	0.0254126	0.664713	0.362097	0.958436	0.177632	0.91771	0.836866	0.942078	0.911907	1.02655	1.12572
P51808	DYLT3_HUMAN	DYNLT3	Dynein light chain Tctex-type 3	179538	263452	303759	333654	0.00976315	0.0297349	0.183812	0.0254744	0.00968931	0.652655	0.352283	0.944151	0.681482	0.591054	0.538097	0.867306	0.789598	0.910403
Q15642	CIP4_HUMAN	TRIP10	Cdc42-interacting protein 4	666028	723018	755522	714917	0.0376749	0.0818249	0.176342	0.0255045	0.274539	0.668633	0.99037	0.497143	0.921178	0.881547	0.931616	0.956978	1.01133	1.0568
Q9UPP1	PHF8_HUMAN	PHF8	Histone lysine demethylase PHF8	36520.1	55371.9	69670.2	54363.1	0.0394714	0.0845912	0.30992	0.0256024	0.220219	0.450967	0.994972	0.58484	0.659541	0.524184	0.671781	0.794772	1.01856	1.28157
P35659	DEK_HUMAN	DEK	Protein DEK	2.04369e+06	2.16018e+06	2.35571e+06	2.1632e+06	0.0388614	0.0836869	0.593117	0.0256115	0.547288	0.215652	0.999811	0.242465	0.946074	0.867551	0.944754	0.917001	0.998605	1.08899
Q13564	ULA1_HUMAN	NAE1	NEDD8-activating enzyme E1 regulatory subunit	448177	502326	513952	578660	0.000392985	0.00268865	0.0618062	0.0256342	0.000197258	0.95587	0.0210613	0.0509765	0.892205	0.872021	0.774509	0.977378	0.868084	0.888176
Q9Y265	RUVB1_HUMAN	RUVBL1	RuvB-like 1	2.07551e+06	2.41585e+06	2.53598e+06	2.27575e+06	0.030588	0.0696849	0.0977761	0.0256463	0.417631	0.862716	0.763237	0.338267	0.859119	0.818423	0.91201	0.95263	1.06156	1.11435
Q96GX9	MTNB_HUMAN	APIP	Methylthioribulose-1-phosphate dehydratase	143789	176714	176749	202982	0.00096532	0.00526797	0.0246563	0.0257734	0.000522369	0.999994	0.154246	0.148182	0.813686	0.813522	0.708385	0.999798	0.870588	0.870763
Q9UPU5	UBP24_HUMAN	USP24	Ubiquitin carboxyl-terminal hydrolase 24	254291	280501	280101	321458	3.46538e-05	0.000433622	0.024707	0.0257968	1.71294e-05	0.999994	0.00238434	0.00228819	0.906561	0.907855	0.791057	1.00143	0.872591	0.871347
P08047	SP1_HUMAN	SP1	Transcription factor Sp1	151612	238487	263082	253904	0.0196083	0.0502291	0.0760193	0.0258243	0.0374067	0.922261	0.975309	0.99644	0.635723	0.57629	0.597122	0.906512	0.939281	1.03615
P33947	ERD22_HUMAN	KDELR2	ER lumen protein-retaining receptor 2	32212.9	273516	391578	291045	0.0346778	0.076702	0.303868	0.0258679	0.122863	0.461814	0.930919	0.798717	0.117773	0.0822644	0.11068	0.698498	0.939773	1.34542
Q9Y3X0	CCDC9_HUMAN	CCDC9	Coiled-coil domain-containing protein 9	386520	363533	348374	315060	0.000199634	0.00163492	0.254072	0.0259166	0.000127676	0.532761	0.00274015	0.0299878	1.06323	1.1095	1.22681	1.04352	1.15385	1.10574
Q8NBM8	PCYXL_HUMAN	PCYOX1L	Prenylcysteine oxidase-like	43549.9	84456.6	91545.1	64858.2	0.0234166	0.057086	0.0490861	0.0260132	0.367532	0.98264	0.589129	0.389954	0.515648	0.475721	0.671463	0.922569	1.30217	1.41146
Q9NWM8	FKB14_HUMAN	FKBP14	Peptidyl-prolyl cis-trans isomerase FKBP14	86086.2	160108	163504	179819	0.00913314	0.0284051	0.0298858	0.0260228	0.0119549	0.999812	0.951873	0.969539	0.537676	0.526507	0.478737	0.979228	0.890383	0.90927
Q9BSH4	TACO1_HUMAN	TACO1	Translational activator of cytochrome c oxidase 1	403482	457052	496670	391634	0.0091773	0.0284621	0.222973	0.0261708	0.983929	0.587278	0.128311	0.0140502	0.882792	0.812374	1.03025	0.920232	1.16704	1.2682
Q8WV60	PTCD2_HUMAN	PTCD2	Pentatricopeptide repeat-containing protein 2, mitochondrial	427874	463428	505276	482857	0.0339712	0.0754928	0.385843	0.0262129	0.119841	0.373618	0.856349	0.810307	0.92328	0.846812	0.886128	0.917178	0.959762	1.04643
Q92546	RGP1_HUMAN	RGP1	RAB6A-GEF complex partner protein 2	47595.7	68660.8	67332.5	67165.1	0.0104693	0.0312761	0.0177027	0.0263058	0.0251873	0.995707	0.996956	0.999994	0.693201	0.706876	0.708638	1.01973	1.02227	1.00249
Q9BWM7	SFXN3_HUMAN	SFXN3	Sideroflexin-3	1.3108e+06	1.17224e+06	1.1566e+06	1.04379e+06	0.00055811	0.00349626	0.0521992	0.0263162	0.000280725	0.978373	0.037855	0.0745069	1.1182	1.13332	1.2558	1.01352	1.12305	1.10807
P21333	FLNA_HUMAN	FLNA	Filamin-A	2.77764e+07	3.1195e+07	3.39937e+07	3.4172e+07	0.0169675	0.0451987	0.276325	0.0263355	0.0243357	0.504801	0.479829	0.999965	0.89041	0.817104	0.812841	0.917671	0.912884	0.994783
Q9NRG0	CHRC1_HUMAN	CHRAC1	Chromatin accessibility complex protein 1	211429	262978	414558	372709	0.021177	0.0530734	0.828254	0.0263917	0.0939511	0.113627	0.344513	0.879896	0.803981	0.510011	0.567277	0.634358	0.705585	1.11228
Q99436	PSB7_HUMAN	PSMB7	Proteasome subunit beta type-7	2.7992e+06	3.12447e+06	3.73452e+06	3.46693e+06	0.0275436	0.0644602	0.666291	0.0263935	0.110729	0.182898	0.553169	0.835806	0.895898	0.749548	0.807402	0.836644	0.901221	1.07719
Q96GY0	ZC21A_HUMAN	ZC2HC1A	Zinc finger C2HC domain-containing protein 1A	125403	105812	99663.2	111222	0.0334922	0.0746794	0.111518	0.0264328	0.375448	0.834157	0.846064	0.386318	1.18514	1.25826	1.1275	1.0617	0.951361	0.896076
Q16666	IF16_HUMAN	IFI16	Gamma-interferon-inducible protein 16	774505	678493	620661	532546	0.000863841	0.00482677	0.226807	0.0264352	0.000543891	0.583938	0.0166074	0.150894	1.14151	1.24787	1.45434	1.09318	1.27405	1.16546
Q13042	CDC16_HUMAN	CDC16	Cell division cycle protein 16 homolog	465387	422475	395356	395167	0.0176742	0.0465745	0.257863	0.0264617	0.0255761	0.533685	0.522648	0.999997	1.10157	1.17713	1.1777	1.06859	1.0691	1.00048
Q9BY32	ITPA_HUMAN	ITPA	Inosine triphosphate pyrophosphatase	380319	430694	528966	494762	0.025676	0.0611066	0.553381	0.0264679	0.0754067	0.245373	0.532526	0.928362	0.883038	0.718985	0.76869	0.814218	0.870507	1.06913
Q9H2U1	DHX36_HUMAN	DHX36	ATP-dependent DNA/RNA helicase DHX36	597417	665756	698641	697016	0.018635	0.0484877	0.152126	0.0264748	0.027083	0.734454	0.741651	0.999999	0.897352	0.855114	0.857107	0.95293	0.955152	1.00233
P52594	AGFG1_HUMAN	AGFG1	Arf-GAP domain and FG repeat-containing protein 1	379336	443197	438820	454253	0.00538775	0.0190009	0.0165519	0.0265257	0.00623123	0.992823	0.941751	0.839326	0.855907	0.864446	0.835076	1.00998	0.975662	0.966025
Q99873	ANM1_HUMAN	PRMT1	Protein arginine N-methyltransferase 1	1.45615e+06	1.6611e+06	1.65647e+06	1.90565e+06	0.000149843	0.00132133	0.0212136	0.0265707	7.13409e-05	0.999198	0.0177789	0.0141947	0.876619	0.879068	0.764125	1.00279	0.871674	0.869245
P30153	2AAA_HUMAN	PPP2R1A	Serine/threonine-protein phosphatase 2A 65 kDa regulatory subunit A alpha isoform	2.48901e+06	2.69101e+06	2.8684e+06	3.01143e+06	0.00407776	0.0153299	0.303752	0.0265795	0.00337563	0.470352	0.0813579	0.644422	0.924934	0.867732	0.826519	0.938156	0.893598	0.952505
Q9H9B4	SFXN1_HUMAN	SFXN1	Sideroflexin-1	3.85552e+06	3.50073e+06	3.47135e+06	3.17549e+06	0.000538992	0.00340229	0.0460608	0.0266685	0.000269167	0.988776	0.0408972	0.0701446	1.10135	1.11067	1.21415	1.00846	1.10242	1.09317
P06703	S10A6_HUMAN	S100A6	Protein S100-A6	1.28383e+07	1.91554e+07	2.54822e+07	2.18452e+07	0.0325435	0.0730075	0.391075	0.0268816	0.101209	0.375423	0.801882	0.865361	0.670216	0.503814	0.587693	0.751718	0.876871	1.16649
Q9NVX0	HAUS2_HUMAN	HAUS2	HAUS augmin-like complex subunit 2	61708	82343.6	107392	90517.1	0.0370443	0.0807206	0.297135	0.0269278	0.137995	0.48312	0.95531	0.773095	0.749396	0.574607	0.681727	0.76676	0.909702	1.18642
Q96MX3	ZNF48_HUMAN	ZNF48	Zinc finger protein 48	33854.2	48228.5	61706.1	35355	0.0183927	0.0480655	0.2524	0.0269663	0.996959	0.548335	0.334127	0.0383105	0.701954	0.548636	0.957551	0.781584	1.36412	1.74533
P62829	RL23_HUMAN	RPL23	60S ribosomal protein L23	1.14846e+07	1.22627e+07	1.65624e+07	1.29397e+07	0.0273155	0.0639945	0.968727	0.0270273	0.684433	0.058857	0.90551	0.177925	0.936553	0.693418	0.887553	0.740394	0.947681	1.27997
Q6ZSJ8	CA122_HUMAN	C1orf122	Uncharacterized protein C1orf122	212892	260408	258884	264802	0.00914865	0.028429	0.0230653	0.0270525	0.0138218	0.999714	0.990864	0.979964	0.817533	0.822346	0.803965	1.00589	0.983404	0.977648
Q13136	LIPA1_HUMAN	PPFIA1	Liprin-alpha-1	419686	472364	512236	538008	0.00712425	0.023425	0.23537	0.0270596	0.00630903	0.577106	0.19587	0.837352	0.88848	0.819321	0.780073	0.92216	0.877986	0.952097
Q9HBE1	PATZ1_HUMAN	PATZ1	POZ-, AT hook-, and zinc finger-containing protein 1	42817.4	63027.7	82121.2	80834	0.0187445	0.0487053	0.381157	0.0271123	0.0313477	0.387646	0.429644	0.999783	0.679343	0.521393	0.529696	0.767497	0.779719	1.01592
Q9H0P0	5NT3A_HUMAN	NT5C3A	Cytosolic 5'-nucleotidase 3A	317424	328225	352994	318509	0.0212282	0.0531227	0.732375	0.0271272	0.999181	0.156427	0.801672	0.0340099	0.967093	0.899235	0.996594	0.929833	1.0305	1.10827
Q53HL2	BOREA_HUMAN	CDCA8	Borealin	144915	162896	189020	171594	0.0386439	0.0832999	0.508493	0.0271864	0.200344	0.280878	0.895408	0.64149	0.889618	0.766666	0.844524	0.861792	0.949311	1.10155
Q8TF01	PNISR_HUMAN	PNISR	Arginine/serine-rich protein PNISR	846332	848496	720116	651502	0.000313871	0.00229466	0.999977	0.0274469	0.000852065	0.0256283	0.000800505	0.22604	0.997449	1.17527	1.29905	1.17828	1.30237	1.10532
Q96SU4	OSBL9_HUMAN	OSBPL9	Oxysterol-binding protein-related protein 9	360077	381384	405625	405669	0.0162664	0.0437723	0.399964	0.0274684	0.024922	0.372755	0.346692	0.999935	0.944132	0.887708	0.887614	0.940237	0.940137	0.999893
O43896	KIF1C_HUMAN	KIF1C	Kinesin-like protein KIF1C	176363	168543	156108	147921	0.00201024	0.00908114	0.639151	0.0277797	0.00215883	0.205365	0.0169359	0.477526	1.0464	1.12975	1.19228	1.07966	1.13941	1.05535
P30084	ECHM_HUMAN	ECHS1	Enoyl-CoA hydratase, mitochondrial	1.86291e+06	1.97e+06	2.14345e+06	1.83249e+06	0.0124705	0.0357715	0.563807	0.0278088	0.977752	0.249021	0.353285	0.0138574	0.945642	0.869118	1.0166	0.919078	1.07504	1.16969
Q15653	IKBB_HUMAN	NFKBIB	NF-kappa-B inhibitor beta	66689.5	77677.3	108400	100186	0.0243484	0.0587951	0.560608	0.0278114	0.0633297	0.25105	0.468387	0.963263	0.858545	0.615216	0.66566	0.716579	0.775335	1.08199
Q15121	PEA15_HUMAN	PEA15	Astrocytic phosphoprotein PEA-15	47060.9	77034.7	123695	131061	0.0130318	0.0369327	0.540799	0.0278185	0.0209422	0.263895	0.207923	0.998398	0.610905	0.38046	0.359076	0.62278	0.587777	0.943794
Q6PI48	SYDM_HUMAN	DARS2	Aspartate--tRNA ligase, mitochondrial	747116	710482	713345	658608	1.03336e-05	0.000181154	0.0167108	0.0278341	5.41339e-06	0.990961	0.000727285	0.000461082	1.05156	1.04734	1.13439	0.995987	1.07876	1.08311
O75164	KDM4A_HUMAN	KDM4A	Lysine-specific demethylase 4A	60464.2	78318.7	90004.8	93377.1	0.0145905	0.0403101	0.156112	0.027878	0.0167753	0.741747	0.574799	0.991078	0.772028	0.671789	0.647528	0.870161	0.838736	0.963886
O43815	STRN_HUMAN	STRN	Striatin	276599	305198	315103	317823	0.0157753	0.0427818	0.112482	0.0278786	0.0196166	0.845956	0.743376	0.996982	0.906295	0.877804	0.870293	0.968564	0.960276	0.991443
P45877	PPIC_HUMAN	PPIC	Peptidyl-prolyl cis-trans isomerase C	306893	406762	410073	376498	0.022627	0.0556085	0.0381368	0.0279212	0.140287	0.997861	0.865316	0.778625	0.754477	0.748387	0.815124	0.991927	1.08038	1.08918
Q8N6M0	OTU6B_HUMAN	OTUD6B	Deubiquitinase OTUD6B	346965	320057	290320	269060	0.00229358	0.0100253	0.469765	0.0280541	0.00203563	0.317334	0.0267724	0.455354	1.08407	1.19511	1.28955	1.10243	1.18954	1.07902
Q9NVD7	PARVA_HUMAN	PARVA	Alpha-parvin	279323	331402	320491	340340	0.00210411	0.009396	0.00627612	0.0280645	0.00222793	0.82593	0.92697	0.484705	0.842852	0.871546	0.820717	1.03404	0.973738	0.94168
Q9H3K6	BOLA2_HUMAN	BOLA2B	BolA-like protein 2	632476	734935	765791	856031	0.00180266	0.00833713	0.0933532	0.0281082	0.00103123	0.895782	0.0880178	0.263585	0.860587	0.825911	0.738847	0.959707	0.858538	0.894583
P18206	VINC_HUMAN	VCL	Vinculin	3.39347e+07	4.05546e+07	3.8785e+07	4.03558e+07	0.00270651	0.0112782	0.00430253	0.0281673	0.00479502	0.707635	0.999903	0.743176	0.836765	0.874943	0.840888	1.04563	1.00493	0.961077
Q86Y82	STX12_HUMAN	STX12	Syntaxin-12	203225	256993	260199	251408	0.0202112	0.0513557	0.0414867	0.0281908	0.0608346	0.995951	0.995934	0.969661	0.790781	0.781036	0.808347	0.987678	1.02221	1.03497
Q8TBC4	UBA3_HUMAN	UBA3	NEDD8-activating enzyme E1 catalytic subunit	404095	444185	464413	539236	0.000153987	0.00134616	0.161211	0.0282179	8.85911e-05	0.734269	0.00294832	0.0175447	0.909745	0.87012	0.749385	0.956443	0.823731	0.861244
Q9UNF0	PACN2_HUMAN	PACSIN2	Protein kinase C and casein kinase substrate in neurons protein 2	724347	847392	860081	873363	0.0124118	0.0356341	0.0427948	0.0282539	0.0170215	0.994988	0.950802	0.991137	0.854796	0.842185	0.829377	0.985246	0.970263	0.984792
P13716	HEM2_HUMAN	ALAD	Delta-aminolevulinic acid dehydratase	119547	144032	143543	155667	0.00351138	0.0137725	0.0270888	0.0282818	0.00257346	0.999994	0.544596	0.53054	0.830001	0.832828	0.767963	1.00341	0.925256	0.922115
Q9BPX5	ARP5L_HUMAN	ARPC5L	Actin-related protein 2/3 complex subunit 5-like protein	569340	622102	763311	551339	0.0160381	0.0433112	0.693132	0.0283122	0.996378	0.181088	0.569186	0.0194824	0.915188	0.745883	1.03265	0.815005	1.12835	1.38447
P12236	ADT3_HUMAN	SLC25A6	ADP/ATP translocase 3	1.01157e+06	1.14394e+06	1.34065e+06	1.17484e+06	0.0440463	0.0922962	0.495	0.0283383	0.316823	0.30031	0.983564	0.473544	0.88429	0.75454	0.861032	0.853272	0.973699	1.14114
O75486	SUPT3_HUMAN	SUPT3H	Transcription initiation protein SPT3 homolog	36188.4	25390.7	16306.3	17842.9	0.0197563	0.0504343	0.368507	0.0284157	0.0322039	0.414244	0.451618	0.999861	1.42526	2.21929	2.02816	1.55711	1.42301	0.913881
Q92841	DDX17_HUMAN	DDX17	Probable ATP-dependent RNA helicase DDX17	2.29763e+06	2.38732e+06	2.51281e+06	2.47869e+06	0.0267009	0.0629337	0.523808	0.0284674	0.0696125	0.280537	0.535176	0.953457	0.96243	0.914367	0.926954	0.950061	0.963139	1.01377
Q9UBQ0	VPS29_HUMAN	VPS29	Vacuolar protein sorting-associated protein 29	888912	972502	1.08068e+06	1.10387e+06	0.011667	0.034043	0.440729	0.0284878	0.0152396	0.345348	0.207938	0.983658	0.914046	0.822545	0.80527	0.899895	0.880996	0.978999
Q9NP72	RAB18_HUMAN	RAB18	Ras-related protein Rab-18	658804	717837	720472	594278	3.54554e-05	0.00044046	0.0380918	0.0285416	0.0121457	0.998299	8.39763e-05	6.67409e-05	0.917763	0.914405	1.10858	0.996341	1.20791	1.21235
P54105	ICLN_HUMAN	CLNS1A	Methylosome subunit pICln	633932	589157	542569	574640	0.0426965	0.0899526	0.437754	0.0286081	0.22451	0.349046	0.959064	0.614232	1.076	1.16839	1.10318	1.08587	1.02526	0.944188
P49006	MRP_HUMAN	MARCKSL1	MARCKS-related protein	434477	387010	354319	289332	0.000211179	0.00172306	0.284192	0.0287529	0.000138137	0.521833	0.0026324	0.0297458	1.12265	1.22623	1.50166	1.09226	1.3376	1.22461
Q8WUY3	PRUN2_HUMAN	PRUNE2	Protein prune homolog 2	82702.3	110064	136296	216711	0.00053192	0.00338318	0.239603	0.0287942	0.000330123	0.590678	0.00883024	0.0818681	0.7514	0.606784	0.381625	0.807538	0.507885	0.62893
Q99747	SNAG_HUMAN	NAPG	Gamma-soluble NSF attachment protein	322184	361442	372516	340548	0.028331	0.0657673	0.0934356	0.028817	0.631799	0.900993	0.528376	0.215994	0.891385	0.864885	0.946074	0.970271	1.06135	1.09387
P60484	PTEN_HUMAN	PTEN	Phosphatidylinositol 3,4,5-trisphosphate 3-phosphatase and dual-specificity protein phosphatase PTEN	41444.5	46201.6	75173	75379.8	0.0092154	0.0285401	0.956316	0.0288337	0.0320817	0.0690933	0.076631	0.999913	0.897036	0.551322	0.549809	0.614604	0.612917	0.997256
P13498	CY24A_HUMAN	CYBA	Cytochrome b-245 light chain	39646.8	46161.5	67163.7	71606.5	0.00762255	0.0245606	0.846844	0.0289559	0.0160901	0.116177	0.0663041	0.986364	0.858872	0.5903	0.553676	0.687297	0.644655	0.937956
O76021	RL1D1_HUMAN	RSL1D1	Ribosomal L1 domain-containing protein 1	6.05116e+06	5.19451e+06	5.14875e+06	4.08682e+06	3.78926e-05	0.000459144	0.041046	0.029029	1.9432e-05	0.997068	0.00173608	0.0024148	1.16491	1.17527	1.48065	1.00889	1.27104	1.25984
Q96MW1	CCD43_HUMAN	CCDC43	Coiled-coil domain-containing protein 43	431437	516270	530002	595975	0.00233027	0.0101321	0.066474	0.0290917	0.00136229	0.962683	0.161491	0.325706	0.835681	0.814029	0.723918	0.974091	0.866262	0.889302
P17900	SAP3_HUMAN	GM2A	Ganglioside GM2 activator	28046.5	25558.8	52901.9	54683.2	0.00312997	0.0126134	0.988219	0.0291696	0.024077	0.0166838	0.0137699	0.999501	1.09733	0.53016	0.512891	0.483137	0.467399	0.967425
P46379	BAG6_HUMAN	BAG6	Large proline-rich protein BAG6	580274	594447	641160	672165	0.00153336	0.00741491	0.851471	0.029188	0.00216424	0.115126	0.00851753	0.462982	0.976158	0.905037	0.86329	0.927142	0.884376	0.953873
P48637	GSHB_HUMAN	GSS	Glutathione synthetase	651610	715814	758693	824127	0.00210096	0.00938826	0.235632	0.0292097	0.00140445	0.602085	0.0448029	0.332945	0.910306	0.858858	0.790667	0.943483	0.868573	0.920602
Q96BK5	PINX1_HUMAN	PINX1	PIN2/TERF1-interacting telomerase inhibitor 1	169704	192353	210159	178276	0.0329241	0.0736861	0.248461	0.0292536	0.84628	0.581475	0.658992	0.117527	0.882257	0.807503	0.951919	0.91527	1.07896	1.17884
Q9NRV9	HEBP1_HUMAN	HEBP1	Heme-binding protein 1	708545	824718	857116	839348	0.0249372	0.0598222	0.0900965	0.0292877	0.0530384	0.912302	0.988958	0.985598	0.859137	0.826662	0.844161	0.962201	0.982569	1.02117
Q9NZJ0	DTL_HUMAN	DTL	Denticleless protein homolog	154316	135787	179056	193076	2.64324e-05	0.00035871	0.0709094	0.0294495	0.00176109	0.000295973	2.96018e-05	0.395778	1.13646	0.86183	0.799248	0.758347	0.70328	0.927386
Q16514	TAF12_HUMAN	TAF12	Transcription initiation factor TFIID subunit 12	116396	170860	162234	162772	0.00963961	0.0294264	0.0133973	0.0294949	0.0260399	0.96828	0.980552	0.999863	0.681235	0.717454	0.715084	1.05317	1.04969	0.996696
Q09472	EP300_HUMAN	EP300	Histone acetyltransferase p300	141037	164936	179597	194451	0.00607334	0.0206157	0.216072	0.0297033	0.00480992	0.641761	0.167822	0.7273	0.855102	0.785296	0.725308	0.918365	0.848212	0.923611
Q16186	ADRM1_HUMAN	ADRM1	Proteasomal ubiquitin receptor ADRM1	1.48395e+06	1.6039e+06	1.74048e+06	1.77636e+06	0.0112921	0.0331982	0.394334	0.029743	0.0133178	0.400597	0.212243	0.96663	0.925215	0.852612	0.835392	0.921529	0.902916	0.979802
O75935	DCTN3_HUMAN	DCTN3	Dynactin subunit 3	555754	599277	653030	626786	0.0363584	0.0795144	0.426459	0.029747	0.115283	0.369663	0.806554	0.85599	0.927374	0.851038	0.886672	0.917686	0.956111	1.04187
Q9Y3A3	PHOCN_HUMAN	MOB4	MOB-like protein phocein	349784	384673	405595	431738	0.00394889	0.0149646	0.212864	0.0297522	0.00282011	0.648125	0.102765	0.54511	0.909302	0.862398	0.810178	0.948417	0.890989	0.939448
P61024	CKS1_HUMAN	CKS1B	Cyclin-dependent kinases regulatory subunit 1	736925	889264	1.18265e+06	1.39764e+06	0.0030118	0.0122859	0.634456	0.0298054	0.00333151	0.220798	0.0270166	0.601691	0.828691	0.623112	0.527263	0.751923	0.63626	0.846177
Q9Y316	MEMO1_HUMAN	MEMO1	Protein MEMO1	279669	306607	334247	357413	0.00440276	0.0162827	0.353008	0.0298826	0.00372651	0.446383	0.0743589	0.639385	0.912139	0.836712	0.782481	0.917307	0.857853	0.935186
P68366	TBA4A_HUMAN	TUBA4A	Tubulin alpha-4A chain	3.52294e+07	3.68341e+07	4.48334e+07	4.08883e+07	0.0265075	0.0625895	0.958592	0.0299068	0.250124	0.0704278	0.478345	0.586141	0.956434	0.785785	0.861602	0.821578	0.900848	1.09649
Q6UX04	CWC27_HUMAN	CWC27	Spliceosome-associated protein CWC27 homolog	340776	392701	433473	423709	0.0280874	0.0653166	0.261292	0.0300584	0.0536129	0.570259	0.761139	0.986622	0.867776	0.786154	0.804271	0.905941	0.926819	1.02305
Q06210	GFPT1_HUMAN	GFPT1	Glutamine--fructose-6-phosphate aminotransferase [isomerizing] 1	911423	814532	812562	762111	0.00216297	0.00958114	0.0328336	0.0301426	0.00130013	0.999955	0.284618	0.304676	1.11895	1.12167	1.19592	1.00242	1.06878	1.0662
Q9UHD1	CHRD1_HUMAN	CHORDC1	Cysteine and histidine-rich domain-containing protein 1	910082	1.00436e+06	1.17585e+06	1.19326e+06	0.011856	0.0345048	0.688894	0.0302114	0.0212833	0.193897	0.14181	0.997007	0.906129	0.773981	0.762688	0.854162	0.8417	0.98541
Q96CB8	INT12_HUMAN	INTS12	Integrator complex subunit 12	117187	115175	132212	121447	0.012425	0.0356565	0.95372	0.0302526	0.788063	0.0122585	0.495228	0.14667	1.01746	0.886353	0.964923	0.871139	0.948361	1.08864
P01024	CO3_HUMAN	C3	Complement C3	243692	187780	171254	129847	0.000530491	0.00338092	0.129007	0.0302982	0.00028784	0.828686	0.0151654	0.0668421	1.29775	1.42298	1.87676	1.0965	1.44617	1.31889
Q99595	TI17A_HUMAN	TIMM17A	Mitochondrial import inner membrane translocase subunit Tim17-A	79738.8	92452.4	130680	134692	0.00871058	0.0272965	0.888919	0.0303279	0.0210772	0.103301	0.0729353	0.99665	0.862484	0.610184	0.592008	0.707473	0.686399	0.970212
Q96G03	PGM2_HUMAN	PGM2	Phosphopentomutase	533642	645774	626429	729500	0.000311244	0.0022805	0.00925825	0.0305025	0.000163632	0.902202	0.109871	0.0343851	0.82636	0.851879	0.731517	1.03088	0.885228	0.858711
L0R819	ASURF_HUMAN	ASDURF	ASNSD1 upstream open reading frame protein	81220.9	102238	105489	131703	0.000663627	0.00397895	0.0564052	0.0306835	0.000334416	0.984455	0.0428042	0.0781148	0.79443	0.769943	0.616698	0.969177	0.776276	0.800965
Q155Q3	DIXC1_HUMAN	DIXDC1	Dixin	78743.8	85393.1	98201.7	95412.5	0.0240388	0.0582377	0.622579	0.0307179	0.0596784	0.233448	0.394848	0.979982	0.922134	0.801858	0.825299	0.869569	0.894988	1.02923
Q147X3	NAA30_HUMAN	NAA30	N-alpha-acetyltransferase 30	95487.9	109070	115153	115589	0.0203094	0.0515456	0.142028	0.030819	0.0276413	0.803899	0.771467	0.999908	0.875473	0.829229	0.8261	0.947179	0.943604	0.996226
Q96PK6	RBM14_HUMAN	RBM14	RNA-binding protein 14	3.15727e+06	2.88928e+06	2.98274e+06	2.55009e+06	3.39678e-07	1.3496e-05	0.00134058	0.0308992	2.17255e-07	0.306617	6.42342e-05	6.26367e-06	1.09275	1.05851	1.2381	0.968669	1.13301	1.16966
Q9Y6M1	IF2B2_HUMAN	IGF2BP2	Insulin-like growth factor 2 mRNA-binding protein 2	20889.8	115830	137210	119220	0.0219234	0.0544599	0.0545878	0.0309421	0.0501018	0.987321	0.999953	0.992165	0.18035	0.152247	0.175221	0.844175	0.971562	1.1509
Q9Y4I1	MYO5A_HUMAN	MYO5A	Unconventional myosin-Va	118782	129327	139006	129857	0.048472	0.099038	0.335748	0.0309487	0.305186	0.47758	0.999868	0.516672	0.918463	0.854511	0.914712	0.930371	0.995916	1.07045
P38646	GRP75_HUMAN	HSPA9	Stress-70 protein, mitochondrial	1.7319e+07	1.82029e+07	2.14107e+07	1.60973e+07	0.00720594	0.0235996	0.857795	0.0310024	0.758637	0.119034	0.329493	0.00552986	0.951442	0.808894	1.07589	0.850177	1.1308	1.33008
Q9HBR0	S38AA_HUMAN	SLC38A10	Putative sodium-coupled neutral amino acid transporter 10	41376	61438.3	73982.9	87556.8	0.00762594	0.0245606	0.197577	0.0310406	0.00622772	0.690706	0.230831	0.794818	0.673456	0.559264	0.472562	0.830439	0.701697	0.844971
Q8WVM8	SCFD1_HUMAN	SCFD1	Sec1 family domain-containing protein 1	1.2273e+06	1.45845e+06	1.41767e+06	1.30948e+06	0.00866232	0.027171	0.00990583	0.0310456	0.475453	0.912614	0.127721	0.338304	0.841509	0.865713	0.937242	1.02876	1.11376	1.08262
Q9Y3B4	SF3B6_HUMAN	SF3B6	Splicing factor 3B subunit 6	2.02254e+06	2.35155e+06	2.50366e+06	2.46456e+06	0.0277508	0.0648303	0.15663	0.0312304	0.0508601	0.775828	0.904274	0.991881	0.860084	0.80783	0.820649	0.939246	0.954149	1.01587
P62258	1433E_HUMAN	YWHAE	14-3-3 protein epsilon	3.50283e+07	4.119e+07	4.69332e+07	4.70835e+07	0.0197286	0.0504006	0.329312	0.0312653	0.0280123	0.488718	0.454543	0.999906	0.85041	0.746345	0.743962	0.87763	0.874827	0.996806
Q53S33	BOLA3_HUMAN	BOLA3	BolA-like protein 3	268970	311175	311604	296193	0.0230032	0.0563068	0.0337507	0.0314269	0.220554	0.999974	0.676247	0.652551	0.86437	0.863179	0.90809	0.998622	1.05058	1.05203
O00499	BIN1_HUMAN	BIN1	Myc box-dependent-interacting protein 1	814772	959096	940477	995746	0.00345297	0.0135999	0.0137886	0.0314662	0.00312314	0.964044	0.824445	0.561504	0.849521	0.866339	0.818253	1.0198	0.963194	0.944495
Q9NPI1	BRD7_HUMAN	BRD7	Bromodomain-containing protein 7	89960.8	110613	111512	112958	0.0146511	0.0404127	0.0422892	0.0314876	0.0222263	0.998175	0.982124	0.997053	0.813292	0.806736	0.796406	0.991939	0.979238	0.987196
O94887	FARP2_HUMAN	FARP2	FERM, ARHGEF and pleckstrin domain-containing protein 2	38809.7	52651.1	67174.1	75863	0.0089286	0.0278739	0.322254	0.0315013	0.00857965	0.500012	0.182921	0.877643	0.73711	0.577747	0.511575	0.783801	0.694029	0.885466
Q9UNW9	NOVA2_HUMAN	NOVA2	RNA-binding protein Nova-2	47360	74647.4	180497	69151.6	0.0394419	0.0845912	0.600225	0.0315704	0.87164	0.252595	0.955732	0.114949	0.634449	0.262386	0.684872	0.413565	1.07947	2.61017
Q96D71	REPS1_HUMAN	REPS1	RalBP1-associated Eps domain-containing protein 1	97545.9	110685	117800	100918	0.0286612	0.0663242	0.173419	0.0316228	0.896417	0.744496	0.45551	0.104111	0.88129	0.828061	0.966584	0.939601	1.09678	1.16729
O60831	PRAF2_HUMAN	PRAF2	PRA1 family protein 2	1.65301e+06	1.14048e+06	1.25177e+06	1.1396e+06	0.00445835	0.016406	0.00748753	0.0316646	0.0075081	0.841653	1	0.842392	1.44939	1.32054	1.45051	0.911098	1.00077	1.09843
Q9HAH7	FBRS_HUMAN	FBRS	Probable fibrosin-1	170132	245839	228948	284666	0.000929595	0.00513687	0.0100094	0.0317241	0.000578708	0.910344	0.359415	0.136115	0.692049	0.743105	0.597656	1.07378	0.863603	0.804268
O95429	BAG4_HUMAN	BAG4	BAG family molecular chaperone regulator 4	73518.3	91050.8	95715.3	113722	0.00165031	0.00781856	0.106076	0.0317492	0.000923774	0.892915	0.0688443	0.215269	0.807443	0.768094	0.646477	0.951267	0.800647	0.841663
Q92599	SEPT8_HUMAN	SEPTIN8	Septin-8	233210	291225	280515	293448	0.00503978	0.0180335	0.00929031	0.0318552	0.00786075	0.893495	0.999663	0.852968	0.80079	0.831364	0.794724	1.03818	0.992425	0.955927
Q96KB5	TOPK_HUMAN	PBK	Lymphokine-activated killer T-cell-originated protein kinase	432294	424159	488294	507125	0.00102671	0.00553923	0.972224	0.0318596	0.00563446	0.0150071	0.00271241	0.756072	1.01918	0.885315	0.85244	0.868656	0.8364	0.962866
P55212	CASP6_HUMAN	CASP6	Caspase-6	108070	104997	129823	137661	0.000840653	0.00474124	0.940017	0.0320203	0.00532804	0.0118639	0.00204272	0.736594	1.02927	0.83244	0.785041	0.808769	0.762718	0.94306
Q9UHR4	BI2L1_HUMAN	BAIAP2L1	Brain-specific angiogenesis inhibitor 1-associated protein 2-like protein 1	151669	165419	172709	137031	0.000480561	0.00313497	0.207997	0.0320509	0.107632	0.681732	0.00288086	0.000466529	0.916881	0.878181	1.10682	0.957791	1.20716	1.26036
P10746	HEM4_HUMAN	UROS	Uroporphyrinogen-III synthase	103407	140743	151614	179328	0.00494846	0.0178032	0.0960661	0.0320513	0.00333516	0.916862	0.26149	0.577884	0.734725	0.682045	0.576637	0.928299	0.784834	0.845454
Q13409	DC1I2_HUMAN	DYNC1I2	Cytoplasmic dynein 1 intermediate chain 2	1.41602e+06	1.59096e+06	1.61337e+06	1.6712e+06	0.00813804	0.0259063	0.0557401	0.032147	0.00698689	0.988385	0.64367	0.818301	0.890042	0.877676	0.847304	0.986106	0.951982	0.965395
Q9GZS3	WDR61_HUMAN	WDR61	WD repeat-containing protein 61	1.136e+06	1.2047e+06	1.27154e+06	1.20785e+06	0.051048	0.103173	0.361927	0.0324574	0.336832	0.461471	0.999938	0.491248	0.942979	0.893407	0.940515	0.947431	0.997388	1.05273
A2RUS2	DEND3_HUMAN	DENND3	DENN domain-containing protein 3	53830	58038.1	65299.1	78758.6	0.000227402	0.00180183	0.621918	0.0324607	0.0002046	0.244914	0.00138356	0.0421229	0.927493	0.82436	0.683481	0.888805	0.736912	0.829104
Q9UKF6	CPSF3_HUMAN	CPSF3	Cleavage and polyadenylation specificity factor subunit 3	378477	415466	430201	416642	0.037743	0.0819191	0.134607	0.0324835	0.122481	0.835148	0.999924	0.861862	0.91097	0.879768	0.908398	0.965749	0.997176	1.03254
P06493	CDK1_HUMAN	CDK1	Cyclin-dependent kinase 1	2.62933e+06	2.53369e+06	2.41729e+06	2.81294e+06	0.00067016	0.00400098	0.503751	0.0324842	0.102448	0.327033	0.00856578	0.000450769	1.03775	1.08772	0.934726	1.04816	0.900728	0.859346
Q9ULI3	HEG1_HUMAN	HEG1	Protein HEG homolog 1	34137.3	40412.3	50055.9	47754.9	0.0272123	0.0638379	0.50637	0.0324966	0.0584268	0.325069	0.494864	0.985985	0.844725	0.681984	0.714844	0.807344	0.846244	1.04818
P61758	PFD3_HUMAN	VBP1	Prefoldin subunit 3	727312	838121	892064	894154	0.0222123	0.054879	0.164033	0.0324996	0.0306293	0.772338	0.754027	0.999985	0.867789	0.815313	0.813408	0.93953	0.937334	0.997663
Q9H074	PAIP1_HUMAN	PAIP1	Polyadenylate-binding protein-interacting protein 1	1.2992e+06	1.43245e+06	1.44147e+06	1.58441e+06	0.000520364	0.003326	0.0437225	0.0325086	0.000256683	0.998145	0.0407829	0.0547464	0.906979	0.901304	0.81999	0.993744	0.90409	0.909781
Q9NV66	TYW1_HUMAN	TYW1	S-adenosyl-L-methionine-dependent tRNA 4-demethylwyosine synthase TYW1	40955.1	53977.3	63085.3	58250.7	0.034896	0.0771073	0.20734	0.0325479	0.0789305	0.688011	0.9301	0.954067	0.758747	0.649203	0.703084	0.855625	0.926639	1.083
Q12980	NPRL3_HUMAN	NPRL3	GATOR complex protein NPRL3	62964.7	97144	106800	124763	0.00951916	0.0291395	0.0778606	0.0326146	0.00824245	0.956319	0.584939	0.859164	0.648158	0.589556	0.504672	0.909587	0.778625	0.856021
P25788	PSA3_HUMAN	PSMA3	Proteasome subunit alpha type-3	2.80471e+06	3.39733e+06	3.44968e+06	3.42911e+06	0.0181034	0.0474972	0.0421483	0.0326289	0.0353079	0.998802	0.9996	0.999965	0.825562	0.813035	0.817912	0.984826	0.990734	1.006
Q49AR2	CE022_HUMAN	C5orf22	UPF0489 protein C5orf22	226065	267062	304475	348606	0.00396203	0.0149886	0.282649	0.032629	0.00294657	0.565457	0.0775016	0.529832	0.846488	0.742474	0.648482	0.877123	0.766085	0.873407
Q9UKI8	TLK1_HUMAN	TLK1	Serine/threonine-protein kinase tousled-like 1	122587	127551	157215	159409	0.00844001	0.0266562	0.937411	0.0326322	0.0226179	0.0877583	0.0615462	0.99657	0.961083	0.779738	0.769011	0.811312	0.800151	0.986242
P02765	FETUA_HUMAN	AHSG	Alpha-2-HS-glycoprotein	1.16723e+07	1.02992e+07	8.19374e+06	6.53802e+06	0.00112632	0.0058919	0.712943	0.0326367	0.00118531	0.194506	0.0071709	0.263842	1.13332	1.42453	1.78529	1.25696	1.57528	1.25324
O75817	POP7_HUMAN	POP7	Ribonuclease P protein subunit p20	332710	431625	447324	377526	0.0285676	0.0662234	0.0610523	0.0326455	0.473923	0.98305	0.542453	0.352739	0.770832	0.743779	0.881291	0.964904	1.1433	1.18488
P33993	MCM7_HUMAN	MCM7	DNA replication licensing factor MCM7	1.57817e+06	1.62205e+06	1.71231e+06	1.7154e+06	0.0148142	0.0408117	0.703868	0.0326681	0.0284609	0.199461	0.176718	0.999814	0.972946	0.921659	0.919999	0.947287	0.945581	0.998199
P60059	SC61G_HUMAN	SEC61G	Protein transport protein Sec61 subunit gamma	104287	233868	219720	190654	0.0173972	0.0460464	0.0229243	0.0326906	0.075089	0.996882	0.900801	0.961579	0.445924	0.474636	0.546998	1.06439	1.22666	1.15246
Q8TC07	TBC15_HUMAN	TBC1D15	TBC1 domain family member 15	289380	277055	273149	300545	0.000725287	0.00426082	0.125594	0.0327265	0.208583	0.856899	0.00338962	0.000918393	1.04449	1.05942	0.962852	1.0143	0.921843	0.908847
Q14344	GNA13_HUMAN	GNA13	Guanine nucleotide-binding protein subunit alpha-13	4.965e+06	4.34635e+06	4.33715e+06	4.12083e+06	0.00527757	0.0186621	0.0354778	0.0327716	0.00410352	0.999964	0.615068	0.641608	1.14234	1.14476	1.20485	1.00212	1.05473	1.05249
Q13033	STRN3_HUMAN	STRN3	Striatin-3	224909	257130	269153	249534	0.0414617	0.0880528	0.122291	0.0327987	0.283695	0.864701	0.944522	0.565657	0.874691	0.835619	0.901317	0.95533	1.03044	1.07862
O15164	TIF1A_HUMAN	TRIM24	Transcription intermediary factor 1-alpha	242413	264089	292924	342653	0.000491237	0.00317954	0.533329	0.032854	0.000404569	0.307213	0.00379892	0.0901841	0.917923	0.827564	0.70746	0.901562	0.770718	0.85487
Q9NYF8	BCLF1_HUMAN	BCLAF1	Bcl-2-associated transcription factor 1	1.71383e+06	1.6441e+06	1.56539e+06	1.46351e+06	0.000693303	0.00411314	0.484667	0.0329419	0.000547143	0.346091	0.00615552	0.124055	1.04241	1.09483	1.17104	1.05028	1.1234	1.06961
Q13795	ARFRP_HUMAN	ARFRP1	ADP-ribosylation factor-related protein 1	75040.2	85249.1	96428.4	80835.5	0.0448511	0.0935378	0.484911	0.033002	0.790739	0.346367	0.947604	0.157422	0.880246	0.778196	0.928307	0.884066	1.0546	1.1929
O00410	IPO5_HUMAN	IPO5	Importin-5	2.09895e+06	2.35308e+06	2.6264e+06	2.73041e+06	0.0103331	0.0310134	0.467908	0.0331062	0.0119464	0.361658	0.155046	0.935581	0.892004	0.799175	0.768731	0.895932	0.861802	0.961906
O43653	PSCA_HUMAN	PSCA	Prostate stem cell antigen	33444.8	63156.9	152429	179432	0.00549754	0.0192509	0.619561	0.0331692	0.00640997	0.250825	0.0549275	0.783755	0.529551	0.219412	0.186392	0.414335	0.351982	0.849509
Q13112	CAF1B_HUMAN	CHAF1B	Chromatin assembly factor 1 subunit B	2.60647e+06	2.71165e+06	2.88082e+06	2.80215e+06	0.0389285	0.0838041	0.61736	0.0332366	0.148023	0.252624	0.705937	0.812608	0.961211	0.904765	0.930167	0.941276	0.967703	1.02808
Q8NB46	ANR52_HUMAN	ANKRD52	Serine/threonine-protein phosphatase 6 regulatory ankyrin repeat subunit C	49726.4	62037	71699.3	81580.1	0.00688259	0.0227208	0.244945	0.033259	0.00551109	0.629991	0.166358	0.735434	0.80156	0.693541	0.609541	0.865239	0.760443	0.878882
Q15819	UB2V2_HUMAN	UBE2V2	Ubiquitin-conjugating enzyme E2 variant 2	3.55285e+06	3.80894e+06	4.15278e+06	4.35716e+06	0.00599945	0.0204489	0.473847	0.0335082	0.00591892	0.359774	0.0784836	0.755914	0.932768	0.855536	0.815405	0.917201	0.874178	0.953093
Q8N142	PURA1_HUMAN	ADSS1	Adenylosuccinate synthetase isozyme 1	102208	117831	139449	175560	0.000794583	0.00454666	0.570245	0.0335765	0.000686839	0.285892	0.00608962	0.153756	0.867416	0.732944	0.582185	0.844974	0.671171	0.79431
Q9Y4L1	HYOU1_HUMAN	HYOU1	Hypoxia up-regulated protein 1	1.80345e+06	2.02184e+06	2.00548e+06	1.60514e+06	4.3439e-05	0.000511744	0.0232931	0.0336071	0.0192005	0.996566	8.16708e-05	0.000109739	0.891981	0.89926	1.12354	1.00816	1.2596	1.24941
Q9Y5A9	YTHD2_HUMAN	YTHDF2	YTH domain-containing family protein 2	971331	1.02203e+06	1.08316e+06	1.14563e+06	0.0023586	0.0102218	0.464225	0.0336432	0.00196525	0.369252	0.0262629	0.390863	0.95039	0.896757	0.847857	0.943568	0.892115	0.94547
P01111	RASN_HUMAN	NRAS	GTPase NRas	1.80724e+06	1.56059e+06	1.6074e+06	1.45979e+06	0.000687616	0.00408307	0.00759018	0.0336504	0.000429777	0.828854	0.344421	0.0941146	1.15805	1.12432	1.23802	0.970875	1.06905	1.10112
P52434	RPAB3_HUMAN	POLR2H	DNA-directed RNA polymerases I, II, and III subunit RPABC3	365938	427844	440456	444288	0.0181757	0.0476112	0.0745107	0.0338017	0.0243676	0.966639	0.915041	0.997545	0.855306	0.830816	0.82365	0.971367	0.962988	0.991374
Q6P087	RUSD3_HUMAN	RPUSD3	Mitochondrial mRNA pseudouridine synthase RPUSD3	175919	203289	224295	215871	0.0394052	0.0845549	0.274803	0.0338083	0.0994171	0.588814	0.911973	0.920227	0.865364	0.78432	0.814926	0.906346	0.941714	1.03902
Q8TCD5	NT5C_HUMAN	NT5C	5'(3')-deoxyribonucleotidase, cytosolic type	92976.4	91597.9	124478	117042	0.00897009	0.0279902	0.99181	0.0339199	0.109398	0.0207251	0.0682708	0.900259	1.01505	0.746933	0.794388	0.735859	0.782611	1.06353
Q12849	GRSF1_HUMAN	GRSF1	G-rich sequence factor 1	2.01964e+06	2.19129e+06	2.31616e+06	1.97853e+06	0.0109638	0.0324786	0.269246	0.0339524	0.965729	0.598601	0.132814	0.0150912	0.921668	0.871978	1.02078	0.946087	1.10754	1.17065
Q9UJC3	HOOK1_HUMAN	HOOK1	Protein Hook homolog 1	111233	109887	144101	145620	0.00486351	0.0175837	0.998898	0.0339815	0.0295831	0.0264682	0.023033	0.99981	1.01226	0.771913	0.763861	0.762567	0.754612	0.989569
Q04446	GLGB_HUMAN	GBE1	1,4-alpha-glucan-branching enzyme	867382	984344	956325	1.12018e+06	2.17081e-05	0.000311889	0.00590295	0.0340087	1.10682e-05	0.750416	0.00527985	0.000991841	0.881178	0.906995	0.774326	1.0293	0.87874	0.853727
Q15022	SUZ12_HUMAN	SUZ12	Polycomb protein SUZ12	334895	339459	392119	341800	0.0251078	0.060144	0.99581	0.0341458	0.970622	0.0503872	0.996332	0.0727111	0.986557	0.854065	0.979799	0.865703	0.99315	1.14722
Q8NC96	NECP1_HUMAN	NECAP1	Adaptin ear-binding coat-associated protein 1	327643	357987	356961	368580	0.00525273	0.0186027	0.027845	0.0342199	0.00433593	0.999378	0.713934	0.645988	0.915238	0.917867	0.888935	1.00287	0.97126	0.968479
O14641	DVL2_HUMAN	DVL2	Segment polarity protein dishevelled homolog DVL-2	350499	339168	403782	449849	0.000103365	0.00100907	0.838039	0.034249	0.000547337	0.00798697	0.000156017	0.11968	1.03341	0.868039	0.779149	0.839977	0.75396	0.897596
Q96IU4	ABHEB_HUMAN	ABHD14B	Putative protein-lysine deacylase ABHD14B	284676	341679	357876	404036	0.00331486	0.0131421	0.102344	0.0343083	0.00200793	0.917142	0.156219	0.391716	0.833169	0.79546	0.70458	0.954741	0.845663	0.885751
O94851	MICA2_HUMAN	MICAL2	[F-actin]-monooxygenase MICAL2	43279.3	55862	66566.9	45679.5	0.0264261	0.062442	0.286662	0.0343796	0.990868	0.576985	0.421057	0.0570311	0.774754	0.650162	0.947456	0.839186	1.22291	1.45726
Q13144	EI2BE_HUMAN	EIF2B5	Translation initiation factor eIF-2B subunit epsilon	288999	277419	256308	272820	0.0497182	0.100949	0.706521	0.0344013	0.472027	0.207142	0.975853	0.368482	1.04174	1.12754	1.0593	1.08237	1.01686	0.939477
P50990	TCPQ_HUMAN	CCT8	T-complex protein 1 subunit theta	7.43723e+06	8.04028e+06	8.38155e+06	8.73105e+06	0.00604873	0.020552	0.202528	0.034417	0.00444796	0.715122	0.167105	0.652766	0.924997	0.887334	0.851814	0.959283	0.920883	0.959971
Q9NP50	SHCAF_HUMAN	SINHCAF	SIN3-HDAC complex-associated factor	26044.8	34234	41703.2	42187.8	0.0215899	0.0538581	0.349626	0.034517	0.0302295	0.495212	0.453794	0.999833	0.760786	0.624527	0.617354	0.820897	0.811468	0.988514
P09234	RU1C_HUMAN	SNRPC	U1 small nuclear ribonucleoprotein C	1.14019e+06	1.38368e+06	1.44235e+06	1.58283e+06	0.00568723	0.0196584	0.0887752	0.0345506	0.00389765	0.944758	0.317681	0.606295	0.824025	0.790504	0.720348	0.959321	0.874183	0.911252
P98170	XIAP_HUMAN	XIAP	E3 ubiquitin-protein ligase XIAP	209850	234963	243582	258372	0.00560213	0.0194495	0.129838	0.0348633	0.00382647	0.863844	0.22508	0.596966	0.893118	0.861515	0.812202	0.964614	0.9094	0.94276
Q6PIU2	NCEH1_HUMAN	NCEH1	Neutral cholesterol ester hydrolase 1	1.16242e+06	1.00587e+06	986822	634423	5.0947e-07	1.81052e-05	0.0672515	0.0349607	4.08312e-07	0.980603	8.14892e-06	1.29171e-05	1.15563	1.17794	1.83224	1.0193	1.58549	1.55546
P11177	ODPB_HUMAN	PDHB	Pyruvate dehydrogenase E1 component subunit beta, mitochondrial	2.13216e+06	2.27284e+06	2.74122e+06	2.37201e+06	0.0455411	0.0944871	0.838594	0.0349762	0.514455	0.142393	0.935308	0.337403	0.938104	0.777814	0.898884	0.829134	0.958192	1.15565
Q9BQ04	RBM4B_HUMAN	RBM4B	RNA-binding protein 4B	79687.4	82724.4	103897	101624	0.0125791	0.0359894	0.985535	0.0350451	0.0550423	0.0633203	0.0982398	0.993474	0.963288	0.766982	0.784141	0.796213	0.814026	1.02237
P85037	FOXK1_HUMAN	FOXK1	Forkhead box protein K1	1.45379e+06	1.29933e+06	1.32324e+06	1.30352e+06	0.00804354	0.0256686	0.0130264	0.0350471	0.0149086	0.940508	0.999826	0.960268	1.11887	1.09866	1.11527	0.981936	0.996785	1.01512
O15155	BET1_HUMAN	BET1	BET1 homolog	130218	185733	198818	163119	0.0353848	0.0779268	0.072892	0.0350846	0.310094	0.973217	0.791745	0.550977	0.701101	0.654958	0.798298	0.934185	1.13864	1.21885
Q96RL1	UIMC1_HUMAN	UIMC1	BRCA1-A complex subunit RAP80	134472	171683	169276	177834	0.009397	0.0288591	0.0276367	0.035127	0.011189	0.999023	0.953583	0.912289	0.78326	0.794397	0.756166	1.01422	0.965409	0.951875
P50583	AP4A_HUMAN	NUDT2	Bis(5'-nucleosyl)-tetraphosphatase [asymmetrical]	360960	430500	441715	486826	0.00394124	0.0149527	0.0656625	0.0351458	0.00247399	0.983008	0.2801	0.448926	0.838466	0.817178	0.741455	0.97461	0.884299	0.907336
Q7Z3T8	ZFY16_HUMAN	ZFYVE16	Zinc finger FYVE domain-containing protein 16	47835.8	52550.7	67127.5	69792.6	0.0114067	0.0334309	0.725137	0.0351884	0.0189023	0.200978	0.114641	0.983915	0.91028	0.712612	0.6854	0.782849	0.752955	0.961814
Q9BUB5	MKNK1_HUMAN	MKNK1	MAP kinase-interacting serine/threonine-protein kinase 1	32089.2	30520.8	50733	55984.9	0.00167277	0.00789667	0.983526	0.0352671	0.0090631	0.0188468	0.004883	0.863479	1.05139	0.632511	0.573176	0.601597	0.545162	0.906191
P60903	S10AA_HUMAN	S100A10	Protein S100-A10	5.46252e+06	6.33571e+06	6.56428e+06	5.64712e+06	0.021746	0.054152	0.0960829	0.0353107	0.9358	0.934705	0.240113	0.0955009	0.86218	0.832159	0.967311	0.965179	1.12194	1.16241
O75330	HMMR_HUMAN	HMMR	Hyaluronan mediated motility receptor	147026	161910	168843	216582	8.59519e-06	0.000159566	0.172975	0.0353136	6.08976e-06	0.779558	0.000107005	0.000436594	0.908073	0.870786	0.678848	0.958938	0.74757	0.779581
Q96G25	MED8_HUMAN	MED8	Mediator of RNA polymerase II transcription subunit 8	37019.6	48854.7	50929.5	42751.9	0.0324679	0.072912	0.070706	0.0354205	0.478341	0.97721	0.587495	0.370954	0.75775	0.726881	0.865918	0.959261	1.14275	1.19128
Q7Z434	MAVS_HUMAN	MAVS	Mitochondrial antiviral-signaling protein	174465	206246	227230	258796	0.00307305	0.0124753	0.237498	0.0354432	0.00204706	0.663515	0.0657762	0.388246	0.845908	0.767791	0.674142	0.907654	0.796945	0.878027
P06858	LIPL_HUMAN	LPL	Lipoprotein lipase	339187	327306	392517	563066	1.91708e-07	8.61906e-06	0.867326	0.0355648	6.11728e-07	0.00928125	2.91957e-07	2.14877e-05	1.0363	0.864133	0.602393	0.833865	0.581293	0.697106
P01023	A2MG_HUMAN	A2M	Alpha-2-macroglobulin	1.28171e+06	997071	970660	707489	0.000169249	0.00144146	0.0655738	0.035751	8.50776e-05	0.984403	0.0071368	0.0131566	1.28548	1.32046	1.81164	1.02721	1.40931	1.37198
Q8IVT2	MISP_HUMAN	MISP	Mitotic interactor and substrate of PLK1	1.30217e+06	1.31784e+06	1.19739e+06	1.06616e+06	1.16064e-05	0.000197697	0.965053	0.0358383	3.36501e-05	0.0158434	1.84215e-05	0.00403074	0.988111	1.08751	1.22136	1.10059	1.23606	1.12309
Q58WW2	DCAF6_HUMAN	DCAF6	DDB1- and CUL4-associated factor 6	70692.9	88969.4	92416.6	118152	0.000614918	0.00374561	0.0908263	0.0359757	0.0003159	0.947334	0.0245548	0.0627703	0.794576	0.764938	0.598323	0.9627	0.753009	0.782184
Q9BW27	NUP85_HUMAN	NUP85	Nuclear pore complex protein Nup85	787501	817908	924809	868635	0.0362892	0.0794157	0.913171	0.0360633	0.26185	0.109335	0.584618	0.630149	0.962823	0.851528	0.906596	0.884408	0.941602	1.06467
O43164	PJA2_HUMAN	PJA2	E3 ubiquitin-protein ligase Praja-2	33642.5	48995.9	51936.4	125615	3.53304e-06	8.05167e-05	0.0888643	0.0360945	2.43809e-06	0.95124	6.1523e-05	0.000128696	0.686638	0.647762	0.267822	0.943383	0.390049	0.413457
P13861	KAP2_HUMAN	PRKAR2A	cAMP-dependent protein kinase type II-alpha regulatory subunit	942146	1.02781e+06	1.06036e+06	997109	0.045406	0.0943673	0.147155	0.0361394	0.468951	0.837716	0.841198	0.384866	0.91665	0.888512	0.944877	0.969304	1.03079	1.06344
Q9UJX6	ANC2_HUMAN	ANAPC2	Anaphase-promoting complex subunit 2	267515	322253	326376	321067	0.0243602	0.0587951	0.0531617	0.0362264	0.0563438	0.995965	0.999985	0.993865	0.830139	0.819652	0.833208	0.987367	1.0037	1.01654
P17987	TCPA_HUMAN	TCP1	T-complex protein 1 subunit alpha	5.14794e+06	5.56964e+06	5.87978e+06	5.9501e+06	0.019582	0.0501813	0.285616	0.0364551	0.0232848	0.598051	0.453484	0.993772	0.924286	0.875534	0.865186	0.947254	0.936058	0.988181
Q2M1P5	KIF7_HUMAN	KIF7	Kinesin-like protein KIF7	56617.7	78296.3	92800.7	79306.9	0.0454866	0.0944457	0.175041	0.0365055	0.153155	0.785554	0.999765	0.828463	0.723121	0.6101	0.713906	0.843704	0.987258	1.17015
Q7Z2W4	ZCCHV_HUMAN	ZC3HAV1	Zinc finger CCCH-type antiviral protein 1	2.20084e+06	2.03152e+06	1.96209e+06	1.17872e+06	2.91303e-09	3.70235e-07	0.180653	0.0366418	4.49951e-09	0.77594	2.02157e-08	4.27858e-08	1.08335	1.12168	1.86715	1.03538	1.7235	1.6646
Q8TAQ2	SMRC2_HUMAN	SMARCC2	SWI/SNF complex subunit SMARCC2	409522	432954	436248	438645	0.0175831	0.0464269	0.0675378	0.0367691	0.0222807	0.984248	0.917373	0.991379	0.945878	0.938735	0.933607	0.992449	0.987028	0.994538
Q8TEA8	DTD1_HUMAN	DTD1	D-aminoacyl-tRNA deacylase 1	146041	174753	174037	169440	0.0223379	0.0551254	0.032502	0.0367903	0.0848384	0.999864	0.94255	0.960532	0.835697	0.839135	0.861901	1.00411	1.03136	1.02713
P09622	DLDH_HUMAN	DLD	Dihydrolipoyl dehydrogenase, mitochondrial	1.62835e+06	1.69923e+06	1.79557e+06	1.54014e+06	0.00236866	0.0102384	0.552011	0.0369683	0.317325	0.322247	0.0362454	0.00165311	0.958283	0.906868	1.05727	0.946347	1.1033	1.16585
P41252	SYIC_HUMAN	IARS1	Isoleucine--tRNA ligase, cytoplasmic	1.76454e+06	1.90323e+06	1.96425e+06	2.11671e+06	0.00163988	0.0077859	0.184833	0.0370949	0.000964897	0.771797	0.0396518	0.196	0.927131	0.89833	0.833627	0.968936	0.899147	0.927974
Q9HAW4	CLSPN_HUMAN	CLSPN	Claspin	140939	155719	168386	180860	0.00519181	0.0184279	0.353665	0.0371341	0.00416072	0.513774	0.0827475	0.604528	0.905081	0.836996	0.779269	0.924775	0.860994	0.931031
O15027	SC16A_HUMAN	SEC16A	Protein transport protein Sec16A	788046	840291	895163	992113	0.000775533	0.00448033	0.423354	0.0371538	0.000564762	0.436579	0.00777566	0.114584	0.937825	0.880338	0.794311	0.938702	0.846971	0.902279
P20839	IMDH1_HUMAN	IMPDH1	Inosine-5'-monophosphate dehydrogenase 1	421982	376557	380888	357900	0.00225189	0.00987575	0.0192775	0.0372767	0.00148011	0.980896	0.466639	0.287256	1.12063	1.10789	1.17905	0.98863	1.05213	1.06423
Q8TAF3	WDR48_HUMAN	WDR48	WD repeat-containing protein 48	430600	504344	501477	545670	0.00296583	0.0121294	0.0317113	0.0373303	0.00188015	0.99969	0.394404	0.349625	0.853783	0.858665	0.789123	1.00572	0.924266	0.919011
P49770	EI2BB_HUMAN	EIF2B2	Translation initiation factor eIF-2B subunit beta	338498	353874	369887	360484	0.0494835	0.100574	0.428376	0.0373325	0.168068	0.432944	0.908085	0.805613	0.956548	0.915138	0.93901	0.95671	0.981666	1.02609
Q9BTY7	HGH1_HUMAN	HGH1	Protein HGH1 homolog	253383	193695	195344	177303	0.0049734	0.0178443	0.0281282	0.0375685	0.00389414	0.998287	0.674519	0.57802	1.30815	1.29711	1.42909	0.99156	1.09245	1.10175
O14777	NDC80_HUMAN	NDC80	Kinetochore protein NDC80 homolog	436750	466834	478735	578502	3.97808e-06	8.85224e-05	0.168303	0.0376457	3.01647e-06	0.807585	4.68097e-05	0.000164244	0.935558	0.912301	0.754968	0.975141	0.806971	0.827543
P23921	RIR1_HUMAN	RRM1	Ribonucleoside-diphosphate reductase large subunit	1.51587e+06	1.58585e+06	1.70398e+06	1.88944e+06	0.000434086	0.00291552	0.618578	0.0376642	0.000381512	0.279077	0.00277581	0.0741111	0.955872	0.889608	0.802284	0.930677	0.839322	0.90184
Q9HC21	TPC_HUMAN	SLC25A19	Mitochondrial thiamine pyrophosphate carrier	151853	120505	122558	120358	0.0139196	0.0388654	0.0253135	0.0377889	0.0260536	0.995515	0.999998	0.996401	1.26014	1.23903	1.26168	0.983248	1.00122	1.01828
Q9UJX2	CDC23_HUMAN	CDC23	Cell division cycle protein 23 homolog	273059	301658	303091	293970	0.0306969	0.069885	0.0494074	0.0377902	0.167787	0.998609	0.880616	0.80968	0.905196	0.900916	0.928868	0.995272	1.02615	1.03103
Q6SJ93	F111B_HUMAN	FAM111B	Serine protease FAM111B	62092.6	63676.9	82637.5	91464.3	0.0025688	0.0108125	0.982097	0.0378952	0.00555375	0.0714762	0.010518	0.695674	0.97512	0.751385	0.678872	0.770556	0.696194	0.903495
O15269	SPTC1_HUMAN	SPTLC1	Serine palmitoyltransferase 1	554981	553957	651524	604971	0.0221621	0.0547948	0.999954	0.0379664	0.357081	0.0348342	0.334477	0.516813	1.00185	0.85182	0.917368	0.850249	0.915676	1.07695
P62312	LSM6_HUMAN	LSM6	U6 snRNA-associated Sm-like protein LSm6	551888	605051	739260	527014	0.0194274	0.0499282	0.691892	0.038002	0.98756	0.234328	0.50438	0.021533	0.912134	0.74654	1.0472	0.818455	1.14807	1.40273
Q6PJ69	TRI65_HUMAN	TRIM65	Tripartite motif-containing protein 65	176271	159916	153272	152994	0.0271352	0.0636847	0.193932	0.0380669	0.0377395	0.762941	0.760257	1	1.10227	1.15006	1.15215	1.04335	1.04525	1.00182
P62244	RS15A_HUMAN	RPS15A	40S ribosomal protein S15a	6.18139e+06	6.41146e+06	7.8383e+06	6.93513e+06	0.038327	0.0828601	0.967234	0.0380718	0.457231	0.0831942	0.717405	0.410604	0.964116	0.788614	0.891316	0.817965	0.92449	1.13023
P05121	PAI1_HUMAN	SERPINE1	Plasminogen activator inhibitor 1	125953	95627.7	87996.6	73356.7	0.00388389	0.0148088	0.0844771	0.0380929	0.00236099	0.965427	0.216593	0.410356	1.31712	1.43134	1.717	1.08672	1.3036	1.19957
Q8NBA8	DTWD2_HUMAN	DTWD2	tRNA-uridine aminocarboxypropyltransferase 2	195079	154015	142207	166294	0.0494009	0.100489	0.171833	0.0381052	0.494867	0.804378	0.864381	0.376707	1.26663	1.3718	1.1731	1.08304	0.926159	0.85515
Q12824	SNF5_HUMAN	SMARCB1	SWI/SNF-related matrix-associated actin-dependent regulator of chromatin subfamily B member 1	862083	961328	1.00222e+06	850923	0.0137426	0.0385013	0.158084	0.0381253	0.998316	0.83081	0.121398	0.0285957	0.896763	0.860169	1.01312	0.959194	1.12975	1.17781
Q86VW0	SESD1_HUMAN	SESTD1	SEC14 domain and spectrin repeat-containing protein 1	154928	195698	203479	236630	0.00369887	0.0142958	0.0775264	0.0381966	0.00222887	0.975375	0.221984	0.392279	0.791668	0.761396	0.654726	0.961762	0.827022	0.859903
P61599	NAA20_HUMAN	NAA20	N-alpha-acetyltransferase 20	155539	186607	182351	192402	0.00574549	0.019808	0.0166402	0.0382365	0.00614898	0.96309	0.938672	0.726267	0.833509	0.852963	0.808405	1.02334	0.969883	0.947761
Q13057	COASY_HUMAN	COASY	Bifunctional coenzyme A synthase	428825	377099	391578	404422	0.00540934	0.0190669	0.00380904	0.0382821	0.225167	0.564241	0.129221	0.709699	1.13717	1.09512	1.06034	0.963024	0.932439	0.968241
P49116	NR2C2_HUMAN	NR2C2	Nuclear receptor subfamily 2 group C member 2	79126.8	121516	128324	136588	0.0175225	0.0463224	0.0649465	0.0385543	0.0217523	0.989912	0.920507	0.987279	0.651166	0.616616	0.579311	0.946942	0.889653	0.939501
O60245	PCDH7_HUMAN	PCDH7	Protocadherin-7	149863	188666	176189	135418	0.000149652	0.00132133	0.0042303	0.0385637	0.281749	0.597546	0.00020617	0.00149405	0.79433	0.850579	1.10666	1.07081	1.3932	1.30107
Q9NVQ4	FAIM1_HUMAN	FAIM	Fas apoptotic inhibitory molecule 1	140326	152930	177421	170735	0.0360537	0.0790574	0.639487	0.0386638	0.0977935	0.270977	0.536472	0.94653	0.917584	0.790921	0.821895	0.861961	0.895717	1.03916
P28799	GRN_HUMAN	GRN	Progranulin	289122	337459	415855	483114	0.00395213	0.0149682	0.678497	0.038671	0.00434594	0.246036	0.0311042	0.605826	0.856763	0.695247	0.598455	0.811482	0.698507	0.86078
Q9NVZ3	NECP2_HUMAN	NECAP2	Adaptin ear-binding coat-associated protein 2	222375	318043	284014	310711	0.00261524	0.0109601	0.00342477	0.038738	0.0054737	0.524471	0.992374	0.683567	0.6992	0.782974	0.715699	1.11981	1.0236	0.914078
O75380	NDUS6_HUMAN	NDUFS6	NADH dehydrogenase [ubiquinone] iron-sulfur protein 6, mitochondrial	281818	338099	386438	392797	0.0227334	0.0558116	0.274814	0.0388788	0.0278358	0.635573	0.524804	0.997372	0.833535	0.72927	0.717464	0.874912	0.860748	0.983811
Q24JP5	T132A_HUMAN	TMEM132A	Transmembrane protein 132A	52482.3	64995.5	96039.7	134484	0.00268366	0.0112042	0.701795	0.0389699	0.00287132	0.233345	0.0188807	0.464703	0.807475	0.546464	0.390248	0.676757	0.483295	0.714134
Q9UBX8	B4GT6_HUMAN	B4GALT6	Beta-1,4-galactosyltransferase 6	561278	653654	674141	728986	0.00562683	0.0195109	0.0924164	0.0390914	0.00369777	0.956756	0.294514	0.547276	0.858678	0.832582	0.769944	0.96961	0.896662	0.924766
Q9ULD0	OGDHL_HUMAN	OGDHL	2-oxoglutarate dehydrogenase-like, mitochondrial	781950	711988	700845	608834	0.000117799	0.00111698	0.0862915	0.0391055	6.19349e-05	0.965929	0.00364778	0.00806819	1.09826	1.11572	1.28434	1.0159	1.16943	1.15113
Q15172	2A5A_HUMAN	PPP2R5A	Serine/threonine-protein phosphatase 2A 56 kDa regulatory subunit alpha isoform	86743.5	116226	117156	127113	0.0102516	0.0308505	0.0447908	0.0391908	0.00983294	0.999827	0.821341	0.857402	0.746333	0.740409	0.682411	0.992063	0.914352	0.921667
O94955	RHBT3_HUMAN	RHOBTB3	Rho-related BTB domain-containing protein 3	32985	30454.1	23379.2	34080.5	0.0199539	0.0508385	0.905098	0.0392675	0.987839	0.122866	0.754583	0.0223543	1.08311	1.41087	0.967856	1.30261	0.893593	0.685999
Q16204	CCDC6_HUMAN	CCDC6	Coiled-coil domain-containing protein 6	1.31348e+06	1.40967e+06	1.44339e+06	1.59796e+06	0.000278203	0.00208699	0.142212	0.0394229	0.000151777	0.869866	0.00642361	0.0242867	0.931767	0.91	0.821976	0.976639	0.882169	0.90327
P02771	FETA_HUMAN	AFP	Alpha-fetoprotein	207564	150997	136567	107934	0.00382609	0.0146504	0.116034	0.0394288	0.0023147	0.918342	0.158466	0.39446	1.37462	1.51986	1.92305	1.10566	1.39897	1.26528
Q05086	UBE3A_HUMAN	UBE3A	Ubiquitin-protein ligase E3A	320303	339066	352253	370892	0.00316298	0.0126999	0.283399	0.0396772	0.00214687	0.629681	0.0559704	0.370696	0.944662	0.909299	0.863602	0.962565	0.914192	0.949745
Q9NWT1	PK1IP_HUMAN	PAK1IP1	p21-activated protein kinase-interacting protein 1	683133	633209	608979	494074	1.12232e-05	0.000194172	0.214325	0.0396815	8.16187e-06	0.739846	0.000124672	0.000577822	1.07884	1.12177	1.38265	1.03979	1.28161	1.23257
P63272	SPT4H_HUMAN	SUPT4H1	Transcription elongation factor SPT4	548228	635679	672920	613691	0.0521247	0.104823	0.162911	0.0397962	0.381224	0.833454	0.932724	0.503579	0.86243	0.814701	0.893329	0.944658	1.03583	1.09651
Q96FZ2	HMCES_HUMAN	HMCES	Abasic site processing protein HMCES	69175	92774	99543.1	149289	0.000399075	0.00271353	0.120297	0.0400051	0.000210541	0.913594	0.011337	0.0353614	0.745629	0.694925	0.463365	0.931998	0.621441	0.666783
Q8NB50	ZFP62_HUMAN	ZFP62	Zinc finger protein 62 homolog	137523	205570	196998	219430	0.00784631	0.0251729	0.0256794	0.0400451	0.00805061	0.993907	0.90878	0.795973	0.668982	0.698092	0.626725	1.04351	0.936834	0.897768
O15182	CETN3_HUMAN	CETN3	Centrin-3	35667.2	39539.7	62221.7	54104.9	0.0254504	0.0607227	0.979835	0.0400678	0.152763	0.0774815	0.272588	0.854192	0.902062	0.573229	0.659224	0.635464	0.730797	1.15002
P04406	G3P_HUMAN	GAPDH	Glyceraldehyde-3-phosphate dehydrogenase	8.02279e+07	8.64666e+07	1.43818e+08	1.27623e+08	0.015042	0.0413357	1	0.0404027	0.115825	0.0411405	0.117812	0.923399	0.927849	0.557843	0.628635	0.601221	0.677518	1.1269
O95633	FSTL3_HUMAN	FSTL3	Follistatin-related protein 3	109976	134700	132197	117080	0.0152335	0.0417373	0.0267828	0.0406237	0.75459	0.994953	0.145061	0.210079	0.816451	0.831914	0.939324	1.01894	1.1505	1.12911
Q5T5P2	SKT_HUMAN	KIAA1217	Sickle tail protein homolog	113959	125348	138813	143517	0.0149576	0.0411382	0.467987	0.0409632	0.0172264	0.421937	0.213952	0.958629	0.909141	0.820949	0.794042	0.902994	0.873398	0.967224
Q9Y5Q9	TF3C3_HUMAN	GTF3C3	General transcription factor 3C polypeptide 3	378840	387754	410559	400059	0.0439425	0.0921079	0.823844	0.0409937	0.214801	0.172605	0.629083	0.749346	0.977011	0.922742	0.946962	0.944454	0.969244	1.02625
O60925	PFD1_HUMAN	PFDN1	Prefoldin subunit 1	837265	894005	1.03339e+06	1.01812e+06	0.0260042	0.0617319	0.791315	0.0410947	0.0660346	0.191119	0.28642	0.992323	0.936533	0.81021	0.822367	0.865116	0.878097	1.015
P49821	NDUV1_HUMAN	NDUFV1	NADH dehydrogenase [ubiquinone] flavoprotein 1, mitochondrial	683531	623766	641521	628397	0.00325987	0.0130045	0.00394995	0.0412829	0.00741882	0.551534	0.982325	0.761827	1.09581	1.06548	1.08774	0.972324	0.992629	1.02088
Q9BVW5	TIPIN_HUMAN	TIPIN	TIMELESS-interacting protein	45535.1	85867.1	79040.5	103119	0.00487881	0.0176101	0.0230834	0.0412832	0.00398273	0.986655	0.745912	0.554324	0.530298	0.576099	0.44158	1.08637	0.832702	0.766501
P09914	IFIT1_HUMAN	IFIT1	Interferon-induced protein with tetratricopeptide repeats 1	1.34575e+06	1.19606e+06	1.12564e+06	167646	2.76729e-13	1.8289e-10	0.228325	0.041358	9.74776e-13	0.729454	1.43885e-12	1.75815e-12	1.12514	1.19553	8.02729	1.06256	7.13446	6.7144
O95571	ETHE1_HUMAN	ETHE1	Persulfide dioxygenase ETHE1, mitochondrial	757057	780897	871518	663093	0.000634017	0.00384072	0.907361	0.0413738	0.0586683	0.127714	0.0183472	0.000336118	0.969471	0.868665	1.14171	0.89602	1.17766	1.31432
Q13464	ROCK1_HUMAN	ROCK1	Rho-associated protein kinase 1	244739	261996	270520	281084	0.0073014	0.0237922	0.215769	0.041419	0.00528839	0.750958	0.183125	0.649644	0.93413	0.904699	0.870695	0.968494	0.932092	0.962414
P61978	HNRPK_HUMAN	HNRNPK	Heterogeneous nuclear ribonucleoprotein K	1.60288e+07	1.65331e+07	1.98213e+07	1.64912e+07	0.0377138	0.0818827	0.958506	0.0415073	0.958052	0.0966771	1	0.0969902	0.969497	0.808666	0.971963	0.834108	1.00254	1.20193
Q8TAG9	EXOC6_HUMAN	EXOC6	Exocyst complex component 6	30484.6	38633.3	46552.3	43812.6	0.0433593	0.0910007	0.286083	0.0415164	0.0891175	0.640977	0.87552	0.968985	0.789075	0.654846	0.695795	0.829891	0.881786	1.06253
Q9H4A3	WNK1_HUMAN	WNK1	Serine/threonine-protein kinase WNK1	517141	544908	573872	627947	0.000721401	0.00424401	0.434037	0.0416038	0.000521178	0.460223	0.00686366	0.0945281	0.949043	0.901144	0.823543	0.949529	0.867761	0.913886
Q99685	MGLL_HUMAN	MGLL	Monoglyceride lipase	123583	173249	171881	154547	0.0322577	0.0725881	0.0475773	0.041608	0.222251	0.999824	0.783247	0.741486	0.713326	0.719004	0.799647	1.00796	1.12101	1.11216
Q9UPZ3	HPS5_HUMAN	HPS5	Hermansky-Pudlak syndrome 5 protein	32619.1	34666.1	46691.9	38482	0.0430931	0.0905572	0.96929	0.0416235	0.567746	0.0891057	0.817135	0.340439	0.940951	0.698603	0.847647	0.742444	0.900841	1.21335
Q6NW29	RWDD4_HUMAN	RWDD4	RWD domain-containing protein 4	157455	178382	194363	192921	0.0329719	0.0737683	0.284788	0.0416898	0.0500602	0.64426	0.705266	0.999553	0.882686	0.810109	0.816164	0.917777	0.924637	1.00747
Q5SY16	NOL9_HUMAN	NOL9	Polynucleotide 5'-hydroxyl-kinase NOL9	381008	446951	439726	417059	0.0202372	0.0514019	0.0219094	0.0417759	0.2755	0.981962	0.4486	0.65863	0.852459	0.866465	0.913559	1.01643	1.07167	1.05435
Q8NF64	ZMIZ2_HUMAN	ZMIZ2	Zinc finger MIZ domain-containing protein 2	50599.3	29560.7	130083	111656	0.00429911	0.0159802	0.663239	0.0417798	0.190932	0.00555275	0.0274646	0.796563	1.71171	0.388976	0.453172	0.227245	0.264749	1.16504
Q8N573	OXR1_HUMAN	OXR1	Oxidation resistance protein 1	21315.5	37506.5	39551.1	53940.3	0.00588685	0.0201709	0.0807332	0.0418503	0.00387002	0.979938	0.340872	0.540143	0.568315	0.538936	0.395169	0.948305	0.695334	0.733239
P06756	ITAV_HUMAN	ITGAV	Integrin alpha-V	493805	517144	540519	510167	0.0609052	0.118007	0.425511	0.0419337	0.675437	0.471551	0.969843	0.265177	0.954869	0.913576	0.967928	0.956755	1.01368	1.05949
Q9UJJ9	GNPTG_HUMAN	GNPTG	N-acetylglucosamine-1-phosphotransferase subunit gamma	44863.8	58100.8	57707.1	61154.3	0.0110221	0.032593	0.0336763	0.0419418	0.0122972	0.999242	0.937589	0.894585	0.772172	0.77744	0.733616	1.00682	0.950068	0.94363
P31930	QCR1_HUMAN	UQCRC1	Cytochrome b-c1 complex subunit 1, mitochondrial	3.12043e+06	3.14489e+06	3.83825e+06	3.33546e+06	0.0294856	0.0678281	0.99999	0.0419634	0.759323	0.0398645	0.743158	0.213252	0.992222	0.812983	0.935531	0.819356	0.942865	1.15074
O75054	IGSF3_HUMAN	IGSF3	Immunoglobulin superfamily member 3	296210	335670	375882	319494	0.0590826	0.115416	0.372625	0.0420176	0.697425	0.531252	0.934216	0.25139	0.882446	0.788042	0.927122	0.89302	1.05063	1.17649
Q02252	MMSA_HUMAN	ALDH6A1	Methylmalonate-semialdehyde dehydrogenase [acylating], mitochondrial	235850	212629	216152	205830	0.00277814	0.0115042	0.0139276	0.0423286	0.00216315	0.918532	0.704361	0.355266	1.10921	1.09113	1.14585	0.983698	1.03303	1.05015
P46781	RS9_HUMAN	RPS9	40S ribosomal protein S9	1.16183e+07	1.11651e+07	1.0817e+07	1.01366e+07	0.000548026	0.00345602	0.36495	0.0423502	0.000369427	0.543032	0.00593059	0.0637531	1.04059	1.07407	1.14617	1.03218	1.10146	1.06713
O43660	PLRG1_HUMAN	PLRG1	Pleiotropic regulator 1	487927	550379	590678	558817	0.0565755	0.111681	0.308149	0.0423763	0.181039	0.61663	0.982818	0.818117	0.886529	0.826046	0.873143	0.931775	0.9849	1.05701
Q562F6	SGO2_HUMAN	SGO2	Shugoshin 2	33533.4	23409.4	17561.3	16132.3	0.0255225	0.0608287	0.35318	0.0425605	0.0329425	0.5591	0.476237	0.998798	1.43248	1.9095	2.07865	1.33301	1.45109	1.08858
O75925	PIAS1_HUMAN	PIAS1	E3 SUMO-protein ligase PIAS1	42597.8	66736.4	90902.4	96508.4	0.0186262	0.0484839	0.401671	0.0426088	0.0212932	0.502418	0.305716	0.977818	0.6383	0.46861	0.44139	0.734154	0.691509	0.941913
Q7Z7G8	VP13B_HUMAN	VPS13B	Intermembrane lipid transfer protein VPS13B	66539.4	129976	133551	131795	0.0244307	0.0588623	0.0498954	0.0426624	0.0495108	0.999719	1	0.999759	0.511937	0.498232	0.504872	0.973228	0.986198	1.01333
Q9UBR2	CATZ_HUMAN	CTSZ	Cathepsin Z	2.25624e+06	2.50694e+06	2.52917e+06	2.76304e+06	0.00140218	0.00695721	0.0648656	0.0426913	0.000728384	0.994687	0.0877394	0.130867	0.899998	0.892085	0.816579	0.991208	0.907312	0.91536
Q8N584	TT39C_HUMAN	TTC39C	Tetratricopeptide repeat protein 39C	81447.5	106247	97222.2	141789	6.25916e-06	0.000124599	0.00302314	0.0428827	3.52088e-06	0.45155	0.00196904	0.000180127	0.766586	0.837746	0.574426	1.09283	0.749331	0.685681
P40926	MDHM_HUMAN	MDH2	Malate dehydrogenase, mitochondrial	7.9997e+06	7.84e+06	9.83189e+06	7.0734e+06	0.00338494	0.0133718	0.994284	0.043015	0.361852	0.0278652	0.490055	0.00224891	1.02037	0.813648	1.13096	0.797405	1.10838	1.38998
Q8NDD1	CA131_HUMAN	C1orf131	Uncharacterized protein C1orf131	214270	233571	244802	209154	0.0123	0.03539	0.25015	0.0430161	0.954397	0.707089	0.112676	0.0175451	0.917365	0.875281	1.02446	0.954125	1.11675	1.17044
P48163	MAOX_HUMAN	ME1	NADP-dependent malic enzyme	623711	733534	725258	786481	0.00312834	0.0126134	0.0246786	0.0431073	0.00209313	0.988136	0.504651	0.341348	0.850283	0.859986	0.79304	1.01141	0.932678	0.922155
O60930	RNH1_HUMAN	RNASEH1	Ribonuclease H1	38720.2	45654	57442.9	48237.5	0.0587799	0.11507	0.721567	0.0431699	0.347081	0.241722	0.90136	0.571474	0.848124	0.674065	0.8027	0.794772	0.946442	1.19084
P05388	RLA0_HUMAN	RPLP0	60S acidic ribosomal protein P0	5.15511e+06	5.36968e+06	5.93761e+06	5.2595e+06	0.0431354	0.0906173	0.853615	0.0432272	0.96863	0.163983	0.984531	0.0929283	0.96004	0.868213	0.980152	0.90435	1.02095	1.12893
Q9H6T0	ESRP2_HUMAN	ESRP2	Epithelial splicing regulatory protein 2	216373	237750	254085	295669	0.000576454	0.00357668	0.325965	0.0432649	0.00037323	0.599522	0.0069519	0.0631444	0.910087	0.851576	0.731807	0.935708	0.804107	0.859356
P00403	COX2_HUMAN	MT-CO2	Cytochrome c oxidase subunit 2	4.68206e+06	3.49516e+06	3.49184e+06	3.04763e+06	0.00601957	0.0204963	0.041503	0.0434155	0.00439805	0.999993	0.586211	0.571149	1.33958	1.34086	1.5363	1.00095	1.14685	1.14576
P33991	MCM4_HUMAN	MCM4	DNA replication licensing factor MCM4	1.81949e+06	1.84975e+06	1.99288e+06	1.98408e+06	0.0183479	0.0480182	0.95078	0.0434792	0.0592943	0.106475	0.142587	0.997816	0.983643	0.912994	0.917046	0.928176	0.932296	1.00444
Q6NUS6	TECT3_HUMAN	TCTN3	Tectonic-3	38222.2	37899.1	59368	67991.5	0.00326965	0.0130175	0.998905	0.0434863	0.00919354	0.0556325	0.0117896	0.810655	1.00853	0.643819	0.562161	0.638376	0.557409	0.873167
Q9Y376	CAB39_HUMAN	CAB39	Calcium-binding protein 39	359722	409021	419036	431121	0.016613	0.0444696	0.0975648	0.0435365	0.0161281	0.963439	0.729206	0.939725	0.879471	0.858452	0.834388	0.9761	0.948739	0.971969
Q8N302	AGGF1_HUMAN	AGGF1	Angiogenic factor with G patch and FHA domains 1	57357.4	83624.7	86839.9	83499	0.0323446	0.0727093	0.0683813	0.0435522	0.078267	0.993336	0.999808	0.985559	0.685891	0.660496	0.686923	0.962975	1.0015	1.04001
Q7Z6I8	CE024_HUMAN	C5orf24	UPF0461 protein C5orf24	97114.5	109998	135173	150195	0.00639813	0.0214864	0.584957	0.0435813	0.00645075	0.338992	0.0612023	0.699346	0.882877	0.718446	0.646588	0.813756	0.732365	0.899981
P35914	HMGCL_HUMAN	HMGCL	Hydroxymethylglutaryl-CoA lyase, mitochondrial	150597	153822	178696	150616	0.0300093	0.068698	0.967213	0.0438507	0.999903	0.0953355	0.978575	0.0489432	0.979037	0.842756	0.999878	0.860801	1.02129	1.18644
Q8WVX9	FACR1_HUMAN	FAR1	Fatty acyl-CoA reductase 1	204388	211014	253544	229378	0.0399065	0.0854086	0.980196	0.0440388	0.382631	0.0845763	0.59039	0.534891	0.968601	0.806125	0.891057	0.832257	0.919942	1.10536
P17612	KAPCA_HUMAN	PRKACA	cAMP-dependent protein kinase catalytic subunit alpha	1.36985e+06	1.49977e+06	1.60491e+06	1.77484e+06	0.00246938	0.0105223	0.336864	0.0440898	0.00168164	0.591596	0.0348453	0.279719	0.913374	0.853539	0.771818	0.93449	0.845019	0.904257
Q96MU7	YTDC1_HUMAN	YTHDC1	YTH domain-containing protein 1	643991	590911	591993	525727	9.56704e-05	0.000946535	0.0409794	0.0441546	4.78892e-05	0.99997	0.00555581	0.00516012	1.08983	1.08784	1.22495	0.998172	1.12399	1.12605
P04004	VTNC_HUMAN	VTN	Vitronectin	502883	253725	279929	192050	0.00151331	0.00733785	0.015485	0.0442975	0.000939029	0.929734	0.386172	0.163034	1.982	1.79646	2.61849	0.906388	1.32114	1.45758
O94925	GLSK_HUMAN	GLS	Glutaminase kidney isoform, mitochondrial	2.76719e+06	3.07711e+06	3.40293e+06	2.24447e+06	0.000375325	0.00261108	0.513006	0.0444159	0.0412715	0.404212	0.00351973	0.000262883	0.899284	0.813181	1.23289	0.904253	1.37097	1.51614
Q9Y2Z9	COQ6_HUMAN	COQ6	Ubiquinone biosynthesis monooxygenase COQ6, mitochondrial	74200.4	73871.9	107492	87863	0.0326552	0.0732333	0.999908	0.0445346	0.521068	0.0495974	0.556607	0.397822	1.00445	0.690287	0.8445	0.687232	0.840762	1.2234
Q8NI08	NCOA7_HUMAN	NCOA7	Nuclear receptor coactivator 7	69824.6	85663.2	97285	82888.2	0.0652732	0.124428	0.275553	0.0445497	0.38824	0.680012	0.99387	0.532156	0.815107	0.717733	0.842395	0.880538	1.03348	1.17369
P42575	CASP2_HUMAN	CASP2	Caspase-2	142816	180941	253350	323592	0.00457862	0.0167739	0.631352	0.0448067	0.00456076	0.311093	0.0376416	0.572922	0.789294	0.56371	0.441346	0.714195	0.559165	0.78293
P45880	VDAC2_HUMAN	VDAC2	Voltage-dependent anion-selective channel protein 2	5.29947e+06	5.51667e+06	6.64058e+06	4.70045e+06	0.00625714	0.0210879	0.920067	0.0449705	0.532058	0.13015	0.23613	0.00405402	0.960628	0.798043	1.12744	0.830751	1.17365	1.41276
P08397	HEM3_HUMAN	HMBS	Porphobilinogen deaminase	391003	464932	489963	494968	0.0302839	0.069183	0.155686	0.0450113	0.0406278	0.878045	0.852385	0.999922	0.840989	0.798024	0.789956	0.948912	0.939318	0.98989
Q8TEU7	RPGF6_HUMAN	RAPGEF6	Rap guanine nucleotide exchange factor 6	52437.3	62004.2	68479	71901.4	0.016745	0.0447143	0.298758	0.0450167	0.0160726	0.650047	0.333434	0.933429	0.845707	0.765743	0.729295	0.905448	0.86235	0.952402
Q9NTM9	CUTC_HUMAN	CUTC	Copper homeostasis protein cutC homolog	326824	374891	379758	374567	0.0337148	0.0750336	0.0756494	0.045051	0.0759194	0.989904	1	0.989697	0.871784	0.860613	0.872539	0.987186	1.00087	1.01386
O15013	ARHGA_HUMAN	ARHGEF10	Rho guanine nucleotide exchange factor 10	233612	243375	257158	253803	0.040468	0.0864424	0.575407	0.0452316	0.088474	0.35639	0.565131	0.978446	0.959884	0.908437	0.920443	0.946403	0.958911	1.01322
Q96S94	CCNL2_HUMAN	CCNL2	Cyclin-L2	27156	29054	58016	44931.8	0.0308665	0.0701624	0.978635	0.0453434	0.18065	0.0885064	0.319835	0.837633	0.934673	0.468077	0.604382	0.500792	0.646624	1.2912
Q00403	TF2B_HUMAN	GTF2B	Transcription initiation factor IIB	374305	392421	423320	496387	8.3474e-05	0.000846163	0.697054	0.0457774	8.05848e-05	0.270141	0.000402932	0.0095908	0.953836	0.884214	0.754059	0.927008	0.790554	0.852802
P61009	SPCS3_HUMAN	SPCS3	Signal peptidase complex subunit 3	3.56526e+06	3.12891e+06	3.11385e+06	2.69594e+06	0.000429216	0.00288574	0.0498213	0.0457888	0.000210495	0.999956	0.0283365	0.0308614	1.13946	1.14497	1.32246	1.00484	1.1606	1.15501
Q96S66	CLCC1_HUMAN	CLCC1	Chloride channel CLIC-like protein 1	453235	504277	655066	686168	0.0112428	0.0331122	0.82244	0.0458977	0.0183281	0.191706	0.0820371	0.951263	0.898781	0.691892	0.660531	0.769811	0.734918	0.954673
Q69YQ0	CYTSA_HUMAN	SPECC1L	Cytospin-A	298993	339929	339356	310905	0.022537	0.0554949	0.0444843	0.0460112	0.773725	0.999997	0.215449	0.221809	0.879574	0.881061	0.961686	1.00169	1.09335	1.09151
P49257	LMAN1_HUMAN	LMAN1	Protein ERGIC-53	1.50455e+06	1.58694e+06	1.66525e+06	1.51037e+06	0.0337672	0.0751153	0.426213	0.0460226	0.999374	0.500373	0.489616	0.0564347	0.948083	0.903495	0.996146	0.952971	1.0507	1.10255
Q06830	PRDX1_HUMAN	PRDX1	Peroxiredoxin-1	4.03272e+07	4.37346e+07	4.94836e+07	5.0194e+07	0.0205865	0.0520889	0.634237	0.0460744	0.0306707	0.315874	0.226363	0.995252	0.922089	0.814962	0.803427	0.883821	0.871311	0.985845
Q15024	EXOS7_HUMAN	EXOSC7	Exosome complex component RRP42	954744	1.09102e+06	1.08031e+06	996761	0.0183599	0.0480182	0.0297089	0.0461713	0.721857	0.993993	0.174747	0.255542	0.875093	0.883769	0.957846	1.00991	1.09457	1.08382
Q5BJH7	YIF1B_HUMAN	YIF1B	Protein YIF1B	260418	211123	208522	194318	0.0121542	0.0350928	0.0643514	0.0463563	0.0106306	0.997401	0.73399	0.83338	1.23349	1.24887	1.34016	1.01247	1.08648	1.0731
P23193	TCEA1_HUMAN	TCEA1	Transcription elongation factor A protein 1	1.29952e+06	1.43052e+06	1.53425e+06	1.4172e+06	0.0704314	0.132086	0.366591	0.0463598	0.431625	0.571096	0.999162	0.496923	0.908425	0.847008	0.916963	0.932392	1.0094	1.08259
Q7KZI7	MARK2_HUMAN	MARK2	Serine/threonine-protein kinase MARK2	248720	215493	205643	183750	0.00394627	0.0149632	0.16289	0.0466467	0.00237527	0.874648	0.115646	0.355281	1.15419	1.20948	1.35357	1.0479	1.17275	1.11914
Q9Y421	FA32A_HUMAN	FAM32A	Protein FAM32A	61082.1	121950	159805	152101	0.0391017	0.0840685	0.298127	0.047277	0.0604626	0.667374	0.748373	0.998899	0.500876	0.382229	0.401588	0.763121	0.801771	1.05065
Q7L5Y1	ENOF1_HUMAN	ENOSF1	Mitochondrial enolase superfamily member 1	366120	412363	517353	557122	0.0101072	0.0305155	0.833153	0.0475113	0.0159311	0.191058	0.0690162	0.921914	0.887858	0.707679	0.657162	0.797063	0.740166	0.928617
Q9UHF7	TRPS1_HUMAN	TRPS1	Zinc finger transcription factor Trps1	143322	152498	177253	197308	0.00253777	0.0107102	0.798928	0.0476098	0.00290068	0.212557	0.0139647	0.407419	0.939825	0.808573	0.726387	0.860344	0.772896	0.898356
P13073	COX41_HUMAN	COX4I1	Cytochrome c oxidase subunit 4 isoform 1, mitochondrial	3.63524e+06	4.23857e+06	4.64384e+06	4.20304e+06	0.070251	0.1319	0.341156	0.0476601	0.321187	0.612271	0.999965	0.638487	0.857658	0.78281	0.864908	0.912729	1.00845	1.10488
P40925	MDHC_HUMAN	MDH1	Malate dehydrogenase, cytoplasmic	5.12404e+06	5.5308e+06	5.79142e+06	6.23471e+06	0.00324231	0.0129633	0.289351	0.0476645	0.00211923	0.682504	0.0538355	0.318917	0.926455	0.884763	0.821857	0.954998	0.887099	0.928901
Q8NG31	KNL1_HUMAN	KNL1	Kinetochore scaffold 1	84279.1	100400	106039	120217	0.00484386	0.0175318	0.14479	0.0476702	0.00295815	0.908668	0.160762	0.412956	0.839434	0.794792	0.701058	0.946818	0.835155	0.882065
Q12800	TFCP2_HUMAN	TFCP2	Alpha-globin transcription factor CP2	232137	286829	302438	268883	0.0554895	0.110162	0.133106	0.047682	0.38404	0.926602	0.885509	0.55956	0.809324	0.767554	0.863341	0.948389	1.06674	1.1248
Q969Q0	RL36L_HUMAN	RPL36AL	60S ribosomal protein L36a-like	4.70379e+06	3.38893e+06	3.56255e+06	3.45767e+06	0.0131927	0.0372927	0.0198324	0.0478384	0.0253767	0.95647	0.99895	0.982743	1.38798	1.32034	1.36039	0.951266	0.980121	1.03033
Q15369	ELOC_HUMAN	ELOC	Elongin-C	303906	339348	401777	421104	0.0161023	0.043419	0.63128	0.0479262	0.0209461	0.328018	0.163582	0.963324	0.895558	0.756404	0.721689	0.844618	0.805854	0.954105
P62857	RS28_HUMAN	RPS28	40S ribosomal protein S28	9.81653e+06	1.21866e+07	1.27102e+07	1.17948e+07	0.0527471	0.105765	0.115053	0.0479353	0.264012	0.9531	0.9481	0.721289	0.805519	0.772333	0.832277	0.958802	1.03322	1.07761
P25054	APC_HUMAN	APC	Adenomatous polyposis coli protein	59452.8	68960.1	85705.4	110278	0.00246746	0.0105223	0.529982	0.0479643	0.00200144	0.411487	0.0217577	0.302726	0.862133	0.693687	0.539118	0.804617	0.625331	0.777178
P20810	ICAL_HUMAN	CAST	Calpastatin	1.63614e+06	2.00862e+06	1.90049e+06	1.97014e+06	0.00588659	0.0201709	0.00697225	0.047977	0.0134735	0.693328	0.980685	0.884541	0.814558	0.860904	0.830469	1.0569	1.01953	0.964648
P18827	SDC1_HUMAN	SDC1	Syndecan-1	270373	255721	350589	812582	4.19174e-08	2.58908e-06	0.940695	0.0479787	1.22372e-07	0.0179007	7.50058e-08	2.28611e-06	1.0573	0.771196	0.332733	0.729404	0.314702	0.43145
Q5J8M3	EMC4_HUMAN	EMC4	ER membrane protein complex subunit 4	497330	429761	426963	436581	0.0333447	0.074426	0.0567431	0.0480894	0.0947569	0.999664	0.989863	0.977541	1.15722	1.16481	1.13915	1.00655	0.984377	0.977969
P09038	FGF2_HUMAN	FGF2	Fibroblast growth factor 2	1.07559e+06	869474	875172	481379	5.09542e-07	1.81052e-05	0.0431667	0.0482991	4.01094e-07	0.999896	1.08794e-05	1.00532e-05	1.23706	1.229	2.23439	0.99349	1.80621	1.81805
Q9Y4P3	TBL2_HUMAN	TBL2	Transducin beta-like protein 2	546152	629825	650887	618468	0.0515613	0.10396	0.116566	0.0483836	0.195131	0.952447	0.987496	0.831583	0.867149	0.839089	0.883073	0.967641	1.01836	1.05242
P61923	COPZ1_HUMAN	COPZ1	Coatomer subunit zeta-1	1.10233e+06	1.34667e+06	1.51621e+06	1.55701e+06	0.0270709	0.0636043	0.353653	0.0484473	0.0324113	0.601913	0.470606	0.995404	0.818555	0.727028	0.707976	0.888185	0.864909	0.973794
P15336	ATF2_HUMAN	ATF2	Cyclic AMP-dependent transcription factor ATF-2	60556.5	95049.5	98090.2	121485	0.00881701	0.0276038	0.0641051	0.0484566	0.00655585	0.998375	0.574656	0.669479	0.637104	0.617355	0.498468	0.969002	0.782397	0.807425
P25391	LAMA1_HUMAN	LAMA1	Laminin subunit alpha-1	75153.8	86161.6	90335.5	87641.5	0.0485562	0.0991681	0.167466	0.048494	0.105542	0.876647	0.991336	0.966552	0.872243	0.831942	0.857515	0.953796	0.983114	1.03074
Q04917	1433F_HUMAN	YWHAH	14-3-3 protein eta	2.07451e+06	2.31069e+06	2.44437e+06	2.47072e+06	0.0278254	0.0649357	0.250688	0.0485611	0.0318504	0.745489	0.606223	0.994706	0.897789	0.848691	0.83964	0.945312	0.935231	0.989336
O14880	MGST3_HUMAN	MGST3	Microsomal glutathione S-transferase 3	736890	833832	1.32651e+06	1.28114e+06	0.0173858	0.0460347	0.982899	0.0487301	0.0616042	0.0903578	0.113229	0.999043	0.88374	0.555512	0.575181	0.628592	0.650849	1.03541
P00813	ADA_HUMAN	ADA	Adenosine deaminase	28570.5	17448.4	10957.1	19233.4	0.069166	0.130257	0.333194	0.0489014	0.627173	0.631282	0.944629	0.336346	1.63743	2.60749	1.48546	1.59243	0.90719	0.56969
Q96T23	RSF1_HUMAN	RSF1	Remodeling and spacing factor 1	264049	301718	300431	292844	0.0313189	0.0709344	0.0409445	0.0489017	0.143168	0.999592	0.877298	0.916351	0.875151	0.878899	0.90167	1.00428	1.0303	1.02591
Q9NXH9	TRM1_HUMAN	TRMT1	tRNA (guanine(26)-N(2))-dimethyltransferase	481475	457215	444380	452583	0.0600713	0.116623	0.282012	0.0490899	0.157148	0.702777	0.978901	0.895748	1.05306	1.08348	1.06384	1.02888	1.01023	0.981874
O43237	DC1L2_HUMAN	DYNC1LI2	Cytoplasmic dynein 1 light intermediate chain 2	711459	791271	838936	766638	0.0686473	0.129626	0.267752	0.0491174	0.529062	0.723683	0.947763	0.419339	0.899134	0.848049	0.928025	0.943185	1.03213	1.0943
O60675	MAFK_HUMAN	MAFK	Transcription factor MafK	386804	374490	322646	199859	4.0473e-07	1.53728e-05	0.937729	0.049459	6.78497e-07	0.129913	1.21886e-06	1.92635e-05	1.03288	1.19885	1.93538	1.16068	1.87377	1.61437
Q96DG6	CMBL_HUMAN	CMBL	Carboxymethylenebutenolidase homolog	1.17242e+06	1.34203e+06	1.36244e+06	1.65023e+06	0.00016642	0.00142492	0.0749134	0.0495173	8.54271e-05	0.994748	0.00626448	0.00952954	0.873619	0.860531	0.71046	0.985019	0.813238	0.825606
Q06609	RAD51_HUMAN	RAD51	DNA repair protein RAD51 homolog 1	29370.1	38428.8	47268.4	40292.5	0.0697589	0.131163	0.408121	0.0495269	0.2515	0.544359	0.983446	0.750525	0.764274	0.621348	0.728923	0.812991	0.953745	1.17313
Q8TED0	UTP15_HUMAN	UTP15	U3 small nucleolar RNA-associated protein 15 homolog	504368	491982	462633	405601	3.44683e-05	0.000433622	0.821561	0.0495565	3.9284e-05	0.205639	0.000130478	0.00357879	1.02517	1.09021	1.24351	1.06344	1.21297	1.14061
[truncated: 4,865 more rows]

## Sheet: Complete_Results
Protein.Group	Protein.Names	Genes	First.Protein.Description	Ctrl_CIITA_1	Ctrl_CIITA_2	Ctrl_CIITA_3	Ctrl_CIITA_4	Ctrl_Ctrl_1	Ctrl_Ctrl_2	Ctrl_Ctrl_3	Ctrl_Ctrl_4	US28_CIITA_1	US28_CIITA_2	US28_CIITA_3	US28_CIITA_4	US28_Ctrl_1	US28_Ctrl_2	US28_Ctrl_3	US28_Ctrl_4	p	p_FDR	p_posthoc_US28_CIITA_vs_US28_Ctrl	p_posthoc_US28_CIITA_vs_Ctrl_CIITA	p_posthoc_US28_CIITA_vs_Ctrl_Ctrl	p_posthoc_US28_Ctrl_vs_Ctrl_CIITA	p_posthoc_US28_Ctrl_vs_Ctrl_Ctrl	p_posthoc_Ctrl_CIITA_vs_Ctrl_Ctrl	RoM_US28_CIITA_vs_US28_Ctrl	RoM_US28_CIITA_vs_Ctrl_CIITA	RoM_US28_CIITA_vs_Ctrl_Ctrl	RoM_US28_Ctrl_vs_Ctrl_CIITA	RoM_US28_Ctrl_vs_Ctrl_Ctrl	RoM_Ctrl_CIITA_vs_Ctrl_Ctrl
[truncated: 6,609 more rows]
