# Supplementary figures and images for: The human cytomegalovirus-encoded pUS28 antagonizes CD4+ T cell recognition by targeting CIITA
Source: eLife journal article supplement (doi:10.7554/elife.96414), 2025-06-03

Figure 3B

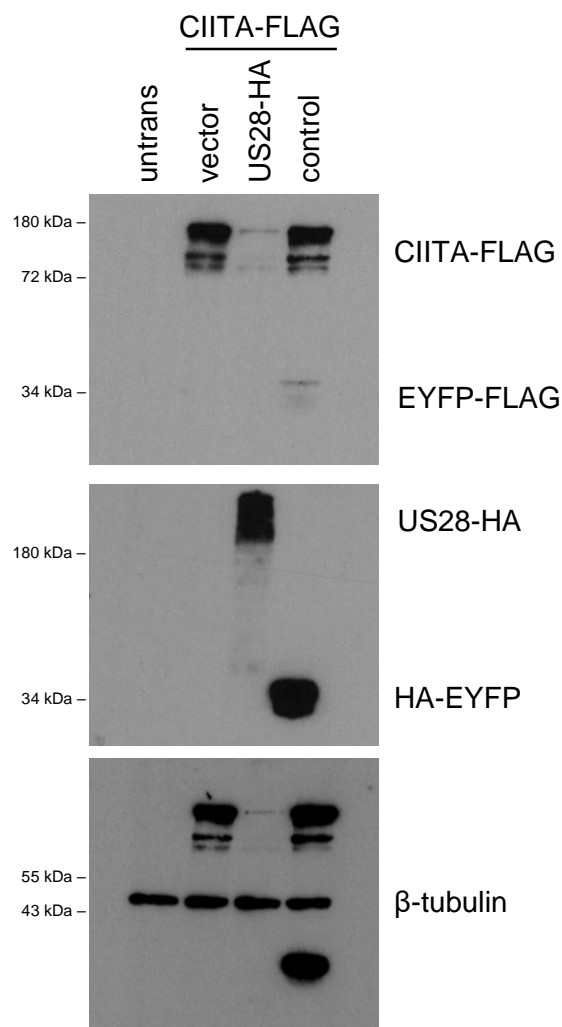

Supplement: fig3-data1 [file elife-96414-fig3-data1-v1.zip]

Figure 3D

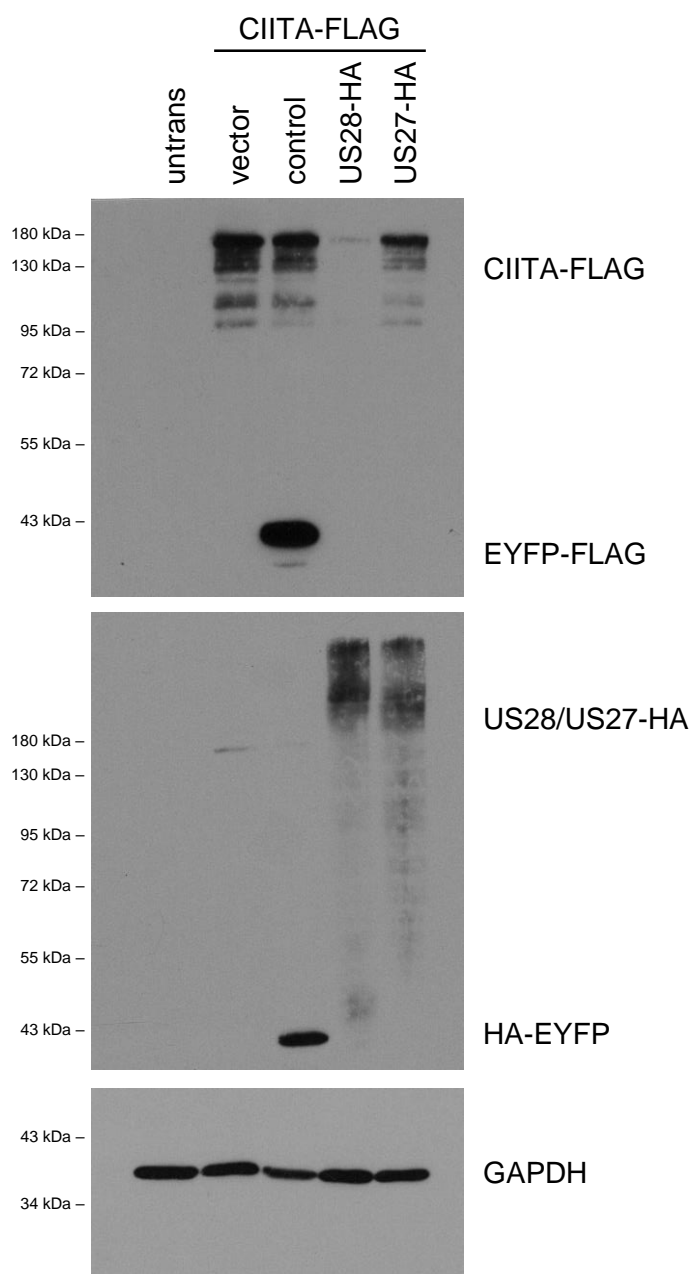

Supplement: fig3-data1 [file elife-96414-fig3-data1-v1.zip]

Figure 3A

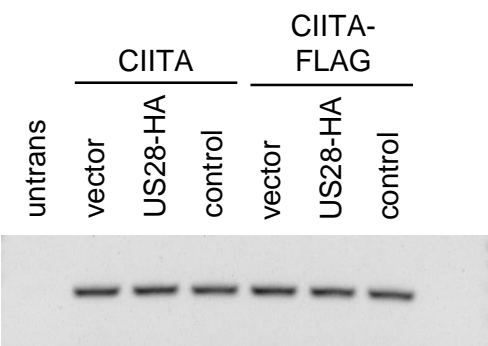

Supplement: fig3-data1 [file elife-96414-fig3-data1-v1.zip]

Figure 5D

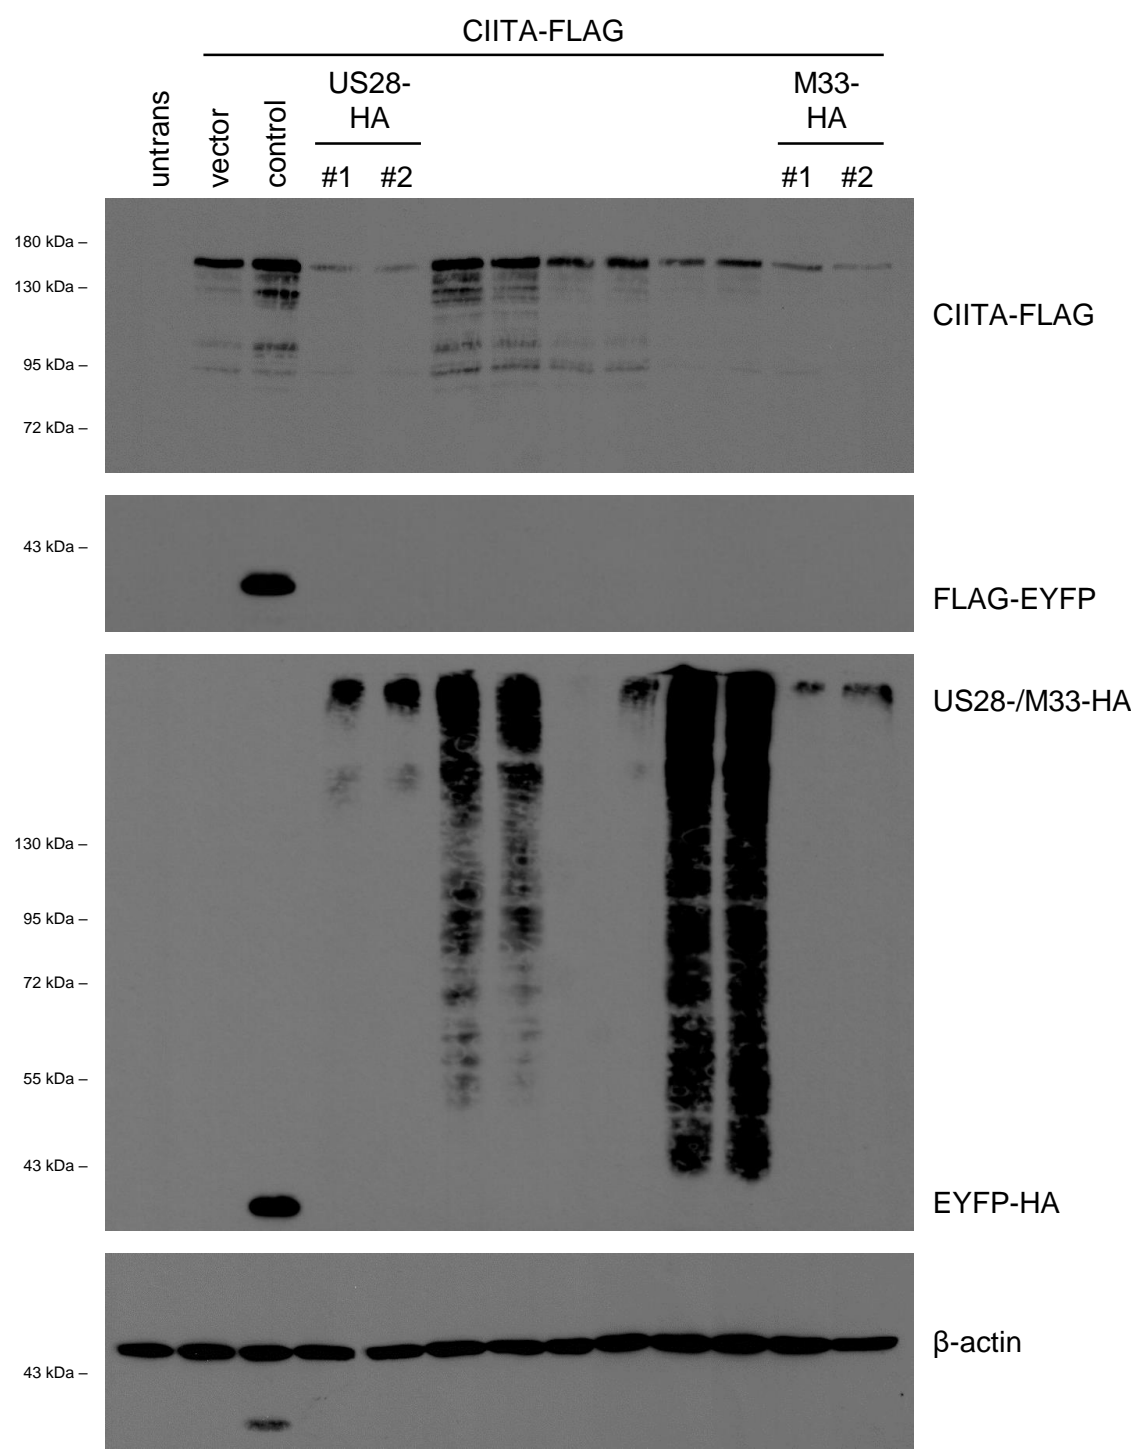

Supplement: fig5-data1 [file elife-96414-fig5-data1-v1.zip]

Figure 5E

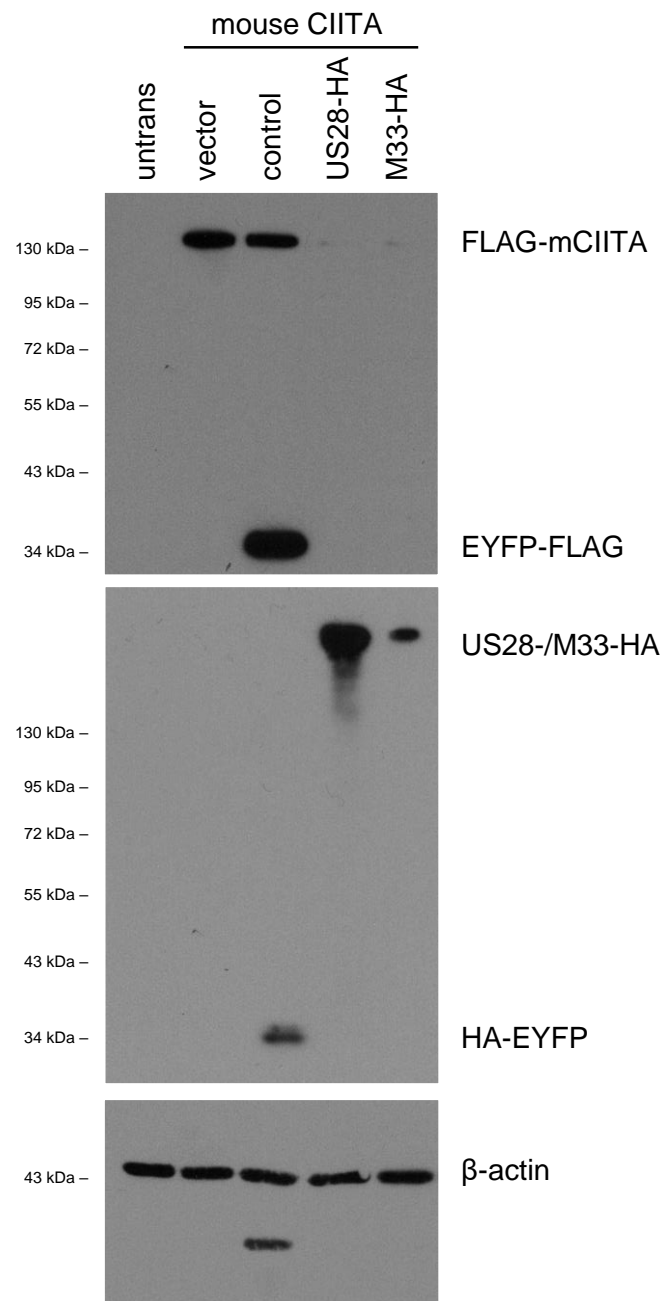

Supplement: fig5-data1 [file elife-96414-fig5-data1-v1.zip]

Figure 5A

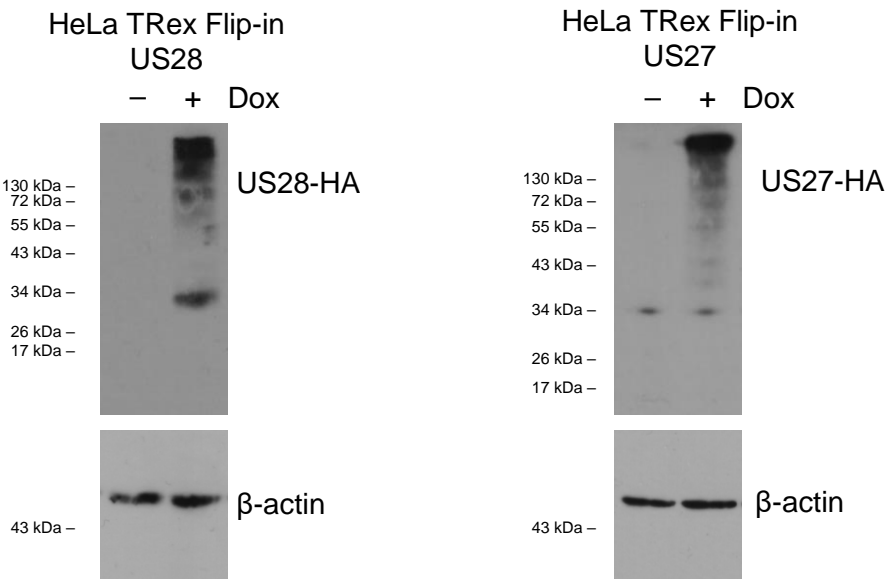

Supplement: fig5-data1 [file elife-96414-fig5-data1-v1.zip]

Figure 6A

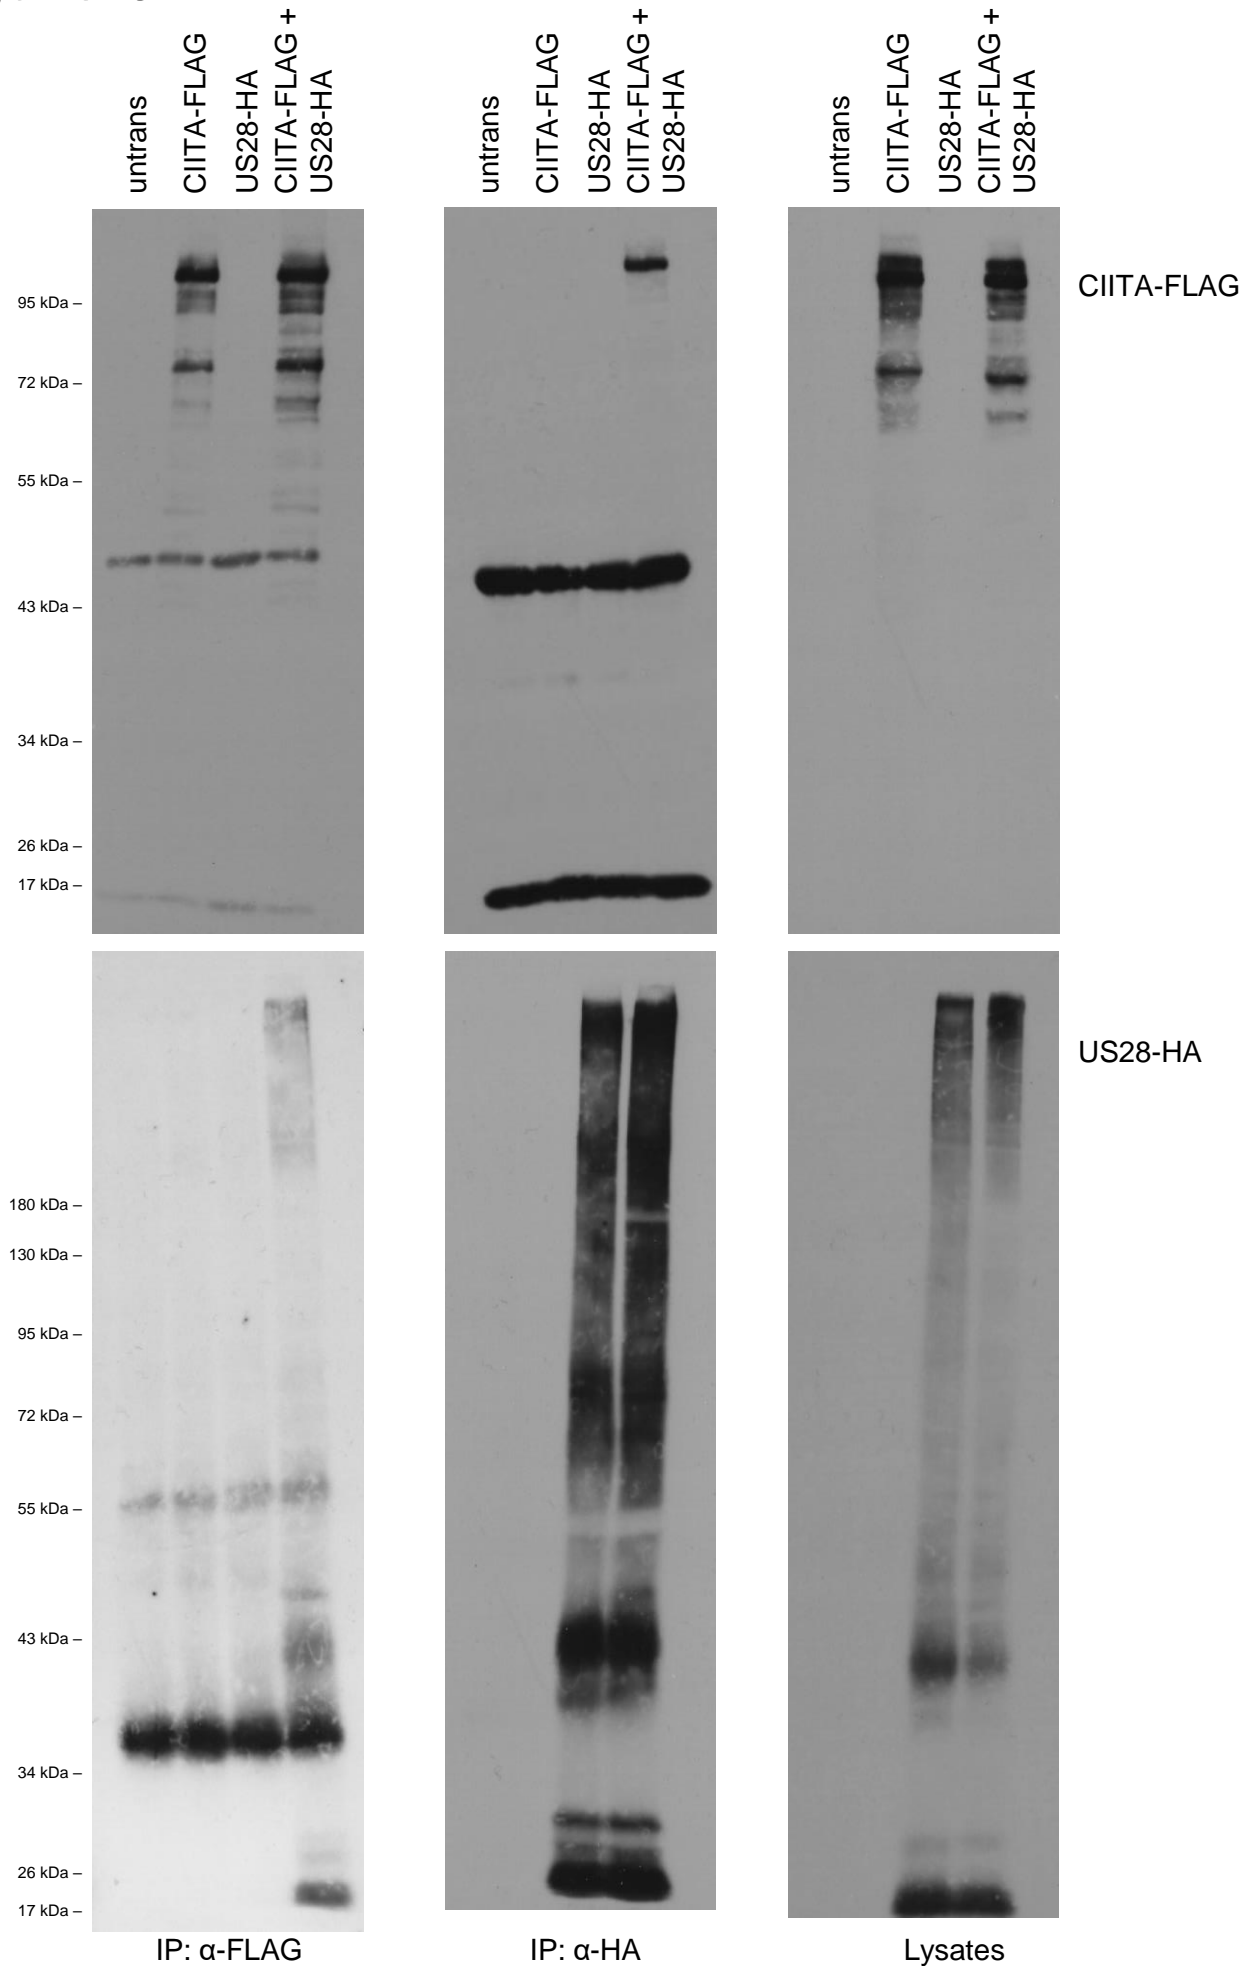

Supplement: fig6-data1 [file elife-96414-fig6-data1-v1.zip]

Figure 6B

Figure 6 – figure supplement 3

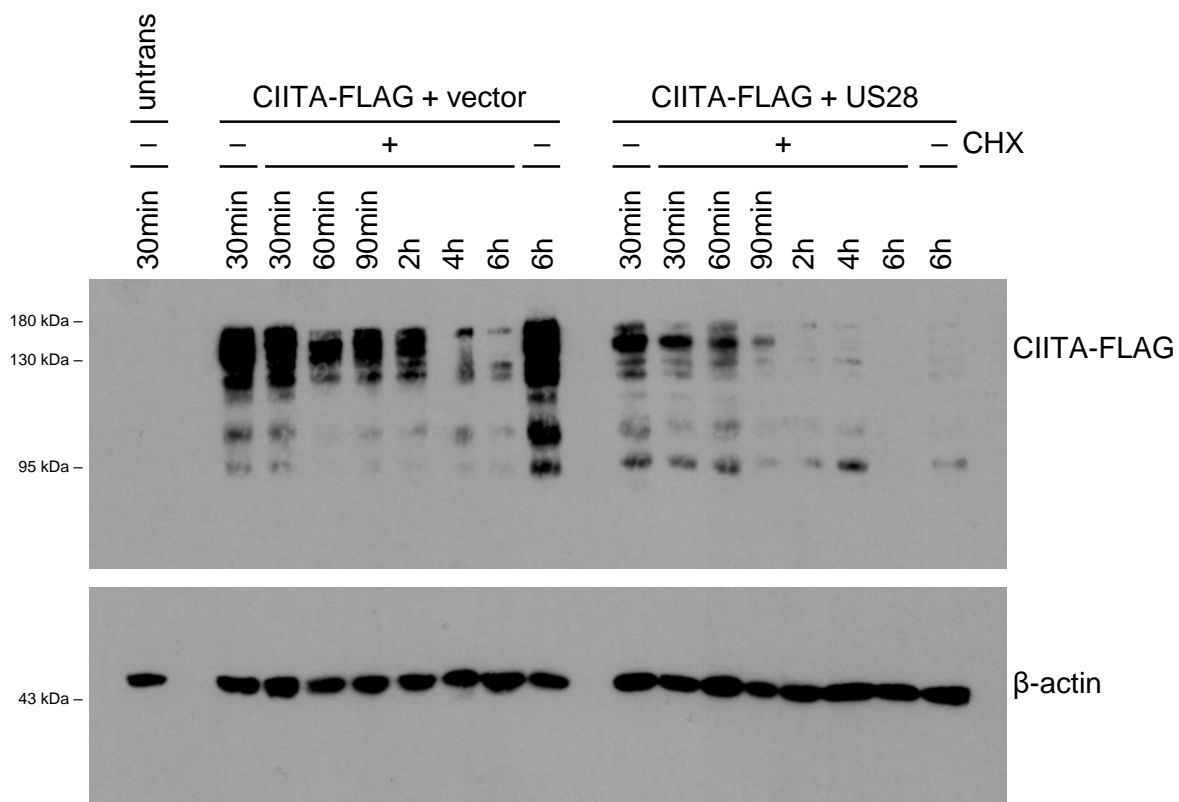

Supplement: fig6-data1 [file elife-96414-fig6-data1-v1.zip]

Figure 6 – figure supplement 1

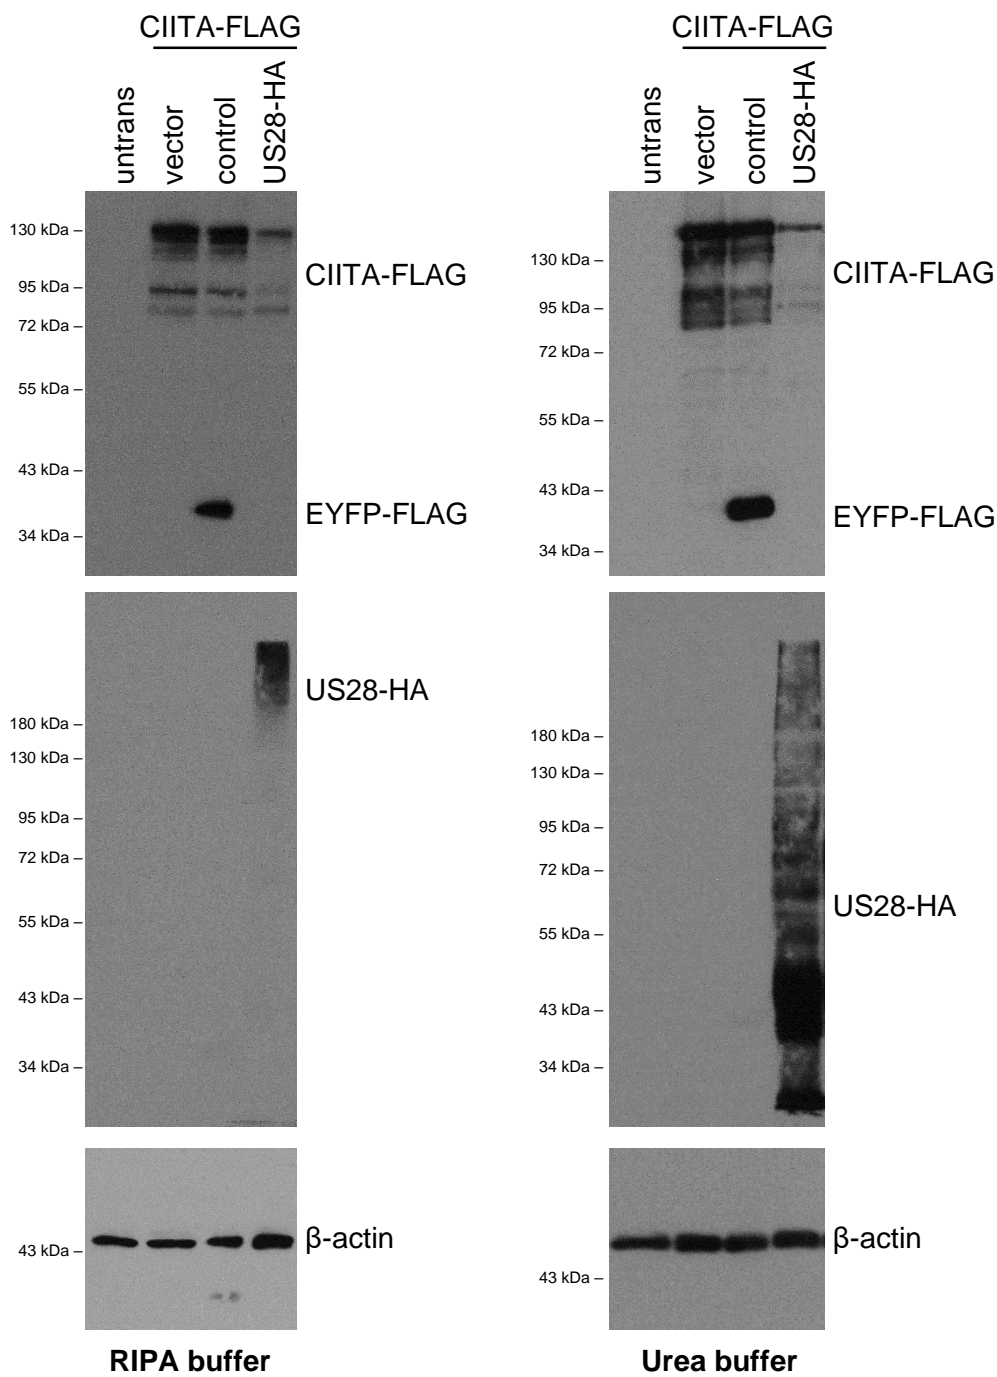

Supplement: fig6-figsupp1-data1 [file elife-96414-fig6-figsupp1-data1-v1.zip]

Figure 6 – figure supplement 2

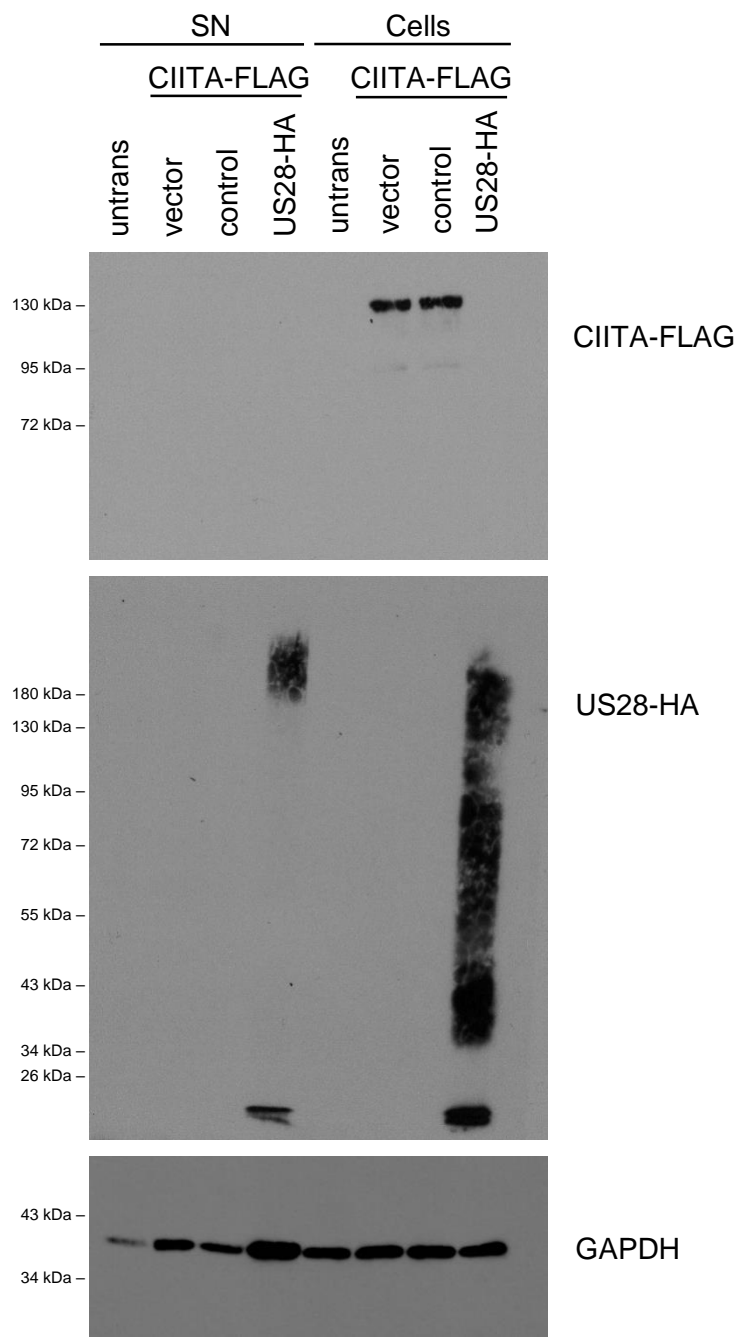

Supplement: fig6-figsupp2-data1 [file elife-96414-fig6-figsupp2-data1-v1.zip]

# Figure 6 – figure supplement 4 B

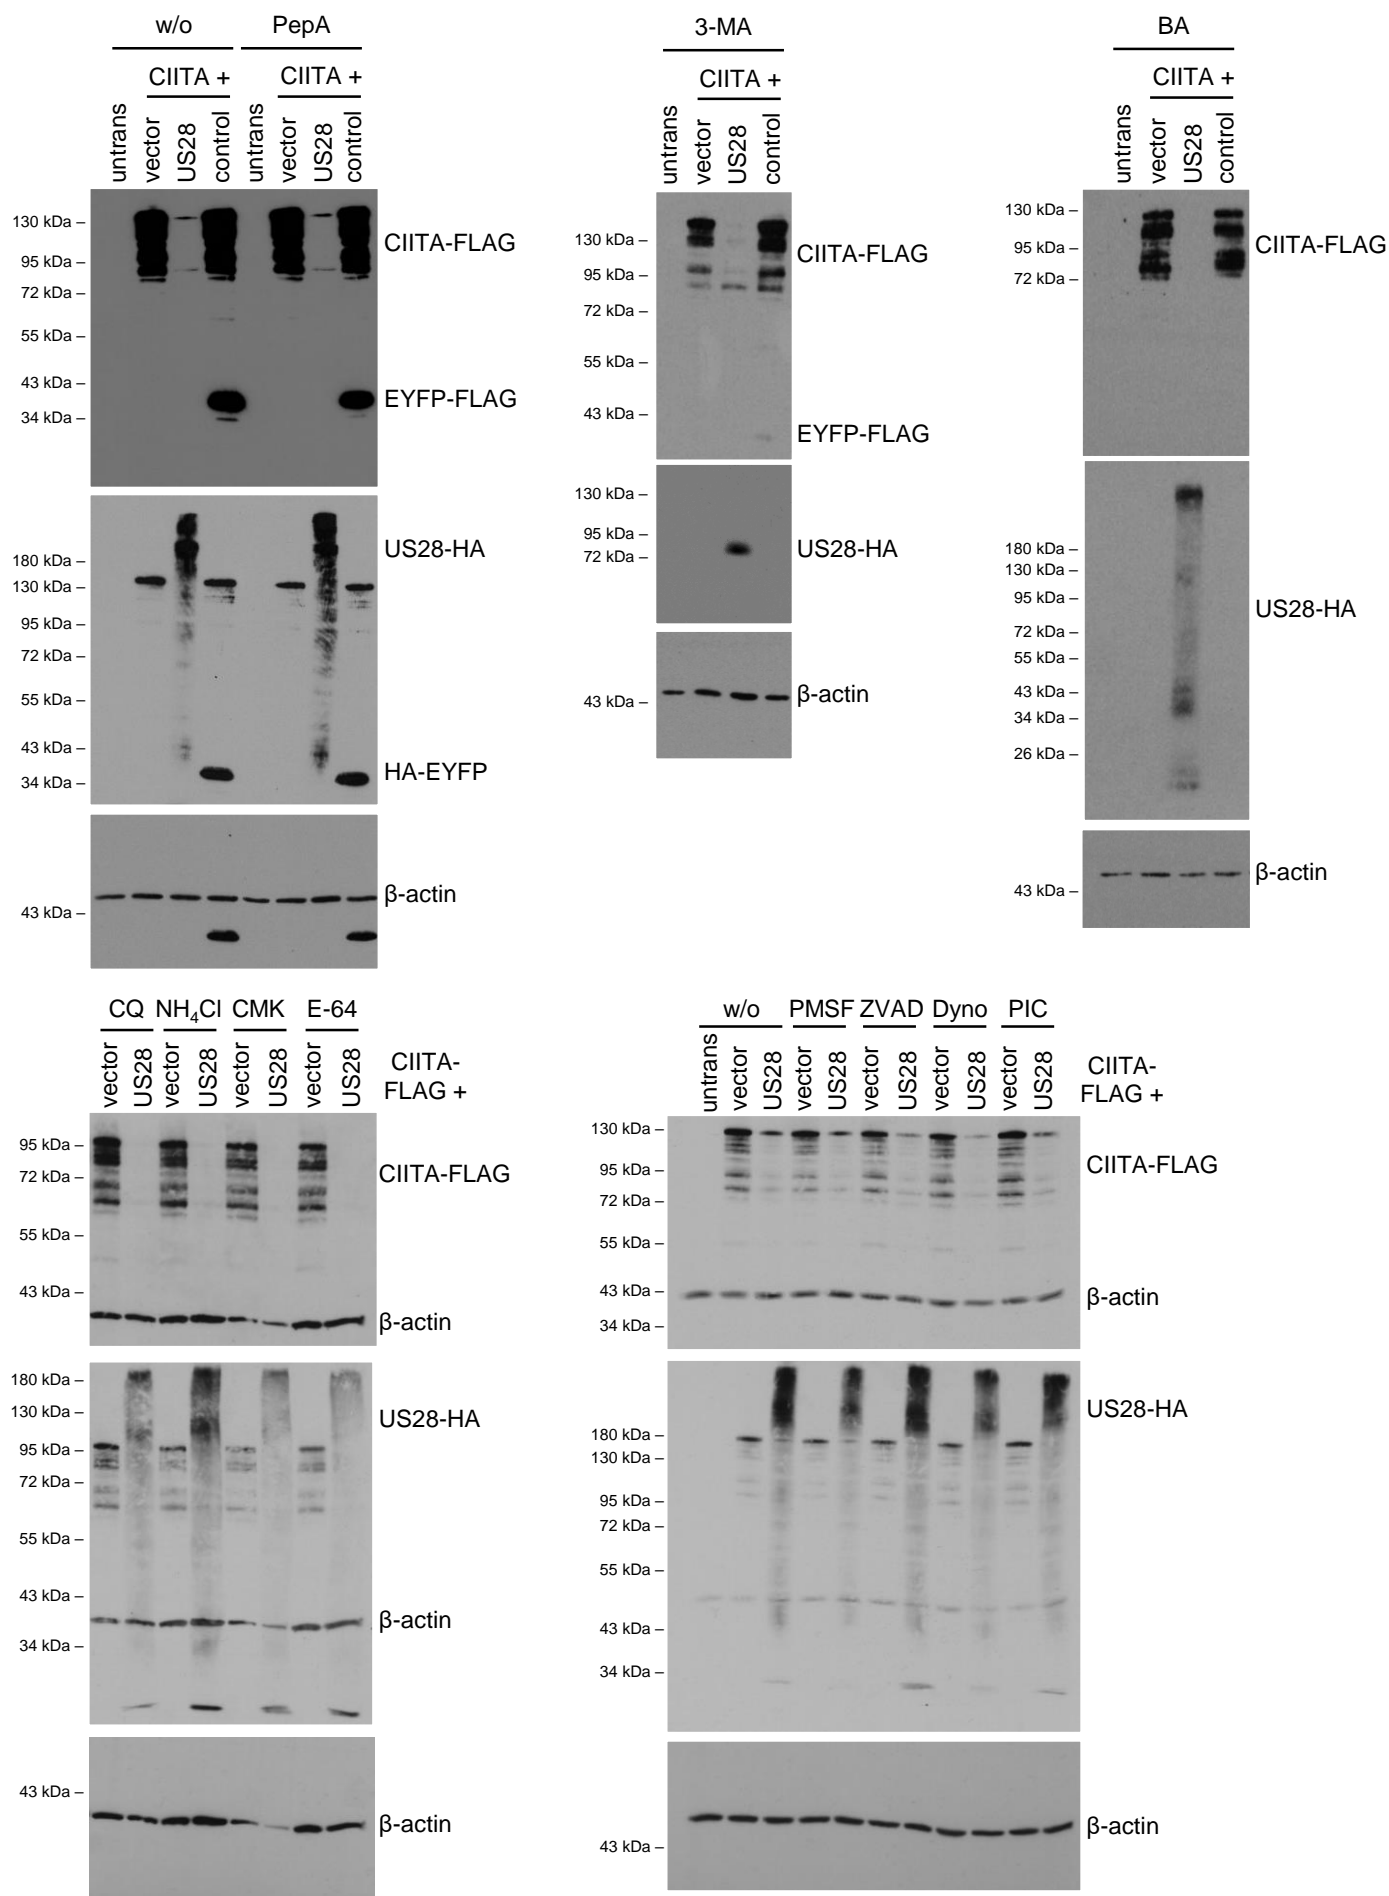

Supplement: fig6-figsupp4-data1 [file elife-96414-fig6-figsupp4-data1-v1.zip]

Figure 6 – figure supplement 4 A

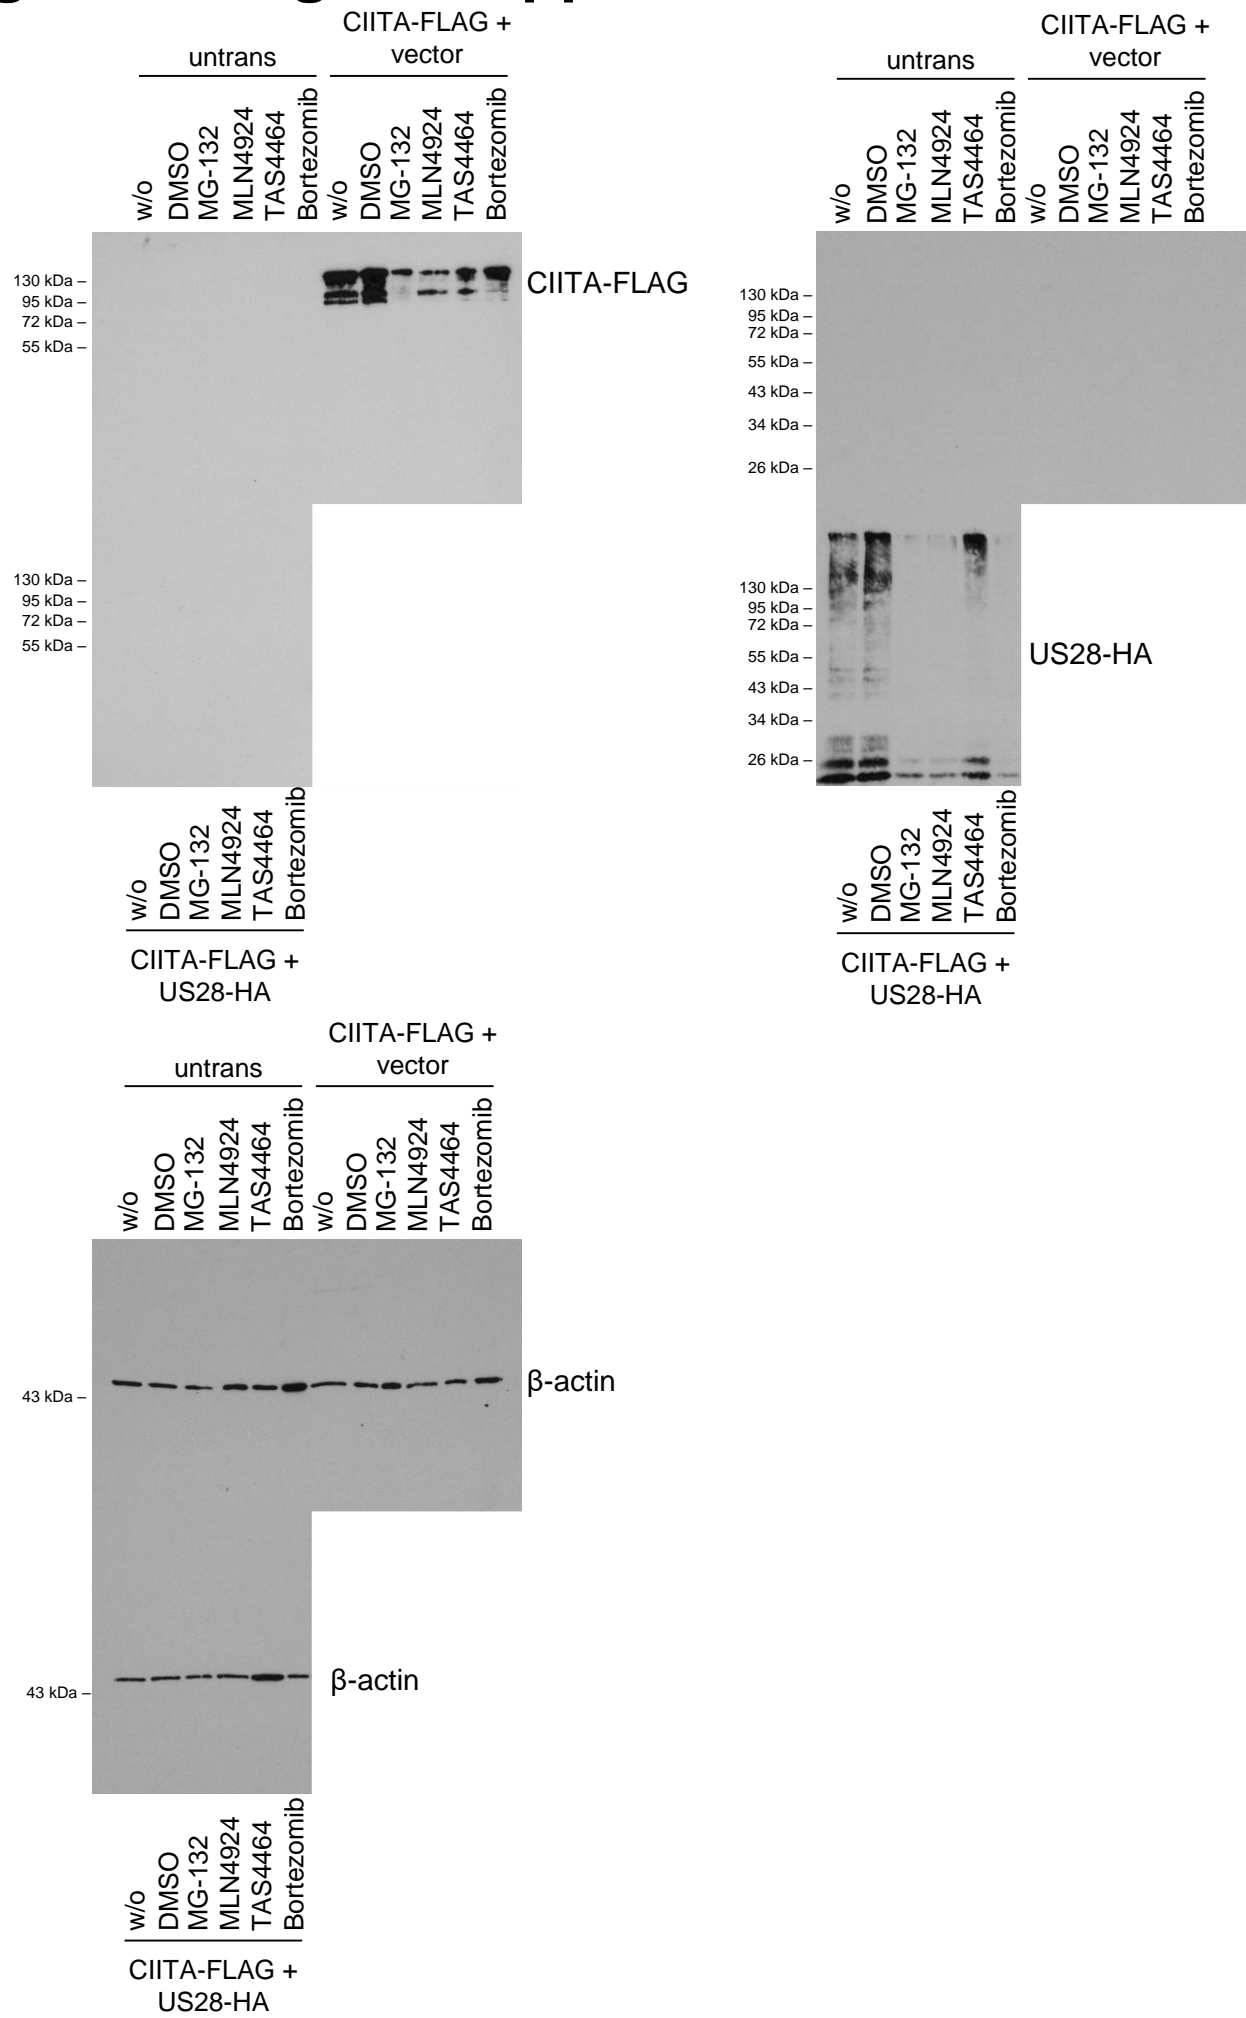

Supplement: fig6-figsupp4-data1 [file elife-96414-fig6-figsupp4-data1-v1.zip]

Figure 7I

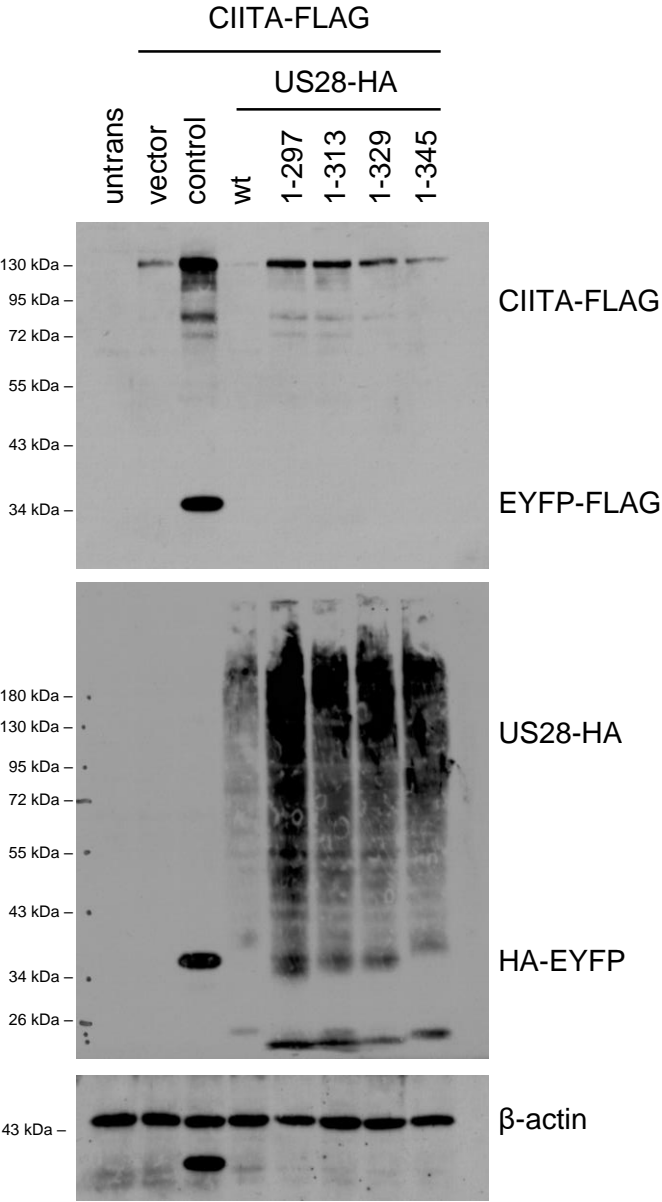

Supplement: fig7-data1 [file elife-96414-fig7-data1-v1.zip]

Figure 7H

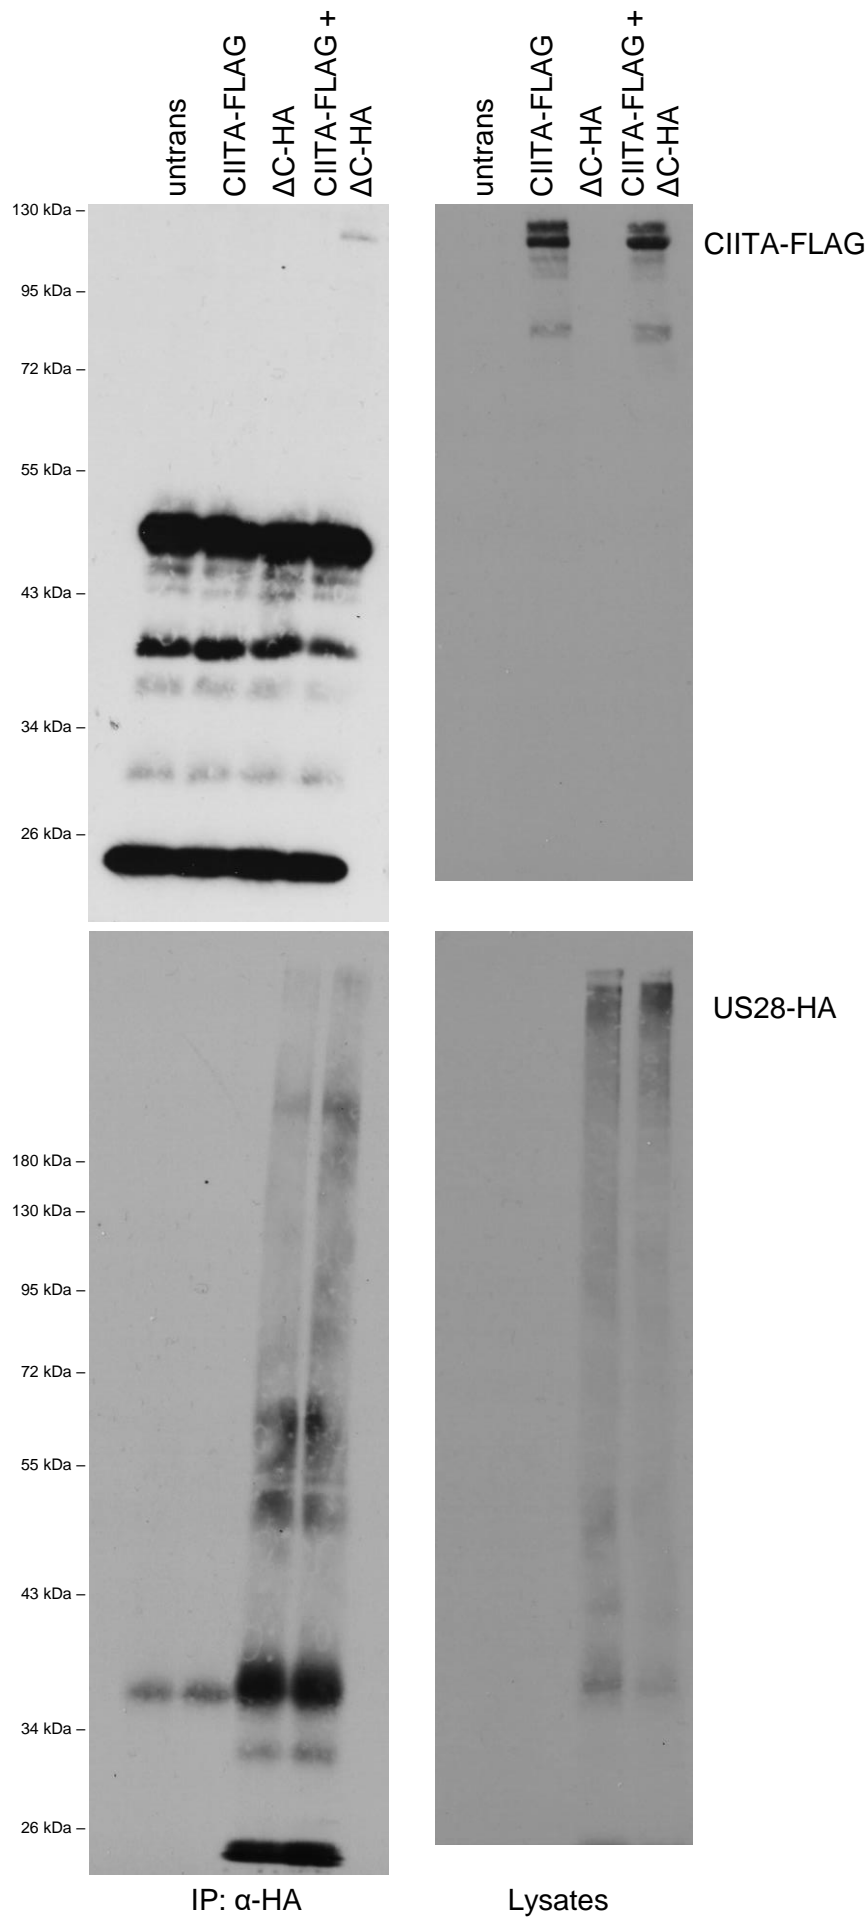

Supplement: fig7-data1 [file elife-96414-fig7-data1-v1.zip]

Figure 7C

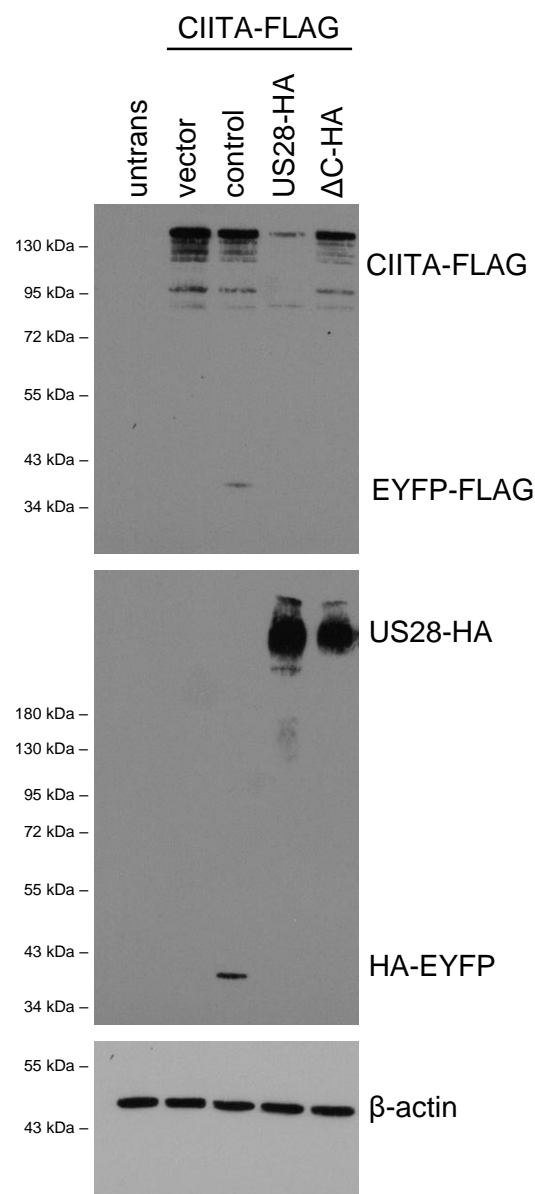

Supplement: fig7-data1 [file elife-96414-fig7-data1-v1.zip]

Figure 7B

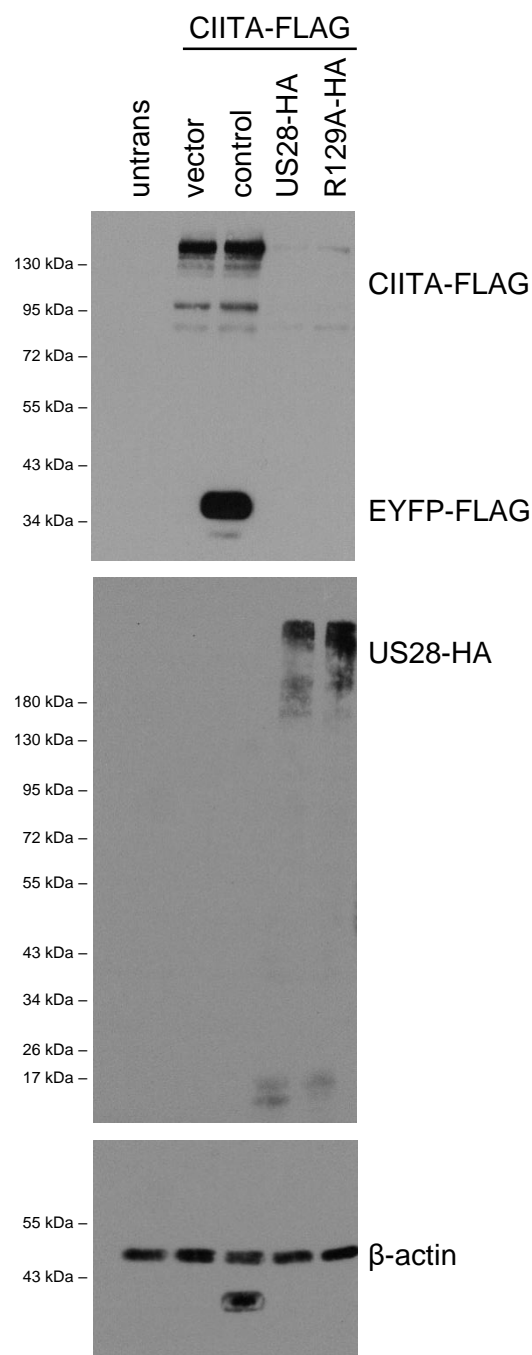

Supplement: fig7-data1 [file elife-96414-fig7-data1-v1.zip]
